# Supplementary material for: Comparison of the MicroRNA Expression Profiles of Male and Female Avian Primordial Germ Cell Lines
Source: Hindawi journal article supplement (doi:10.1155/2018/1780679), 2018-07-10

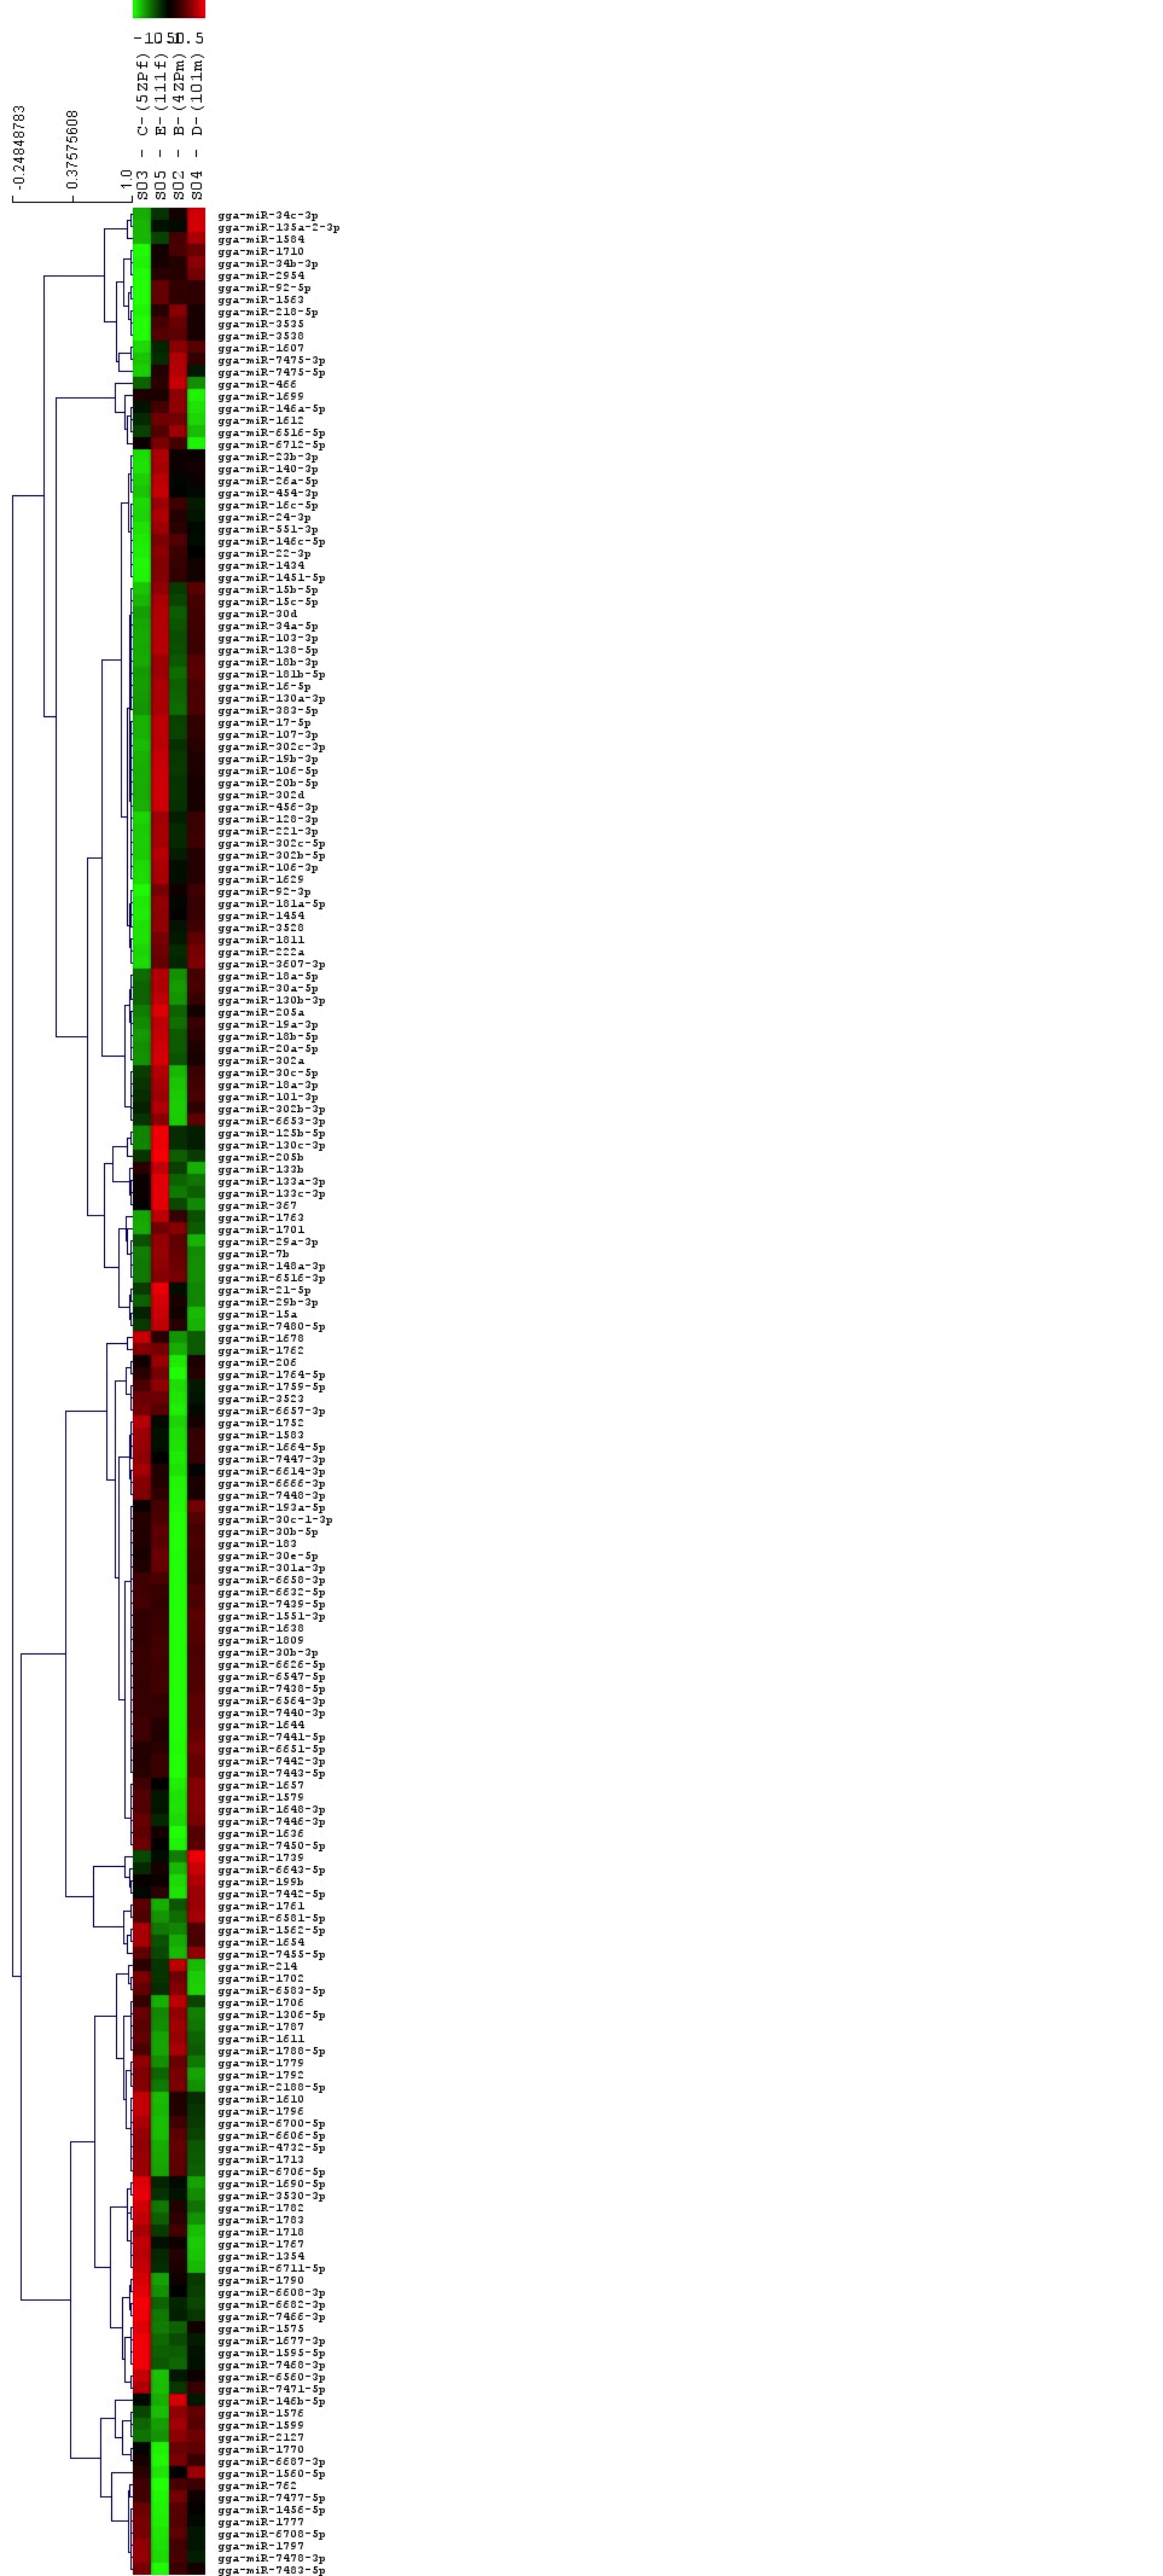

Supplement: f5 [file 1780679.f5.pdf]
