# Supplementary material for: Comparison of the MicroRNA Expression Profiles of Male and Female Avian Primordial Germ Cell Lines
Source: Stem Cells Int. 2018 Jul 10;2018:1780679. doi: 10.1155/2018/1780679 (PMC6079386; doi:10.1155/2018/1780679)
Supplement: Supplementary 1 — Table 1: used primers at qPCR runs and sex PCR and inhibition. [file 1780679.f1.xlsx]

## Sheet: qPCR primers
		Gene Symbol	Gene Full Name (organism)	NCBI number	Primers		Length of the product (bp)
		cGAPDH	Glyceraldehyde-3-phosphate dehydrogenase (Gallus gallus)	NM_204305.1	FW	GACGTGCAGCAGGAACACTA	112
					RV	CTTGGACTTTGCCAGAGAGG
		cNANOG	Nanog homeobox (Gallus gallus)	NM_001146142.1	FW	ATACCCCAGACTCTGCCACT	100
					RV	GCCTTCCTTGTCCCACTCTC
		cPOUV	POU domain class 5 transcription factor 3 (Pou5f3) (Gallus gallus)	NM_001110178.1	FW	GAGGCAGAGAACACGGACAA	109
					RV	TTCCCTTCACGTTGGTCTCG
		CVH	DEAD-box helicase 4 (DDX4)(Gallus gallus)	NM_204708.1	FW	GAACCTACCATCCACCAGCA	113
					RV	ATGCTACCGAAGTTGCCACA
		cDAZL	Deleted in azoospermia like (Gallus gallus)	NM_204218.1	FW	TGGTACTGTGAAGGAGGTGA	148
					RV	TGGTCCCAGTTTCAGCCTTT

## Sheet: Sex PCR primers
	Gene	NCBI number	Primers		Length of the product (bp)
	P2/P8-Z	NC_006127.3	FW	TCTGCATCGCTAAATCCTTT	345
	P2/P8-W	NW_003766117.1	RV	CTCCCAAGGATGAGAAATTG	362

## Sheet: TaqMan assays inhibitors
	Name	Gene	Accession number	Assay ID	Sequency
	miR-92	hsa-miR-92	MI0000719	000430	UAUUGCACUUGUCCCGGCCUG
	miR-302a	bta-miR-302a	MI0009791	005807_mat	AAGUGCUUCCAUGUUUUAGUGA
	miR-302b-3p	hsa-miR-302b	MI0000772	000531	UAAGUGCUUCCAUGUUUUAGUAG
	miR-302b-5p	gga-miR-302b*	MI0003700	008131_mat	ACUUUAACAUGGAGGUGCUUUCU
	U6	U6 snRNA	NR_004394	001973	GTGCTCGCTTCGGCAGCACATATACTAAAATTGGAACGATACAGAGAAGATTAGCATGGCCCCTGCGCAAGGATGACACGCAAATTCGTGAAGCGTTCCATATTTT
	Name	Gene	Catalog number	Assay ID	Type of inhibitor
	anti-miR-302b-3p	hsa-miR-302b-3p	AM17000	AM10081	anti-miRTM-miRNA inhibitor
	anti-miR-302b-5p	gga-miR-302b-5p	4464084	MH11349	mirVanaTM miRNA Inhibitor
