# Supplementary material for: Comparison of the MicroRNA Expression Profiles of Male and Female Avian Primordial Germ Cell Lines
Source: Stem Cells Int. 2018 Jul 10;2018:1780679. doi: 10.1155/2018/1780679 (PMC6079386; doi:10.1155/2018/1780679)
Supplement: Supplementary 3 — Table 6: LC array layout. [file 1780679.f3.xls]

## Sheet: Summary
Catalog Array
Part No.	MRA-1005
Name	Chicken miRNA Array
Version No.	miRChicken_21
	No. of Unique Probes	No. of Repeats
Standard Mature miRNAs*
Chicken	991	3
Controls**	50	4 to 20
www.lcsciences.com
* Based on Sanger miRBase Release 21
** The number and sequence subjects to change without notice

## Sheet: Sequence List
Index	Reporter Name	Target Seq (5' to 3')	Group	Reporter Control Type	Reporter BioSequence Database Entry[mirna]	Comment	Reporter Source	Accession No.	Chicken
1	gga-let-7a-2-3p	CUGUACAACCUCCUAGCUUUCC	experimental		gga-let-7a-2-3p	mature miRNA	standard	MIMAT0031037	gga-let-7a-2-3p
2	gga-let-7a-3p	CUAUACAAUCUACUGUCUUUCC	experimental		gga-let-7a-3p	mature miRNA	standard	MIMAT0026491,MIMAT0026543	gga-let-7a-3p, gga-let-7k-3p
3	gga-let-7a-5p	UGAGGUAGUAGGUUGUAUAGUU	experimental		gga-let-7a-5p	mature miRNA	standard	MIMAT0001101,MIMAT0001181	gga-let-7a-5p, gga-let-7j-5p
4	gga-let-7b	UGAGGUAGUAGGUUGUGUGGUU	experimental		gga-let-7b	mature miRNA	standard	MIMAT0001102	gga-let-7b
5	gga-let-7c-3p	CUGUACAACCUUCUAGCUUUCC	experimental		gga-let-7c-3p	mature miRNA	standard	MIMAT0026492	gga-let-7c-3p
6	gga-let-7c-5p	UGAGGUAGUAGGUUGUAUGGUU	experimental		gga-let-7c-5p	mature miRNA	standard	MIMAT0001104	gga-let-7c-5p
7	gga-let-7d	AGAGGUAGUGGGUUGCAUAGU	experimental		gga-let-7d	mature miRNA	standard	MIMAT0001161	gga-let-7d
8	gga-let-7f-3p	CUAUACAAUCUAUUGCCUUCCC	experimental		gga-let-7f-3p	mature miRNA	standard	MIMAT0026528	gga-let-7f-3p
9	gga-let-7f-5p	UGAGGUAGUAGAUUGUAUAGUU	experimental		gga-let-7f-5p	mature miRNA	standard	MIMAT0001162	gga-let-7f-5p
10	gga-let-7g-3p	CUGUACAGGCCACUGCCUUGCC	experimental		gga-let-7g-3p	mature miRNA	standard	MIMAT0026527	gga-let-7g-3p
11	gga-let-7g-5p	UGAGGUAGUAGUUUGUACAGU	experimental		gga-let-7g-5p	mature miRNA	standard	MIMAT0001160	gga-let-7g-5p
12	gga-let-7i	UGAGGUAGUAGUUUGUGCUGU	experimental		gga-let-7i	mature miRNA	standard	MIMAT0001098	gga-let-7i
13	gga-let-7j-3p	CUAUACAGUCUAUUGCCUUCCU	experimental		gga-let-7j-3p	mature miRNA	standard	MIMAT0026542	gga-let-7j-3p
14	gga-let-7k-5p	UGAGGUAGUAGAUUGAAUAGUU	experimental		gga-let-7k-5p	mature miRNA	standard	MIMAT0001182	gga-let-7k-5p
15	gga-miR-1a-1-5p	ACAUACUUCUUUAUAUGCCCAUA	experimental		gga-miR-1a-1-5p	mature miRNA	standard	MIMAT0031071	gga-miR-1a-1-5p
16	gga-miR-1a-2-5p	ACAUACUUCUUUAUGUACCCAUA	experimental		gga-miR-1a-2-5p	mature miRNA	standard	MIMAT0026510	gga-miR-1a-2-5p
17	gga-miR-1a-3p	UGGAAUGUAAAGAAGUAUGUA	experimental		gga-miR-1a-3p	mature miRNA	standard	MIMAT0001127	gga-miR-1a-3p
18	gga-miR-1b-3p	UGGAAUGUUAAGAAGUAUGUA	experimental		gga-miR-1b-3p	mature miRNA	standard	MIMAT0001175	gga-miR-1b-3p
19	gga-miR-1b-5p	ACAUACUUCUUCAUAUGCCCAUA	experimental		gga-miR-1b-5p	mature miRNA	standard	MIMAT0026536	gga-miR-1b-5p
20	gga-miR-1c	UGGAAUGGAAAGCAGUAUGUAU	experimental		gga-miR-1c	mature miRNA	standard	MIMAT0007503	gga-miR-1c
21	gga-miR-7	UGGAAGACUAGUGAUUUUGUUG	experimental		gga-miR-7	mature miRNA	standard	MIMAT0001157	gga-miR-7
22	gga-miR-7b	UGGAAGACUAGUGAUUUUUGUU	experimental		gga-miR-7b	mature miRNA	standard	MIMAT0001192	gga-miR-7b
23	gga-miR-9-3p	UAAAGCUAGAGAACCGAAUGU	experimental		gga-miR-9-3p	mature miRNA	standard	MIMAT0003350	gga-miR-9-3p
24	gga-miR-9-5p	UCUUUGGUUAUCUAGCUGUAUGA	experimental		gga-miR-9-5p	mature miRNA	standard	MIMAT0001195	gga-miR-9-5p
25	gga-miR-10a-3p	AAAUUCGUAUCUAGGGGAAUA	experimental		gga-miR-10a-3p	mature miRNA	standard	MIMAT0007732	gga-miR-10a-3p
26	gga-miR-10a-5p	UACCCUGUAGAUCCGAAUUUGU	experimental		gga-miR-10a-5p	mature miRNA	standard	MIMAT0007731	gga-miR-10a-5p
27	gga-miR-10b-3p	AGAUUCGAUUCUAGGGGAAUA	experimental		gga-miR-10b-3p	mature miRNA	standard	MIMAT0026521	gga-miR-10b-3p
28	gga-miR-10b-5p	UACCCUGUAGAACCGAAUUUGU	experimental		gga-miR-10b-5p	mature miRNA	standard	MIMAT0001148	gga-miR-10b-5p
29	gga-miR-15a	UAGCAGCACAUAAUGGUUUGU	experimental		gga-miR-15a	mature miRNA	standard	MIMAT0001117	gga-miR-15a
30	gga-miR-15b-3p	GAAUCAUUAUUUGCUGCUUUA	experimental		gga-miR-15b-3p	mature miRNA	standard	MIMAT0026524	gga-miR-15b-3p
31	gga-miR-15b-5p	UAGCAGCACAUCAUGGUUUGCA	experimental		gga-miR-15b-5p	mature miRNA	standard	MIMAT0001154	gga-miR-15b-5p
32	gga-miR-15c-3p	CAGACCAUUCUGGGCUGCCUCA	experimental		gga-miR-15c-3p	mature miRNA	standard	MIMAT0007738	gga-miR-15c-3p
33	gga-miR-15c-5p	UAGCAGCACAUCAUGGUUUGUA	experimental		gga-miR-15c-5p	mature miRNA	standard	MIMAT0007737	gga-miR-15c-5p
34	gga-miR-16-1-3p	CCAGUAUUAACUGUGCUGCUGAA	experimental		gga-miR-16-1-3p	mature miRNA	standard	MIMAT0026500	gga-miR-16-1-3p
35	gga-miR-16-2-3p	CCAAUAUUAUUGUGCUGCUUAA	experimental		gga-miR-16-2-3p	mature miRNA	standard	MIMAT0031058	gga-miR-16-2-3p
36	gga-miR-16-5p	UAGCAGCACGUAAAUAUUGGUG	experimental		gga-miR-16-5p	mature miRNA	standard	MIMAT0001116	gga-miR-16-5p
37	gga-miR-16c-3p	CCAGUAUUGCAUUGCUGCUUUA	experimental		gga-miR-16c-3p	mature miRNA	standard	MIMAT0026786	gga-miR-16c-3p
38	gga-miR-16c-5p	UAGCAGCACGUAAAUACUGGAG	experimental		gga-miR-16c-5p	mature miRNA	standard	MIMAT0007739	gga-miR-16c-5p
39	gga-miR-17-3p	ACUGCAGUGAAGGCACUUGU	experimental		gga-miR-17-3p	mature miRNA	standard	MIMAT0001115	gga-miR-17-3p
40	gga-miR-17-5p	CAAAGUGCUUACAGUGCAGGUAGU	experimental		gga-miR-17-5p	mature miRNA	standard	MIMAT0001114	gga-miR-17-5p
41	gga-miR-18a-3p	ACUGCCCUAAGUGCUCCUUCUG	experimental		gga-miR-18a-3p	mature miRNA	standard	MIMAT0026499	gga-miR-18a-3p
42	gga-miR-18a-5p	UAAGGUGCAUCUAGUGCAGAUA	experimental		gga-miR-18a-5p	mature miRNA	standard	MIMAT0001113	gga-miR-18a-5p
43	gga-miR-18b-3p	UACUGCCCUAAAUGCUCCUUCUGGC	experimental		gga-miR-18b-3p	mature miRNA	standard	MIMAT0026516	gga-miR-18b-3p
44	gga-miR-18b-5p	UAAGGUGCAUCUAGUGCAGUUA	experimental		gga-miR-18b-5p	mature miRNA	standard	MIMAT0001141	gga-miR-18b-5p
45	gga-miR-19a-3p	UGUGCAAAUCUAUGCAAAACUGA	experimental		gga-miR-19a-3p	mature miRNA	standard	MIMAT0001112	gga-miR-19a-3p
46	gga-miR-19a-5p	AGUUUUGCAUAGUUGCACUAC	experimental		gga-miR-19a-5p	mature miRNA	standard	MIMAT0026498	gga-miR-19a-5p
47	gga-miR-19b-3p	UGUGCAAAUCCAUGCAAAACUGA	experimental		gga-miR-19b-3p	mature miRNA	standard	MIMAT0001110	gga-miR-19b-3p
48	gga-miR-19b-5p	AGUUUUGCAGGUUUGCAUCCAGC	experimental		gga-miR-19b-5p	mature miRNA	standard	MIMAT0026496	gga-miR-19b-5p
49	gga-miR-20a-3p	AAUCUACUGCAUUAUAAGCACUUAAAGU	experimental		gga-miR-20a-3p	mature miRNA	standard	MIMAT0026497	gga-miR-20a-3p
50	gga-miR-20a-5p	UAAAGUGCUUAUAGUGCAGGUAG	experimental		gga-miR-20a-5p	mature miRNA	standard	MIMAT0001111	gga-miR-20a-5p
51	gga-miR-20b-3p	ACUGUAAUGUGGGCACUUACAG	experimental		gga-miR-20b-3p	mature miRNA	standard	MIMAT0026551	gga-miR-20b-3p
52	gga-miR-20b-5p	CAAAGUGCUCAUAGUGCAGGUAG	experimental		gga-miR-20b-5p	mature miRNA	standard	MIMAT0001411	gga-miR-20b-5p
53	gga-miR-21-3p	CAACAACAGUCGGUAGGCUGUC	experimental		gga-miR-21-3p	mature miRNA	standard	MIMAT0026643	gga-miR-21-3p
54	gga-miR-21-5p	UAGCUUAUCAGACUGAUGUUGA	experimental		gga-miR-21-5p	mature miRNA	standard	MIMAT0003774	gga-miR-21-5p
55	gga-miR-22-3p	AAGCUGCCAGUUGAAGAACUGU	experimental		gga-miR-22-3p	mature miRNA	standard	MIMAT0007288	gga-miR-22-3p
56	gga-miR-22-5p	AGUUCUUCAGUGGCAAGCUUUA	experimental		gga-miR-22-5p	mature miRNA	standard	MIMAT0007287	gga-miR-22-5p
57	gga-miR-23b-3p	AUCACAUUGCCAGGGAUUACC	experimental		gga-miR-23b-3p	mature miRNA	standard	MIMAT0001186	gga-miR-23b-3p
58	gga-miR-23b-5p	GGGUUCCUGGCAUGAUGAUUU	experimental		gga-miR-23b-5p	mature miRNA	standard	MIMAT0026546	gga-miR-23b-5p
59	gga-miR-24-3p	UGGCUCAGUUCAGCAGGAACAG	experimental		gga-miR-24-3p	mature miRNA	standard	MIMAT0001188	gga-miR-24-3p
60	gga-miR-24-5p	GUGCCUACUGAGCUGAUAUCAGU	experimental		gga-miR-24-5p	mature miRNA	standard	MIMAT0026548	gga-miR-24-5p
61	gga-miR-26a-3p	CCUAUUCUUGGUUACUUGCACUG	experimental		gga-miR-26a-3p	mature miRNA	standard	MIMAT0026501	gga-miR-26a-3p
62	gga-miR-26a-5p	UUCAAGUAAUCCAGGAUAGGC	experimental		gga-miR-26a-5p	mature miRNA	standard	MIMAT0001118	gga-miR-26a-5p
63	gga-miR-27b-3p	UUCACAGUGGCUAAGUUCUGC	experimental		gga-miR-27b-3p	mature miRNA	standard	MIMAT0001187	gga-miR-27b-3p
64	gga-miR-27b-5p	AGAGCUUAGCUGAUUGGUGAACA	experimental		gga-miR-27b-5p	mature miRNA	standard	MIMAT0026547	gga-miR-27b-5p
65	gga-miR-29a-3p	UAGCACCAUUUGAAAUCGGUU	experimental		gga-miR-29a-3p	mature miRNA	standard	MIMAT0001096	gga-miR-29a-3p
66	gga-miR-29a-5p	CUGAUUUCUUUUGGUGUUCAGA	experimental		gga-miR-29a-5p	mature miRNA	standard	MIMAT0026487	gga-miR-29a-5p
67	gga-miR-29b-1-5p	AGCUGGUUUCAUAUGGUGGUUUAGA	experimental		gga-miR-29b-1-5p	mature miRNA	standard	MIMAT0026488	gga-miR-29b-1-5p
68	gga-miR-29b-2-5p	AGCUGGUUUCACAUGGUGGCUUAGA	experimental		gga-miR-29b-2-5p	mature miRNA	standard	MIMAT0031072	gga-miR-29b-2-5p
69	gga-miR-29b-3p	UAGCACCAUUUGAAAUCAGUGUU	experimental		gga-miR-29b-3p	mature miRNA	standard	MIMAT0001097	gga-miR-29b-3p
70	gga-miR-29c-3p	UAGCACCAUUUGAAAUCGGU	experimental		gga-miR-29c-3p	mature miRNA	standard	MIMAT0001183	gga-miR-29c-3p
71	gga-miR-29c-5p	CCGAUUUCUCUUGGUGUUCAG	experimental		gga-miR-29c-5p	mature miRNA	standard	MIMAT0026544	gga-miR-29c-5p
72	gga-miR-30a-3p	CUUUCAGUCGGAUGUUUGCAGC	experimental		gga-miR-30a-3p	mature miRNA	standard	MIMAT0001136	gga-miR-30a-3p
73	gga-miR-30a-5p	UGUAAACAUCCUCGACUGGAAG	experimental		gga-miR-30a-5p	mature miRNA	standard	MIMAT0001135	gga-miR-30a-5p
74	gga-miR-30b-3p	CUGGGGGGUGGAUGUUUACUUC	experimental		gga-miR-30b-3p	mature miRNA	standard	MIMAT0026512	gga-miR-30b-3p
75	gga-miR-30b-5p	UGUAAACAUCCUACACUCAGCU	experimental		gga-miR-30b-5p	mature miRNA	standard	MIMAT0001130	gga-miR-30b-5p
76	gga-miR-30c-1-3p	UGGGAGAGGAUUGUUUACGCC	experimental		gga-miR-30c-1-3p	mature miRNA	standard	MIMAT0031105	gga-miR-30c-1-3p
77	gga-miR-30c-2-3p	UGGGAGAAGGCUGUUUACUCU	experimental		gga-miR-30c-2-3p	mature miRNA	standard	MIMAT0026515	gga-miR-30c-2-3p
78	gga-miR-30c-5p	UGUAAACAUCCUACACUCUCAGCU	experimental		gga-miR-30c-5p	mature miRNA	standard	MIMAT0001137	gga-miR-30c-5p
79	gga-miR-30d	UGUAAACAUCCCCGACUGGAAG	experimental		gga-miR-30d	mature miRNA	standard	MIMAT0001129	gga-miR-30d
80	gga-miR-30e-3p	UUUCAGUCGGAUGUUUACAGC	experimental		gga-miR-30e-3p	mature miRNA	standard	MIMAT0026538	gga-miR-30e-3p
81	gga-miR-30e-5p	UGUAAACAUCCUUGACUGG	experimental		gga-miR-30e-5p	mature miRNA	standard	MIMAT0001177	gga-miR-30e-5p
82	gga-miR-31-3p	UGCUAUGCCAACAUAUUGUCAUC	experimental		gga-miR-31-3p	mature miRNA	standard	MIMAT0026549	gga-miR-31-3p
83	gga-miR-31-5p	AGGCAAGAUGUUGGCAUAGCUG	experimental		gga-miR-31-5p	mature miRNA	standard	MIMAT0001189	gga-miR-31-5p
84	gga-miR-32-3p	AAUUUAGUGUGUGCGAUACU	experimental		gga-miR-32-3p	mature miRNA	standard	MIMAT0026508	gga-miR-32-3p
85	gga-miR-32-5p	UAUUGCACAUUACUAAGUUGC	experimental		gga-miR-32-5p	mature miRNA	standard	MIMAT0001125	gga-miR-32-5p
86	gga-miR-33-3p	AAUGUUCCUGCAGUGCAGUA	experimental		gga-miR-33-3p	mature miRNA	standard	MIMAT0026490	gga-miR-33-3p
87	gga-miR-33-5p	GUGCAUUGUAGUUGCAUUGC	experimental		gga-miR-33-5p	mature miRNA	standard	MIMAT0001100	gga-miR-33-5p
88	gga-miR-34a-3p	CAAUCAGCAAGUAUACUGCCCUA	experimental		gga-miR-34a-3p	mature miRNA	standard	MIMAT0026535	gga-miR-34a-3p
89	gga-miR-34a-5p	UGGCAGUGUCUUAGCUGGUUGUU	experimental		gga-miR-34a-5p	mature miRNA	standard	MIMAT0001173	gga-miR-34a-5p
90	gga-miR-34b-3p	AAUCACUAAAUUCACUGCCAUC	experimental		gga-miR-34b-3p	mature miRNA	standard	MIMAT0026540	gga-miR-34b-3p
91	gga-miR-34b-5p	CAGGCAGUGUAGUUAGCUGAUUG	experimental		gga-miR-34b-5p	mature miRNA	standard	MIMAT0001179	gga-miR-34b-5p
92	gga-miR-34c-3p	AAUCACUAACCACACAGCCAGG	experimental		gga-miR-34c-3p	mature miRNA	standard	MIMAT0026541	gga-miR-34c-3p
93	gga-miR-34c-5p	AGGCAGUGUAGUUAGCUGAUUGC	experimental		gga-miR-34c-5p	mature miRNA	standard	MIMAT0001180	gga-miR-34c-5p
94	gga-miR-92-3p	UAUUGCACUUGUCCCGGCCUG	experimental		gga-miR-92-3p	mature miRNA	standard	MIMAT0001109	gga-miR-92-3p
95	gga-miR-92-5p	AGGUUGGGAUCAGUUGCAAUGCU	experimental		gga-miR-92-5p	mature miRNA	standard	MIMAT0026495	gga-miR-92-5p
96	gga-miR-99a-3p	CAAGCUCGCUUCUAUGGGUCU	experimental		gga-miR-99a-3p	mature miRNA	standard	MIMAT0006781	gga-miR-99a-3p
97	gga-miR-99a-5p	AACCCGUAGAUCCGAUCUUGUG	experimental		gga-miR-99a-5p	mature miRNA	standard	MIMAT0001103	gga-miR-99a-5p
98	gga-miR-100-3p	AAGCUUGUAUCUAUAGGUAUG	experimental		gga-miR-100-3p	mature miRNA	standard	MIMAT0026539	gga-miR-100-3p
99	gga-miR-100-5p	AACCCGUAGAUCCGAACUUGUG	experimental		gga-miR-100-5p	mature miRNA	standard	MIMAT0001178	gga-miR-100-5p
100	gga-miR-101-1-5p	UCGGUUAUCAUGGUACCGGUGCU	experimental		gga-miR-101-1-5p	mature miRNA	standard	MIMAT0026545	gga-miR-101-1-5p
101	gga-miR-101-2-5p	UCAGUUAUCACAGUGCUGAUGCU	experimental		gga-miR-101-2-5p	mature miRNA	standard	MIMAT0031077	gga-miR-101-2-5p
102	gga-miR-101-3p	GUACAGUACUGUGAUAACUGAA	experimental		gga-miR-101-3p	mature miRNA	standard	MIMAT0001185	gga-miR-101-3p
103	gga-miR-103-1-5p	UCGGCUUCUUUACAGUGCUGCCUUG	experimental		gga-miR-103-1-5p	mature miRNA	standard	MIMAT0031070	gga-miR-103-1-5p
104	gga-miR-103-2-5p	AGCUUCUUUACAGUGCUGCCUUG	experimental		gga-miR-103-2-5p	mature miRNA	standard	MIMAT0026519	gga-miR-103-2-5p
105	gga-miR-103-3p	AGCAGCAUUGUACAGGGCUAUGA	experimental		gga-miR-103-3p	mature miRNA	standard	MIMAT0001145	gga-miR-103-3p
106	gga-miR-106-3p	ACUGCAGUAUAAGCACUUCUGG	experimental		gga-miR-106-3p	mature miRNA	standard	MIMAT0026517	gga-miR-106-3p
107	gga-miR-106-5p	AAAAGUGCUUACAGUGCAGGUA	experimental		gga-miR-106-5p	mature miRNA	standard	MIMAT0001142	gga-miR-106-5p
108	gga-miR-107-3p	AGCAGCAUUGUACAGGGCUAUCA	experimental		gga-miR-107-3p	mature miRNA	standard	MIMAT0001147	gga-miR-107-3p
109	gga-miR-107-5p	AGCUUCUUUACAGUGUUGCCUUG	experimental		gga-miR-107-5p	mature miRNA	standard	MIMAT0026520	gga-miR-107-5p
110	gga-miR-122-3p	AACGCCAUUAUCACACUAAAUA	experimental		gga-miR-122-3p	mature miRNA	standard	MIMAT0026550	gga-miR-122-3p
111	gga-miR-122-5p	UGGAGUGUGACAAUGGUGUUUGU	experimental		gga-miR-122-5p	mature miRNA	standard	MIMAT0001190	gga-miR-122-5p
112	gga-miR-122b	AGUGUGACACUGGUGUUUUU	experimental		gga-miR-122b	mature miRNA	standard	MIMAT0007719	gga-miR-122b
113	gga-miR-124a-3p	UUAAGGCACGCGGUGAAUGCCA	experimental		gga-miR-124a-3p	mature miRNA	standard	MIMAT0001128	gga-miR-124a-3p
114	gga-miR-124a-5p	GUUCACAGCGGACCUUGAU	experimental		gga-miR-124a-5p	mature miRNA	standard	MIMAT0026511	gga-miR-124a-5p
115	gga-miR-124b	UUAAGGCACGCAGUGAAUGCCA	experimental		gga-miR-124b	mature miRNA	standard	MIMAT0001174	gga-miR-124b
116	gga-miR-124c-3p	UCAAGGUCCGCUGUGAACACGG	experimental		gga-miR-124c-3p	mature miRNA	standard	MIMAT0025600	gga-miR-124c-3p
117	gga-miR-124c-5p	CAUUCACCGCGUGCCUUAAUU	experimental		gga-miR-124c-5p	mature miRNA	standard	MIMAT0025599	gga-miR-124c-5p
118	gga-miR-125b-3p	ACAAGUCAGGCUCUUGGGACCU	experimental		gga-miR-125b-3p	mature miRNA	standard	MIMAT0026493	gga-miR-125b-3p
119	gga-miR-125b-5p	UCCCUGAGACCCUAACUUGUGA	experimental		gga-miR-125b-5p	mature miRNA	standard	MIMAT0001105	gga-miR-125b-5p
120	gga-miR-126-3p	UCGUACCGUGAGUAAUAAUGCGC	experimental		gga-miR-126-3p	mature miRNA	standard	MIMAT0001169	gga-miR-126-3p
121	gga-miR-126-5p	CAUUAUUACUUUUGGUACGCG	experimental		gga-miR-126-5p	mature miRNA	standard	MIMAT0003723	gga-miR-126-5p
122	gga-miR-128-1-5p	CGGGGCCGUAACACUGUCUGAGA	experimental		gga-miR-128-1-5p	mature miRNA	standard	MIMAT0031096	gga-miR-128-1-5p
123	gga-miR-128-2-5p	GGGGGCCGUUACACUGUAAGAGA	experimental		gga-miR-128-2-5p	mature miRNA	standard	MIMAT0026506	gga-miR-128-2-5p
124	gga-miR-128-3p	UCACAGUGAACCGGUCUCUUU	experimental		gga-miR-128-3p	mature miRNA	standard	MIMAT0001123	gga-miR-128-3p
125	gga-miR-130a-3p	CAGUGCAAUAUUAAAAGGGCAU	experimental		gga-miR-130a-3p	mature miRNA	standard	MIMAT0001167	gga-miR-130a-3p
126	gga-miR-130a-5p	GCCCUUUUUCUGUUGUACUACU	experimental		gga-miR-130a-5p	mature miRNA	standard	MIMAT0026532	gga-miR-130a-5p
127	gga-miR-130b-3p	CAGUGCAAUAAUGAAAGGGCGU	experimental		gga-miR-130b-3p	mature miRNA	standard	MIMAT0001165	gga-miR-130b-3p
128	gga-miR-130b-5p	CCUCUUUCCCUGUUGCACUACU	experimental		gga-miR-130b-5p	mature miRNA	standard	MIMAT0026530	gga-miR-130b-5p
129	gga-miR-130c-3p	CAGUGCAAUGUUAAAAGGGCAU	experimental		gga-miR-130c-3p	mature miRNA	standard	MIMAT0007734	gga-miR-130c-3p
130	gga-miR-130c-5p	GCCCUUUUUAUGUUGUACUACU	experimental		gga-miR-130c-5p	mature miRNA	standard	MIMAT0007733	gga-miR-130c-5p
131	gga-miR-133a-3p	UUGGUCCCCUUCAACCAGCUGU	experimental		gga-miR-133a-3p	mature miRNA	standard	MIMAT0001126	gga-miR-133a-3p
132	gga-miR-133a-5p	AGCUGGUAAAAUGGAACCAAAUC	experimental		gga-miR-133a-5p	mature miRNA	standard	MIMAT0026509	gga-miR-133a-5p
133	gga-miR-133b	UUGGUCCCCUUCAACCAGCUA	experimental		gga-miR-133b	mature miRNA	standard	MIMAT0001138	gga-miR-133b
134	gga-miR-133c-3p	UUGGUCCCCUUCAACCAGCUGC	experimental		gga-miR-133c-3p	mature miRNA	standard	MIMAT0001176	gga-miR-133c-3p
135	gga-miR-133c-5p	GCUGGUAAAAAGGAACCAGAUC	experimental		gga-miR-133c-5p	mature miRNA	standard	MIMAT0026537	gga-miR-133c-5p
136	gga-miR-135a-1-3p	AUAUAGGGAUUGAAGCCGUGCA	experimental		gga-miR-135a-1-3p	mature miRNA	standard	MIMAT0031036	gga-miR-135a-1-3p
137	gga-miR-135a-2-3p	AUGUAGGGAUGGAAGCCAUGAA	experimental		gga-miR-135a-2-3p	mature miRNA	standard	MIMAT0026489	gga-miR-135a-2-3p
138	gga-miR-135a-3-3p	AUGUAGGGCGAAAAGCCAUGGG	experimental		gga-miR-135a-3-3p	mature miRNA	standard	MIMAT0031038	gga-miR-135a-3-3p
139	gga-miR-135a-5p	UAUGGCUUUUUAUUCCUAUGUGA	experimental		gga-miR-135a-5p	mature miRNA	standard	MIMAT0001099	gga-miR-135a-5p
140	gga-miR-135b	UAUGGCUUUUUAUUCCUUUU	experimental		gga-miR-135b	mature miRNA	standard	MIMAT0007536	gga-miR-135b
141	gga-miR-137-3p	UAUUGCUUAAGAAUACGCGUAG	experimental		gga-miR-137-3p	mature miRNA	standard	MIMAT0001153	gga-miR-137-3p
142	gga-miR-137-5p	ACGGGUAUUCUUGGGUGGAUAAUA	experimental		gga-miR-137-5p	mature miRNA	standard	MIMAT0026523	gga-miR-137-5p
143	gga-miR-138-1-3p	UACUUCACAACACCAGGGUG	experimental		gga-miR-138-1-3p	mature miRNA	standard	MIMAT0026505	gga-miR-138-1-3p
144	gga-miR-138-2-3p	UAUUUCACUACACCAGGGUU	experimental		gga-miR-138-2-3p	mature miRNA	standard	MIMAT0031069	gga-miR-138-2-3p
145	gga-miR-138-5p	AGCUGGUGUUGUGAAUC	experimental		gga-miR-138-5p	mature miRNA	standard	MIMAT0001122	gga-miR-138-5p
146	gga-miR-140-3p	CCACAGGGUAGAACCACGGAC	experimental		gga-miR-140-3p	mature miRNA	standard	MIMAT0003722	gga-miR-140-3p
147	gga-miR-140-5p	AGUGGUUUUACCCUAUGGUAG	experimental		gga-miR-140-5p	mature miRNA	standard	MIMAT0001159	gga-miR-140-5p
148	gga-miR-142-3p	UGUAGUGUUUCCUACUUUAUGG	experimental		gga-miR-142-3p	mature miRNA	standard	MIMAT0001194	gga-miR-142-3p
149	gga-miR-142-5p	CCCAUAAAGUAGAAAGCACUAC	experimental		gga-miR-142-5p	mature miRNA	standard	MIMAT0001193	gga-miR-142-5p
150	gga-miR-144-3p	CUACAGUAUAGAUGAUGUACUC	experimental		gga-miR-144-3p	mature miRNA	standard	MIMAT0003776	gga-miR-144-3p
151	gga-miR-144-5p	GGAUAUCAUCAUAUACUGUAAG	experimental		gga-miR-144-5p	mature miRNA	standard	MIMAT0026644	gga-miR-144-5p
152	gga-miR-146a-3p	ACCCAUGGGGCUCAGUUCUUCAG	experimental		gga-miR-146a-3p	mature miRNA	standard	MIMAT0026529	gga-miR-146a-3p
153	gga-miR-146a-5p	UGAGAACUGAAUUCCAUGGGUU	experimental		gga-miR-146a-5p	mature miRNA	standard	MIMAT0001163	gga-miR-146a-5p
154	gga-miR-146b-3p	CCCUAUGGAUUCAGUUCUGC	experimental		gga-miR-146b-3p	mature miRNA	standard	MIMAT0003724	gga-miR-146b-3p
155	gga-miR-146b-5p	UGAGAACUGAAUUCCAUAGGCG	experimental		gga-miR-146b-5p	mature miRNA	standard	MIMAT0003351	gga-miR-146b-5p
156	gga-miR-146c-3p	AGUCCAUGGUAUUCAGUUCUCU	experimental		gga-miR-146c-3p	mature miRNA	standard	MIMAT0007736	gga-miR-146c-3p
157	gga-miR-146c-5p	UGAGAACUGAAUUCCAUGGACUG	experimental		gga-miR-146c-5p	mature miRNA	standard	MIMAT0007735	gga-miR-146c-5p
158	gga-miR-147	GUGUGCGGAAAUGCUUCUGC	experimental		gga-miR-147	mature miRNA	standard	MIMAT0003352	gga-miR-147
159	gga-miR-148a-3p	UCAGUGCACUACAGAACUUUGU	experimental		gga-miR-148a-3p	mature miRNA	standard	MIMAT0001120	gga-miR-148a-3p
160	gga-miR-148a-5p	AAAGUUCUGUGACACUCAGACU	experimental		gga-miR-148a-5p	mature miRNA	standard	MIMAT0026503	gga-miR-148a-5p
161	gga-miR-153-3p	UUGCAUAGUCACAAAAGUGA	experimental		gga-miR-153-3p	mature miRNA	standard	MIMAT0001119	gga-miR-153-3p
162	gga-miR-153-5p	UCAUUUUUGUGAUGUUGCAGCU	experimental		gga-miR-153-5p	mature miRNA	standard	MIMAT0026502	gga-miR-153-5p
163	gga-miR-155	UUAAUGCUAAUCGUGAUAGGGG	experimental		gga-miR-155	mature miRNA	standard	MIMAT0001106	gga-miR-155
164	gga-miR-181a-3p	ACCAUCGACCGUUGAUUGUACC	experimental		gga-miR-181a-3p	mature miRNA	standard	MIMAT0001150	gga-miR-181a-3p
165	gga-miR-181a-5p	AACAUUCAACGCUGUCGGUGAGU	experimental		gga-miR-181a-5p	mature miRNA	standard	MIMAT0001168	gga-miR-181a-5p
166	gga-miR-181b-1-3p	UCACUGAACAAUGAAUGCAAC	experimental		gga-miR-181b-1-3p	mature miRNA	standard	MIMAT0026522	gga-miR-181b-1-3p
167	gga-miR-181b-2-3p	UCACUGAUCAAUGAAUGCAAA	experimental		gga-miR-181b-2-3p	mature miRNA	standard	MIMAT0031059	gga-miR-181b-2-3p
168	gga-miR-181b-5p	AACAUUCAUUGCUGUCGGUGGG	experimental		gga-miR-181b-5p	mature miRNA	standard	MIMAT0001151	gga-miR-181b-5p
169	gga-miR-183	UAUGGCACUGGUAGAAUUCACUG	experimental		gga-miR-183	mature miRNA	standard	MIMAT0001191	gga-miR-183
170	gga-miR-184-3p	UGGACGGAGAACUGAUAAGGGU	experimental		gga-miR-184-3p	mature miRNA	standard	MIMAT0001158	gga-miR-184-3p
171	gga-miR-184-5p	CCUUAUCACUUUUCCAGCCCAGC	experimental		gga-miR-184-5p	mature miRNA	standard	MIMAT0026526	gga-miR-184-5p
172	gga-miR-187-3p	UCGUGUCUUGUGUUGCAGCC	experimental		gga-miR-187-3p	mature miRNA	standard	MIMAT0001124	gga-miR-187-3p
173	gga-miR-187-5p	GGCUACAACACAGGACAUGGGA	experimental		gga-miR-187-5p	mature miRNA	standard	MIMAT0026507	gga-miR-187-5p
174	gga-miR-190a-3p	CUAUAUAUCAAACAUAUUCCU	experimental		gga-miR-190a-3p	mature miRNA	standard	MIMAT0026525	gga-miR-190a-3p
175	gga-miR-190a-5p	UGAUAUGUUUGAUAUAUUAGGU	experimental		gga-miR-190a-5p	mature miRNA	standard	MIMAT0001155	gga-miR-190a-5p
176	gga-miR-193a-3p	AACUGGCCUACAAAGUCCCAGU	experimental		gga-miR-193a-3p	mature miRNA	standard	MIMAT0007740	gga-miR-193a-3p
177	gga-miR-193a-5p	UGGGUCUUUGCGGGCGAGAUGA	experimental		gga-miR-193a-5p	mature miRNA	standard	MIMAT0026787	gga-miR-193a-5p
178	gga-miR-193b-3p	AACUGGCCCACAAAGUCCCGCUUU	experimental		gga-miR-193b-3p	mature miRNA	standard	MIMAT0003353	gga-miR-193b-3p
179	gga-miR-193b-5p	CGGGGUUUUGGGGGCGAGAUGA	experimental		gga-miR-193b-5p	mature miRNA	standard	MIMAT0026629	gga-miR-193b-5p
180	gga-miR-194	UGUAACAGCAACUCCAUGUGGA	experimental		gga-miR-194	mature miRNA	standard	MIMAT0001133	gga-miR-194
181	gga-miR-196-1-3p	CAAGAACAUCAAACUACCUGAU	experimental		gga-miR-196-1-3p	mature miRNA	standard	MIMAT0031017	gga-miR-196-1-3p
182	gga-miR-196-2-3p	CUACAGCACGAAACUGCCUUAA	experimental		gga-miR-196-2-3p	mature miRNA	standard	MIMAT0026504	gga-miR-196-2-3p
183	gga-miR-196-5p	UAGGUAGUUUCAUGUUGUUGG	experimental		gga-miR-196-5p	mature miRNA	standard	MIMAT0001121	gga-miR-196-5p
184	gga-miR-199-3p	UACAGUAGUCUGCACAUUGG	experimental		gga-miR-199-3p	mature miRNA	standard	MIMAT0003721	gga-miR-199-3p
185	gga-miR-199-5p	CCCAGUGUUCAGACUACCUGUUC	experimental		gga-miR-199-5p	mature miRNA	standard	MIMAT0001152	gga-miR-199-5p
186	gga-miR-199b	CAGUAGUCUGCACAUUUGGU	experimental		gga-miR-199b	mature miRNA	standard	MIMAT0007583	gga-miR-199b
187	gga-miR-200a-3p	UAACACUGUCUGGUAACGAUGU	experimental		gga-miR-200a-3p	mature miRNA	standard	MIMAT0001171	gga-miR-200a-3p
188	gga-miR-200a-5p	CAUCUUACUAGACAGUGCUGGA	experimental		gga-miR-200a-5p	mature miRNA	standard	MIMAT0026533	gga-miR-200a-5p
189	gga-miR-200b-3p	UAAUACUGCCUGGUAAUGAUGAU	experimental		gga-miR-200b-3p	mature miRNA	standard	MIMAT0001172	gga-miR-200b-3p
190	gga-miR-200b-5p	UCUUACUGGGCAGCAUUGGA	experimental		gga-miR-200b-5p	mature miRNA	standard	MIMAT0026534	gga-miR-200b-5p
191	gga-miR-202-3p	AGAGGCAUAGAGCAUGGGAAAA	experimental		gga-miR-202-3p	mature miRNA	standard	MIMAT0003355	gga-miR-202-3p
192	gga-miR-202-5p	UUUCCUAUGCAUAUACUUCUUU	experimental		gga-miR-202-5p	mature miRNA	standard	MIMAT0003354	gga-miR-202-5p
193	gga-miR-203a	GUGAAAUGUUUAGGACCACUUG	experimental		gga-miR-203a	mature miRNA	standard	MIMAT0001146	gga-miR-203a
194	gga-miR-204	UUCCCUUUGUCAUCCUAUGCCU	experimental		gga-miR-204	mature miRNA	standard	MIMAT0001156,MIMAT0003368	gga-miR-204, gga-miR-211
195	gga-miR-205a	UCCUUCAUUCCACCGGAGUCUG	experimental		gga-miR-205a	mature miRNA	standard	MIMAT0001184	gga-miR-205a
196	gga-miR-205b	CCCUUCAUUCCACCGGAAUCUG	experimental		gga-miR-205b	mature miRNA	standard	MIMAT0001164	gga-miR-205b
197	gga-miR-206	UGGAAUGUAAGGAAGUGUGUGG	experimental		gga-miR-206	mature miRNA	standard	MIMAT0001139	gga-miR-206
198	gga-miR-214	ACAGCAGGCACAGACAGGCAG	experimental		gga-miR-214	mature miRNA	standard	MIMAT0007751	gga-miR-214
199	gga-miR-215-3p	CCUGUCAUUUCUAUAGGCCAAUA	experimental		gga-miR-215-3p	mature miRNA	standard	MIMAT0026514	gga-miR-215-3p
200	gga-miR-215-5p	AUGACCUAUGAAUUGACAGAC	experimental		gga-miR-215-5p	mature miRNA	standard	MIMAT0001134	gga-miR-215-5p
201	gga-miR-216a	UAAUCUCAGCUGGCAACUGUG	experimental		gga-miR-216a	mature miRNA	standard	MIMAT0001131	gga-miR-216a
202	gga-miR-216b	AAAUCUCUGCAGGCAAAUGUGA	experimental		gga-miR-216b	mature miRNA	standard	MIMAT0007748	gga-miR-216b
203	gga-miR-216c	AUCUCUACAGGUAAUUGUGAGA	experimental		gga-miR-216c	mature miRNA	standard	MIMAT0007339	gga-miR-216c
204	gga-miR-217-3p	CCAUCAGUUCCUAAUGCAUUGCC	experimental		gga-miR-217-3p	mature miRNA	standard	MIMAT0026513	gga-miR-217-3p
205	gga-miR-217-5p	UACUGCAUCAGGAACUGAUUGGAU	experimental		gga-miR-217-5p	mature miRNA	standard	MIMAT0001132	gga-miR-217-5p
206	gga-miR-218-3p	CAUGGUUCUGUCAAGCACCAUG	experimental		gga-miR-218-3p	mature miRNA	standard	MIMAT0026518	gga-miR-218-3p
207	gga-miR-218-5p	UUGUGCUUGAUCUAACCAUGU	experimental		gga-miR-218-5p	mature miRNA	standard	MIMAT0001144	gga-miR-218-5p
208	gga-miR-219a	UGAUUGUCCAAACGCAAUUCU	experimental		gga-miR-219a	mature miRNA	standard	MIMAT0001170	gga-miR-219a
209	gga-miR-219b	CACAAGAAUUGCGUUUGGACAA	experimental		gga-miR-219b	mature miRNA	standard	MIMAT0016380	gga-miR-219b
210	gga-miR-221-3p	AGCUACAUUGUCUGCUGGGUUUC	experimental		gga-miR-221-3p	mature miRNA	standard	MIMAT0001108	gga-miR-221-3p
211	gga-miR-221-5p	AACCUGGCAUACAAUGUAGAUUUCUGU	experimental		gga-miR-221-5p	mature miRNA	standard	MIMAT0026494	gga-miR-221-5p
212	gga-miR-222a	AGCUACAUCUGGCUACUGGGUCUC	experimental		gga-miR-222a	mature miRNA	standard	MIMAT0001107	gga-miR-222a
213	gga-miR-222b-3p	AGCUACAUCUGAUUACUGGGUCAC	experimental		gga-miR-222b-3p	mature miRNA	standard	MIMAT0025618	gga-miR-222b-3p
214	gga-miR-222b-5p	UGCUCAGUAGUCAGUGUAGGAUCUGU	experimental		gga-miR-222b-5p	mature miRNA	standard	MIMAT0025617	gga-miR-222b-5p
215	gga-miR-223	UGUCAGUUUGUCAAAUACCCC	experimental		gga-miR-223	mature miRNA	standard	MIMAT0001140	gga-miR-223
216	gga-miR-301a-3p	CAGUGCAAUAAUAUUGUCAAAGCAU	experimental		gga-miR-301a-3p	mature miRNA	standard	MIMAT0001166	gga-miR-301a-3p
217	gga-miR-301a-5p	UCUGACAAUGUUGCACUACU	experimental		gga-miR-301a-5p	mature miRNA	standard	MIMAT0026531	gga-miR-301a-5p
218	gga-miR-301b-3p	CAGUGCAAUAGUAUUGUCAAAGCAU	experimental		gga-miR-301b-3p	mature miRNA	standard	MIMAT0007742	gga-miR-301b-3p
219	gga-miR-301b-5p	GCUCUGACUUUAUUGCACUACU	experimental		gga-miR-301b-5p	mature miRNA	standard	MIMAT0007741	gga-miR-301b-5p
220	gga-miR-302a	AAGUGCUUCCAUGUUUUAGUGA	experimental		gga-miR-302a	mature miRNA	standard	MIMAT0001143	gga-miR-302a
221	gga-miR-302b-3p	UAAGUGCUUCCAUGUUUUAGUAG	experimental		gga-miR-302b-3p	mature miRNA	standard	MIMAT0003357	gga-miR-302b-3p
222	gga-miR-302b-5p	ACUUUAACAUGGAGGUGCUUUCU	experimental		gga-miR-302b-5p	mature miRNA	standard	MIMAT0003356	gga-miR-302b-5p
223	gga-miR-302c-3p	UAAGUGCUUCCAUGUUUCAGUGG	experimental		gga-miR-302c-3p	mature miRNA	standard	MIMAT0003359	gga-miR-302c-3p
224	gga-miR-302c-5p	UUUAACAUGGAGGUACCUGCUG	experimental		gga-miR-302c-5p	mature miRNA	standard	MIMAT0003358	gga-miR-302c-5p
225	gga-miR-302d	UAAGUGCUUCCAUGUUUUAGUUG	experimental		gga-miR-302d	mature miRNA	standard	MIMAT0003360	gga-miR-302d
226	gga-miR-365-1-5p	GAGGGACUUUUGGGGGCAGAUGU	experimental		gga-miR-365-1-5p	mature miRNA	standard	MIMAT0026630	gga-miR-365-1-5p
227	gga-miR-365-2-5p	GAGGGACUUUCAGGGGCAGCUGU	experimental		gga-miR-365-2-5p	mature miRNA	standard	MIMAT0031075	gga-miR-365-2-5p
228	gga-miR-365-3p	UAAUGCCCCUAAAAAUCCUUAU	experimental		gga-miR-365-3p	mature miRNA	standard	MIMAT0003361	gga-miR-365-3p
229	gga-miR-365b-5p	AGGAUUUUUAGGGGCAUUAUGA	experimental		gga-miR-365b-5p	mature miRNA	standard	MIMAT0025674	gga-miR-365b-5p
230	gga-miR-367	AAUUGCACUUUAGCAAUGGUG	experimental		gga-miR-367	mature miRNA	standard	MIMAT0003369	gga-miR-367
231	gga-miR-375	UUUGUUCGUUCGGCUCGCGUUA	experimental		gga-miR-375	mature miRNA	standard	MIMAT0003362	gga-miR-375
232	gga-miR-383-3p	CCACAGCACUGCCUGGUCAGA	experimental		gga-miR-383-3p	mature miRNA	standard	MIMAT0026631	gga-miR-383-3p
233	gga-miR-383-5p	AGAUCAGAAGGUGAUUGUGGCU	experimental		gga-miR-383-5p	mature miRNA	standard	MIMAT0003363	gga-miR-383-5p
234	gga-miR-429-3p	UAAUACUGUCUGGUAAUGCCGU	experimental		gga-miR-429-3p	mature miRNA	standard	MIMAT0003371	gga-miR-429-3p
235	gga-miR-429-5p	UGUCUUACCAGGCAAAGUUAGA	experimental		gga-miR-429-5p	mature miRNA	standard	MIMAT0026635	gga-miR-429-5p
236	gga-miR-449a	UGGCAGUGUAUGUUAGCUGGU	experimental		gga-miR-449a	mature miRNA	standard	MIMAT0003372	gga-miR-449a
237	gga-miR-449b-3p	CAGUCACUACCACACUGCCAC	experimental		gga-miR-449b-3p	mature miRNA	standard	MIMAT0007744	gga-miR-449b-3p
238	gga-miR-449b-5p	AGGCAGUGUGCUGUUAGCGGCUG	experimental		gga-miR-449b-5p	mature miRNA	standard	MIMAT0007743	gga-miR-449b-5p
239	gga-miR-449c-3p	CAGCUGCUCACGGCACUCCAGA	experimental		gga-miR-449c-3p	mature miRNA	standard	MIMAT0007603	gga-miR-449c-3p
240	gga-miR-449c-5p	UGGCAGUGCGUGUUAGCUGGCUGU	experimental		gga-miR-449c-5p	mature miRNA	standard	MIMAT0007602	gga-miR-449c-5p
241	gga-miR-451	AAACCGUUACCAUUACUGAGUUU	experimental		gga-miR-451	mature miRNA	standard	MIMAT0003775	gga-miR-451
242	gga-miR-454-3p	UAGUGCAAUAUUGCUUAUAGGGU	experimental		gga-miR-454-3p	mature miRNA	standard	MIMAT0007292	gga-miR-454-3p
243	gga-miR-454-5p	UCCUAACCUUAAGGAUGAG	experimental		gga-miR-454-5p	mature miRNA	standard	MIMAT0007291	gga-miR-454-5p
244	gga-miR-455-3p	UGCAGUCCAUGGGCAUAUACAC	experimental		gga-miR-455-3p	mature miRNA	standard	MIMAT0006788	gga-miR-455-3p
245	gga-miR-455-5p	UAUGUGCCCUUGGACUACAUCG	experimental		gga-miR-455-5p	mature miRNA	standard	MIMAT0003364	gga-miR-455-5p
246	gga-miR-456-3p	CAGGCUGGUUAGAUGGUUGUCA	experimental		gga-miR-456-3p	mature miRNA	standard	MIMAT0003777	gga-miR-456-3p
247	gga-miR-456-5p	CAGGCAUCUUCUCAGCCUACAUGUG	experimental		gga-miR-456-5p	mature miRNA	standard	MIMAT0026645	gga-miR-456-5p
248	gga-miR-458a-3p	AUAGCUCUUUGAAUGGUACUGC	experimental		gga-miR-458a-3p	mature miRNA	standard	MIMAT0007746	gga-miR-458a-3p
249	gga-miR-458a-5p	AGCGCCAUUUUCAGAGCUAUA	experimental		gga-miR-458a-5p	mature miRNA	standard	MIMAT0007745	gga-miR-458a-5p
250	gga-miR-458b-3p	AUAGCUCUGAAAAUGGCGCUG	experimental		gga-miR-458b-3p	mature miRNA	standard	MIMAT0025831	gga-miR-458b-3p
251	gga-miR-458b-5p	AGUACCAUUCAAAGAGCUAUGA	experimental		gga-miR-458b-5p	mature miRNA	standard	MIMAT0025830	gga-miR-458b-5p
252	gga-miR-460a-3p	CACAGCGCAUACAAUGUGGAUU	experimental		gga-miR-460a-3p	mature miRNA	standard	MIMAT0026646	gga-miR-460a-3p
253	gga-miR-460a-5p	CCUGCAUUGUACACACUGUGUG	experimental		gga-miR-460a-5p	mature miRNA	standard	MIMAT0003778	gga-miR-460a-5p
254	gga-miR-460b-3p	CACAGCGCAUGCAAUGUGGACAU	experimental		gga-miR-460b-3p	mature miRNA	standard	MIMAT0007327	gga-miR-460b-3p
255	gga-miR-460b-5p	UCCUCAUUGUACAUGCUGUGUG	experimental		gga-miR-460b-5p	mature miRNA	standard	MIMAT0007326	gga-miR-460b-5p
256	gga-miR-466	AUAUAUACACACACACAUAAGAC	experimental		gga-miR-466	mature miRNA	standard	MIMAT0003370	gga-miR-466
257	gga-miR-489-3p	AGUGACAUCAUAUGUACGGCUGC	experimental		gga-miR-489-3p	mature miRNA	standard	MIMAT0003365	gga-miR-489-3p
258	gga-miR-489-5p	UGGUCGUAUGUAUGACGUCAUU	experimental		gga-miR-489-5p	mature miRNA	standard	MIMAT0026632	gga-miR-489-5p
259	gga-miR-490-3p	CAACCUGGAGGACUCCAUGCUG	experimental		gga-miR-490-3p	mature miRNA	standard	MIMAT0003366	gga-miR-490-3p
260	gga-miR-490-5p	CCAUGGAUCUCCAGGUGGGU	experimental		gga-miR-490-5p	mature miRNA	standard	MIMAT0026633	gga-miR-490-5p
261	gga-miR-499-3p	AACAUCACUUUAAGUCUGUGCU	experimental		gga-miR-499-3p	mature miRNA	standard	MIMAT0026634	gga-miR-499-3p
262	gga-miR-499-5p	UUAAGACUUGUAGUGAUGUUUAG	experimental		gga-miR-499-5p	mature miRNA	standard	MIMAT0003367	gga-miR-499-5p
263	gga-miR-551-3p	GCGACCCAUACUUGGUUUCAG	experimental		gga-miR-551-3p	mature miRNA	standard	MIMAT0007290	gga-miR-551-3p
264	gga-miR-551-5p	GAAAUCAAGGGUGGGUAAGACCU	experimental		gga-miR-551-5p	mature miRNA	standard	MIMAT0007289	gga-miR-551-5p
265	gga-miR-757	GCAGAGCUGCAGAUGGGAUUC	experimental		gga-miR-757	mature miRNA	standard	MIMAT0003779	gga-miR-757
266	gga-miR-762	GGGGCUUUGGGGAGGGAGGGGA	experimental		gga-miR-762	mature miRNA	standard	MIMAT0007752	gga-miR-762
267	gga-miR-1306-3p	UGGACGUUGGCUCUGGUGGUGAU	experimental		gga-miR-1306-3p	mature miRNA	standard	MIMAT0007329	gga-miR-1306-3p
268	gga-miR-1306-5p	ACCACCUCCCCUGCAAACGUCCAGU	experimental		gga-miR-1306-5p	mature miRNA	standard	MIMAT0026763	gga-miR-1306-5p
269	gga-miR-1329-3p	CCUCGUAGCUUGAUCACGAUAU	experimental		gga-miR-1329-3p	mature miRNA	standard	MIMAT0007282	gga-miR-1329-3p
270	gga-miR-1329-5p	UACAGUGAUCACGUUACGAUGG	experimental		gga-miR-1329-5p	mature miRNA	standard	MIMAT0007281	gga-miR-1329-5p
271	gga-miR-1354	CAUGGUGAUGAUGUGCUGAAG	experimental		gga-miR-1354	mature miRNA	standard	MIMAT0007446	gga-miR-1354
272	gga-miR-1397-3p	GAUGUAACCCAACGCAGCAUGA	experimental		gga-miR-1397-3p	mature miRNA	standard	MIMAT0007284	gga-miR-1397-3p
273	gga-miR-1397-5p	UGCAUUGCGACGGGUUAUAUCA	experimental		gga-miR-1397-5p	mature miRNA	standard	MIMAT0007283	gga-miR-1397-5p
274	gga-miR-1416-3p	ACAAUUGUAUGAGUUGAGUACA	experimental		gga-miR-1416-3p	mature miRNA	standard	MIMAT0007286	gga-miR-1416-3p
275	gga-miR-1416-5p	UCCUUAACUCAUGCCGCUGUG	experimental		gga-miR-1416-5p	mature miRNA	standard	MIMAT0007285	gga-miR-1416-5p
276	gga-miR-1434	GUGCGUGAUGAUGGAAAAUU	experimental		gga-miR-1434	mature miRNA	standard	MIMAT0007295	gga-miR-1434
277	gga-miR-1451-3p	CGUAACUCGCUGCUGUGAGAGGC	experimental		gga-miR-1451-3p	mature miRNA	standard	MIMAT0007325	gga-miR-1451-3p
278	gga-miR-1451-5p	UCGCACAGGAGCAAGUUACCGC	experimental		gga-miR-1451-5p	mature miRNA	standard	MIMAT0007324	gga-miR-1451-5p
279	gga-miR-1452	UUGAGAUAAGACAGAGGAUAUU	experimental		gga-miR-1452	mature miRNA	standard	MIMAT0007328	gga-miR-1452
280	gga-miR-1453	UGGGCAGCCUCUCAGUGAGCUCU	experimental		gga-miR-1453	mature miRNA	standard	MIMAT0007330	gga-miR-1453
281	gga-miR-1454	GUACAAUGAUGAGACUUUGGCUCC	experimental		gga-miR-1454	mature miRNA	standard	MIMAT0007331	gga-miR-1454
282	gga-miR-1456-3p	CGGGGUCGUCGCCGUCCCUUC	experimental		gga-miR-1456-3p	mature miRNA	standard	MIMAT0007334	gga-miR-1456-3p
283	gga-miR-1456-5p	GAAAGGACGGAGGCGGCCCGCGC	experimental		gga-miR-1456-5p	mature miRNA	standard	MIMAT0007333	gga-miR-1456-5p
284	gga-miR-1457	CACUACAGGCUGCAAAAGGGUU	experimental		gga-miR-1457	mature miRNA	standard	MIMAT0007335	gga-miR-1457
285	gga-miR-1458	UUCCUGUGAUGCUCAUGAGAA	experimental		gga-miR-1458	mature miRNA	standard	MIMAT0007336	gga-miR-1458
286	gga-miR-1459	AUCCUGUGAUGUUCUAUAACUGAGGUUU	experimental		gga-miR-1459	mature miRNA	standard	MIMAT0007337	gga-miR-1459
287	gga-miR-1460	AAUUUAUUGCAGCCUUCUCAGGGU	experimental		gga-miR-1460	mature miRNA	standard	MIMAT0007338	gga-miR-1460
288	gga-miR-1462-3p	UAUCUGUCCUUGUGAGCCCCAGA	experimental		gga-miR-1462-3p	mature miRNA	standard	MIMAT0026764	gga-miR-1462-3p
289	gga-miR-1462-5p	UGGCUUUCCAUGACAGGUUGG	experimental		gga-miR-1462-5p	mature miRNA	standard	MIMAT0007340	gga-miR-1462-5p
290	gga-miR-1463	GUUCUAUGAUGCUUUGCUGAGAAUU	experimental		gga-miR-1463	mature miRNA	standard	MIMAT0007341	gga-miR-1463
291	gga-miR-1464	UGCUGUUUGCAGGGCCGCCUCGGA	experimental		gga-miR-1464	mature miRNA	standard	MIMAT0007342	gga-miR-1464
292	gga-miR-1465	UUUCAGAGGUGCUGGGUGCUU	experimental		gga-miR-1465	mature miRNA	standard	MIMAT0007343	gga-miR-1465
293	gga-miR-1466	GCGCUCAGGCUGGUGCUGGGGGAU	experimental		gga-miR-1466	mature miRNA	standard	MIMAT0007344	gga-miR-1466
294	gga-miR-1467-3p	UCACACCAGAGUAACUGGGAUC	experimental		gga-miR-1467-3p	mature miRNA	standard	MIMAT0007346	gga-miR-1467-3p
295	gga-miR-1467-5p	UCUCAGCUACAUCGGUGUAAAUC	experimental		gga-miR-1467-5p	mature miRNA	standard	MIMAT0007345	gga-miR-1467-5p
296	gga-miR-1550-3p	CUUCACUUACACUGCUCACUGGU	experimental		gga-miR-1550-3p	mature miRNA	standard	MIMAT0007404	gga-miR-1550-3p
297	gga-miR-1550-5p	UGAUGGGGGUGUAGUGCAGCA	experimental		gga-miR-1550-5p	mature miRNA	standard	MIMAT0007403	gga-miR-1550-5p
298	gga-miR-1551-3p	UGAGUUUGUGUUGCUGCUUUCU	experimental		gga-miR-1551-3p	mature miRNA	standard	MIMAT0007406	gga-miR-1551-3p
299	gga-miR-1551-5p	CUAGCAGCAAAAAGAACUUCAGA	experimental		gga-miR-1551-5p	mature miRNA	standard	MIMAT0007405	gga-miR-1551-5p
300	gga-miR-1552-3p	CUAGCUGCUCUGCACUGACUG	experimental		gga-miR-1552-3p	mature miRNA	standard	MIMAT0007408	gga-miR-1552-3p
301	gga-miR-1552-5p	UUAGUGCGCGGUAAGCUAGGGUG	experimental		gga-miR-1552-5p	mature miRNA	standard	MIMAT0007407	gga-miR-1552-5p
302	gga-miR-1553-3p	UGUGGUGGGAGGACAGUGAUGU	experimental		gga-miR-1553-3p	mature miRNA	standard	MIMAT0007410	gga-miR-1553-3p
303	gga-miR-1553-5p	AGUCCUGUCCUGUCUACCUACUGU	experimental		gga-miR-1553-5p	mature miRNA	standard	MIMAT0007409	gga-miR-1553-5p
304	gga-miR-1554	GCAGGUGAUGAGGCUUUGCUG	experimental		gga-miR-1554	mature miRNA	standard	MIMAT0007411	gga-miR-1554
305	gga-miR-1555-3p	CAGGGUUAUUGGUUUUGUGUGA	experimental		gga-miR-1555-3p	mature miRNA	standard	MIMAT0007412	gga-miR-1555-3p
306	gga-miR-1555-5p	AGCAAACCCUUCACCCUGCC	experimental		gga-miR-1555-5p	mature miRNA	standard	MIMAT0026774	gga-miR-1555-5p
307	gga-miR-1556	UGCAGGCUGGAAGUAGGAGUGU	experimental		gga-miR-1556	mature miRNA	standard	MIMAT0007413	gga-miR-1556
308	gga-miR-1557	CCCGUCGGCUGAGCGGCUGC	experimental		gga-miR-1557	mature miRNA	standard	MIMAT0007414	gga-miR-1557
309	gga-miR-1558	CUGCUGUGAUGGGAGCUCUG	experimental		gga-miR-1558	mature miRNA	standard	MIMAT0007415	gga-miR-1558
310	gga-miR-1559-3p	AGUUACAUGUAUGCAUCGAGCA	experimental		gga-miR-1559-3p	mature miRNA	standard	MIMAT0026775	gga-miR-1559-3p
311	gga-miR-1559-5p	UUCGAUGCUUGUAUGCUACUCC	experimental		gga-miR-1559-5p	mature miRNA	standard	MIMAT0007416	gga-miR-1559-5p
312	gga-miR-1560-3p	GCAUCUCUGGACGCGCUCGUUC	experimental		gga-miR-1560-3p	mature miRNA	standard	MIMAT0007418	gga-miR-1560-3p
313	gga-miR-1560-5p	GCGGCGCGAGCAGAGAGGCGCU	experimental		gga-miR-1560-5p	mature miRNA	standard	MIMAT0007417	gga-miR-1560-5p
314	gga-miR-1561	GCCGGGUUUGCGGCCGCUUUU	experimental		gga-miR-1561	mature miRNA	standard	MIMAT0007419	gga-miR-1561
315	gga-miR-1562-3p	UGUGCCCCGUGUAUGCAGUGCA	experimental		gga-miR-1562-3p	mature miRNA	standard	MIMAT0007421	gga-miR-1562-3p
316	gga-miR-1562-5p	GCACUGUAGAUGGAGGGGCUGC	experimental		gga-miR-1562-5p	mature miRNA	standard	MIMAT0007420	gga-miR-1562-5p
317	gga-miR-1563	GCACAUGAUGAGGAAGCACUGAAA	experimental		gga-miR-1563	mature miRNA	standard	MIMAT0007422	gga-miR-1563
318	gga-miR-1564-3p	CUCCUCUGCCGUGCUGGUUGUG	experimental		gga-miR-1564-3p	mature miRNA	standard	MIMAT0007424	gga-miR-1564-3p
319	gga-miR-1564-5p	GCAAUGAACACGGCAGUAGAGGU	experimental		gga-miR-1564-5p	mature miRNA	standard	MIMAT0007423	gga-miR-1564-5p
320	gga-miR-1565	CGAGGGUCGUGCCUGGUUUUGCU	experimental		gga-miR-1565	mature miRNA	standard	MIMAT0007425	gga-miR-1565
321	gga-miR-1567	GACUGCUCAUGGCUGCCUGUUC	experimental		gga-miR-1567	mature miRNA	standard	MIMAT0007427	gga-miR-1567
322	gga-miR-1568	GACUCAUAGAUCUGAAGGCAG	experimental		gga-miR-1568	mature miRNA	standard	MIMAT0007428	gga-miR-1568
323	gga-miR-1569	UGUUUGGGACGUUGCUCUGCAG	experimental		gga-miR-1569	mature miRNA	standard	MIMAT0007429	gga-miR-1569
324	gga-miR-1570	GAAGGGUGUGCAGAAGAAUGUGA	experimental		gga-miR-1570	mature miRNA	standard	MIMAT0007430	gga-miR-1570
325	gga-miR-1571	UGUUUCCUAUCCAGGCAGCACU	experimental		gga-miR-1571	mature miRNA	standard	MIMAT0007431	gga-miR-1571
326	gga-miR-1572	GAACCUGACACACGGGCCUGC	experimental		gga-miR-1572	mature miRNA	standard	MIMAT0007432	gga-miR-1572
327	gga-miR-1573	UGUUCUGCAGGUGCCAGUCU	experimental		gga-miR-1573	mature miRNA	standard	MIMAT0007433	gga-miR-1573
328	gga-miR-1574-3p	ACAGGAGGAUGUCAGGAAGCUU	experimental		gga-miR-1574-3p	mature miRNA	standard	MIMAT0007435	gga-miR-1574-3p
329	gga-miR-1574-5p	CUGUGACUUCUCCUUGUCAGA	experimental		gga-miR-1574-5p	mature miRNA	standard	MIMAT0007434	gga-miR-1574-5p
330	gga-miR-1575	CUGGCAGCACGUAGGAGCAGG	experimental		gga-miR-1575	mature miRNA	standard	MIMAT0007436	gga-miR-1575
331	gga-miR-1576	CUCGGGCGGGCGGAGCGGCAC	experimental		gga-miR-1576	mature miRNA	standard	MIMAT0007437	gga-miR-1576
332	gga-miR-1577	CUCAGGGGUGGAAGUAGGAGAA	experimental		gga-miR-1577	mature miRNA	standard	MIMAT0007438	gga-miR-1577
333	gga-miR-1578	UGUGCCGUUCUGACACAGCUCU	experimental		gga-miR-1578	mature miRNA	standard	MIMAT0007439	gga-miR-1578
334	gga-miR-1579	CGUGGCGGGAAGGGAUGGGCG	experimental		gga-miR-1579	mature miRNA	standard	MIMAT0007440	gga-miR-1579
335	gga-miR-1580	CGGCUUCUCGGUACCUGCGUU	experimental		gga-miR-1580	mature miRNA	standard	MIMAT0007441	gga-miR-1580
336	gga-miR-1581	CGAGCCGAAGGGGUGGGCGCUGC	experimental		gga-miR-1581	mature miRNA	standard	MIMAT0007442	gga-miR-1581
337	gga-miR-1582	GAAAGAGAGCCAGAACACAG	experimental		gga-miR-1582	mature miRNA	standard	MIMAT0007443	gga-miR-1582
338	gga-miR-1583	CGUAGGGCCGUGGGACGGCA	experimental		gga-miR-1583	mature miRNA	standard	MIMAT0007444	gga-miR-1583
339	gga-miR-1584	CCGGGUGGGGCUGGGCUGGG	experimental		gga-miR-1584	mature miRNA	standard	MIMAT0007445	gga-miR-1584
340	gga-miR-1585	AGUGCCCAGGUGUGGUUAAUCCUG	experimental		gga-miR-1585	mature miRNA	standard	MIMAT0007447	gga-miR-1585
341	gga-miR-1586	CAGUCAGCUGUGGGUGGGUGGCA	experimental		gga-miR-1586	mature miRNA	standard	MIMAT0007448	gga-miR-1586
342	gga-miR-1587	GGGCUGGGCUGGGCUGGGCA	experimental		gga-miR-1587	mature miRNA	standard	MIMAT0007449	gga-miR-1587
343	gga-miR-1588	CAGGAACCAGCUUUCGGCUCU	experimental		gga-miR-1588	mature miRNA	standard	MIMAT0007450	gga-miR-1588
344	gga-miR-1589	CAGCCUCUGCUGAUCGUCUUUU	experimental		gga-miR-1589	mature miRNA	standard	MIMAT0007451	gga-miR-1589
345	gga-miR-1590	AGGGACAAAUUGCUCUCUGGAAG	experimental		gga-miR-1590	mature miRNA	standard	MIMAT0007452	gga-miR-1590
346	gga-miR-1591-3p	CAGACUUGGCCAUGGGUAGGA	experimental		gga-miR-1591-3p	mature miRNA	standard	MIMAT0007454	gga-miR-1591-3p
347	gga-miR-1591-5p	UGAUUCAUUGCCUGGCUCUGC	experimental		gga-miR-1591-5p	mature miRNA	standard	MIMAT0007453	gga-miR-1591-5p
348	gga-miR-1592	CACUGCCUCAGACAACGGGUGU	experimental		gga-miR-1592	mature miRNA	standard	MIMAT0007455	gga-miR-1592
349	gga-miR-1593	ACCAUCUGAUUUGGACACGCA	experimental		gga-miR-1593	mature miRNA	standard	MIMAT0007456	gga-miR-1593
350	gga-miR-1594	UGGUGGGGAUGGGUUGGGGUU	experimental		gga-miR-1594	mature miRNA	standard	MIMAT0007457	gga-miR-1594
351	gga-miR-1595-3p	UAGCCCCGCUGUCCUACUGCUG	experimental		gga-miR-1595-3p	mature miRNA	standard	MIMAT0007459	gga-miR-1595-3p
352	gga-miR-1595-5p	AAGCACGAGUGUGGUGGAGCUC	experimental		gga-miR-1595-5p	mature miRNA	standard	MIMAT0007458	gga-miR-1595-5p
353	gga-miR-1596-3p	AAAGGUGGCCGUGGGUGAAUGA	experimental		gga-miR-1596-3p	mature miRNA	standard	MIMAT0007461	gga-miR-1596-3p
354	gga-miR-1596-5p	AUUCUCCUUCAAUCCAUCUUUGU	experimental		gga-miR-1596-5p	mature miRNA	standard	MIMAT0007460	gga-miR-1596-5p
355	gga-miR-1597-3p	UGAGGAGCUCUGCAAGCAUGCA	experimental		gga-miR-1597-3p	mature miRNA	standard	MIMAT0007463	gga-miR-1597-3p
356	gga-miR-1597-5p	AUGUUUACAGGGCUCUUCAUU	experimental		gga-miR-1597-5p	mature miRNA	standard	MIMAT0007462	gga-miR-1597-5p
357	gga-miR-1598	AUGGUAGCACGGCAAUGAGCAU	experimental		gga-miR-1598	mature miRNA	standard	MIMAT0007464	gga-miR-1598
358	gga-miR-1599	GGAGGGAGGAAAAAAAAAAA	experimental		gga-miR-1599	mature miRNA	standard	MIMAT0007465	gga-miR-1599
359	gga-miR-1600	UGGGCUGACAACAGAGGGCC	experimental		gga-miR-1600	mature miRNA	standard	MIMAT0007466	gga-miR-1600
360	gga-miR-1601	AGUGUGAGCAGGUGCAGAGCUG	experimental		gga-miR-1601	mature miRNA	standard	MIMAT0007467	gga-miR-1601
361	gga-miR-1602	UGGGCUCUGCAUCACCCCAUGG	experimental		gga-miR-1602	mature miRNA	standard	MIMAT0007468	gga-miR-1602
362	gga-miR-1603	AGUGGUUGGUUUGGUGCUGUC	experimental		gga-miR-1603	mature miRNA	standard	MIMAT0007469	gga-miR-1603
363	gga-miR-1604	UGGGCCCAGGGCUGUGCUGGAGA	experimental		gga-miR-1604	mature miRNA	standard	MIMAT0007470	gga-miR-1604
364	gga-miR-1605	AGGGUUUCAUGUGUAUCUCUUG	experimental		gga-miR-1605	mature miRNA	standard	MIMAT0007471	gga-miR-1605
365	gga-miR-1606	AGGGGGCAACAGAACAGUCCUGA	experimental		gga-miR-1606	mature miRNA	standard	MIMAT0007472	gga-miR-1606
366	gga-miR-1607	AGGGGCGGGAGGGGUCGGGC	experimental		gga-miR-1607	mature miRNA	standard	MIMAT0007473	gga-miR-1607
367	gga-miR-1608	UGGGACAGUGGCUGCGCCCUCU	experimental		gga-miR-1608	mature miRNA	standard	MIMAT0007474	gga-miR-1608
368	gga-miR-1609	AGGCUGAGGCUGUGCUGGUUGU	experimental		gga-miR-1609	mature miRNA	standard	MIMAT0007475	gga-miR-1609
369	gga-miR-1610	UGGCUUGUGGUGGAACGGGCG	experimental		gga-miR-1610	mature miRNA	standard	MIMAT0007476	gga-miR-1610
370	gga-miR-1611	GGAGGGCUUGCAGGCGGUGUGC	experimental		gga-miR-1611	mature miRNA	standard	MIMAT0007477	gga-miR-1611
371	gga-miR-1612	GAAGGAAAAGGAGCUGACUGGG	experimental		gga-miR-1612	mature miRNA	standard	MIMAT0007478	gga-miR-1612
372	gga-miR-1613	UACAUGCGUAUAUUCUGGCAG	experimental		gga-miR-1613	mature miRNA	standard	MIMAT0007479	gga-miR-1613
373	gga-miR-1614-3p	CAGGGAGGAACUGCCAGCAGA	experimental		gga-miR-1614-3p	mature miRNA	standard	MIMAT0007481	gga-miR-1614-3p
374	gga-miR-1614-5p	GGCAUGGCAGACUCACCCUGC	experimental		gga-miR-1614-5p	mature miRNA	standard	MIMAT0007480	gga-miR-1614-5p
375	gga-miR-1615	UGGCAGCUGCACAGAAGCCCUUU	experimental		gga-miR-1615	mature miRNA	standard	MIMAT0007482	gga-miR-1615
376	gga-miR-1616	UGGAUCCUGCAGUUUGCUUUCA	experimental		gga-miR-1616	mature miRNA	standard	MIMAT0007483	gga-miR-1616
377	gga-miR-1617	AGAGGCCUUCAGAUACUGUUUU	experimental		gga-miR-1617	mature miRNA	standard	MIMAT0007484	gga-miR-1617
378	gga-miR-1618-3p	GAGCCCGGAGCCAGGCUGCUGU	experimental		gga-miR-1618-3p	mature miRNA	standard	MIMAT0007485	gga-miR-1618-3p
379	gga-miR-1618-5p	UGCAUCCUGGCUCCUGGCGUCC	experimental		gga-miR-1618-5p	mature miRNA	standard	MIMAT0026776	gga-miR-1618-5p
380	gga-miR-1619	AGAAUUCAUAGCAAUACGGACU	experimental		gga-miR-1619	mature miRNA	standard	MIMAT0007486	gga-miR-1619
381	gga-miR-1620	ACUUUAAUGGGCUUUGGAUCAC	experimental		gga-miR-1620	mature miRNA	standard	MIMAT0007487	gga-miR-1620
382	gga-miR-1621-3p	GGUUCGCCGUGCCGCCGCGC	experimental		gga-miR-1621-3p	mature miRNA	standard	MIMAT0007489	gga-miR-1621-3p
383	gga-miR-1621-5p	ACCGGCUGCCUCGGUGGCAC	experimental		gga-miR-1621-5p	mature miRNA	standard	MIMAT0007488	gga-miR-1621-5p
384	gga-miR-1622	CACAUAUGAUGAGUACUGAUG	experimental		gga-miR-1622	mature miRNA	standard	MIMAT0007490	gga-miR-1622
385	gga-miR-1623	GCAGGCACAGACAGGCAGUA	experimental		gga-miR-1623	mature miRNA	standard	MIMAT0007491	gga-miR-1623
386	gga-miR-1624	ACACCGCACUGGCAGGGAGCA	experimental		gga-miR-1624	mature miRNA	standard	MIMAT0007492	gga-miR-1624
387	gga-miR-1625-3p	GCAGCAGAAUAUCCCUGCCAUU	experimental		gga-miR-1625-3p	mature miRNA	standard	MIMAT0007494	gga-miR-1625-3p
388	gga-miR-1625-5p	UGGACCAGGGCUCUUCCUGCUGGCU	experimental		gga-miR-1625-5p	mature miRNA	standard	MIMAT0007493	gga-miR-1625-5p
389	gga-miR-1626-3p	UCUGGAAGUUGCCCUGGACGUG	experimental		gga-miR-1626-3p	mature miRNA	standard	MIMAT0007496	gga-miR-1626-3p
390	gga-miR-1626-5p	UUUCCAUGGCAGACUUUCUAGGCU	experimental		gga-miR-1626-5p	mature miRNA	standard	MIMAT0007495	gga-miR-1626-5p
391	gga-miR-1627-3p	CAGCCACGCUACUGUCACUGGU	experimental		gga-miR-1627-3p	mature miRNA	standard	MIMAT0007498	gga-miR-1627-3p
392	gga-miR-1627-5p	GAAGUGACAUGUGGUUGAUGG	experimental		gga-miR-1627-5p	mature miRNA	standard	MIMAT0007497	gga-miR-1627-5p
393	gga-miR-1628	AAGAGCUCUUCCUGUUGUGACC	experimental		gga-miR-1628	mature miRNA	standard	MIMAT0007499	gga-miR-1628
394	gga-miR-1629	UGCUGUCGGUGGGUUUGUUCU	experimental		gga-miR-1629	mature miRNA	standard	MIMAT0007500	gga-miR-1629
395	gga-miR-1630	AAAGAGGAAACUGAAGCUGAAA	experimental		gga-miR-1630	mature miRNA	standard	MIMAT0007501	gga-miR-1630
396	gga-miR-1631	AAACUGGCGACGUGGGACGGUC	experimental		gga-miR-1631	mature miRNA	standard	MIMAT0007502	gga-miR-1631
397	gga-miR-1632-3p	AACUCAUUCAUUAACCAGCUUUU	experimental		gga-miR-1632-3p	mature miRNA	standard	MIMAT0007505	gga-miR-1632-3p
398	gga-miR-1632-5p	UGCUUGUUUUUGGAUGAGCUUGC	experimental		gga-miR-1632-5p	mature miRNA	standard	MIMAT0007504	gga-miR-1632-5p
399	gga-miR-1633	UGCGCUUCUGCUCAGCUCGGUGU	experimental		gga-miR-1633	mature miRNA	standard	MIMAT0007506	gga-miR-1633
400	gga-miR-1634	UGCGACGCAUCGGCCUUUCUUC	experimental		gga-miR-1634	mature miRNA	standard	MIMAT0007507	gga-miR-1634
401	gga-miR-1635	UGCCCAGGCUGUGCUGUGCUCUGGG	experimental		gga-miR-1635	mature miRNA	standard	MIMAT0007508	gga-miR-1635
402	gga-miR-1636	UGCAGGUGAUGGCGGGGCUG	experimental		gga-miR-1636	mature miRNA	standard	MIMAT0007509	gga-miR-1636
403	gga-miR-1637	UGAUAGCUGCUGUGGCACGGA	experimental		gga-miR-1637	mature miRNA	standard	MIMAT0007510	gga-miR-1637
404	gga-miR-1638	GUAGUUUGUGUUGUUUGUUU	experimental		gga-miR-1638	mature miRNA	standard	MIMAT0007511	gga-miR-1638
405	gga-miR-1639	UUGUGCAAGGUACGUUGGGUU	experimental		gga-miR-1639	mature miRNA	standard	MIMAT0007514	gga-miR-1639
406	gga-miR-1640	UUGUCACUGCAGGGCCCCGCGGCC	experimental		gga-miR-1640	mature miRNA	standard	MIMAT0007515	gga-miR-1640
407	gga-miR-1641	UGAGGAUUAAUGACUGUCUGGG	experimental		gga-miR-1641	mature miRNA	standard	MIMAT0007516	gga-miR-1641
408	gga-miR-1642	UGAGAGGCUGUCAGUUUGUGGGG	experimental		gga-miR-1642	mature miRNA	standard	MIMAT0007517	gga-miR-1642
409	gga-miR-1643-3p	UAAAAGUGCUGCUGGUGGAAGAA	experimental		gga-miR-1643-3p	mature miRNA	standard	MIMAT0007519	gga-miR-1643-3p
410	gga-miR-1643-5p	UCUUAUCACGAGGAGCACUUUU	experimental		gga-miR-1643-5p	mature miRNA	standard	MIMAT0007518	gga-miR-1643-5p
411	gga-miR-1644	UCUGUUGUGCAGGGCUGUGCU	experimental		gga-miR-1644	mature miRNA	standard	MIMAT0007520	gga-miR-1644
412	gga-miR-1645	UCUGCUGAAGUACUGUCAGA	experimental		gga-miR-1645	mature miRNA	standard	MIMAT0007521	gga-miR-1645
413	gga-miR-1646	UCUGCCCUGCAGCACUGAGAUCU	experimental		gga-miR-1646	mature miRNA	standard	MIMAT0007522	gga-miR-1646
414	gga-miR-1647	UCUCUGCCUGAGGGGUACUCU	experimental		gga-miR-1647	mature miRNA	standard	MIMAT0007523	gga-miR-1647
415	gga-miR-1648-3p	UGGGAGUGGAGCGGAGCUGUC	experimental		gga-miR-1648-3p	mature miRNA	standard	MIMAT0007525	gga-miR-1648-3p
416	gga-miR-1648-5p	CGGCUCGGCUCGGCUCCGCUC	experimental		gga-miR-1648-5p	mature miRNA	standard	MIMAT0007524	gga-miR-1648-5p
417	gga-miR-1649-3p	CUCCGUGCACUCUGCAGGCA	experimental		gga-miR-1649-3p	mature miRNA	standard	MIMAT0007527	gga-miR-1649-3p
418	gga-miR-1649-5p	UCCUGCAGAAGGUGCGGCUG	experimental		gga-miR-1649-5p	mature miRNA	standard	MIMAT0007526	gga-miR-1649-5p
419	gga-miR-1650	UCCUCUGAGCUCAGCUUCGCCUCU	experimental		gga-miR-1650	mature miRNA	standard	MIMAT0007528	gga-miR-1650
420	gga-miR-1651-3p	UUGCUUUUGUUGGCCUCUGCUG	experimental		gga-miR-1651-3p	mature miRNA	standard	MIMAT0007530	gga-miR-1651-3p
421	gga-miR-1651-5p	GCUAAGACUGAUAAAAGCAAGC	experimental		gga-miR-1651-5p	mature miRNA	standard	MIMAT0007529	gga-miR-1651-5p
422	gga-miR-1652	UCCCUGUGUCCCCUCGGUGGCA	experimental		gga-miR-1652	mature miRNA	standard	MIMAT0007531	gga-miR-1652
423	gga-miR-1653	CAGGAGCUGUGCUGCAUGCAGG	experimental		gga-miR-1653	mature miRNA	standard	MIMAT0007532	gga-miR-1653
424	gga-miR-1654	UUGCUGGUGGAGGGAGCUGAG	experimental		gga-miR-1654	mature miRNA	standard	MIMAT0007533	gga-miR-1654
425	gga-miR-1655-3p	AUUUACCCAUGGUGGGCUGAUA	experimental		gga-miR-1655-3p	mature miRNA	standard	MIMAT0026777	gga-miR-1655-3p
426	gga-miR-1655-5p	UCAGCUGGUCUUGGGUAAAUGC	experimental		gga-miR-1655-5p	mature miRNA	standard	MIMAT0007534	gga-miR-1655-5p
427	gga-miR-1656	UCACCAGCGGGCAUUGGCAUCA	experimental		gga-miR-1656	mature miRNA	standard	MIMAT0007535	gga-miR-1656
428	gga-miR-1657	UAUAUGUGUAUUGUUGGUGUGUG	experimental		gga-miR-1657	mature miRNA	standard	MIMAT0007537	gga-miR-1657
429	gga-miR-1658-3p	GAGCUGUGGGUUGGUGUUGAUGG	experimental		gga-miR-1658-3p	mature miRNA	standard	MIMAT0007539	gga-miR-1658-3p
430	gga-miR-1658-5p	UAUACCACCCCCAGGAGUUCUGC	experimental		gga-miR-1658-5p	mature miRNA	standard	MIMAT0007538	gga-miR-1658-5p
431	gga-miR-1659	UAGGGCAGAAUGAAGGAGUCCCU	experimental		gga-miR-1659	mature miRNA	standard	MIMAT0007540	gga-miR-1659
432	gga-miR-1660	UAGGCCUGUGUUUUUGUGCAUA	experimental		gga-miR-1660	mature miRNA	standard	MIMAT0007541	gga-miR-1660
433	gga-miR-1661	UAGCAGAUGUUUAGGAAUGUGCCU	experimental		gga-miR-1661	mature miRNA	standard	MIMAT0007542	gga-miR-1661
434	gga-miR-1662	UUGACAUCAUCAUACUUGGGAU	experimental		gga-miR-1662	mature miRNA	standard	MIMAT0007543	gga-miR-1662
435	gga-miR-1663-3p	UGGCAUCCAGAACAGCGGUAC	experimental		gga-miR-1663-3p	mature miRNA	standard	MIMAT0007545	gga-miR-1663-3p
436	gga-miR-1663-5p	UACCACUGUCCUGGGUGCCU	experimental		gga-miR-1663-5p	mature miRNA	standard	MIMAT0007544	gga-miR-1663-5p
437	gga-miR-1664-3p	UCUGUGACCUCAUUUACCUCC	experimental		gga-miR-1664-3p	mature miRNA	standard	MIMAT0007547	gga-miR-1664-3p
438	gga-miR-1664-5p	CCAGACAGGGAGAGAACAGG	experimental		gga-miR-1664-5p	mature miRNA	standard	MIMAT0007546	gga-miR-1664-5p
439	gga-miR-1665	UAAGGCCCAGGAGCGCUGCAGC	experimental		gga-miR-1665	mature miRNA	standard	MIMAT0007548	gga-miR-1665
440	gga-miR-1666	UAACGCCACGGGGCUGAGGCUG	experimental		gga-miR-1666	mature miRNA	standard	MIMAT0007549	gga-miR-1666
441	gga-miR-1667-3p	UAACAUGAUGUCAGGAUUUCCC	experimental		gga-miR-1667-3p	mature miRNA	standard	MIMAT0007550	gga-miR-1667-3p
442	gga-miR-1667-5p	GAGAUUCUGACACAAUGUUUAGA	experimental		gga-miR-1667-5p	mature miRNA	standard	MIMAT0026778	gga-miR-1667-5p
443	gga-miR-1668-3p	UGCUGUGUCCUCACUCACCUU	experimental		gga-miR-1668-3p	mature miRNA	standard	MIMAT0007552	gga-miR-1668-3p
444	gga-miR-1668-5p	GUGGGCUGGGAGCACAGGCACU	experimental		gga-miR-1668-5p	mature miRNA	standard	MIMAT0007551	gga-miR-1668-5p
445	gga-miR-1669	GUGGGCUCAGAGCAGGCACA	experimental		gga-miR-1669	mature miRNA	standard	MIMAT0007553	gga-miR-1669
446	gga-miR-1670	GUGGGACGUAGCCUCACAGUGG	experimental		gga-miR-1670	mature miRNA	standard	MIMAT0007554	gga-miR-1670
447	gga-miR-1671	GUGAGGACUGUUGAGUGGCCAAA	experimental		gga-miR-1671	mature miRNA	standard	MIMAT0007555	gga-miR-1671
448	gga-miR-1672	GUCAGGCCAGGAAGGGAUGUGAGG	experimental		gga-miR-1672	mature miRNA	standard	MIMAT0007556	gga-miR-1672
449	gga-miR-1673	GGUGUGAGUGGAAGUCAGAGGU	experimental		gga-miR-1673	mature miRNA	standard	MIMAT0007557	gga-miR-1673
450	gga-miR-1674	GGGCUAUGAUGCUGGAUUUUCUGAG	experimental		gga-miR-1674	mature miRNA	standard	MIMAT0007558	gga-miR-1674
451	gga-miR-1675	GGACGCCAUCUUGACUGUGGGCAG	experimental		gga-miR-1675	mature miRNA	standard	MIMAT0007559	gga-miR-1675
452	gga-miR-1676-3p	AGAGCGAAGUGGGUGGGAAUGU	experimental		gga-miR-1676-3p	mature miRNA	standard	MIMAT0007561	gga-miR-1676-3p
453	gga-miR-1676-5p	CCUGACUCAUCCCCUUUGCUCC	experimental		gga-miR-1676-5p	mature miRNA	standard	MIMAT0007560	gga-miR-1676-5p
454	gga-miR-1677-3p	UGACUUCAGUAGGAGCAGGAUU	experimental		gga-miR-1677-3p	mature miRNA	standard	MIMAT0007563	gga-miR-1677-3p
455	gga-miR-1677-5p	UCCUGCACCGCUGAAGUCAAU	experimental		gga-miR-1677-5p	mature miRNA	standard	MIMAT0007562	gga-miR-1677-5p
456	gga-miR-1678	UUUGACAAAGACAGAAGGAGCU	experimental		gga-miR-1678	mature miRNA	standard	MIMAT0007564	gga-miR-1678
457	gga-miR-1679	UUGUCAGCACAGUGGUAUAUGCA	experimental		gga-miR-1679	mature miRNA	standard	MIMAT0007565	gga-miR-1679
458	gga-miR-1680-3p	CAGGCGGUAUCAGGAGGCUGA	experimental		gga-miR-1680-3p	mature miRNA	standard	MIMAT0007567	gga-miR-1680-3p
459	gga-miR-1680-5p	UUCCUCCUGGGUACAACUCUGC	experimental		gga-miR-1680-5p	mature miRNA	standard	MIMAT0007566	gga-miR-1680-5p
460	gga-miR-1681	UUCACAUGAUGUCUUGCUGAUG	experimental		gga-miR-1681	mature miRNA	standard	MIMAT0007568	gga-miR-1681
461	gga-miR-1682	UGGGUCAGAUGGAGCUGAGGG	experimental		gga-miR-1682	mature miRNA	standard	MIMAT0007569	gga-miR-1682
462	gga-miR-1683	UCUGGGACAGUCACAGCAUCUUU	experimental		gga-miR-1683	mature miRNA	standard	MIMAT0007570	gga-miR-1683
463	gga-miR-1684a-3p	AAGUAUGAGGAAAUGGAGCUCU	experimental		gga-miR-1684a-3p	mature miRNA	standard	MIMAT0007572	gga-miR-1684a-3p
464	gga-miR-1684a-5p	AGCUCUGCUUCCUCAUACAUAC	experimental		gga-miR-1684a-5p	mature miRNA	standard	MIMAT0007571	gga-miR-1684a-5p
465	gga-miR-1684b-3p	AAGUAUGAGGAAAUGGAGAUCU	experimental		gga-miR-1684b-3p	mature miRNA	standard	MIMAT0025785	gga-miR-1684b-3p
466	gga-miR-1685-3p	ACAGUAAUGGUAUGAACUCAGA	experimental		gga-miR-1685-3p	mature miRNA	standard	MIMAT0007574	gga-miR-1685-3p
467	gga-miR-1685-5p	UGGAGUCACUACCAGUGCUGUG	experimental		gga-miR-1685-5p	mature miRNA	standard	MIMAT0007573	gga-miR-1685-5p
468	gga-miR-1686	UGGAGGCUGUGCGUCAUCCCCA	experimental		gga-miR-1686	mature miRNA	standard	MIMAT0007575	gga-miR-1686
469	gga-miR-1687-3p	UUGCUGGCUGUUUCUCAGUGA	experimental		gga-miR-1687-3p	mature miRNA	standard	MIMAT0007577	gga-miR-1687-3p
470	gga-miR-1687-5p	UGAGGAAAUGAGCCAGCUGAG	experimental		gga-miR-1687-5p	mature miRNA	standard	MIMAT0007576	gga-miR-1687-5p
471	gga-miR-1688	UGAGCAUGGUAGAGACAAUGAUG	experimental		gga-miR-1688	mature miRNA	standard	MIMAT0007578	gga-miR-1688
472	gga-miR-1689-3p	CCGGUGACUGGAAGCAGCGUUGA	experimental		gga-miR-1689-3p	mature miRNA	standard	MIMAT0007580	gga-miR-1689-3p
473	gga-miR-1689-5p	UCUCUGCUUACAGUGUCUGGGG	experimental		gga-miR-1689-5p	mature miRNA	standard	MIMAT0007579	gga-miR-1689-5p
474	gga-miR-1690-5p	UCCAGAGGCAAAGGAGCACUGCU	experimental		gga-miR-1690-5p	mature miRNA	standard	MIMAT0007581	gga-miR-1690-5p
475	gga-miR-1691	UCAGCUGACCUGGGCCUGCAGUG	experimental		gga-miR-1691	mature miRNA	standard	MIMAT0007582	gga-miR-1691
476	gga-miR-1692	UGUAGCUCAGUUGGUAGAGU	experimental		gga-miR-1692	mature miRNA	standard	MIMAT0007584	gga-miR-1692
477	gga-miR-1693	GCAAAGGAUGAAGCUGUGAUG	experimental		gga-miR-1693	mature miRNA	standard	MIMAT0007585	gga-miR-1693
478	gga-miR-1694	GGAGGACGAGGCUGCGAGCGGA	experimental		gga-miR-1694	mature miRNA	standard	MIMAT0007586	gga-miR-1694
479	gga-miR-1695	GAGCACAGUUUGGUCAUGGAGC	experimental		gga-miR-1695	mature miRNA	standard	MIMAT0007587	gga-miR-1695
480	gga-miR-1696	CUGCUGUGAUGUGAGCUGAGCAUC	experimental		gga-miR-1696	mature miRNA	standard	MIMAT0007588	gga-miR-1696
481	gga-miR-1697	CUCUCAUGGGACUGUGUGCAGC	experimental		gga-miR-1697	mature miRNA	standard	MIMAT0007589	gga-miR-1697
482	gga-miR-1698	CGAGGCUGCGGCAAUCCCUGCG	experimental		gga-miR-1698	mature miRNA	standard	MIMAT0007590	gga-miR-1698
483	gga-miR-1699	CCAGAGGGACAUGGCAGGGCAA	experimental		gga-miR-1699	mature miRNA	standard	MIMAT0007591	gga-miR-1699
484	gga-miR-1700	CAUCAGAGGGAUAGGAUGGAC	experimental		gga-miR-1700	mature miRNA	standard	MIMAT0007592	gga-miR-1700
485	gga-miR-1701	GGCUGGUUAGUUGGUUGUUU	experimental		gga-miR-1701	mature miRNA	standard	MIMAT0007593	gga-miR-1701
486	gga-miR-1702	AUUGCAUUCAGAGCGAGCUGU	experimental		gga-miR-1702	mature miRNA	standard	MIMAT0007594	gga-miR-1702
487	gga-miR-1703-3p	CUCGUGACUUCAGCUCCAGCA	experimental		gga-miR-1703-3p	mature miRNA	standard	MIMAT0026779	gga-miR-1703-3p
488	gga-miR-1703-5p	AGAGGCUGUAGGUCCCGUGCUUU	experimental		gga-miR-1703-5p	mature miRNA	standard	MIMAT0007595	gga-miR-1703-5p
489	gga-miR-1704	ACAGCAGAUUGAUGGGGCACA	experimental		gga-miR-1704	mature miRNA	standard	MIMAT0007596	gga-miR-1704
490	gga-miR-1705	AAUCUGGAAGUCAGCACAUGCU	experimental		gga-miR-1705	mature miRNA	standard	MIMAT0007597	gga-miR-1705
491	gga-miR-1706	UGUGGAGGUGGGAUGAGGUUCC	experimental		gga-miR-1706	mature miRNA	standard	MIMAT0007598	gga-miR-1706
492	gga-miR-1707	UUUGAGCGGGAUCUGUUAUCGUG	experimental		gga-miR-1707	mature miRNA	standard	MIMAT0007599	gga-miR-1707
493	gga-miR-1708	UGGGGUGUGGAAUGAAUCCUU	experimental		gga-miR-1708	mature miRNA	standard	MIMAT0007601	gga-miR-1708
494	gga-miR-1709	UGGAAUGAUGAGUGCACUGACU	experimental		gga-miR-1709	mature miRNA	standard	MIMAT0007604	gga-miR-1709
495	gga-miR-1710	UCAUCUGCUGCAUAACCAUCCA	experimental		gga-miR-1710	mature miRNA	standard	MIMAT0007605	gga-miR-1710
496	gga-miR-1711	GUGCAGUGCUGCAUCUCUUC	experimental		gga-miR-1711	mature miRNA	standard	MIMAT0007606	gga-miR-1711
497	gga-miR-1712-3p	UUCAGUUAUCAGUGGAGUUUGG	experimental		gga-miR-1712-3p	mature miRNA	standard	MIMAT0007608	gga-miR-1712-3p
498	gga-miR-1712-5p	GGCUCCAGUCUUAACUACAGGC	experimental		gga-miR-1712-5p	mature miRNA	standard	MIMAT0007607	gga-miR-1712-5p
499	gga-miR-1713	CUCGGAGAGGGAAGAACGCGGUG	experimental		gga-miR-1713	mature miRNA	standard	MIMAT0007609	gga-miR-1713
500	gga-miR-1714	CCUAGUAGGGCUGCUGAGGUGAU	experimental		gga-miR-1714	mature miRNA	standard	MIMAT0007610	gga-miR-1714
501	gga-miR-1715-3p	UGACACUGCGGGUACCUCUUU	experimental		gga-miR-1715-3p	mature miRNA	standard	MIMAT0007612	gga-miR-1715-3p
502	gga-miR-1715-5p	AGGAUCAGUAGAAGUCAGCUGUGC	experimental		gga-miR-1715-5p	mature miRNA	standard	MIMAT0007611	gga-miR-1715-5p
503	gga-miR-1716	AGCGGGGCGGCUGUGAGCUGAGCU	experimental		gga-miR-1716	mature miRNA	standard	MIMAT0007613	gga-miR-1716
504	gga-miR-1717	ACUCUCUAACCUGACAGAAAACU	experimental		gga-miR-1717	mature miRNA	standard	MIMAT0007614	gga-miR-1717
505	gga-miR-1718	ACUAAGGACAGAGGAACGGAG	experimental		gga-miR-1718	mature miRNA	standard	MIMAT0007615	gga-miR-1718
506	gga-miR-1719	AAAGAUGAUGAGUUGCUGAUG	experimental		gga-miR-1719	mature miRNA	standard	MIMAT0007616	gga-miR-1719
507	gga-miR-1720-3p	AAGCAACGAGAGGUCGGUCUGA	experimental		gga-miR-1720-3p	mature miRNA	standard	MIMAT0007618	gga-miR-1720-3p
508	gga-miR-1720-5p	UGAUCACCUCGGACGUUGCUUU	experimental		gga-miR-1720-5p	mature miRNA	standard	MIMAT0007617	gga-miR-1720-5p
509	gga-miR-1721	AGAGAUGAUGUUGGUCUGAUG	experimental		gga-miR-1721	mature miRNA	standard	MIMAT0007619	gga-miR-1721
510	gga-miR-1722-3p	UAGAGCAUCACCAAGGGGCAAG	experimental		gga-miR-1722-3p	mature miRNA	standard	MIMAT0007621	gga-miR-1722-3p
511	gga-miR-1722-5p	UGUCACCCUAAGACUGCUCUAAU	experimental		gga-miR-1722-5p	mature miRNA	standard	MIMAT0007620	gga-miR-1722-5p
512	gga-miR-1723	UGGGAGCGGAAUGUGCAGCCUCA	experimental		gga-miR-1723	mature miRNA	standard	MIMAT0007622	gga-miR-1723
513	gga-miR-1724	UGCUGAGCGUUGGCUGCGCUGCG	experimental		gga-miR-1724	mature miRNA	standard	MIMAT0007623	gga-miR-1724
514	gga-miR-1725	UAUGAUAUAGUUAGAGCUGCU	experimental		gga-miR-1725	mature miRNA	standard	MIMAT0007624	gga-miR-1725
515	gga-miR-1726	AAGCUUGUUGGGUUUGGUUUGU	experimental		gga-miR-1726	mature miRNA	standard	MIMAT0007625	gga-miR-1726
516	gga-miR-1727	AAGCUGCUCUAAUGAACUGAAGG	experimental		gga-miR-1727	mature miRNA	standard	MIMAT0007626	gga-miR-1727
517	gga-miR-1728-3p	AGGCUUCUGUAGAUCAGCCAGC	experimental		gga-miR-1728-3p	mature miRNA	standard	MIMAT0007628	gga-miR-1728-3p
518	gga-miR-1728-5p	UGGUUGAUCCAUUGGAAGACUGA	experimental		gga-miR-1728-5p	mature miRNA	standard	MIMAT0007627	gga-miR-1728-5p
519	gga-miR-1729-3p	CUACUCGGUGAGUAAGGAUAGC	experimental		gga-miR-1729-3p	mature miRNA	standard	MIMAT0007630	gga-miR-1729-3p
520	gga-miR-1729-5p	AUCCCUUACUCACAUGAGUAGUC	experimental		gga-miR-1729-5p	mature miRNA	standard	MIMAT0007629	gga-miR-1729-5p
521	gga-miR-1730-3p	AAGGCCAUGGCUGUUUGCUGCU	experimental		gga-miR-1730-3p	mature miRNA	standard	MIMAT0007632	gga-miR-1730-3p
522	gga-miR-1730-5p	CAGCUAACAGAGGUGGAACCUUG	experimental		gga-miR-1730-5p	mature miRNA	standard	MIMAT0007631	gga-miR-1730-5p
523	gga-miR-1731-3p	UGGCAGUUCCUUGGUCUUGUCC	experimental		gga-miR-1731-3p	mature miRNA	standard	MIMAT0026780	gga-miR-1731-3p
524	gga-miR-1731-5p	ACUUGACUGCAGGCACUGCUGCU	experimental		gga-miR-1731-5p	mature miRNA	standard	MIMAT0007633	gga-miR-1731-5p
525	gga-miR-1732	CACCGUGCUGCUGUCGGGCUG	experimental		gga-miR-1732	mature miRNA	standard	MIMAT0007634	gga-miR-1732
526	gga-miR-1733	CUGGAUGGCUGUGAAUUGUCU	experimental		gga-miR-1733	mature miRNA	standard	MIMAT0007635	gga-miR-1733
527	gga-miR-1734	AUAUGCCCCAAUGUAUAAGCU	experimental		gga-miR-1734	mature miRNA	standard	MIMAT0007636	gga-miR-1734
528	gga-miR-1735	AGGGGCUUUGGGCAGCAUCUG	experimental		gga-miR-1735	mature miRNA	standard	MIMAT0007637	gga-miR-1735
529	gga-miR-1736-3p	AGCACCUUCGGAACUGUCCUCA	experimental		gga-miR-1736-3p	mature miRNA	standard	MIMAT0007639	gga-miR-1736-3p
530	gga-miR-1736-5p	AGGGCAAUUCCUGAUAGGUGCU	experimental		gga-miR-1736-5p	mature miRNA	standard	MIMAT0007638	gga-miR-1736-5p
531	gga-miR-1737	CAGCACUGCUGCGCUCGGUG	experimental		gga-miR-1737	mature miRNA	standard	MIMAT0007640	gga-miR-1737
532	gga-miR-1738	ACUGACUGCUCAGAGGGAUUGG	experimental		gga-miR-1738	mature miRNA	standard	MIMAT0007641	gga-miR-1738
533	gga-miR-1739	CACAGGACAGGUAGCCAGGCUGG	experimental		gga-miR-1739	mature miRNA	standard	MIMAT0007642	gga-miR-1739
534	gga-miR-1740-3p	UCAUCCAAUUAAACCACAAA	experimental		gga-miR-1740-3p	mature miRNA	standard	MIMAT0007644	gga-miR-1740-3p
535	gga-miR-1740-5p	UGUAGUUUAAGAGGAUAGGUCUU	experimental		gga-miR-1740-5p	mature miRNA	standard	MIMAT0007643	gga-miR-1740-5p
536	gga-miR-1741	AUGGCUCUGGAUUACACCUU	experimental		gga-miR-1741	mature miRNA	standard	MIMAT0007645	gga-miR-1741
537	gga-miR-1742	AAUCGUCGUUCGGGAUCCGC	experimental		gga-miR-1742	mature miRNA	standard	MIMAT0007646	gga-miR-1742
538	gga-miR-1743	UGGAAUGCAGCAAUUAUCACCU	experimental		gga-miR-1743	mature miRNA	standard	MIMAT0007647	gga-miR-1743
539	gga-miR-1744-3p	ACUUCAACAGGAGCAAGACUGA	experimental		gga-miR-1744-3p	mature miRNA	standard	MIMAT0007649	gga-miR-1744-3p
540	gga-miR-1744-5p	UGCUCUGUUGAACUCAAAAGCU	experimental		gga-miR-1744-5p	mature miRNA	standard	MIMAT0007648	gga-miR-1744-5p
541	gga-miR-1745	UGCUCUGCUUGGCAAACUGCUC	experimental		gga-miR-1745	mature miRNA	standard	MIMAT0007650	gga-miR-1745
542	gga-miR-1746	CUCAGAGCUGUGGUCCCAUGGU	experimental		gga-miR-1746	mature miRNA	standard	MIMAT0007651	gga-miR-1746
543	gga-miR-1747-3p	CCUGAAUCCCUUCAAGUGGACA	experimental		gga-miR-1747-3p	mature miRNA	standard	MIMAT0026781	gga-miR-1747-3p
544	gga-miR-1747-5p	UGCACUUGAAUGGAGUUCUGGG	experimental		gga-miR-1747-5p	mature miRNA	standard	MIMAT0007652	gga-miR-1747-5p
545	gga-miR-1748	ACUGAGGUCUGGGUGCAGCUGA	experimental		gga-miR-1748	mature miRNA	standard	MIMAT0007653	gga-miR-1748
546	gga-miR-1749-3p	UUGGCUCUGUUCCCUAUUUCC	experimental		gga-miR-1749-3p	mature miRNA	standard	MIMAT0007655	gga-miR-1749-3p
547	gga-miR-1749-5p	AGAUAAGGAACUGAACUGGCU	experimental		gga-miR-1749-5p	mature miRNA	standard	MIMAT0007654	gga-miR-1749-5p
548	gga-miR-1750	UGAGGACCAAGUGCAUCACUGC	experimental		gga-miR-1750	mature miRNA	standard	MIMAT0007657	gga-miR-1750
549	gga-miR-1751-5p	UGAGCUGCUCUGUUCCUGCAUCC	experimental		gga-miR-1751-5p	mature miRNA	standard	MIMAT0007658	gga-miR-1751-5p
550	gga-miR-1752	UUCUGUUGGAGAGAAGAGACA	experimental		gga-miR-1752	mature miRNA	standard	MIMAT0007659	gga-miR-1752
551	gga-miR-1753	GUGAAAUCCGGGUGAAGGCUGU	experimental		gga-miR-1753	mature miRNA	standard	MIMAT0007660	gga-miR-1753
552	gga-miR-1754-3p	AGGGCAGCUCACAGCACGGGG	experimental		gga-miR-1754-3p	mature miRNA	standard	MIMAT0026782	gga-miR-1754-3p
553	gga-miR-1754-5p	UCGUGCUGGAGCUGUUCUGG	experimental		gga-miR-1754-5p	mature miRNA	standard	MIMAT0007661	gga-miR-1754-5p
554	gga-miR-1755	UCGGUGAAUGGCUUGGCAUG	experimental		gga-miR-1755	mature miRNA	standard	MIMAT0007662	gga-miR-1755
555	gga-miR-1756a	UCCAGUGAUUCACACCAGCUGU	experimental		gga-miR-1756a	mature miRNA	standard	MIMAT0007663	gga-miR-1756a
556	gga-miR-1756b	UUCUCUGAUUUACACUAGCUGAG	experimental		gga-miR-1756b	mature miRNA	standard	MIMAT0007712	gga-miR-1756b
557	gga-miR-1757	UCAGAGGCGGAACAGUAGGUU	experimental		gga-miR-1757	mature miRNA	standard	MIMAT0007664	gga-miR-1757
558	gga-miR-1758	UCACCAAGCACUUGUCGGGCUAU	experimental		gga-miR-1758	mature miRNA	standard	MIMAT0007665	gga-miR-1758
559	gga-miR-1759-3p	GCCUCCUCUCCCAUCCUCUCCUUCU	experimental		gga-miR-1759-3p	mature miRNA	standard	MIMAT0026783	gga-miR-1759-3p
560	gga-miR-1759-5p	UAGGGUAGGAGGAGAGAGGUGU	experimental		gga-miR-1759-5p	mature miRNA	standard	MIMAT0007666	gga-miR-1759-5p
561	gga-miR-1760	UACCUCCUGUCUGACUGAUUUAU	experimental		gga-miR-1760	mature miRNA	standard	MIMAT0007667	gga-miR-1760
562	gga-miR-1761	CAGGGGUCACUUUUUUGUUU	experimental		gga-miR-1761	mature miRNA	standard	MIMAT0007668	gga-miR-1761
563	gga-miR-1762	GGCAGGAGGGAAGCAGAGCUUAGA	experimental		gga-miR-1762	mature miRNA	standard	MIMAT0007669	gga-miR-1762
564	gga-miR-1763	GAGGGCGGGAGCGGAGCGCGGGA	experimental		gga-miR-1763	mature miRNA	standard	MIMAT0007670	gga-miR-1763
565	gga-miR-1764-3p	AGCUGCUUGUUGGCUGGGGAG	experimental		gga-miR-1764-3p	mature miRNA	standard	MIMAT0007672	gga-miR-1764-3p
566	gga-miR-1764-5p	GCUCAGGCAGCAGGAGGCUUG	experimental		gga-miR-1764-5p	mature miRNA	standard	MIMAT0007671	gga-miR-1764-5p
567	gga-miR-1765	CGGAGCGCGGCCCUGCGCUG	experimental		gga-miR-1765	mature miRNA	standard	MIMAT0007673	gga-miR-1765
568	gga-miR-1766	GGCAGAUGAUUGAAAACUGAG	experimental		gga-miR-1766	mature miRNA	standard	MIMAT0007674	gga-miR-1766
569	gga-miR-1767	AGGCGAGGAGAACAGCAGCU	experimental		gga-miR-1767	mature miRNA	standard	MIMAT0007675	gga-miR-1767
570	gga-miR-1768	GAGCAGAGGAUUGUCGUGCUGA	experimental		gga-miR-1768	mature miRNA	standard	MIMAT0007676	gga-miR-1768
571	gga-miR-1769-3p	AGUGUGAAAUCUGCCUGAAAGUC	experimental		gga-miR-1769-3p	mature miRNA	standard	MIMAT0007678	gga-miR-1769-3p
572	gga-miR-1769-5p	CUUCAGGCUUUUCUCACACCUG	experimental		gga-miR-1769-5p	mature miRNA	standard	MIMAT0007677	gga-miR-1769-5p
573	gga-miR-1770	CUGCGGGGGAGGAGGGAGGGGG	experimental		gga-miR-1770	mature miRNA	standard	MIMAT0007679	gga-miR-1770
574	gga-miR-1771	CUCCAAGGCUGUUUCCUCUGA	experimental		gga-miR-1771	mature miRNA	standard	MIMAT0007680	gga-miR-1771
575	gga-miR-1772-3p	UCGUUGUCUGUUCGGUGGCAG	experimental		gga-miR-1772-3p	mature miRNA	standard	MIMAT0007682	gga-miR-1772-3p
576	gga-miR-1772-5p	CGCUGCCAGCGGAGAACGAGUU	experimental		gga-miR-1772-5p	mature miRNA	standard	MIMAT0007681	gga-miR-1772-5p
577	gga-miR-1773-3p	GGAGAGGCAUUGUCCCCUGGA	experimental		gga-miR-1773-3p	mature miRNA	standard	MIMAT0007684	gga-miR-1773-3p
578	gga-miR-1773-5p	UGGGGGAGGAGGGACCUCUGCUU	experimental		gga-miR-1773-5p	mature miRNA	standard	MIMAT0007683	gga-miR-1773-5p
579	gga-miR-1774	CCCCUGCUGAGGUUCUGCUUC	experimental		gga-miR-1774	mature miRNA	standard	MIMAT0007685	gga-miR-1774
580	gga-miR-1775-3p	UCCUGUAGCCAGAAGAUUCUGA	experimental		gga-miR-1775-3p	mature miRNA	standard	MIMAT0007686	gga-miR-1775-3p
581	gga-miR-1775-5p	UGAAUGCUUCGUGCAACAGGAAG	experimental		gga-miR-1775-5p	mature miRNA	standard	MIMAT0026784	gga-miR-1775-5p
582	gga-miR-1776	UGUAGUGAUAAGGAGACUGUCU	experimental		gga-miR-1776	mature miRNA	standard	MIMAT0007687	gga-miR-1776
583	gga-miR-1777	GUGGGCGGUGCGGGGCGGCG	experimental		gga-miR-1777	mature miRNA	standard	MIMAT0007688	gga-miR-1777
584	gga-miR-1778	GAGGGAAGAGAAAUGGUCUGCU	experimental		gga-miR-1778	mature miRNA	standard	MIMAT0007689	gga-miR-1778
585	gga-miR-1779	AGACGUGGACUGGAACACCUGAG	experimental		gga-miR-1779	mature miRNA	standard	MIMAT0007690	gga-miR-1779
586	gga-miR-1780	UCUGCGACUGCAUCUCCACUC	experimental		gga-miR-1780	mature miRNA	standard	MIMAT0007691	gga-miR-1780
587	gga-miR-1781-3p	UUUAAAUCAUGCAGCUGUUGA	experimental		gga-miR-1781-3p	mature miRNA	standard	MIMAT0007693	gga-miR-1781-3p
588	gga-miR-1781-5p	AACAGCUGAGUGAUUUAAAGCA	experimental		gga-miR-1781-5p	mature miRNA	standard	MIMAT0007692	gga-miR-1781-5p
589	gga-miR-1782	ACAUUCAUUGGAGCAGGGACA	experimental		gga-miR-1782	mature miRNA	standard	MIMAT0007694	gga-miR-1782
590	gga-miR-1783	UGCUCUGAACGAGCUGAGAGGCA	experimental		gga-miR-1783	mature miRNA	standard	MIMAT0007695	gga-miR-1783
591	gga-miR-1784-5p	UUCUGCUCUUAUUGAAAUCAGU	experimental		gga-miR-1784-5p	mature miRNA	standard	MIMAT0007696	gga-miR-1784-5p
592	gga-miR-1785	UGAGGGCAGCACUGUGUCCGGG	experimental		gga-miR-1785	mature miRNA	standard	MIMAT0007697	gga-miR-1785
593	gga-miR-1786	AUUCUUUUCUGCUGUGUUACU	experimental		gga-miR-1786	mature miRNA	standard	MIMAT0007698	gga-miR-1786
594	gga-miR-1787	UGUUGUUUACGGAAGGGGGA	experimental		gga-miR-1787	mature miRNA	standard	MIMAT0007699	gga-miR-1787
595	gga-miR-1788-3p	CAGGCAGCGAAAGCAAGUCUG	experimental		gga-miR-1788-3p	mature miRNA	standard	MIMAT0007701	gga-miR-1788-3p
596	gga-miR-1788-5p	GGCUUGUUUUCCGUUGCCUGCG	experimental		gga-miR-1788-5p	mature miRNA	standard	MIMAT0007700	gga-miR-1788-5p
597	gga-miR-1789	UGGGUGUACUUGCGGAUGAAUG	experimental		gga-miR-1789	mature miRNA	standard	MIMAT0007702	gga-miR-1789
598	gga-miR-1790	CGGGUGAGGGCGGUGGGGGA	experimental		gga-miR-1790	mature miRNA	standard	MIMAT0007703	gga-miR-1790
599	gga-miR-1791-3p	GCGAUGUGACUGAUGCAGGCUG	experimental		gga-miR-1791-3p	mature miRNA	standard	MIMAT0007705	gga-miR-1791-3p
600	gga-miR-1791-5p	UGGGCUGCAUCAGUCAUGCCAUG	experimental		gga-miR-1791-5p	mature miRNA	standard	MIMAT0007704	gga-miR-1791-5p
601	gga-miR-1792	GCGAUAGCUCAGGAACACUGCAG	experimental		gga-miR-1792	mature miRNA	standard	MIMAT0007706	gga-miR-1792
602	gga-miR-1793	UGUAAGGAGCAGAAGUGUGAAGC	experimental		gga-miR-1793	mature miRNA	standard	MIMAT0007707	gga-miR-1793
603	gga-miR-1794	GCCAGAAUGGACAUGGGCAGCAA	experimental		gga-miR-1794	mature miRNA	standard	MIMAT0007708	gga-miR-1794
604	gga-miR-1795	GCAAGAUGAAGAACAGGCCUGU	experimental		gga-miR-1795	mature miRNA	standard	MIMAT0007709	gga-miR-1795
605	gga-miR-1796	GAACUGCUGAAGGAGGGCUGA	experimental		gga-miR-1796	mature miRNA	standard	MIMAT0007710	gga-miR-1796
606	gga-miR-1797	GCUUGGAACUGAGCAGGAACUG	experimental		gga-miR-1797	mature miRNA	standard	MIMAT0007711	gga-miR-1797
607	gga-miR-1798-3p	UGGUUUUCAGAAGUGUAGCGUU	experimental		gga-miR-1798-3p	mature miRNA	standard	MIMAT0007714	gga-miR-1798-3p
608	gga-miR-1798-5p	AACGUGACACUUUAGAAAAC	experimental		gga-miR-1798-5p	mature miRNA	standard	MIMAT0007713	gga-miR-1798-5p
609	gga-miR-1799	UGAAGUGAUGAUGCCUGAUUA	experimental		gga-miR-1799	mature miRNA	standard	MIMAT0007715	gga-miR-1799
610	gga-miR-1800	ACUACGUGAUGCGAUCUGAUG	experimental		gga-miR-1800	mature miRNA	standard	MIMAT0007716	gga-miR-1800
611	gga-miR-1801	CCCGGCAUGCUGCACUGUCCUG	experimental		gga-miR-1801	mature miRNA	standard	MIMAT0007717	gga-miR-1801
612	gga-miR-1802	CAGUGACUGCUUUUGUGCUUAU	experimental		gga-miR-1802	mature miRNA	standard	MIMAT0007718	gga-miR-1802
613	gga-miR-1803	AUUGACUUCAGCGGGGUUUGG	experimental		gga-miR-1803	mature miRNA	standard	MIMAT0007720	gga-miR-1803
614	gga-miR-1804	UCAGAAGUUGUGAAAGCUGCAG	experimental		gga-miR-1804	mature miRNA	standard	MIMAT0007721	gga-miR-1804
615	gga-miR-1805-3p	UGUAUUGGAACACUACAGCUC	experimental		gga-miR-1805-3p	mature miRNA	standard	MIMAT0007723	gga-miR-1805-3p
616	gga-miR-1805-5p	GAGUUGUAGUCUUUCAAACAGA	experimental		gga-miR-1805-5p	mature miRNA	standard	MIMAT0007722	gga-miR-1805-5p
617	gga-miR-1806	AGGCAGGAUCACAAGGUCUGGA	experimental		gga-miR-1806	mature miRNA	standard	MIMAT0007724	gga-miR-1806
618	gga-miR-1807	GCAGAAUGAGGCUAGAGCUGAG	experimental		gga-miR-1807	mature miRNA	standard	MIMAT0007725	gga-miR-1807
619	gga-miR-1808	UUUGUUGGGAAUGAAUACAUAUU	experimental		gga-miR-1808	mature miRNA	standard	MIMAT0007726	gga-miR-1808
620	gga-miR-1809	ACGUGGGAAGUUUGGCAGAGCAUG	experimental		gga-miR-1809	mature miRNA	standard	MIMAT0007727	gga-miR-1809
621	gga-miR-1811	UAUUGCAGCGCUGGGUGCAU	experimental		gga-miR-1811	mature miRNA	standard	MIMAT0007729	gga-miR-1811
622	gga-miR-1812-3p	CAUACUAUACAGUAUAUAUCUA	experimental		gga-miR-1812-3p	mature miRNA	standard	MIMAT0026785	gga-miR-1812-3p
623	gga-miR-1812-5p	AUAUAUACUGUAUACUGUGUCA	experimental		gga-miR-1812-5p	mature miRNA	standard	MIMAT0007730	gga-miR-1812-5p
624	gga-miR-1813	UUCUGUGGCUGCAAGGAGAG	experimental		gga-miR-1813	mature miRNA	standard	MIMAT0007600	gga-miR-1813
625	gga-miR-1814	AGGUUGUUUGGUUUUGUUUU	experimental		gga-miR-1814	mature miRNA	standard	MIMAT0007513	gga-miR-1814
626	gga-miR-1815	UAGGUUUUAUGGUUUUGUUUU	experimental		gga-miR-1815	mature miRNA	standard	MIMAT0007512	gga-miR-1815
627	gga-miR-1816	GUAGGUUUUGUGGUUUUGUU	experimental		gga-miR-1816	mature miRNA	standard	MIMAT0007656	gga-miR-1816
628	gga-miR-1845	CCGGCUGCGCCCGGAGGA	experimental		gga-miR-1845	mature miRNA	standard	MIMAT0007749	gga-miR-1845
629	gga-miR-2126	AGCGGCGCGGUAGGAGCA	experimental		gga-miR-2126	mature miRNA	standard	MIMAT0011202	gga-miR-2126
630	gga-miR-2127	CGGGAGGGGAGGGAGGGCGGG	experimental		gga-miR-2127	mature miRNA	standard	MIMAT0011203	gga-miR-2127
631	gga-miR-2128	UGCAGUGACGUCUCUUCCCC	experimental		gga-miR-2128	mature miRNA	standard	MIMAT0011204	gga-miR-2128
632	gga-miR-2129	CAGCAGGACUGGCUUUGUUACGA	experimental		gga-miR-2129	mature miRNA	standard	MIMAT0011205	gga-miR-2129
633	gga-miR-2130	UCCCAGUGGAGCUCUGCAAGGAC	experimental		gga-miR-2130	mature miRNA	standard	MIMAT0011206	gga-miR-2130
634	gga-miR-2131-3p	CUGUUACUGUUCUUCUGAUGG	experimental		gga-miR-2131-3p	mature miRNA	standard	MIMAT0026920	gga-miR-2131-3p
635	gga-miR-2131-5p	AUGCAGAAGUGCACGGAAACAGCU	experimental		gga-miR-2131-5p	mature miRNA	standard	MIMAT0011207	gga-miR-2131-5p
636	gga-miR-2188-3p	GAUAUAUGUGGUCAGACCUAUC	experimental		gga-miR-2188-3p	mature miRNA	standard	MIMAT0027028	gga-miR-2188-3p
637	gga-miR-2188-5p	AAGGUCCAACCUCACAUGUCCU	experimental		gga-miR-2188-5p	mature miRNA	standard	MIMAT0016372	gga-miR-2188-5p
638	gga-miR-2954	CAUCCCCAUUCCACUCCUAGCA	experimental		gga-miR-2954	mature miRNA	standard	MIMAT0014448	gga-miR-2954
639	gga-miR-3064-3p	UUGCCACACUGCAACACUUUACA	experimental		gga-miR-3064-3p	mature miRNA	standard	MIMAT0025632	gga-miR-3064-3p
640	gga-miR-3064-5p	UGGCUGUUGUGGUGUGCAAAA	experimental		gga-miR-3064-5p	mature miRNA	standard	MIMAT0025631	gga-miR-3064-5p
641	gga-miR-3523	CCGCGCAGUGCCUCGUCCUCGA	experimental		gga-miR-3523	mature miRNA	standard	MIMAT0016373	gga-miR-3523
642	gga-miR-3524a	CAGAAUCGCAGAAUGGCUGAGG	experimental		gga-miR-3524a	mature miRNA	standard	MIMAT0016374	gga-miR-3524a
643	gga-miR-3524b-3p	CACAGAAUUGUGGGAUGGCUG	experimental		gga-miR-3524b-3p	mature miRNA	standard	MIMAT0025753	gga-miR-3524b-3p
644	gga-miR-3525	CAGCCAUUCUGCGAUUCUGUGA	experimental		gga-miR-3525	mature miRNA	standard	MIMAT0016382	gga-miR-3525
645	gga-miR-3526	UUGAAGAUGAAGUUGGUGU	experimental		gga-miR-3526	mature miRNA	standard	MIMAT0016375	gga-miR-3526
646	gga-miR-3528	CAUGCCCCAGUCGUGUUGCAGA	experimental		gga-miR-3528	mature miRNA	standard	MIMAT0016377	gga-miR-3528
647	gga-miR-3529	AGGCAGACUGUGACUUGUUGU	experimental		gga-miR-3529	mature miRNA	standard	MIMAT0016378	gga-miR-3529
648	gga-miR-3530-3p	CAAUGGUGUGAGCUGGGAUGG	experimental		gga-miR-3530-3p	mature miRNA	standard	MIMAT0016379	gga-miR-3530-3p
649	gga-miR-3530-5p	GCUCUGCUCGCACCAUUGUGG	experimental		gga-miR-3530-5p	mature miRNA	standard	MIMAT0027029	gga-miR-3530-5p
650	gga-miR-3531-3p	CCUUGCAACACAAACAGGAGACA	experimental		gga-miR-3531-3p	mature miRNA	standard	MIMAT0027030	gga-miR-3531-3p
651	gga-miR-3531-5p	UCCUUGUUUGGGUUGUAAUGA	experimental		gga-miR-3531-5p	mature miRNA	standard	MIMAT0016381	gga-miR-3531-5p
652	gga-miR-3532-3p	UUGGAGGCUGCAGUGUCAUGGU	experimental		gga-miR-3532-3p	mature miRNA	standard	MIMAT0016383	gga-miR-3532-3p
653	gga-miR-3532-5p	GUUGCACUGCAGCUGCUCUUGG	experimental		gga-miR-3532-5p	mature miRNA	standard	MIMAT0027031	gga-miR-3532-5p
654	gga-miR-3533	AUGAAGUGUGAUGUGGAUAU	experimental		gga-miR-3533	mature miRNA	standard	MIMAT0016384	gga-miR-3533
655	gga-miR-3534	UGUGGGUUGACAGUGCUGAGGU	experimental		gga-miR-3534	mature miRNA	standard	MIMAT0016385	gga-miR-3534
656	gga-miR-3535	GGAUAUGAUGACUGAUUAUCUGAAA	experimental		gga-miR-3535	mature miRNA	standard	MIMAT0016386	gga-miR-3535
657	gga-miR-3536	CUGCAUACGAGUAGACCCUUUC	experimental		gga-miR-3536	mature miRNA	standard	MIMAT0016387	gga-miR-3536
658	gga-miR-3537	GUGAGUGCUGUAGGAUGGGGCUC	experimental		gga-miR-3537	mature miRNA	standard	MIMAT0016388	gga-miR-3537
659	gga-miR-3538	GUUCGGUGAUGAAACCAUGGA	experimental		gga-miR-3538	mature miRNA	standard	MIMAT0016389	gga-miR-3538
660	gga-miR-3539	CAGAGGAAGACUGAUGCUAGUU	experimental		gga-miR-3539	mature miRNA	standard	MIMAT0016390	gga-miR-3539
661	gga-miR-3540	AUGGUGGAAGAACAAGGCCUGC	experimental		gga-miR-3540	mature miRNA	standard	MIMAT0016391	gga-miR-3540
662	gga-miR-3594-3p	UCUGCAUCGCUGGGCUGUGUCC	experimental		gga-miR-3594-3p	mature miRNA	standard	MIMAT0025642	gga-miR-3594-3p
663	gga-miR-3594-5p	GCACAGCCCAUGUCAGAGCAGUG	experimental		gga-miR-3594-5p	mature miRNA	standard	MIMAT0025641	gga-miR-3594-5p
664	gga-miR-3607-3p	CUGUAAACGCUUUCUGAUGUGCC	experimental		gga-miR-3607-3p	mature miRNA	standard	MIMAT0025608	gga-miR-3607-3p
665	gga-miR-3607-5p	UACAUAUGAUGAGCUUUGCAGU	experimental		gga-miR-3607-5p	mature miRNA	standard	MIMAT0025607	gga-miR-3607-5p
666	gga-miR-4732-5p	UGGAGGAGGGAGCAGGAAUAU	experimental		gga-miR-4732-5p	mature miRNA	standard	MIMAT0025717	gga-miR-4732-5p
667	gga-miR-6516-3p	CAUGUAUGAUACUGCACACAACG	experimental		gga-miR-6516-3p	mature miRNA	standard	MIMAT0025807	gga-miR-6516-3p
668	gga-miR-6516-5p	AUGCAGUAACAGGUGUGAGCAU	experimental		gga-miR-6516-5p	mature miRNA	standard	MIMAT0025806	gga-miR-6516-5p
669	gga-miR-6542-3p	ACGGGACAGUGCUGAAGACUA	experimental		gga-miR-6542-3p	mature miRNA	standard	MIMAT0025590	gga-miR-6542-3p
670	gga-miR-6542-5p	GUCUGCCAGCAUCAGCCCCAGU	experimental		gga-miR-6542-5p	mature miRNA	standard	MIMAT0025589	gga-miR-6542-5p
671	gga-miR-6543-3p	GCCUCCUUUCAGGUCACU	experimental		gga-miR-6543-3p	mature miRNA	standard	MIMAT0025827	gga-miR-6543-3p
672	gga-miR-6543-5p	GCUGUUACCUGAGAGAAGAUGCUG	experimental		gga-miR-6543-5p	mature miRNA	standard	MIMAT0025826	gga-miR-6543-5p
673	gga-miR-6544-3p	AAGUUGUAUUUCUUUUCUGACAGU	experimental		gga-miR-6544-3p	mature miRNA	standard	MIMAT0025592	gga-miR-6544-3p
674	gga-miR-6544-5p	UUCAGAAAAGGAUAUGAAUUGU	experimental		gga-miR-6544-5p	mature miRNA	standard	MIMAT0025591	gga-miR-6544-5p
675	gga-miR-6545-3p	AGCUGGAGCUGAUUUUCUGGCA	experimental		gga-miR-6545-3p	mature miRNA	standard	MIMAT0025594	gga-miR-6545-3p
676	gga-miR-6545-5p	GGCAGAAAAGGGCUGCAGCUU	experimental		gga-miR-6545-5p	mature miRNA	standard	MIMAT0025593	gga-miR-6545-5p
677	gga-miR-6546-3p	GGAGUUCAGCUGUGCUGCUGC	experimental		gga-miR-6546-3p	mature miRNA	standard	MIMAT0025596	gga-miR-6546-3p
678	gga-miR-6546-5p	AGGAGCGCCUCUGAGCUCCCCU	experimental		gga-miR-6546-5p	mature miRNA	standard	MIMAT0025595	gga-miR-6546-5p
679	gga-miR-6547-3p	ACCCCUCCAUCCACCCACUCA	experimental		gga-miR-6547-3p	mature miRNA	standard	MIMAT0025598	gga-miR-6547-3p
680	gga-miR-6547-5p	GUGGGAUGUGGGGACGGGGUGA	experimental		gga-miR-6547-5p	mature miRNA	standard	MIMAT0025597	gga-miR-6547-5p
681	gga-miR-6548-3p	AGAGGUGCCCCGCUGUUGCUGU	experimental		gga-miR-6548-3p	mature miRNA	standard	MIMAT0025602	gga-miR-6548-3p
682	gga-miR-6548-5p	AACAACAGCUGCGUGCCAUGCC	experimental		gga-miR-6548-5p	mature miRNA	standard	MIMAT0025601	gga-miR-6548-5p
683	gga-miR-6549-3p	ACAGCUGUAAGCAGAAGGCACCC	experimental		gga-miR-6549-3p	mature miRNA	standard	MIMAT0025604	gga-miR-6549-3p
684	gga-miR-6549-5p	AGCCUUCUGUUGUGCAUCUGAGA	experimental		gga-miR-6549-5p	mature miRNA	standard	MIMAT0025603	gga-miR-6549-5p
685	gga-miR-6550-3p	GCUCCACCCUCGGCUGCUUUGA	experimental		gga-miR-6550-3p	mature miRNA	standard	MIMAT0025606	gga-miR-6550-3p
686	gga-miR-6550-5p	AAAGCAGCCCAGGAAGCGCU	experimental		gga-miR-6550-5p	mature miRNA	standard	MIMAT0025605	gga-miR-6550-5p
687	gga-miR-6551-3p	GGGCUGUGAGAGAUGUUCCCUU	experimental		gga-miR-6551-3p	mature miRNA	standard	MIMAT0025610	gga-miR-6551-3p
688	gga-miR-6551-5p	CGGUGCAUCUCUGCAGCCCGCA	experimental		gga-miR-6551-5p	mature miRNA	standard	MIMAT0025609	gga-miR-6551-5p
689	gga-miR-6552-3p	CAACAAGAAGUGGACAGACUG	experimental		gga-miR-6552-3p	mature miRNA	standard	MIMAT0025612	gga-miR-6552-3p
690	gga-miR-6552-5p	GUCUGUCCAGGUCUUGUUGGA	experimental		gga-miR-6552-5p	mature miRNA	standard	MIMAT0025611	gga-miR-6552-5p
691	gga-miR-6553-3p	AACACUACCCUGAGCUGCUCC	experimental		gga-miR-6553-3p	mature miRNA	standard	MIMAT0025614	gga-miR-6553-3p
692	gga-miR-6553-5p	AGCAGCCCUGUGAUAGCUGUUUGC	experimental		gga-miR-6553-5p	mature miRNA	standard	MIMAT0025613	gga-miR-6553-5p
693	gga-miR-6554-3p	UGCUGUGUGGUUUAAGGAUACU	experimental		gga-miR-6554-3p	mature miRNA	standard	MIMAT0025616	gga-miR-6554-3p
694	gga-miR-6554-5p	UGUUUUUACAUUACACAGCAUA	experimental		gga-miR-6554-5p	mature miRNA	standard	MIMAT0025615	gga-miR-6554-5p
695	gga-miR-6555-3p	AAUGUGGCCUCAACAGAGCAG	experimental		gga-miR-6555-3p	mature miRNA	standard	MIMAT0025620	gga-miR-6555-3p
696	gga-miR-6555-5p	GAUCUGCAGAGCCCACAACUAG	experimental		gga-miR-6555-5p	mature miRNA	standard	MIMAT0025619	gga-miR-6555-5p
697	gga-miR-6556-3p	GGCGGCGGUCCGAGCAGCUCCC	experimental		gga-miR-6556-3p	mature miRNA	standard	MIMAT0025622	gga-miR-6556-3p
698	gga-miR-6556-5p	AAGGCUGCUCGGCCCGCGCUGC	experimental		gga-miR-6556-5p	mature miRNA	standard	MIMAT0025621	gga-miR-6556-5p
699	gga-miR-6557-3p	CGCGCCGAUUGUCUCCUCCGGGCAC	experimental		gga-miR-6557-3p	mature miRNA	standard	MIMAT0025829	gga-miR-6557-3p
700	gga-miR-6557-5p	CCGGAGGAGCCCGGCGCUGC	experimental		gga-miR-6557-5p	mature miRNA	standard	MIMAT0025828	gga-miR-6557-5p
701	gga-miR-6558-3p	AGGCCUUCUUGCGUAGCACUUGA	experimental		gga-miR-6558-3p	mature miRNA	standard	MIMAT0025624	gga-miR-6558-3p
702	gga-miR-6558-5p	AAGUGAAACGUUGAGGUGGCUUGU	experimental		gga-miR-6558-5p	mature miRNA	standard	MIMAT0025623	gga-miR-6558-5p
703	gga-miR-6559-3p	AGAGUUGACUCUUCCUUGCAGU	experimental		gga-miR-6559-3p	mature miRNA	standard	MIMAT0025626	gga-miR-6559-3p
704	gga-miR-6559-5p	UGGGAGAAAGAGUCAUUACCUGA	experimental		gga-miR-6559-5p	mature miRNA	standard	MIMAT0025625	gga-miR-6559-5p
705	gga-miR-6560-3p	UACCAGGAUGGACCGCUGCACACC	experimental		gga-miR-6560-3p	mature miRNA	standard	MIMAT0025628	gga-miR-6560-3p
706	gga-miR-6560-5p	UGUGUUGCUCCAUACUGUGGUCU	experimental		gga-miR-6560-5p	mature miRNA	standard	MIMAT0025627	gga-miR-6560-5p
707	gga-miR-6561-3p	GGGAGCCCAGAACUGGAAACAG	experimental		gga-miR-6561-3p	mature miRNA	standard	MIMAT0025630	gga-miR-6561-3p
708	gga-miR-6561-5p	UCUUUCCAGGCAGGAGCUCCCU	experimental		gga-miR-6561-5p	mature miRNA	standard	MIMAT0025629	gga-miR-6561-5p
709	gga-miR-6562-3p	UCAGUCAUUUCUUGCUCUCUGU	experimental		gga-miR-6562-3p	mature miRNA	standard	MIMAT0025833	gga-miR-6562-3p
710	gga-miR-6562-5p	AGGGGAAAGGAAUGUGCUGUGG	experimental		gga-miR-6562-5p	mature miRNA	standard	MIMAT0025832	gga-miR-6562-5p
711	gga-miR-6563-3p	ACUGGGCACACUGUGACUGGCUAC	experimental		gga-miR-6563-3p	mature miRNA	standard	MIMAT0025835	gga-miR-6563-3p
712	gga-miR-6563-5p	GUUGGUCGGUUGUGCUUAGAGA	experimental		gga-miR-6563-5p	mature miRNA	standard	MIMAT0025834	gga-miR-6563-5p
713	gga-miR-6564-3p	UGGACGGAGGAAGCGCGGGCAG	experimental		gga-miR-6564-3p	mature miRNA	standard	MIMAT0025634	gga-miR-6564-3p
714	gga-miR-6564-5p	CGCCGUGCUUUCUCCCGCCGU	experimental		gga-miR-6564-5p	mature miRNA	standard	MIMAT0025633	gga-miR-6564-5p
715	gga-miR-6565-3p	UCUGUGCUUGUGUACUCAUAG	experimental		gga-miR-6565-3p	mature miRNA	standard	MIMAT0025636	gga-miR-6565-3p
716	gga-miR-6565-5p	AUGAGAUAGCAAAGCACACUUC	experimental		gga-miR-6565-5p	mature miRNA	standard	MIMAT0025635	gga-miR-6565-5p
717	gga-miR-6566-3p	CAGCAGGCCAUGGGGUCGCAG	experimental		gga-miR-6566-3p	mature miRNA	standard	MIMAT0025638	gga-miR-6566-3p
718	gga-miR-6566-5p	GAGGCCCGAUGUGUCAUUCCU	experimental		gga-miR-6566-5p	mature miRNA	standard	MIMAT0025637	gga-miR-6566-5p
719	gga-miR-6567-3p	GGCAGCGCGGAGCGGAGCUUU	experimental		gga-miR-6567-3p	mature miRNA	standard	MIMAT0025640	gga-miR-6567-3p
720	gga-miR-6567-5p	AGCUCCGAACUCGCGGUGCCCG	experimental		gga-miR-6567-5p	mature miRNA	standard	MIMAT0025639	gga-miR-6567-5p
721	gga-miR-6568-3p	ACAACCAAGAUGGCGCCCGGGC	experimental		gga-miR-6568-3p	mature miRNA	standard	MIMAT0025644	gga-miR-6568-3p
722	gga-miR-6568-5p	GCGGCCGCCAUCUUGCUUGCG	experimental		gga-miR-6568-5p	mature miRNA	standard	MIMAT0025643	gga-miR-6568-5p
723	gga-miR-6569-3p	CUUGAGUUACGGACUGGGGUUGG	experimental		gga-miR-6569-3p	mature miRNA	standard	MIMAT0025646	gga-miR-6569-3p
724	gga-miR-6569-5p	GCCCUGUUGGACUAACGGCGUUG	experimental		gga-miR-6569-5p	mature miRNA	standard	MIMAT0025645	gga-miR-6569-5p
725	gga-miR-6570-3p	AGAGGAGAGCCUGUGGGCCAGA	experimental		gga-miR-6570-3p	mature miRNA	standard	MIMAT0025648	gga-miR-6570-3p
726	gga-miR-6570-5p	AGGACCCACUGGAUCUGCAUCUUC	experimental		gga-miR-6570-5p	mature miRNA	standard	MIMAT0025647	gga-miR-6570-5p
727	gga-miR-6571-3p	UGAGAGACCACAUACAGCUUUGAAA	experimental		gga-miR-6571-3p	mature miRNA	standard	MIMAT0025650	gga-miR-6571-3p
728	gga-miR-6571-5p	GUAAAGCUGUUUGGAUCUUCAG	experimental		gga-miR-6571-5p	mature miRNA	standard	MIMAT0025649	gga-miR-6571-5p
729	gga-miR-6572-3p	AGAUGGACAGAUAGGGUGAGGA	experimental		gga-miR-6572-3p	mature miRNA	standard	MIMAT0025652	gga-miR-6572-3p
730	gga-miR-6572-5p	UUUUCCCUCUCUGUGCAGUUCUG	experimental		gga-miR-6572-5p	mature miRNA	standard	MIMAT0025651	gga-miR-6572-5p
731	gga-miR-6573-3p	GGAGGCACUCUGACUUCUCGGA	experimental		gga-miR-6573-3p	mature miRNA	standard	MIMAT0025654	gga-miR-6573-3p
732	gga-miR-6573-5p	UGGAGAAGUGAGGGGCUCUCUG	experimental		gga-miR-6573-5p	mature miRNA	standard	MIMAT0025653	gga-miR-6573-5p
733	gga-miR-6574-3p	UGUCUGUAGAAAAGACAGGAUGU	experimental		gga-miR-6574-3p	mature miRNA	standard	MIMAT0025656	gga-miR-6574-3p
734	gga-miR-6574-5p	AUUCCUUGUCUUUUCUGAAGA	experimental		gga-miR-6574-5p	mature miRNA	standard	MIMAT0025655	gga-miR-6574-5p
735	gga-miR-6575-3p	GAGUUUUCCCAGGCUGAUGUCA	experimental		gga-miR-6575-3p	mature miRNA	standard	MIMAT0025658	gga-miR-6575-3p
736	gga-miR-6575-5p	UUGUCAGCUUGGGGAAGCUCUU	experimental		gga-miR-6575-5p	mature miRNA	standard	MIMAT0025657	gga-miR-6575-5p
737	gga-miR-6576-3p	AGUGUCUGUAUUCCCUUGAG	experimental		gga-miR-6576-3p	mature miRNA	standard	MIMAT0025660	gga-miR-6576-3p
738	gga-miR-6576-5p	UCAUGGUUGUAUCUGAACACUUU	experimental		gga-miR-6576-5p	mature miRNA	standard	MIMAT0025659	gga-miR-6576-5p
739	gga-miR-6577-3p	AGAGACUGGGUAUAGGAGGGU	experimental		gga-miR-6577-3p	mature miRNA	standard	MIMAT0025662	gga-miR-6577-3p
740	gga-miR-6577-5p	CAUCUUCUACUCUGUUUUCUUCU	experimental		gga-miR-6577-5p	mature miRNA	standard	MIMAT0025661	gga-miR-6577-5p
741	gga-miR-6578-3p	GGGCACUCUGCUGACCGCUUGGC	experimental		gga-miR-6578-3p	mature miRNA	standard	MIMAT0025664	gga-miR-6578-3p
742	gga-miR-6578-5p	CAGCUGUGGCAGAGUUCUCCA	experimental		gga-miR-6578-5p	mature miRNA	standard	MIMAT0025663	gga-miR-6578-5p
743	gga-miR-6579-3p	AGAGGCAUUUCACAGCGUAACA	experimental		gga-miR-6579-3p	mature miRNA	standard	MIMAT0025666	gga-miR-6579-3p
744	gga-miR-6579-5p	CAACGCCGUGCAACGCACCUG	experimental		gga-miR-6579-5p	mature miRNA	standard	MIMAT0025665	gga-miR-6579-5p
745	gga-miR-6580-3p	GUGCAUAUUGGAGGCAAUGAUCU	experimental		gga-miR-6580-3p	mature miRNA	standard	MIMAT0025668	gga-miR-6580-3p
746	gga-miR-6580-5p	AGAAUUGACUUCAGUGCUGACU	experimental		gga-miR-6580-5p	mature miRNA	standard	MIMAT0025667	gga-miR-6580-5p
747	gga-miR-6581-3p	UGUCUCCCUGGUGGGCUUUUU	experimental		gga-miR-6581-3p	mature miRNA	standard	MIMAT0025670	gga-miR-6581-3p
748	gga-miR-6581-5p	AGUGAGCUCAGAGGAGGACUGGG	experimental		gga-miR-6581-5p	mature miRNA	standard	MIMAT0025669	gga-miR-6581-5p
749	gga-miR-6582-3p	CACUCUGGGUGUUUCUCUUGCAG	experimental		gga-miR-6582-3p	mature miRNA	standard	MIMAT0025672	gga-miR-6582-3p
750	gga-miR-6582-5p	UUAGAGAGACACUCAUAGAG	experimental		gga-miR-6582-5p	mature miRNA	standard	MIMAT0025671	gga-miR-6582-5p
751	gga-miR-6583-5p	AGAGGAGCUGGGAGGAUG	experimental		gga-miR-6583-5p	mature miRNA	standard	MIMAT0025673	gga-miR-6583-5p
752	gga-miR-6584-5p	UCUGGAAGUUCUGCAGAUGAUGA	experimental		gga-miR-6584-5p	mature miRNA	standard	MIMAT0025675	gga-miR-6584-5p
753	gga-miR-6585-5p	AAUCAGAACGUGCUGUGAGCU	experimental		gga-miR-6585-5p	mature miRNA	standard	MIMAT0025676	gga-miR-6585-5p
754	gga-miR-6586-5p	UGCUGCCAGAUAGAAGUUCACCU	experimental		gga-miR-6586-5p	mature miRNA	standard	MIMAT0025677	gga-miR-6586-5p
755	gga-miR-6587-3p	UGCUGGAAGUGGUGCUGGAGGCU	experimental		gga-miR-6587-3p	mature miRNA	standard	MIMAT0025679	gga-miR-6587-3p
756	gga-miR-6587-5p	UCUCCAGCGCAAACCUCACGCAG	experimental		gga-miR-6587-5p	mature miRNA	standard	MIMAT0025678	gga-miR-6587-5p
757	gga-miR-6588-3p	UUGCUGGGCUGGGGGAAGAGGAU	experimental		gga-miR-6588-3p	mature miRNA	standard	MIMAT0025680	gga-miR-6588-3p
758	gga-miR-6589-5p	UGAUGGAGAUGGUGUGAAGCAGA	experimental		gga-miR-6589-5p	mature miRNA	standard	MIMAT0025681	gga-miR-6589-5p
759	gga-miR-6590-3p	UUACUUCUGUUCCUGAUCAUCA	experimental		gga-miR-6590-3p	mature miRNA	standard	MIMAT0025683	gga-miR-6590-3p
760	gga-miR-6590-5p	UGGGAUCAGGUGCUGAAAUAAGA	experimental		gga-miR-6590-5p	mature miRNA	standard	MIMAT0025682	gga-miR-6590-5p
761	gga-miR-6591-3p	GCAGCCCGACGGACCGGCU	experimental		gga-miR-6591-3p	mature miRNA	standard	MIMAT0025684	gga-miR-6591-3p
762	gga-miR-6592-3p	AGCGUCUCCCGCCUGACGGCC	experimental		gga-miR-6592-3p	mature miRNA	standard	MIMAT0025685	gga-miR-6592-3p
763	gga-miR-6593-3p	CGAGCUCUGUCCCUGCAG	experimental		gga-miR-6593-3p	mature miRNA	standard	MIMAT0025687	gga-miR-6593-3p
764	gga-miR-6593-5p	UGCUGGGAGGGCUCUGUGCGGCU	experimental		gga-miR-6593-5p	mature miRNA	standard	MIMAT0025686	gga-miR-6593-5p
765	gga-miR-6594-5p	UGGGGGUGGCGUGAGUUGUGG	experimental		gga-miR-6594-5p	mature miRNA	standard	MIMAT0025688	gga-miR-6594-5p
766	gga-miR-6595-5p	UGAGAUGAUGAAUCCUUUCUGAUCA	experimental		gga-miR-6595-5p	mature miRNA	standard	MIMAT0025689	gga-miR-6595-5p
767	gga-miR-6596-3p	CGGAGCUCGGACGGCGUCCCGA	experimental		gga-miR-6596-3p	mature miRNA	standard	MIMAT0025691	gga-miR-6596-3p
768	gga-miR-6596-5p	GCCGAGCCCGGGCCUUCCC	experimental		gga-miR-6596-5p	mature miRNA	standard	MIMAT0025690	gga-miR-6596-5p
769	gga-miR-6597-3p	CCUUCCCUGACGUAGAGGCCGGCC	experimental		gga-miR-6597-3p	mature miRNA	standard	MIMAT0025692	gga-miR-6597-3p
770	gga-miR-6598-5p	UGCAGCAAGGGAGAAGUCUGC	experimental		gga-miR-6598-5p	mature miRNA	standard	MIMAT0025693	gga-miR-6598-5p
771	gga-miR-6599-3p	UGACGGAUCCUGGCUCCCUCCG	experimental		gga-miR-6599-3p	mature miRNA	standard	MIMAT0025837	gga-miR-6599-3p
772	gga-miR-6599-5p	AAGGGAGGCUCCGGUCCGCUCUGA	experimental		gga-miR-6599-5p	mature miRNA	standard	MIMAT0025836	gga-miR-6599-5p
773	gga-miR-6600-3p	UGCAGUGAGACGGGCUCCCACAU	experimental		gga-miR-6600-3p	mature miRNA	standard	MIMAT0025694	gga-miR-6600-3p
774	gga-miR-6601-3p	GAUGUCUGUGGCUCUGGGCAG	experimental		gga-miR-6601-3p	mature miRNA	standard	MIMAT0025695	gga-miR-6601-3p
775	gga-miR-6602-5p	ACAGGGAUUGCAGAGGUUGGAG	experimental		gga-miR-6602-5p	mature miRNA	standard	MIMAT0025696	gga-miR-6602-5p
776	gga-miR-6603-3p	AAGGACAAGAGGAAAUGGUUUCA	experimental		gga-miR-6603-3p	mature miRNA	standard	MIMAT0025697	gga-miR-6603-3p
777	gga-miR-6604-5p	UGGCACGGUGCUAGGGAUUUCUGU	experimental		gga-miR-6604-5p	mature miRNA	standard	MIMAT0025698	gga-miR-6604-5p
778	gga-miR-6605-5p	ACUGCAGAGCUUCUUGAACAAGA	experimental		gga-miR-6605-5p	mature miRNA	standard	MIMAT0025699	gga-miR-6605-5p
779	gga-miR-6606-5p	GAGGAGCGGGAGGAGCGGGA	experimental		gga-miR-6606-5p	mature miRNA	standard	MIMAT0025700	gga-miR-6606-5p
780	gga-miR-6607-5p	GGUUGGUGUGGGAAGUGAGGAUGG	experimental		gga-miR-6607-5p	mature miRNA	standard	MIMAT0025701	gga-miR-6607-5p
781	gga-miR-6608-3p	AGCACUGCAAGAGGGAGAGAGAU	experimental		gga-miR-6608-3p	mature miRNA	standard	MIMAT0025703	gga-miR-6608-3p
782	gga-miR-6608-5p	UGAUGGGGAAUGAAGAUGAA	experimental		gga-miR-6608-5p	mature miRNA	standard	MIMAT0025702	gga-miR-6608-5p
783	gga-miR-6609-3p	ACAGCCCCUGUGCUCUGACCGCA	experimental		gga-miR-6609-3p	mature miRNA	standard	MIMAT0025704	gga-miR-6609-3p
784	gga-miR-6610-3p	UGGGUGGCUUUGGAGAUAUGGA	experimental		gga-miR-6610-3p	mature miRNA	standard	MIMAT0025705	gga-miR-6610-3p
785	gga-miR-6611-5p	UGCUGGAUCCAGUGACACUUCA	experimental		gga-miR-6611-5p	mature miRNA	standard	MIMAT0025706	gga-miR-6611-5p
786	gga-miR-6612-5p	ACCACAGGGCACCACCAUGCUG	experimental		gga-miR-6612-5p	mature miRNA	standard	MIMAT0025707	gga-miR-6612-5p
787	gga-miR-6613-3p	ACACUGAGCUGGAAGAAUCAUG	experimental		gga-miR-6613-3p	mature miRNA	standard	MIMAT0025708	gga-miR-6613-3p
788	gga-miR-6614-3p	ACAGGACAGCGAGAAGGC	experimental		gga-miR-6614-3p	mature miRNA	standard	MIMAT0025709	gga-miR-6614-3p
789	gga-miR-6615-3p	UGGCACUGAUGUGUUCUCCACA	experimental		gga-miR-6615-3p	mature miRNA	standard	MIMAT0025711	gga-miR-6615-3p
790	gga-miR-6615-5p	UUGGGGACACCAUCAGAACAGCCA	experimental		gga-miR-6615-5p	mature miRNA	standard	MIMAT0025710	gga-miR-6615-5p
791	gga-miR-6616-5p	GCUCUGUGAUGGCUAGCUGAGA	experimental		gga-miR-6616-5p	mature miRNA	standard	MIMAT0025712	gga-miR-6616-5p
792	gga-miR-6617-3p	UGUUUCAGAGCAGGUCAGUCGUU	experimental		gga-miR-6617-3p	mature miRNA	standard	MIMAT0025713	gga-miR-6617-3p
793	gga-miR-6618-5p	AGAGGCUGCUGUUCCUCUCCUG	experimental		gga-miR-6618-5p	mature miRNA	standard	MIMAT0025714	gga-miR-6618-5p
794	gga-miR-6619-5p	AGGAGAAGUGACGGAGCAGUGC	experimental		gga-miR-6619-5p	mature miRNA	standard	MIMAT0025715	gga-miR-6619-5p
795	gga-miR-6620-5p	AGAGAUGGAAGCGCUGCGCACGG	experimental		gga-miR-6620-5p	mature miRNA	standard	MIMAT0025716	gga-miR-6620-5p
796	gga-miR-6621-5p	ACAGGGAUUACAGGGCUCUGA	experimental		gga-miR-6621-5p	mature miRNA	standard	MIMAT0025718	gga-miR-6621-5p
797	gga-miR-6622-3p	UGUGGGGACAUUUCUGUGGCAUU	experimental		gga-miR-6622-3p	mature miRNA	standard	MIMAT0025825	gga-miR-6622-3p
798	gga-miR-6623-3p	ACAGCUGGAGACCAUCUUUUCA	experimental		gga-miR-6623-3p	mature miRNA	standard	MIMAT0025719	gga-miR-6623-3p
799	gga-miR-6624-3p	UCCAGGGAAGGGCUUCUGUUU	experimental		gga-miR-6624-3p	mature miRNA	standard	MIMAT0025720	gga-miR-6624-3p
800	gga-miR-6625-5p	UGGGGGAACUGGAAGCAAGAGU	experimental		gga-miR-6625-5p	mature miRNA	standard	MIMAT0025721	gga-miR-6625-5p
801	gga-miR-6626-5p	AGGAGAGAGAAGGGUUGCU	experimental		gga-miR-6626-5p	mature miRNA	standard	MIMAT0025722	gga-miR-6626-5p
802	gga-miR-6627-3p	GGAAUGAAGGUGAUGCUGUGGA	experimental		gga-miR-6627-3p	mature miRNA	standard	MIMAT0025723	gga-miR-6627-3p
803	gga-miR-6628-3p	CAGAAGUCGUGGCCUGGCACA	experimental		gga-miR-6628-3p	mature miRNA	standard	MIMAT0025724	gga-miR-6628-3p
804	gga-miR-6629-5p	CUGGGAACUUGAGGCAGCUGUUGAGU	experimental		gga-miR-6629-5p	mature miRNA	standard	MIMAT0025725	gga-miR-6629-5p
805	gga-miR-6630-3p	CUGCACAAACCGAAGGCUUUUU	experimental		gga-miR-6630-3p	mature miRNA	standard	MIMAT0025726	gga-miR-6630-3p
806	gga-miR-6631-5p	GAAGAGAAUGCUGUGGUUCUGC	experimental		gga-miR-6631-5p	mature miRNA	standard	MIMAT0025727	gga-miR-6631-5p
807	gga-miR-6632-5p	AGAGAUGAGAGGAGUGGAUGACAGC	experimental		gga-miR-6632-5p	mature miRNA	standard	MIMAT0025728	gga-miR-6632-5p
808	gga-miR-6633-5p	AGAGGAAACUAUGGCUGACUGU	experimental		gga-miR-6633-5p	mature miRNA	standard	MIMAT0025729	gga-miR-6633-5p
809	gga-miR-6634-5p	UCUCAGGGUUCUGAAGGAGCUGGC	experimental		gga-miR-6634-5p	mature miRNA	standard	MIMAT0025730	gga-miR-6634-5p
810	gga-miR-6635-5p	GUGAAGGAUCAGAACAGCGUGCUU	experimental		gga-miR-6635-5p	mature miRNA	standard	MIMAT0025731	gga-miR-6635-5p
811	gga-miR-6637-3p	GCUGGGCUGUGCCUGCAAUCGGU	experimental		gga-miR-6637-3p	mature miRNA	standard	MIMAT0025733	gga-miR-6637-3p
812	gga-miR-6639-5p	UACAGAACUUCGGCAUGAUUGCU	experimental		gga-miR-6639-5p	mature miRNA	standard	MIMAT0025735	gga-miR-6639-5p
813	gga-miR-6640-5p	UCUGGAAUUGUAGUAGAGUGUAU	experimental		gga-miR-6640-5p	mature miRNA	standard	MIMAT0025736	gga-miR-6640-5p
814	gga-miR-6641-3p	CUGCUGGGAGAAAAAAGCUAU	experimental		gga-miR-6641-3p	mature miRNA	standard	MIMAT0025738	gga-miR-6641-3p
815	gga-miR-6641-5p	ACAGCUUUUUUAUUUCCAGUUA	experimental		gga-miR-6641-5p	mature miRNA	standard	MIMAT0025737	gga-miR-6641-5p
816	gga-miR-6642-3p	CGGGCGGCCGUCGGGGAAAGCGG	experimental		gga-miR-6642-3p	mature miRNA	standard	MIMAT0025740	gga-miR-6642-3p
817	gga-miR-6642-5p	UUCCCCGACGGCCGAGCGGGCC	experimental		gga-miR-6642-5p	mature miRNA	standard	MIMAT0025739	gga-miR-6642-5p
818	gga-miR-6643-5p	CCAGGGCUGGCAGGGGAGGGU	experimental		gga-miR-6643-5p	mature miRNA	standard	MIMAT0025741	gga-miR-6643-5p
819	gga-miR-6644-3p	GGGGCUAAGAUGGUACAGCGGA	experimental		gga-miR-6644-3p	mature miRNA	standard	MIMAT0025745	gga-miR-6644-3p
820	gga-miR-6645-5p	UGGGAGGUAGCAGUGGUGGUGA	experimental		gga-miR-6645-5p	mature miRNA	standard	MIMAT0025742	gga-miR-6645-5p
821	gga-miR-6646-3p	UCUGGUGGUAGCAGCUGGAAGG	experimental		gga-miR-6646-3p	mature miRNA	standard	MIMAT0025743	gga-miR-6646-3p
822	gga-miR-6647-5p	CGCUCUGGCCAUGUGACGCAGCU	experimental		gga-miR-6647-5p	mature miRNA	standard	MIMAT0025744	gga-miR-6647-5p
823	gga-miR-6648-3p	UCCGGCAUUCUGAACGCUCCU	experimental		gga-miR-6648-3p	mature miRNA	standard	MIMAT0025747	gga-miR-6648-3p
824	gga-miR-6648-5p	AGGAGCGUUCAGAAUGCCGGUG	experimental		gga-miR-6648-5p	mature miRNA	standard	MIMAT0025746	gga-miR-6648-5p
825	gga-miR-6649-3p	UGCUGGCAGUGCUGUGGUAGUG	experimental		gga-miR-6649-3p	mature miRNA	standard	MIMAT0025749	gga-miR-6649-3p
826	gga-miR-6649-5p	UUUAUCACAUCAAUGCCAAGCAG	experimental		gga-miR-6649-5p	mature miRNA	standard	MIMAT0025748	gga-miR-6649-5p
827	gga-miR-6650-5p	AGCCAGCAGAAGAGCAACUGGGCA	experimental		gga-miR-6650-5p	mature miRNA	standard	MIMAT0025750	gga-miR-6650-5p
828	gga-miR-6651-5p	ACCAGGUUGCCUAAGGAGGGG	experimental		gga-miR-6651-5p	mature miRNA	standard	MIMAT0025751	gga-miR-6651-5p
829	gga-miR-6652-5p	UGGGUGUAUGUGGGACAGCUC	experimental		gga-miR-6652-5p	mature miRNA	standard	MIMAT0025752	gga-miR-6652-5p
830	gga-miR-6653-3p	CGCGGGAUGCAGAGCAGGCGC	experimental		gga-miR-6653-3p	mature miRNA	standard	MIMAT0025754	gga-miR-6653-3p
831	gga-miR-6654-3p	UCAGCACUGGGGCUGAGCUGGCA	experimental		gga-miR-6654-3p	mature miRNA	standard	MIMAT0025755	gga-miR-6654-3p
832	gga-miR-6655-5p	UCUGCUAGGAGGCUGUGUAUCCU	experimental		gga-miR-6655-5p	mature miRNA	standard	MIMAT0025756	gga-miR-6655-5p
833	gga-miR-6656-5p	UGCAGGGCGAGUAGAGAAAGGCAU	experimental		gga-miR-6656-5p	mature miRNA	standard	MIMAT0025757	gga-miR-6656-5p
834	gga-miR-6657-3p	ACAUGGUGGGAGAAGGGUGAC	experimental		gga-miR-6657-3p	mature miRNA	standard	MIMAT0025758	gga-miR-6657-3p
835	gga-miR-6658-3p	CAUGGACGGGGGAAGGAGAUAGC	experimental		gga-miR-6658-3p	mature miRNA	standard	MIMAT0025759	gga-miR-6658-3p
836	gga-miR-6659-3p	UUUGGCUGCCAUCGGACCUGGU	experimental		gga-miR-6659-3p	mature miRNA	standard	MIMAT0025760	gga-miR-6659-3p
837	gga-miR-6660-3p	UCUGACAUGGCUCUGCUCCGCAGU	experimental		gga-miR-6660-3p	mature miRNA	standard	MIMAT0025761	gga-miR-6660-3p
838	gga-miR-6661-5p	AGGGCUGCAGCAUGCAGAAGCU	experimental		gga-miR-6661-5p	mature miRNA	standard	MIMAT0025762	gga-miR-6661-5p
839	gga-miR-6662-3p	AAUGGUUGACCAGUGGCUGAAC	experimental		gga-miR-6662-3p	mature miRNA	standard	MIMAT0025763	gga-miR-6662-3p
840	gga-miR-6663-5p	AUUGCUGUGUGAGGAGUGCUG	experimental		gga-miR-6663-5p	mature miRNA	standard	MIMAT0025764	gga-miR-6663-5p
841	gga-miR-6664-3p	CAGGAAUGGUGCUGGAGGCUGA	experimental		gga-miR-6664-3p	mature miRNA	standard	MIMAT0025765	gga-miR-6664-3p
842	gga-miR-6665-5p	UGCCUGAAGGAUUUUGAUGCCC	experimental		gga-miR-6665-5p	mature miRNA	standard	MIMAT0025766	gga-miR-6665-5p
843	gga-miR-6666-3p	UCGGGUGAUGAGGACAGGAGGA	experimental		gga-miR-6666-3p	mature miRNA	standard	MIMAT0025767	gga-miR-6666-3p
844	gga-miR-6667-5p	AGGGAAGGUGGCAAGCAUGUU	experimental		gga-miR-6667-5p	mature miRNA	standard	MIMAT0025768	gga-miR-6667-5p
845	gga-miR-6668-3p	UGGAAUCGUGGAAUAGCUUGGGU	experimental		gga-miR-6668-3p	mature miRNA	standard	MIMAT0025769	gga-miR-6668-3p
846	gga-miR-6669-3p	UUGCAGCCUGGCCGUAUCUCAG	experimental		gga-miR-6669-3p	mature miRNA	standard	MIMAT0025771	gga-miR-6669-3p
847	gga-miR-6669-5p	GGUGAUACGGGAGCAAGGCUGCAU	experimental		gga-miR-6669-5p	mature miRNA	standard	MIMAT0025770	gga-miR-6669-5p
848	gga-miR-6670-5p	GUGGAAUGAUGAUCUAUAUUCUGAGU	experimental		gga-miR-6670-5p	mature miRNA	standard	MIMAT0025772	gga-miR-6670-5p
849	gga-miR-6671-5p	UGUCCUGGAGUCUCGUGCACAC	experimental		gga-miR-6671-5p	mature miRNA	standard	MIMAT0025773	gga-miR-6671-5p
850	gga-miR-6672-3p	UGGGCACAAACUGGAAGACA	experimental		gga-miR-6672-3p	mature miRNA	standard	MIMAT0025774	gga-miR-6672-3p
851	gga-miR-6673-3p	ACCUGAGAAUGAGAUGUGCUGU	experimental		gga-miR-6673-3p	mature miRNA	standard	MIMAT0025775	gga-miR-6673-3p
852	gga-miR-6674-3p	CAGGUGUCUGUGGCAGCCUCA	experimental		gga-miR-6674-3p	mature miRNA	standard	MIMAT0025776	gga-miR-6674-3p
853	gga-miR-6675-3p	UCUCUGGACGUCACGUGUGAGG	experimental		gga-miR-6675-3p	mature miRNA	standard	MIMAT0025778	gga-miR-6675-3p
854	gga-miR-6675-5p	AUACGUGAGGUUCAUUGGGUUC	experimental		gga-miR-6675-5p	mature miRNA	standard	MIMAT0025777	gga-miR-6675-5p
855	gga-miR-6676-3p	GCCCAAUGAUGUCUCUGAGGGGG	experimental		gga-miR-6676-3p	mature miRNA	standard	MIMAT0025779	gga-miR-6676-3p
856	gga-miR-6677-3p	UGCUCAGACACGUCAGGAGGA	experimental		gga-miR-6677-3p	mature miRNA	standard	MIMAT0025781	gga-miR-6677-3p
857	gga-miR-6677-5p	CUCACUGCCUGCCCUGAGCACACCA	experimental		gga-miR-6677-5p	mature miRNA	standard	MIMAT0025780	gga-miR-6677-5p
858	gga-miR-6678-3p	UACCUUGGACUUCUGAAGGGCA	experimental		gga-miR-6678-3p	mature miRNA	standard	MIMAT0025782	gga-miR-6678-3p
859	gga-miR-6679-5p	UGGAAGAUAUGGUCAUCACUCUGU	experimental		gga-miR-6679-5p	mature miRNA	standard	MIMAT0025783	gga-miR-6679-5p
860	gga-miR-6680-3p	GUUGCUGAUGAAGAUACUGAAU	experimental		gga-miR-6680-3p	mature miRNA	standard	MIMAT0025784	gga-miR-6680-3p
861	gga-miR-6681-5p	UCUGGAUCGAGAAAUUCAGCAU	experimental		gga-miR-6681-5p	mature miRNA	standard	MIMAT0025786	gga-miR-6681-5p
862	gga-miR-6682-3p	UGGAACAAAGUAGGUGGCGUGC	experimental		gga-miR-6682-3p	mature miRNA	standard	MIMAT0025787	gga-miR-6682-3p
863	gga-miR-6683-3p	UCAGAGCCUGGGAGUAAACGU	experimental		gga-miR-6683-3p	mature miRNA	standard	MIMAT0025788	gga-miR-6683-3p
864	gga-miR-6684-5p	UUUGCUGCACUGAAGAUG	experimental		gga-miR-6684-5p	mature miRNA	standard	MIMAT0025789	gga-miR-6684-5p
865	gga-miR-6685-3p	UGGUGACGCGGGCAUUGCUGC	experimental		gga-miR-6685-3p	mature miRNA	standard	MIMAT0025791	gga-miR-6685-3p
866	gga-miR-6685-5p	CAGCAAUGCACGUGUACUCAG	experimental		gga-miR-6685-5p	mature miRNA	standard	MIMAT0025790	gga-miR-6685-5p
867	gga-miR-6686-3p	AGGGCAAUCCUGGAGACGCUGA	experimental		gga-miR-6686-3p	mature miRNA	standard	MIMAT0025792	gga-miR-6686-3p
868	gga-miR-6687-3p	AGCGACUGCCGGGAGGGGCUCGC	experimental		gga-miR-6687-3p	mature miRNA	standard	MIMAT0025793	gga-miR-6687-3p
869	gga-miR-6688-3p	UGAGUCACCUGAGGAGGCUUUU	experimental		gga-miR-6688-3p	mature miRNA	standard	MIMAT0025794	gga-miR-6688-3p
870	gga-miR-6689-3p	UGAUGGCGCUCGCAGAACUGCA	experimental		gga-miR-6689-3p	mature miRNA	standard	MIMAT0025795	gga-miR-6689-3p
871	gga-miR-6690-5p	UCAGAAGGGGAUGGCUUUGGCUC	experimental		gga-miR-6690-5p	mature miRNA	standard	MIMAT0025796	gga-miR-6690-5p
872	gga-miR-6691-5p	GUGCAUGAUGAACCUGCUGAGC	experimental		gga-miR-6691-5p	mature miRNA	standard	MIMAT0025797	gga-miR-6691-5p
873	gga-miR-6692-5p	UUUAGUAGUUGAUAGGUGUGUUUGGA	experimental		gga-miR-6692-5p	mature miRNA	standard	MIMAT0025798	gga-miR-6692-5p
874	gga-miR-6693-3p	UUUUCAGUCUGACACAGAACAU	experimental		gga-miR-6693-3p	mature miRNA	standard	MIMAT0025799	gga-miR-6693-3p
875	gga-miR-6694-3p	UUAAGAGUAGGGAUUCUGUUCC	experimental		gga-miR-6694-3p	mature miRNA	standard	MIMAT0025800	gga-miR-6694-3p
876	gga-miR-6695-5p	UUGGGAAGGAACAAAGCAUGACUU	experimental		gga-miR-6695-5p	mature miRNA	standard	MIMAT0025801	gga-miR-6695-5p
877	gga-miR-6696-3p	GGGAGACUUGCCUGAUAACAGCU	experimental		gga-miR-6696-3p	mature miRNA	standard	MIMAT0025803	gga-miR-6696-3p
878	gga-miR-6696-5p	AGCUGUGAUCUCAAGCCCCCAC	experimental		gga-miR-6696-5p	mature miRNA	standard	MIMAT0025802	gga-miR-6696-5p
879	gga-miR-6697-5p	UCCAAGAACAGAUGACAUCAGC	experimental		gga-miR-6697-5p	mature miRNA	standard	MIMAT0025804	gga-miR-6697-5p
880	gga-miR-6698-3p	UUAGGAGAGAGUGAGAAGUAAGU	experimental		gga-miR-6698-3p	mature miRNA	standard	MIMAT0025805	gga-miR-6698-3p
881	gga-miR-6699-5p	UGAAGACCUCGUGCAUUGUAGC	experimental		gga-miR-6699-5p	mature miRNA	standard	MIMAT0025808	gga-miR-6699-5p
882	gga-miR-6700-3p	UCACUCUCUAGAACUACUCAAAGG	experimental		gga-miR-6700-3p	mature miRNA	standard	MIMAT0025810	gga-miR-6700-3p
883	gga-miR-6700-5p	CUGGGAUUGUUCAGGAGAGGAGGC	experimental		gga-miR-6700-5p	mature miRNA	standard	MIMAT0025809	gga-miR-6700-5p
884	gga-miR-6701-3p	AUUAUUUUACAGACAGAUCGC	experimental		gga-miR-6701-3p	mature miRNA	standard	MIMAT0025811	gga-miR-6701-3p
885	gga-miR-6702-5p	CACCAGGGCAGAGUAGAGGUGUG	experimental		gga-miR-6702-5p	mature miRNA	standard	MIMAT0025812	gga-miR-6702-5p
886	gga-miR-6703-3p	CAGAGCUCUGUAGGACAGCACA	experimental		gga-miR-6703-3p	mature miRNA	standard	MIMAT0025813	gga-miR-6703-3p
887	gga-miR-6704-5p	AACACAGAGAGGGACAGAGUAG	experimental		gga-miR-6704-5p	mature miRNA	standard	MIMAT0025814	gga-miR-6704-5p
888	gga-miR-6705-5p	AAGCAAUGGGGUAAGGAACAG	experimental		gga-miR-6705-5p	mature miRNA	standard	MIMAT0025815	gga-miR-6705-5p
889	gga-miR-6706-5p	AGGAGAAAUGGAGUGGGCUGAG	experimental		gga-miR-6706-5p	mature miRNA	standard	MIMAT0025816	gga-miR-6706-5p
890	gga-miR-6707-5p	ACUGGAACAAGCUGCCUGGAGAGG	experimental		gga-miR-6707-5p	mature miRNA	standard	MIMAT0025817	gga-miR-6707-5p
891	gga-miR-6708-5p	UAUGGGAGGAGCGGUGAGCAGCA	experimental		gga-miR-6708-5p	mature miRNA	standard	MIMAT0025818	gga-miR-6708-5p
892	gga-miR-6709-5p	AGCCCGGCUGCUAACAAUGAGGAGA	experimental		gga-miR-6709-5p	mature miRNA	standard	MIMAT0025819	gga-miR-6709-5p
893	gga-miR-6710-3p	AAACUGUUCUCUUCCAUCUAG	experimental		gga-miR-6710-3p	mature miRNA	standard	MIMAT0025820	gga-miR-6710-3p
894	gga-miR-6711-5p	CACUUGGGAUUGAGAAGAAGCA	experimental		gga-miR-6711-5p	mature miRNA	standard	MIMAT0025821	gga-miR-6711-5p
895	gga-miR-6712-5p	AGUGGUGGCUGAGAACAGUGAC	experimental		gga-miR-6712-5p	mature miRNA	standard	MIMAT0025822	gga-miR-6712-5p
896	gga-miR-6713-3p	AAGAAGCUGUAAUCAUCA	experimental		gga-miR-6713-3p	mature miRNA	standard	MIMAT0025823	gga-miR-6713-3p
897	gga-miR-6714-3p	ACUUGCUGUGGAAAAGGCAUUU	experimental		gga-miR-6714-3p	mature miRNA	standard	MIMAT0025824	gga-miR-6714-3p
898	gga-miR-7437-3p	CUUCCUCCAACCUCAGUAUCA	experimental		gga-miR-7437-3p	mature miRNA	standard	MIMAT0029029	gga-miR-7437-3p
899	gga-miR-7437-5p	GAACAGAGCGUUGGAAGGUAGGG	experimental		gga-miR-7437-5p	mature miRNA	standard	MIMAT0029028	gga-miR-7437-5p
900	gga-miR-7438-3p	UGAGUUGUCUUCCUGAAUAGUU	experimental		gga-miR-7438-3p	mature miRNA	standard	MIMAT0029031	gga-miR-7438-3p
901	gga-miR-7438-5p	UUUUUCAAGGGGACAACUCAGA	experimental		gga-miR-7438-5p	mature miRNA	standard	MIMAT0029030	gga-miR-7438-5p
902	gga-miR-7439-3p	UUCUCCAGUAGUUCCUGAGUGCU	experimental		gga-miR-7439-3p	mature miRNA	standard	MIMAT0029033	gga-miR-7439-3p
903	gga-miR-7439-5p	UGACUUGGGAACAUGGGAAGAGG	experimental		gga-miR-7439-5p	mature miRNA	standard	MIMAT0029032	gga-miR-7439-5p
904	gga-miR-7440-3p	UUUGGUGUAGGCCAGGACAGC	experimental		gga-miR-7440-3p	mature miRNA	standard	MIMAT0029035	gga-miR-7440-3p
905	gga-miR-7440-5p	UGUUUGAGUGCACCUGGGU	experimental		gga-miR-7440-5p	mature miRNA	standard	MIMAT0029034	gga-miR-7440-5p
906	gga-miR-7441-3p	AUGUUGGGAUCCUCUUCUGCA	experimental		gga-miR-7441-3p	mature miRNA	standard	MIMAT0029037	gga-miR-7441-3p
907	gga-miR-7441-5p	CUGAGGAGGGUUUGUAACAUGG	experimental		gga-miR-7441-5p	mature miRNA	standard	MIMAT0029036	gga-miR-7441-5p
908	gga-miR-7442-3p	UCUGCUUCCUCCUCCUGCAGC	experimental		gga-miR-7442-3p	mature miRNA	standard	MIMAT0029039	gga-miR-7442-3p
909	gga-miR-7442-5p	CACAGGACCAUGGGAGCGUGGC	experimental		gga-miR-7442-5p	mature miRNA	standard	MIMAT0029038	gga-miR-7442-5p
910	gga-miR-7443-3p	UCCCUUGGGCUGCAGCACCCUCC	experimental		gga-miR-7443-3p	mature miRNA	standard	MIMAT0029041	gga-miR-7443-3p
911	gga-miR-7443-5p	UGGUGGCUGCCCUCAGGGAGAGC	experimental		gga-miR-7443-5p	mature miRNA	standard	MIMAT0029040	gga-miR-7443-5p
912	gga-miR-7444-3p	AGUGUUAGGUGCAGCCUUGCUG	experimental		gga-miR-7444-3p	mature miRNA	standard	MIMAT0029043	gga-miR-7444-3p
913	gga-miR-7444-5p	GUAAGGCUCCUUCUGACCUCC	experimental		gga-miR-7444-5p	mature miRNA	standard	MIMAT0029042	gga-miR-7444-5p
914	gga-miR-7445-3p	GGAUGAGUCUGUUUAACUUUAU	experimental		gga-miR-7445-3p	mature miRNA	standard	MIMAT0029045	gga-miR-7445-3p
915	gga-miR-7445-5p	AAAGUUAAACAGACUCAUCCAC	experimental		gga-miR-7445-5p	mature miRNA	standard	MIMAT0029044	gga-miR-7445-5p
916	gga-miR-7446-3p	GCGGACGUGUGAGGAGGG	experimental		gga-miR-7446-3p	mature miRNA	standard	MIMAT0029047	gga-miR-7446-3p
917	gga-miR-7446-5p	CGCCAUGUCCACCUCCGCGC	experimental		gga-miR-7446-5p	mature miRNA	standard	MIMAT0029046	gga-miR-7446-5p
918	gga-miR-7447-3p	UGAGCACUCAGCCCAACUCCUA	experimental		gga-miR-7447-3p	mature miRNA	standard	MIMAT0029049	gga-miR-7447-3p
919	gga-miR-7447-5p	AAAGUUGGUAGUGAUUGCUGAUG	experimental		gga-miR-7447-5p	mature miRNA	standard	MIMAT0029048	gga-miR-7447-5p
920	gga-miR-7448-3p	AACUGUUGUAGAACAGGAGAAGC	experimental		gga-miR-7448-3p	mature miRNA	standard	MIMAT0029051	gga-miR-7448-3p
921	gga-miR-7448-5p	CUCAUCCUCCAUGGUCUCCAGCAACGCC	experimental		gga-miR-7448-5p	mature miRNA	standard	MIMAT0029050	gga-miR-7448-5p
922	gga-miR-7449-3p	AGGGUUGGACGAGAUGGUCUUU	experimental		gga-miR-7449-3p	mature miRNA	standard	MIMAT0029053	gga-miR-7449-3p
923	gga-miR-7449-5p	AGGUCAUCUAGUCCAACUUCCC	experimental		gga-miR-7449-5p	mature miRNA	standard	MIMAT0029052	gga-miR-7449-5p
924	gga-miR-7450-3p	CCCGUUUCCUGGAAGUGAUGGAGC	experimental		gga-miR-7450-3p	mature miRNA	standard	MIMAT0029055	gga-miR-7450-3p
925	gga-miR-7450-5p	UCUGUUCUUAAGGAGGCUGAGGC	experimental		gga-miR-7450-5p	mature miRNA	standard	MIMAT0029054	gga-miR-7450-5p
926	gga-miR-7451-3p	UUGCUUCUUCUUAUCCCACAGU	experimental		gga-miR-7451-3p	mature miRNA	standard	MIMAT0029057	gga-miR-7451-3p
927	gga-miR-7451-5p	CGUGGGAAUUAAGAGUGGCAGUC	experimental		gga-miR-7451-5p	mature miRNA	standard	MIMAT0029056	gga-miR-7451-5p
928	gga-miR-7452-3p	GCGGAUUCUUGAACCAGUCCUGCUGC	experimental		gga-miR-7452-3p	mature miRNA	standard	MIMAT0029059	gga-miR-7452-3p
929	gga-miR-7452-5p	ACAGGGCUGGCUGAUCCGUGC	experimental		gga-miR-7452-5p	mature miRNA	standard	MIMAT0029058	gga-miR-7452-5p
930	gga-miR-7453-3p	CAGCUUUUCUCUCUGGCU	experimental		gga-miR-7453-3p	mature miRNA	standard	MIMAT0029061	gga-miR-7453-3p
931	gga-miR-7453-5p	UCAGAUGUGAGAACUCAGCAGCG	experimental		gga-miR-7453-5p	mature miRNA	standard	MIMAT0029060	gga-miR-7453-5p
932	gga-miR-7454-3p	ACUUUCCAGCUUGCGAAAGCAGACAG	experimental		gga-miR-7454-3p	mature miRNA	standard	MIMAT0029063	gga-miR-7454-3p
933	gga-miR-7454-5p	UUCUGUGAGACAAACUGAAGUGC	experimental		gga-miR-7454-5p	mature miRNA	standard	MIMAT0029062	gga-miR-7454-5p
934	gga-miR-7455-3p	CUUCCCUCCGUCGGCGCGCACAC	experimental		gga-miR-7455-3p	mature miRNA	standard	MIMAT0029065	gga-miR-7455-3p
935	gga-miR-7455-5p	UCGCGCGGCGCGGAGGGAGCGGG	experimental		gga-miR-7455-5p	mature miRNA	standard	MIMAT0029064	gga-miR-7455-5p
936	gga-miR-7456-3p	CAGGGAGAUGUACCUGUAGGAG	experimental		gga-miR-7456-3p	mature miRNA	standard	MIMAT0029067	gga-miR-7456-3p
937	gga-miR-7456-5p	CCUGCAGCUGCAUUUUCCCUAUG	experimental		gga-miR-7456-5p	mature miRNA	standard	MIMAT0029066	gga-miR-7456-5p
938	gga-miR-7457-3p	ACUUGGAGGCCUGUGGCUAG	experimental		gga-miR-7457-3p	mature miRNA	standard	MIMAT0029069	gga-miR-7457-3p
939	gga-miR-7457-5p	GGCAUUCAUAGGGCUGUGAUCGG	experimental		gga-miR-7457-5p	mature miRNA	standard	MIMAT0029068	gga-miR-7457-5p
940	gga-miR-7458-3p	CACUGGGAUCAUCUCAGCAGAG	experimental		gga-miR-7458-3p	mature miRNA	standard	MIMAT0029071	gga-miR-7458-3p
941	gga-miR-7458-5p	UUGCGGAACAAGUUCUCAGGGC	experimental		gga-miR-7458-5p	mature miRNA	standard	MIMAT0029070	gga-miR-7458-5p
942	gga-miR-7459-3p	UGGGAUAGUACUGUAUGAGGCGU	experimental		gga-miR-7459-3p	mature miRNA	standard	MIMAT0029073	gga-miR-7459-3p
943	gga-miR-7459-5p	GGCUUUGAGACAGUCUUUCUCAGU	experimental		gga-miR-7459-5p	mature miRNA	standard	MIMAT0029072	gga-miR-7459-5p
944	gga-miR-7460-3p	CCUGACUGAGCUCUGCUUUCUC	experimental		gga-miR-7460-3p	mature miRNA	standard	MIMAT0029075	gga-miR-7460-3p
945	gga-miR-7460-5p	GAUGGCAGAGCCCUCAGACUGAGGC	experimental		gga-miR-7460-5p	mature miRNA	standard	MIMAT0029074	gga-miR-7460-5p
946	gga-miR-7461-3p	CAUGGCUGGAAUGUGGUCAUGGAUG	experimental		gga-miR-7461-3p	mature miRNA	standard	MIMAT0029077	gga-miR-7461-3p
947	gga-miR-7461-5p	UCUGUGAUCAGGCAGGAGAUGAU	experimental		gga-miR-7461-5p	mature miRNA	standard	MIMAT0029076	gga-miR-7461-5p
948	gga-miR-7462-3p	GGAAGCUUGAAAUAAGGUUGAA	experimental		gga-miR-7462-3p	mature miRNA	standard	MIMAT0029079	gga-miR-7462-3p
949	gga-miR-7462-5p	CAACCUCAUUUCUAGCUUCUGG	experimental		gga-miR-7462-5p	mature miRNA	standard	MIMAT0029078	gga-miR-7462-5p
950	gga-miR-7463-3p	AUUACUUUCAAUGGGACUAAGU	experimental		gga-miR-7463-3p	mature miRNA	standard	MIMAT0029081	gga-miR-7463-3p
951	gga-miR-7463-5p	UGAGUCUCCUUGAAAGUAAUGG	experimental		gga-miR-7463-5p	mature miRNA	standard	MIMAT0029080	gga-miR-7463-5p
952	gga-miR-7464-3p	UGGCACUGCACUGAGUCAUUGGC	experimental		gga-miR-7464-3p	mature miRNA	standard	MIMAT0029083	gga-miR-7464-3p
953	gga-miR-7464-5p	CAAUGGCUCAGUGCAGUGCCGUU	experimental		gga-miR-7464-5p	mature miRNA	standard	MIMAT0029082	gga-miR-7464-5p
954	gga-miR-7465-3p	AGAGUGUCUGUUACCUGACC	experimental		gga-miR-7465-3p	mature miRNA	standard	MIMAT0029085	gga-miR-7465-3p
955	gga-miR-7465-5p	UCAGAUAGCUGAUACUCCGC	experimental		gga-miR-7465-5p	mature miRNA	standard	MIMAT0029084	gga-miR-7465-5p
956	gga-miR-7466-3p	UUUUCCUGUAGAGGAAGCAGGAG	experimental		gga-miR-7466-3p	mature miRNA	standard	MIMAT0029087	gga-miR-7466-3p
957	gga-miR-7466-5p	CUGGCCACUCUGGGAGGCUC	experimental		gga-miR-7466-5p	mature miRNA	standard	MIMAT0029086	gga-miR-7466-5p
958	gga-miR-7467-3p	CACCACAGCCACCACGCUGACGC	experimental		gga-miR-7467-3p	mature miRNA	standard	MIMAT0029089	gga-miR-7467-3p
959	gga-miR-7467-5p	GCCAGCGCGGUGGUGAUGGUGCC	experimental		gga-miR-7467-5p	mature miRNA	standard	MIMAT0029088	gga-miR-7467-5p
960	gga-miR-7468-3p	UGAUGGAAGAUGUUGAGCAGGCC	experimental		gga-miR-7468-3p	mature miRNA	standard	MIMAT0029091	gga-miR-7468-3p
961	gga-miR-7468-5p	UCUCACAGCUCCUUGCAUUUAG	experimental		gga-miR-7468-5p	mature miRNA	standard	MIMAT0029090	gga-miR-7468-5p
962	gga-miR-7469-3p	UUUGUGUGCUUGCAUUGCAAAGG	experimental		gga-miR-7469-3p	mature miRNA	standard	MIMAT0029093	gga-miR-7469-3p
963	gga-miR-7469-5p	UUUGCAAUGCAAUUUUACAGUAG	experimental		gga-miR-7469-5p	mature miRNA	standard	MIMAT0029092	gga-miR-7469-5p
964	gga-miR-7470-3p	CCCUGUGCUUUAGGAGAGCAAAA	experimental		gga-miR-7470-3p	mature miRNA	standard	MIMAT0029095	gga-miR-7470-3p
965	gga-miR-7470-5p	UGUGAUCUUGAAGAACGUGGGC	experimental		gga-miR-7470-5p	mature miRNA	standard	MIMAT0029094	gga-miR-7470-5p
966	gga-miR-7471-3p	CCCGAGCGGUGCUGUGGCGG	experimental		gga-miR-7471-3p	mature miRNA	standard	MIMAT0029097	gga-miR-7471-3p
967	gga-miR-7471-5p	GUCGGUGCCGUGCGGGGC	experimental		gga-miR-7471-5p	mature miRNA	standard	MIMAT0029096	gga-miR-7471-5p
968	gga-miR-7472-3p	CAGCUCCUCUCCAUCACUCUGC	experimental		gga-miR-7472-3p	mature miRNA	standard	MIMAT0029099	gga-miR-7472-3p
969	gga-miR-7472-5p	AUGUGCUGGAGAUGAAGCUGGA	experimental		gga-miR-7472-5p	mature miRNA	standard	MIMAT0029098	gga-miR-7472-5p
970	gga-miR-7473-3p	ACUUAGGCACGUAAAUCUCUCGU	experimental		gga-miR-7473-3p	mature miRNA	standard	MIMAT0029101	gga-miR-7473-3p
971	gga-miR-7473-5p	AAGAGAUUUACAUGCGUAACUCC	experimental		gga-miR-7473-5p	mature miRNA	standard	MIMAT0029100	gga-miR-7473-5p
972	gga-miR-7474-3p	AUUUGUGGUUCCUACUCCGCCAAA	experimental		gga-miR-7474-3p	mature miRNA	standard	MIMAT0029103	gga-miR-7474-3p
973	gga-miR-7474-5p	GUACGGAGUUGGUGAACCACUGG	experimental		gga-miR-7474-5p	mature miRNA	standard	MIMAT0029102	gga-miR-7474-5p
974	gga-miR-7475-3p	ACGGGCGGGUGGGCGCGGU	experimental		gga-miR-7475-3p	mature miRNA	standard	MIMAT0029105	gga-miR-7475-3p
975	gga-miR-7475-5p	CCGCCGCCGCCGCGCCCUCC	experimental		gga-miR-7475-5p	mature miRNA	standard	MIMAT0029104	gga-miR-7475-5p
976	gga-miR-7476-3p	UCACAACAGUGGGCUGAAUGC	experimental		gga-miR-7476-3p	mature miRNA	standard	MIMAT0029107	gga-miR-7476-3p
977	gga-miR-7476-5p	UCUUAGCUCAUCUGAUGUGAAG	experimental		gga-miR-7476-5p	mature miRNA	standard	MIMAT0029106	gga-miR-7476-5p
978	gga-miR-7477-3p	UACCGCCCCGUUCUGCGCUCGGA	experimental		gga-miR-7477-3p	mature miRNA	standard	MIMAT0029109	gga-miR-7477-3p
979	gga-miR-7477-5p	ACAGCGCGGAUCGGGGCUGGGAG	experimental		gga-miR-7477-5p	mature miRNA	standard	MIMAT0029108	gga-miR-7477-5p
980	gga-miR-7478-3p	CUACAUGCACGGGCAGGUGAG	experimental		gga-miR-7478-3p	mature miRNA	standard	MIMAT0029111	gga-miR-7478-3p
981	gga-miR-7478-5p	UACCUGUGUGACUGUGGAGAGGA	experimental		gga-miR-7478-5p	mature miRNA	standard	MIMAT0029110	gga-miR-7478-5p
982	gga-miR-7479-3p	GUAGAUGUCAUGUCAUGACUGGC	experimental		gga-miR-7479-3p	mature miRNA	standard	MIMAT0029113	gga-miR-7479-3p
983	gga-miR-7479-5p	UAGUAAGCAGAGAUUUGCUA	experimental		gga-miR-7479-5p	mature miRNA	standard	MIMAT0029112	gga-miR-7479-5p
984	gga-miR-7480-3p	UUCUCUAAAGCGUGGACAGACA	experimental		gga-miR-7480-3p	mature miRNA	standard	MIMAT0029115	gga-miR-7480-3p
985	gga-miR-7480-5p	UUCUGAACGAGACUGAAGGAAGC	experimental		gga-miR-7480-5p	mature miRNA	standard	MIMAT0029114	gga-miR-7480-5p
986	gga-miR-7481-3p	UUCAGCUCUGGUCUGGGGAAGGA	experimental		gga-miR-7481-3p	mature miRNA	standard	MIMAT0029117	gga-miR-7481-3p
987	gga-miR-7481-5p	CUUUCCUGUAGGAGCCAGGAAGA	experimental		gga-miR-7481-5p	mature miRNA	standard	MIMAT0029116	gga-miR-7481-5p
988	gga-miR-7482-3p	UCUGCAGACACACAAGCCAGAGA	experimental		gga-miR-7482-3p	mature miRNA	standard	MIMAT0029119	gga-miR-7482-3p
989	gga-miR-7482-5p	CCUGGGCUUGUUCACUCACCAGAGA	experimental		gga-miR-7482-5p	mature miRNA	standard	MIMAT0029118	gga-miR-7482-5p
990	gga-miR-7483-3p	GCCAUAAGUACCUGCAAGGCAA	experimental		gga-miR-7483-3p	mature miRNA	standard	MIMAT0029121	gga-miR-7483-3p
991	gga-miR-7483-5p	GCAUGGUGUAGUGACGCAGGCAG	experimental		gga-miR-7483-5p	mature miRNA	standard	MIMAT0029120	gga-miR-7483-5p
992	BKG0		control	control_empty		LC Internal Use	control
993	PUC2PM		control	control_spike_calibration		LC Internal Use	control
994	PUC2MM		control	control_spike_calibration		LC Internal Use	control
995	a-PUC2PM		control	control_spike_calibration		LC Internal Use	control
996	a-PUC2MM2d		control	control_spike_calibration		LC Internal Use	control
997	PUC2PM-20B		control	control_spike_calibration		LC Internal Use	control
998	PUC2MM-20B		control	control_spike_calibration		LC Internal Use	control
999	a2-PUC2PM-20B		control	control_spike_calibration		LC Internal Use	control
1000	a2-PUC2MM-20B		control	control_spike_calibration		LC Internal Use	control
1001	a3-PUC2PM-20B		control	control_spike_calibration		LC Internal Use	control
1002	a3-PUC2MM-20B		control	control_spike_calibration		LC Internal Use	control
1003	Ctr01-3P		control	control_spike_calibration		LC Internal Use	control
1004	Ctr01-3M05		control	control_spike_calibration		LC Internal Use	control
1005	Ctr01-3M10		control	control_spike_calibration		LC Internal Use	control
1006	Ctr02-3P		control	control_spike_calibration		LC Internal Use	control
1007	Ctr02-3M05		control	control_spike_calibration		LC Internal Use	control
1008	Ctr02-3M10		control	control_spike_calibration		LC Internal Use	control
1009	Ctr03-3P		control	control_spike_calibration		LC Internal Use	control
1010	Ctr03-3M05		control	control_spike_calibration		LC Internal Use	control
1011	Ctr03-3M10		control	control_spike_calibration		LC Internal Use	control
1012	Ctr04-3P		control	control_spike_calibration		LC Internal Use	control
1013	Ctr04-3M05		control	control_spike_calibration		LC Internal Use	control
1014	Ctr04-3M10		control	control_spike_calibration		LC Internal Use	control
1015	Ctr05-3P		control	control_spike_calibration		LC Internal Use	control
1016	Ctr05-3M05		control	control_spike_calibration		LC Internal Use	control
1017	Ctr05-3M10		control	control_spike_calibration		LC Internal Use	control
1018	Ctr06-3P		control	control_spike_calibration		LC Internal Use	control
1019	Ctr06-3M05		control	control_spike_calibration		LC Internal Use	control
1020	Ctr06-3M10		control	control_spike_calibration		LC Internal Use	control
1021	Ctr07-3P		control	control_spike_calibration		LC Internal Use	control
1022	Ctr07-3M05		control	control_spike_calibration		LC Internal Use	control
1023	Ctr07-3M10		control	control_spike_calibration		LC Internal Use	control
1024	Ctr08-3P		control	control_spike_calibration		LC Internal Use	control
1025	Ctr08-3M05		control	control_spike_calibration		LC Internal Use	control
1026	Ctr08-3M10		control	control_spike_calibration		LC Internal Use	control
1027	Ctr09-3P		control	control_spike_calibration		LC Internal Use	control
1028	Ctr09-3M05		control	control_spike_calibration		LC Internal Use	control
1029	Ctr09-3M10		control	control_spike_calibration		LC Internal Use	control
1030	Ctr10-3P		control	control_spike_calibration		LC Internal Use	control
1031	Ctr10-3M05		control	control_spike_calibration		LC Internal Use	control
1032	Ctr10-3M10		control	control_spike_calibration		LC Internal Use	control
1033	Ctr11-3P		control	control_spike_calibration		LC Internal Use	control
1034	Ctr11-3M05		control	control_spike_calibration		LC Internal Use	control
1035	Ctr11-3M10		control	control_spike_calibration		LC Internal Use	control
1036	gga-5S-b1	GCCUACGGCCAUACCACCCUGG	control	control_biosequence		LC Internal Use	control
1037	gga-5S-b2	GGAAACGCCCGAUCUCGUCUGA	control	control_biosequence		LC Internal Use	control
1038	gga-5S-b3	GAUCUCGGAAGCUAAGCAGGGU	control	control_biosequence		LC Internal Use	control
1039	gga-5S-b4	GUCGGGCUCGGUUAGUACUUGG	control	control_biosequence		LC Internal Use	control
1040	gga-5S-b5	GGAUGGGAGACUGCCUGGGAAU	control	control_biosequence		LC Internal Use	control
1041	gga-5S-b6	GAAUACCGAGUGUCGUAGGCGU	control	control_biosequence		LC Internal Use	control

## Sheet: Array Layout
ChipVersion=G1.2		LayoutFormat=5
Block=1
R\C	C1	C2	C3	C4	C5	C6	C7	C8	C9	C10	C11	C12	C13	C14	C15	C16	C17	C18	C19	C20	C21	C22	C23	C24	C25	C26	C27	C28	C29	C30	C31
R001	BKG0										BKG0										BKG0										BKG0	R001
R002	PUC2PM										PUC2PM										PUC2PM										PUC2PM	R002
R003	PUC2MM										PUC2MM										PUC2MM										PUC2MM	R003
R004	BKG0										BKG0										BKG0										BKG0	R004
R005	PUC2PM-20B										PUC2PM-20B										PUC2PM-20B										PUC2PM-20B	R005
R006	PUC2MM-20B										PUC2MM-20B										PUC2MM-20B										PUC2MM-20B	R006
R007	a2-PUC2PM-20B										a2-PUC2PM-20B										a2-PUC2PM-20B										a2-PUC2PM-20B	R007
R008	a2-PUC2MM-20B										a2-PUC2MM-20B										a2-PUC2MM-20B										a2-PUC2MM-20B	R008
R009	a3-PUC2PM-20B	gga-let-7a-2-3p	gga-miR-153-5p	gga-miR-1632-5p	gga-miR-1719	gga-miR-1805-3p	gga-miR-29c-3p	gga-miR-6546-3p	gga-miR-6614-3p	gga-miR-7437-3p	a3-PUC2PM-20B	gga-let-7a-2-3p	gga-miR-153-5p	gga-miR-1632-5p	gga-miR-1719	gga-miR-1805-3p	gga-miR-29c-3p	gga-miR-6546-3p	gga-miR-6614-3p	gga-miR-7437-3p	a3-PUC2PM-20B	gga-let-7a-2-3p	gga-miR-153-5p	gga-miR-1632-5p	gga-miR-1719	gga-miR-1805-3p	gga-miR-29c-3p	gga-miR-6546-3p	gga-miR-6614-3p	gga-miR-7437-3p	a3-PUC2PM-20B	R009
R010	a3-PUC2MM-20B	gga-let-7a-3p	gga-miR-155	gga-miR-1633	gga-miR-1720-3p	gga-miR-1805-5p	gga-miR-29c-5p	gga-miR-6546-5p	gga-miR-6615-3p	gga-miR-7437-5p	a3-PUC2MM-20B	gga-let-7a-3p	gga-miR-155	gga-miR-1633	gga-miR-1720-3p	gga-miR-1805-5p	gga-miR-29c-5p	gga-miR-6546-5p	gga-miR-6615-3p	gga-miR-7437-5p	a3-PUC2MM-20B	gga-let-7a-3p	gga-miR-155	gga-miR-1633	gga-miR-1720-3p	gga-miR-1805-5p	gga-miR-29c-5p	gga-miR-6546-5p	gga-miR-6615-3p	gga-miR-7437-5p	a3-PUC2MM-20B	R010
R011		gga-let-7a-5p	gga-miR-1550-3p	gga-miR-1634	gga-miR-1720-5p	gga-miR-1806	gga-miR-301a-3p	gga-miR-6547-3p	gga-miR-6615-5p	gga-miR-7438-3p		gga-let-7a-5p	gga-miR-1550-3p	gga-miR-1634	gga-miR-1720-5p	gga-miR-1806	gga-miR-301a-3p	gga-miR-6547-3p	gga-miR-6615-5p	gga-miR-7438-3p		gga-let-7a-5p	gga-miR-1550-3p	gga-miR-1634	gga-miR-1720-5p	gga-miR-1806	gga-miR-301a-3p	gga-miR-6547-3p	gga-miR-6615-5p	gga-miR-7438-3p		R011
R012		gga-let-7b	gga-miR-1550-5p	gga-miR-1635	gga-miR-1721	gga-miR-1807	gga-miR-301a-5p	gga-miR-6547-5p	gga-miR-6616-5p	gga-miR-7438-5p		gga-let-7b	gga-miR-1550-5p	gga-miR-1635	gga-miR-1721	gga-miR-1807	gga-miR-301a-5p	gga-miR-6547-5p	gga-miR-6616-5p	gga-miR-7438-5p		gga-let-7b	gga-miR-1550-5p	gga-miR-1635	gga-miR-1721	gga-miR-1807	gga-miR-301a-5p	gga-miR-6547-5p	gga-miR-6616-5p	gga-miR-7438-5p		R012
R013		gga-let-7c-3p	gga-miR-1551-3p	gga-miR-1636	gga-miR-1722-3p	gga-miR-1808	gga-miR-301b-3p	gga-miR-6548-3p	gga-miR-6617-3p	gga-miR-7439-3p		gga-let-7c-3p	gga-miR-1551-3p	gga-miR-1636	gga-miR-1722-3p	gga-miR-1808	gga-miR-301b-3p	gga-miR-6548-3p	gga-miR-6617-3p	gga-miR-7439-3p		gga-let-7c-3p	gga-miR-1551-3p	gga-miR-1636	gga-miR-1722-3p	gga-miR-1808	gga-miR-301b-3p	gga-miR-6548-3p	gga-miR-6617-3p	gga-miR-7439-3p		R013
R014		gga-let-7c-5p	gga-miR-1551-5p	gga-miR-1637	gga-miR-1722-5p	gga-miR-1809	gga-miR-301b-5p	gga-miR-6548-5p	gga-miR-6618-5p	gga-miR-7439-5p		gga-let-7c-5p	gga-miR-1551-5p	gga-miR-1637	gga-miR-1722-5p	gga-miR-1809	gga-miR-301b-5p	gga-miR-6548-5p	gga-miR-6618-5p	gga-miR-7439-5p		gga-let-7c-5p	gga-miR-1551-5p	gga-miR-1637	gga-miR-1722-5p	gga-miR-1809	gga-miR-301b-5p	gga-miR-6548-5p	gga-miR-6618-5p	gga-miR-7439-5p		R014
R015	gga-5S-b1	gga-let-7d	gga-miR-1552-3p	gga-miR-1638	gga-miR-1723	gga-miR-1811	gga-miR-302a	gga-miR-6549-3p	gga-miR-6619-5p	gga-miR-7440-3p	gga-5S-b1	gga-let-7d	gga-miR-1552-3p	gga-miR-1638	gga-miR-1723	gga-miR-1811	gga-miR-302a	gga-miR-6549-3p	gga-miR-6619-5p	gga-miR-7440-3p	gga-5S-b1	gga-let-7d	gga-miR-1552-3p	gga-miR-1638	gga-miR-1723	gga-miR-1811	gga-miR-302a	gga-miR-6549-3p	gga-miR-6619-5p	gga-miR-7440-3p	gga-5S-b1	R015
R016	gga-5S-b2	gga-let-7f-3p	gga-miR-1552-5p	gga-miR-1639	gga-miR-1724	gga-miR-1812-3p	gga-miR-302b-3p	gga-miR-6549-5p	gga-miR-6620-5p	gga-miR-7440-5p	gga-5S-b2	gga-let-7f-3p	gga-miR-1552-5p	gga-miR-1639	gga-miR-1724	gga-miR-1812-3p	gga-miR-302b-3p	gga-miR-6549-5p	gga-miR-6620-5p	gga-miR-7440-5p	gga-5S-b2	gga-let-7f-3p	gga-miR-1552-5p	gga-miR-1639	gga-miR-1724	gga-miR-1812-3p	gga-miR-302b-3p	gga-miR-6549-5p	gga-miR-6620-5p	gga-miR-7440-5p	gga-5S-b2	R016
R017	gga-5S-b3	gga-let-7f-5p	gga-miR-1553-3p	gga-miR-1640	gga-miR-1725	gga-miR-1812-5p	gga-miR-302b-5p	gga-miR-6550-3p	gga-miR-6621-5p	gga-miR-7441-3p	gga-5S-b3	gga-let-7f-5p	gga-miR-1553-3p	gga-miR-1640	gga-miR-1725	gga-miR-1812-5p	gga-miR-302b-5p	gga-miR-6550-3p	gga-miR-6621-5p	gga-miR-7441-3p	gga-5S-b3	gga-let-7f-5p	gga-miR-1553-3p	gga-miR-1640	gga-miR-1725	gga-miR-1812-5p	gga-miR-302b-5p	gga-miR-6550-3p	gga-miR-6621-5p	gga-miR-7441-3p	gga-5S-b3	R017
R018	gga-5S-b4	gga-let-7g-3p	gga-miR-1553-5p	gga-miR-1641	gga-miR-1726	gga-miR-1813	gga-miR-302c-3p	gga-miR-6550-5p	gga-miR-6622-3p	gga-miR-7441-5p	gga-5S-b4	gga-let-7g-3p	gga-miR-1553-5p	gga-miR-1641	gga-miR-1726	gga-miR-1813	gga-miR-302c-3p	gga-miR-6550-5p	gga-miR-6622-3p	gga-miR-7441-5p	gga-5S-b4	gga-let-7g-3p	gga-miR-1553-5p	gga-miR-1641	gga-miR-1726	gga-miR-1813	gga-miR-302c-3p	gga-miR-6550-5p	gga-miR-6622-3p	gga-miR-7441-5p	gga-5S-b4	R018
R019	gga-5S-b5	gga-let-7g-5p	gga-miR-1554	gga-miR-1642	gga-miR-1727	gga-miR-1814	gga-miR-302c-5p	gga-miR-6551-3p	gga-miR-6623-3p	gga-miR-7442-3p	gga-5S-b5	gga-let-7g-5p	gga-miR-1554	gga-miR-1642	gga-miR-1727	gga-miR-1814	gga-miR-302c-5p	gga-miR-6551-3p	gga-miR-6623-3p	gga-miR-7442-3p	gga-5S-b5	gga-let-7g-5p	gga-miR-1554	gga-miR-1642	gga-miR-1727	gga-miR-1814	gga-miR-302c-5p	gga-miR-6551-3p	gga-miR-6623-3p	gga-miR-7442-3p	gga-5S-b5	R019
R020	gga-5S-b6	gga-let-7i	gga-miR-1555-3p	gga-miR-1643-3p	gga-miR-1728-3p	gga-miR-1815	gga-miR-302d	gga-miR-6551-5p	gga-miR-6624-3p	gga-miR-7442-5p	gga-5S-b6	gga-let-7i	gga-miR-1555-3p	gga-miR-1643-3p	gga-miR-1728-3p	gga-miR-1815	gga-miR-302d	gga-miR-6551-5p	gga-miR-6624-3p	gga-miR-7442-5p	gga-5S-b6	gga-let-7i	gga-miR-1555-3p	gga-miR-1643-3p	gga-miR-1728-3p	gga-miR-1815	gga-miR-302d	gga-miR-6551-5p	gga-miR-6624-3p	gga-miR-7442-5p	gga-5S-b6	R020
R021		gga-let-7j-3p	gga-miR-1555-5p	gga-miR-1643-5p	gga-miR-1728-5p	gga-miR-1816	gga-miR-3064-3p	gga-miR-6552-3p	gga-miR-6625-5p	gga-miR-7443-3p		gga-let-7j-3p	gga-miR-1555-5p	gga-miR-1643-5p	gga-miR-1728-5p	gga-miR-1816	gga-miR-3064-3p	gga-miR-6552-3p	gga-miR-6625-5p	gga-miR-7443-3p		gga-let-7j-3p	gga-miR-1555-5p	gga-miR-1643-5p	gga-miR-1728-5p	gga-miR-1816	gga-miR-3064-3p	gga-miR-6552-3p	gga-miR-6625-5p	gga-miR-7443-3p		R021
R022		gga-let-7k-5p	gga-miR-1556	gga-miR-1644	gga-miR-1729-3p	gga-miR-181a-3p	gga-miR-3064-5p	gga-miR-6552-5p	gga-miR-6626-5p	gga-miR-7443-5p		gga-let-7k-5p	gga-miR-1556	gga-miR-1644	gga-miR-1729-3p	gga-miR-181a-3p	gga-miR-3064-5p	gga-miR-6552-5p	gga-miR-6626-5p	gga-miR-7443-5p		gga-let-7k-5p	gga-miR-1556	gga-miR-1644	gga-miR-1729-3p	gga-miR-181a-3p	gga-miR-3064-5p	gga-miR-6552-5p	gga-miR-6626-5p	gga-miR-7443-5p		R022
R023		gga-miR-100-3p	gga-miR-1557	gga-miR-1645	gga-miR-1729-5p	gga-miR-181a-5p	gga-miR-30a-3p	gga-miR-6553-3p	gga-miR-6627-3p	gga-miR-7444-3p		gga-miR-100-3p	gga-miR-1557	gga-miR-1645	gga-miR-1729-5p	gga-miR-181a-5p	gga-miR-30a-3p	gga-miR-6553-3p	gga-miR-6627-3p	gga-miR-7444-3p		gga-miR-100-3p	gga-miR-1557	gga-miR-1645	gga-miR-1729-5p	gga-miR-181a-5p	gga-miR-30a-3p	gga-miR-6553-3p	gga-miR-6627-3p	gga-miR-7444-3p		R023
R024		gga-miR-100-5p	gga-miR-1558	gga-miR-1646	gga-miR-1730-3p	gga-miR-181b-1-3p	gga-miR-30a-5p	gga-miR-6553-5p	gga-miR-6628-3p	gga-miR-7444-5p		gga-miR-100-5p	gga-miR-1558	gga-miR-1646	gga-miR-1730-3p	gga-miR-181b-1-3p	gga-miR-30a-5p	gga-miR-6553-5p	gga-miR-6628-3p	gga-miR-7444-5p		gga-miR-100-5p	gga-miR-1558	gga-miR-1646	gga-miR-1730-3p	gga-miR-181b-1-3p	gga-miR-30a-5p	gga-miR-6553-5p	gga-miR-6628-3p	gga-miR-7444-5p		R024
R025		gga-miR-101-1-5p	gga-miR-1559-3p	gga-miR-1647	gga-miR-1730-5p	gga-miR-181b-2-3p	gga-miR-30b-3p	gga-miR-6554-3p	gga-miR-6629-5p	gga-miR-7445-3p		gga-miR-101-1-5p	gga-miR-1559-3p	gga-miR-1647	gga-miR-1730-5p	gga-miR-181b-2-3p	gga-miR-30b-3p	gga-miR-6554-3p	gga-miR-6629-5p	gga-miR-7445-3p		gga-miR-101-1-5p	gga-miR-1559-3p	gga-miR-1647	gga-miR-1730-5p	gga-miR-181b-2-3p	gga-miR-30b-3p	gga-miR-6554-3p	gga-miR-6629-5p	gga-miR-7445-3p		R025
R026		gga-miR-101-2-5p	gga-miR-1559-5p	gga-miR-1648-3p	gga-miR-1731-3p	gga-miR-181b-5p	gga-miR-30b-5p	gga-miR-6554-5p	gga-miR-6630-3p	gga-miR-7445-5p		gga-miR-101-2-5p	gga-miR-1559-5p	gga-miR-1648-3p	gga-miR-1731-3p	gga-miR-181b-5p	gga-miR-30b-5p	gga-miR-6554-5p	gga-miR-6630-3p	gga-miR-7445-5p		gga-miR-101-2-5p	gga-miR-1559-5p	gga-miR-1648-3p	gga-miR-1731-3p	gga-miR-181b-5p	gga-miR-30b-5p	gga-miR-6554-5p	gga-miR-6630-3p	gga-miR-7445-5p		R026
R027		gga-miR-101-3p	gga-miR-1560-3p	gga-miR-1648-5p	gga-miR-1731-5p	gga-miR-183	gga-miR-30c-1-3p	gga-miR-6555-3p	gga-miR-6631-5p	gga-miR-7446-3p		gga-miR-101-3p	gga-miR-1560-3p	gga-miR-1648-5p	gga-miR-1731-5p	gga-miR-183	gga-miR-30c-1-3p	gga-miR-6555-3p	gga-miR-6631-5p	gga-miR-7446-3p		gga-miR-101-3p	gga-miR-1560-3p	gga-miR-1648-5p	gga-miR-1731-5p	gga-miR-183	gga-miR-30c-1-3p	gga-miR-6555-3p	gga-miR-6631-5p	gga-miR-7446-3p		R027
R028		gga-miR-103-1-5p	gga-miR-1560-5p	gga-miR-1649-3p	gga-miR-1732	gga-miR-184-3p	gga-miR-30c-2-3p	gga-miR-6555-5p	gga-miR-6632-5p	gga-miR-7446-5p		gga-miR-103-1-5p	gga-miR-1560-5p	gga-miR-1649-3p	gga-miR-1732	gga-miR-184-3p	gga-miR-30c-2-3p	gga-miR-6555-5p	gga-miR-6632-5p	gga-miR-7446-5p		gga-miR-103-1-5p	gga-miR-1560-5p	gga-miR-1649-3p	gga-miR-1732	gga-miR-184-3p	gga-miR-30c-2-3p	gga-miR-6555-5p	gga-miR-6632-5p	gga-miR-7446-5p		R028
R029		gga-miR-103-2-5p	gga-miR-1561	gga-miR-1649-5p	gga-miR-1733	gga-miR-1845	gga-miR-30c-5p	gga-miR-6556-3p	gga-miR-6633-5p	gga-miR-7447-3p		gga-miR-103-2-5p	gga-miR-1561	gga-miR-1649-5p	gga-miR-1733	gga-miR-1845	gga-miR-30c-5p	gga-miR-6556-3p	gga-miR-6633-5p	gga-miR-7447-3p		gga-miR-103-2-5p	gga-miR-1561	gga-miR-1649-5p	gga-miR-1733	gga-miR-1845	gga-miR-30c-5p	gga-miR-6556-3p	gga-miR-6633-5p	gga-miR-7447-3p		R029
R030		gga-miR-103-3p	gga-miR-1562-3p	gga-miR-1650	gga-miR-1734	gga-miR-184-5p	gga-miR-30d	gga-miR-6556-5p	gga-miR-6634-5p	gga-miR-7447-5p		gga-miR-103-3p	gga-miR-1562-3p	gga-miR-1650	gga-miR-1734	gga-miR-184-5p	gga-miR-30d	gga-miR-6556-5p	gga-miR-6634-5p	gga-miR-7447-5p		gga-miR-103-3p	gga-miR-1562-3p	gga-miR-1650	gga-miR-1734	gga-miR-184-5p	gga-miR-30d	gga-miR-6556-5p	gga-miR-6634-5p	gga-miR-7447-5p		R030
R031		gga-miR-106-3p	gga-miR-1562-5p	gga-miR-1651-3p	gga-miR-1735	gga-miR-187-3p	gga-miR-30e-3p	gga-miR-6557-3p	gga-miR-6635-5p	gga-miR-7448-3p		gga-miR-106-3p	gga-miR-1562-5p	gga-miR-1651-3p	gga-miR-1735	gga-miR-187-3p	gga-miR-30e-3p	gga-miR-6557-3p	gga-miR-6635-5p	gga-miR-7448-3p		gga-miR-106-3p	gga-miR-1562-5p	gga-miR-1651-3p	gga-miR-1735	gga-miR-187-3p	gga-miR-30e-3p	gga-miR-6557-3p	gga-miR-6635-5p	gga-miR-7448-3p		R031
R032		gga-miR-106-5p	gga-miR-1563	gga-miR-1651-5p	gga-miR-1736-3p	gga-miR-187-5p	gga-miR-30e-5p	gga-miR-6557-5p	gga-miR-6637-3p	gga-miR-7448-5p		gga-miR-106-5p	gga-miR-1563	gga-miR-1651-5p	gga-miR-1736-3p	gga-miR-187-5p	gga-miR-30e-5p	gga-miR-6557-5p	gga-miR-6637-3p	gga-miR-7448-5p		gga-miR-106-5p	gga-miR-1563	gga-miR-1651-5p	gga-miR-1736-3p	gga-miR-187-5p	gga-miR-30e-5p	gga-miR-6557-5p	gga-miR-6637-3p	gga-miR-7448-5p		R032
R033		gga-miR-107-3p	gga-miR-1564-3p	gga-miR-1652	gga-miR-1736-5p	gga-miR-18a-3p	gga-miR-31-3p	gga-miR-6558-3p	gga-miR-6639-5p	gga-miR-7449-3p		gga-miR-107-3p	gga-miR-1564-3p	gga-miR-1652	gga-miR-1736-5p	gga-miR-18a-3p	gga-miR-31-3p	gga-miR-6558-3p	gga-miR-6639-5p	gga-miR-7449-3p		gga-miR-107-3p	gga-miR-1564-3p	gga-miR-1652	gga-miR-1736-5p	gga-miR-18a-3p	gga-miR-31-3p	gga-miR-6558-3p	gga-miR-6639-5p	gga-miR-7449-3p		R033
R034		gga-miR-107-5p	gga-miR-1564-5p	gga-miR-1653	gga-miR-1737	gga-miR-18a-5p	gga-miR-31-5p	gga-miR-6558-5p	gga-miR-6640-5p	gga-miR-7449-5p		gga-miR-107-5p	gga-miR-1564-5p	gga-miR-1653	gga-miR-1737	gga-miR-18a-5p	gga-miR-31-5p	gga-miR-6558-5p	gga-miR-6640-5p	gga-miR-7449-5p		gga-miR-107-5p	gga-miR-1564-5p	gga-miR-1653	gga-miR-1737	gga-miR-18a-5p	gga-miR-31-5p	gga-miR-6558-5p	gga-miR-6640-5p	gga-miR-7449-5p		R034
R035		gga-miR-10a-3p	gga-miR-1565	gga-miR-1654	gga-miR-1738	gga-miR-18b-3p	gga-miR-32-3p	gga-miR-6559-3p	gga-miR-6641-3p	gga-miR-7450-3p		gga-miR-10a-3p	gga-miR-1565	gga-miR-1654	gga-miR-1738	gga-miR-18b-3p	gga-miR-32-3p	gga-miR-6559-3p	gga-miR-6641-3p	gga-miR-7450-3p		gga-miR-10a-3p	gga-miR-1565	gga-miR-1654	gga-miR-1738	gga-miR-18b-3p	gga-miR-32-3p	gga-miR-6559-3p	gga-miR-6641-3p	gga-miR-7450-3p		R035
R036	BKG0	gga-miR-10a-5p	gga-miR-1567	gga-miR-1655-3p	gga-miR-1739	gga-miR-18b-5p	gga-miR-32-5p	gga-miR-6559-5p	gga-miR-6641-5p	gga-miR-7450-5p	BKG0	gga-miR-10a-5p	gga-miR-1567	gga-miR-1655-3p	gga-miR-1739	gga-miR-18b-5p	gga-miR-32-5p	gga-miR-6559-5p	gga-miR-6641-5p	gga-miR-7450-5p	BKG0	gga-miR-10a-5p	gga-miR-1567	gga-miR-1655-3p	gga-miR-1739	gga-miR-18b-5p	gga-miR-32-5p	gga-miR-6559-5p	gga-miR-6641-5p	gga-miR-7450-5p	BKG0	R036
R037	PUC2PM	gga-miR-10b-3p	gga-miR-1568	gga-miR-1655-5p	gga-miR-17-3p	gga-miR-190a-3p	gga-miR-33-3p	gga-miR-6560-3p	gga-miR-6642-3p	gga-miR-7451-3p	PUC2PM	gga-miR-10b-3p	gga-miR-1568	gga-miR-1655-5p	gga-miR-17-3p	gga-miR-190a-3p	gga-miR-33-3p	gga-miR-6560-3p	gga-miR-6642-3p	gga-miR-7451-3p	PUC2PM	gga-miR-10b-3p	gga-miR-1568	gga-miR-1655-5p	gga-miR-17-3p	gga-miR-190a-3p	gga-miR-33-3p	gga-miR-6560-3p	gga-miR-6642-3p	gga-miR-7451-3p	PUC2PM	R037
R038	PUC2MM	gga-miR-10b-5p	gga-miR-1569	gga-miR-1656	gga-miR-1740-3p	gga-miR-190a-5p	gga-miR-33-5p	gga-miR-6560-5p	gga-miR-6642-5p	gga-miR-7451-5p	PUC2MM	gga-miR-10b-5p	gga-miR-1569	gga-miR-1656	gga-miR-1740-3p	gga-miR-190a-5p	gga-miR-33-5p	gga-miR-6560-5p	gga-miR-6642-5p	gga-miR-7451-5p	PUC2MM	gga-miR-10b-5p	gga-miR-1569	gga-miR-1656	gga-miR-1740-3p	gga-miR-190a-5p	gga-miR-33-5p	gga-miR-6560-5p	gga-miR-6642-5p	gga-miR-7451-5p	PUC2MM	R038
R039	PUC2PM-20B	gga-miR-122-3p	gga-miR-1570	gga-miR-1657	gga-miR-1740-5p	gga-miR-193a-3p	gga-miR-34a-3p	gga-miR-6561-3p	gga-miR-6643-5p	gga-miR-7452-3p	PUC2PM-20B	gga-miR-122-3p	gga-miR-1570	gga-miR-1657	gga-miR-1740-5p	gga-miR-193a-3p	gga-miR-34a-3p	gga-miR-6561-3p	gga-miR-6643-5p	gga-miR-7452-3p	PUC2PM-20B	gga-miR-122-3p	gga-miR-1570	gga-miR-1657	gga-miR-1740-5p	gga-miR-193a-3p	gga-miR-34a-3p	gga-miR-6561-3p	gga-miR-6643-5p	gga-miR-7452-3p	PUC2PM-20B	R039
R040	PUC2MM-20B	gga-miR-122-5p	gga-miR-1571	gga-miR-1658-3p	gga-miR-1741	gga-miR-193a-5p	gga-miR-34a-5p	gga-miR-6561-5p	gga-miR-6644-3p	gga-miR-7452-5p	PUC2MM-20B	gga-miR-122-5p	gga-miR-1571	gga-miR-1658-3p	gga-miR-1741	gga-miR-193a-5p	gga-miR-34a-5p	gga-miR-6561-5p	gga-miR-6644-3p	gga-miR-7452-5p	PUC2MM-20B	gga-miR-122-5p	gga-miR-1571	gga-miR-1658-3p	gga-miR-1741	gga-miR-193a-5p	gga-miR-34a-5p	gga-miR-6561-5p	gga-miR-6644-3p	gga-miR-7452-5p	PUC2MM-20B	R040
R041	a2-PUC2PM-20B	gga-miR-122b	gga-miR-1572	gga-miR-1658-5p	gga-miR-1742	gga-miR-193b-3p	gga-miR-34b-3p	gga-miR-6562-3p	gga-miR-6645-5p	gga-miR-7453-3p	a2-PUC2PM-20B	gga-miR-122b	gga-miR-1572	gga-miR-1658-5p	gga-miR-1742	gga-miR-193b-3p	gga-miR-34b-3p	gga-miR-6562-3p	gga-miR-6645-5p	gga-miR-7453-3p	a2-PUC2PM-20B	gga-miR-122b	gga-miR-1572	gga-miR-1658-5p	gga-miR-1742	gga-miR-193b-3p	gga-miR-34b-3p	gga-miR-6562-3p	gga-miR-6645-5p	gga-miR-7453-3p	a2-PUC2PM-20B	R041
R042	a2-PUC2MM-20B	gga-miR-124a-3p	gga-miR-1573	gga-miR-1659	gga-miR-1743	gga-miR-193b-5p	gga-miR-34b-5p	gga-miR-6562-5p	gga-miR-6646-3p	gga-miR-7453-5p	a2-PUC2MM-20B	gga-miR-124a-3p	gga-miR-1573	gga-miR-1659	gga-miR-1743	gga-miR-193b-5p	gga-miR-34b-5p	gga-miR-6562-5p	gga-miR-6646-3p	gga-miR-7453-5p	a2-PUC2MM-20B	gga-miR-124a-3p	gga-miR-1573	gga-miR-1659	gga-miR-1743	gga-miR-193b-5p	gga-miR-34b-5p	gga-miR-6562-5p	gga-miR-6646-3p	gga-miR-7453-5p	a2-PUC2MM-20B	R042
R043	a3-PUC2PM-20B	gga-miR-124a-5p	gga-miR-1574-3p	gga-miR-16-5p	gga-miR-1744-3p	gga-miR-194	gga-miR-34c-3p	gga-miR-6563-3p	gga-miR-6647-5p	gga-miR-7454-3p	a3-PUC2PM-20B	gga-miR-124a-5p	gga-miR-1574-3p	gga-miR-16-5p	gga-miR-1744-3p	gga-miR-194	gga-miR-34c-3p	gga-miR-6563-3p	gga-miR-6647-5p	gga-miR-7454-3p	a3-PUC2PM-20B	gga-miR-124a-5p	gga-miR-1574-3p	gga-miR-16-5p	gga-miR-1744-3p	gga-miR-194	gga-miR-34c-3p	gga-miR-6563-3p	gga-miR-6647-5p	gga-miR-7454-3p	a3-PUC2PM-20B	R043
R044	a3-PUC2MM-20B	gga-miR-124b	gga-miR-1574-5p	gga-miR-1660	gga-miR-1744-5p	gga-miR-196-1-3p	gga-miR-34c-5p	gga-miR-6563-5p	gga-miR-6648-3p	gga-miR-7454-5p	a3-PUC2MM-20B	gga-miR-124b	gga-miR-1574-5p	gga-miR-1660	gga-miR-1744-5p	gga-miR-196-1-3p	gga-miR-34c-5p	gga-miR-6563-5p	gga-miR-6648-3p	gga-miR-7454-5p	a3-PUC2MM-20B	gga-miR-124b	gga-miR-1574-5p	gga-miR-1660	gga-miR-1744-5p	gga-miR-196-1-3p	gga-miR-34c-5p	gga-miR-6563-5p	gga-miR-6648-3p	gga-miR-7454-5p	a3-PUC2MM-20B	R044
R045	a-PUC2PM	gga-miR-124c-3p	gga-miR-1575	gga-miR-1661	gga-miR-1745	gga-miR-196-2-3p	gga-miR-3523	gga-miR-6564-3p	gga-miR-6648-5p	gga-miR-7455-3p	a-PUC2PM	gga-miR-124c-3p	gga-miR-1575	gga-miR-1661	gga-miR-1745	gga-miR-196-2-3p	gga-miR-3523	gga-miR-6564-3p	gga-miR-6648-5p	gga-miR-7455-3p	a-PUC2PM	gga-miR-124c-3p	gga-miR-1575	gga-miR-1661	gga-miR-1745	gga-miR-196-2-3p	gga-miR-3523	gga-miR-6564-3p	gga-miR-6648-5p	gga-miR-7455-3p	a-PUC2PM	R045
R046	a-PUC2MM2d	gga-miR-124c-5p	gga-miR-1576	gga-miR-1662	gga-miR-1746	gga-miR-196-5p	gga-miR-3524a	gga-miR-6564-5p	gga-miR-6649-3p	gga-miR-7455-5p	a-PUC2MM2d	gga-miR-124c-5p	gga-miR-1576	gga-miR-1662	gga-miR-1746	gga-miR-196-5p	gga-miR-3524a	gga-miR-6564-5p	gga-miR-6649-3p	gga-miR-7455-5p	a-PUC2MM2d	gga-miR-124c-5p	gga-miR-1576	gga-miR-1662	gga-miR-1746	gga-miR-196-5p	gga-miR-3524a	gga-miR-6564-5p	gga-miR-6649-3p	gga-miR-7455-5p	a-PUC2MM2d	R046
R047	Ctr01-3P	gga-miR-125b-3p	gga-miR-1577	gga-miR-1663-3p	gga-miR-1747-3p	gga-miR-199-3p	gga-miR-3524b-3p	gga-miR-6565-3p	gga-miR-6649-5p	gga-miR-7456-3p	Ctr01-3P	gga-miR-125b-3p	gga-miR-1577	gga-miR-1663-3p	gga-miR-1747-3p	gga-miR-199-3p	gga-miR-3524b-3p	gga-miR-6565-3p	gga-miR-6649-5p	gga-miR-7456-3p	Ctr01-3P	gga-miR-125b-3p	gga-miR-1577	gga-miR-1663-3p	gga-miR-1747-3p	gga-miR-199-3p	gga-miR-3524b-3p	gga-miR-6565-3p	gga-miR-6649-5p	gga-miR-7456-3p	Ctr01-3P	R047
R048	Ctr01-3M05	gga-miR-125b-5p	gga-miR-1578	gga-miR-1663-5p	gga-miR-1747-5p	gga-miR-199-5p	gga-miR-3525	gga-miR-6565-5p	gga-miR-6650-5p	gga-miR-7456-5p	Ctr01-3M05	gga-miR-125b-5p	gga-miR-1578	gga-miR-1663-5p	gga-miR-1747-5p	gga-miR-199-5p	gga-miR-3525	gga-miR-6565-5p	gga-miR-6650-5p	gga-miR-7456-5p	Ctr01-3M05	gga-miR-125b-5p	gga-miR-1578	gga-miR-1663-5p	gga-miR-1747-5p	gga-miR-199-5p	gga-miR-3525	gga-miR-6565-5p	gga-miR-6650-5p	gga-miR-7456-5p	Ctr01-3M05	R048
R049	Ctr01-3M10	gga-miR-126-3p	gga-miR-1579	gga-miR-1664-3p	gga-miR-1748	gga-miR-199b	gga-miR-3526	gga-miR-6566-3p	gga-miR-6651-5p	gga-miR-7457-3p	Ctr01-3M10	gga-miR-126-3p	gga-miR-1579	gga-miR-1664-3p	gga-miR-1748	gga-miR-199b	gga-miR-3526	gga-miR-6566-3p	gga-miR-6651-5p	gga-miR-7457-3p	Ctr01-3M10	gga-miR-126-3p	gga-miR-1579	gga-miR-1664-3p	gga-miR-1748	gga-miR-199b	gga-miR-3526	gga-miR-6566-3p	gga-miR-6651-5p	gga-miR-7457-3p	Ctr01-3M10	R049
R050	Ctr02-3P	gga-miR-126-5p	gga-miR-1580	gga-miR-1664-5p	gga-miR-1749-3p	gga-miR-19a-3p	gga-miR-3528	gga-miR-6566-5p	gga-miR-6652-5p	gga-miR-7457-5p	Ctr02-3P	gga-miR-126-5p	gga-miR-1580	gga-miR-1664-5p	gga-miR-1749-3p	gga-miR-19a-3p	gga-miR-3528	gga-miR-6566-5p	gga-miR-6652-5p	gga-miR-7457-5p	Ctr02-3P	gga-miR-126-5p	gga-miR-1580	gga-miR-1664-5p	gga-miR-1749-3p	gga-miR-19a-3p	gga-miR-3528	gga-miR-6566-5p	gga-miR-6652-5p	gga-miR-7457-5p	Ctr02-3P	R050
R051	Ctr02-3M05	gga-miR-128-1-5p	gga-miR-1581	gga-miR-1665	gga-miR-1749-5p	gga-miR-19a-5p	gga-miR-3529	gga-miR-6567-3p	gga-miR-6653-3p	gga-miR-7458-3p	Ctr02-3M05	gga-miR-128-1-5p	gga-miR-1581	gga-miR-1665	gga-miR-1749-5p	gga-miR-19a-5p	gga-miR-3529	gga-miR-6567-3p	gga-miR-6653-3p	gga-miR-7458-3p	Ctr02-3M05	gga-miR-128-1-5p	gga-miR-1581	gga-miR-1665	gga-miR-1749-5p	gga-miR-19a-5p	gga-miR-3529	gga-miR-6567-3p	gga-miR-6653-3p	gga-miR-7458-3p	Ctr02-3M05	R051
R052	Ctr02-3M10	gga-miR-128-2-5p	gga-miR-1582	gga-miR-1666	gga-miR-1750	gga-miR-19b-3p	gga-miR-3530-3p	gga-miR-6567-5p	gga-miR-6654-3p	gga-miR-7458-5p	Ctr02-3M10	gga-miR-128-2-5p	gga-miR-1582	gga-miR-1666	gga-miR-1750	gga-miR-19b-3p	gga-miR-3530-3p	gga-miR-6567-5p	gga-miR-6654-3p	gga-miR-7458-5p	Ctr02-3M10	gga-miR-128-2-5p	gga-miR-1582	gga-miR-1666	gga-miR-1750	gga-miR-19b-3p	gga-miR-3530-3p	gga-miR-6567-5p	gga-miR-6654-3p	gga-miR-7458-5p	Ctr02-3M10	R052
R053	Ctr03-3P	gga-miR-128-3p	gga-miR-1583	gga-miR-1667-3p	gga-miR-1751-5p	gga-miR-19b-5p	gga-miR-3530-5p	gga-miR-6568-3p	gga-miR-6655-5p	gga-miR-7459-3p	Ctr03-3P	gga-miR-128-3p	gga-miR-1583	gga-miR-1667-3p	gga-miR-1751-5p	gga-miR-19b-5p	gga-miR-3530-5p	gga-miR-6568-3p	gga-miR-6655-5p	gga-miR-7459-3p	Ctr03-3P	gga-miR-128-3p	gga-miR-1583	gga-miR-1667-3p	gga-miR-1751-5p	gga-miR-19b-5p	gga-miR-3530-5p	gga-miR-6568-3p	gga-miR-6655-5p	gga-miR-7459-3p	Ctr03-3P	R053
R054	Ctr03-3M05	gga-miR-1306-3p	gga-miR-1584	gga-miR-1667-5p	gga-miR-1752	gga-miR-1a-1-5p	gga-miR-3531-3p	gga-miR-6568-5p	gga-miR-6656-5p	gga-miR-7459-5p	Ctr03-3M05	gga-miR-1306-3p	gga-miR-1584	gga-miR-1667-5p	gga-miR-1752	gga-miR-1a-1-5p	gga-miR-3531-3p	gga-miR-6568-5p	gga-miR-6656-5p	gga-miR-7459-5p	Ctr03-3M05	gga-miR-1306-3p	gga-miR-1584	gga-miR-1667-5p	gga-miR-1752	gga-miR-1a-1-5p	gga-miR-3531-3p	gga-miR-6568-5p	gga-miR-6656-5p	gga-miR-7459-5p	Ctr03-3M05	R054
R055	Ctr03-3M10	gga-miR-1306-5p	gga-miR-1585	gga-miR-1668-3p	gga-miR-1753	gga-miR-1a-2-5p	gga-miR-3531-5p	gga-miR-6569-3p	gga-miR-6657-3p	gga-miR-7460-3p	Ctr03-3M10	gga-miR-1306-5p	gga-miR-1585	gga-miR-1668-3p	gga-miR-1753	gga-miR-1a-2-5p	gga-miR-3531-5p	gga-miR-6569-3p	gga-miR-6657-3p	gga-miR-7460-3p	Ctr03-3M10	gga-miR-1306-5p	gga-miR-1585	gga-miR-1668-3p	gga-miR-1753	gga-miR-1a-2-5p	gga-miR-3531-5p	gga-miR-6569-3p	gga-miR-6657-3p	gga-miR-7460-3p	Ctr03-3M10	R055
R056	Ctr04-3P	gga-miR-130a-3p	gga-miR-1586	gga-miR-1668-5p	gga-miR-1754-3p	gga-miR-1a-3p	gga-miR-3532-3p	gga-miR-6569-5p	gga-miR-6658-3p	gga-miR-7460-5p	Ctr04-3P	gga-miR-130a-3p	gga-miR-1586	gga-miR-1668-5p	gga-miR-1754-3p	gga-miR-1a-3p	gga-miR-3532-3p	gga-miR-6569-5p	gga-miR-6658-3p	gga-miR-7460-5p	Ctr04-3P	gga-miR-130a-3p	gga-miR-1586	gga-miR-1668-5p	gga-miR-1754-3p	gga-miR-1a-3p	gga-miR-3532-3p	gga-miR-6569-5p	gga-miR-6658-3p	gga-miR-7460-5p	Ctr04-3P	R056
R057	Ctr04-3M05	gga-miR-130a-5p	gga-miR-1587	gga-miR-1669	gga-miR-1754-5p	gga-miR-1b-3p	gga-miR-3532-5p	gga-miR-6570-3p	gga-miR-6659-3p	gga-miR-7461-3p	Ctr04-3M05	gga-miR-130a-5p	gga-miR-1587	gga-miR-1669	gga-miR-1754-5p	gga-miR-1b-3p	gga-miR-3532-5p	gga-miR-6570-3p	gga-miR-6659-3p	gga-miR-7461-3p	Ctr04-3M05	gga-miR-130a-5p	gga-miR-1587	gga-miR-1669	gga-miR-1754-5p	gga-miR-1b-3p	gga-miR-3532-5p	gga-miR-6570-3p	gga-miR-6659-3p	gga-miR-7461-3p	Ctr04-3M05	R057
R058	Ctr04-3M10	gga-miR-130b-3p	gga-miR-1588	gga-miR-1670	gga-miR-1755	gga-miR-1b-5p	gga-miR-3533	gga-miR-6570-5p	gga-miR-6660-3p	gga-miR-7461-5p	Ctr04-3M10	gga-miR-130b-3p	gga-miR-1588	gga-miR-1670	gga-miR-1755	gga-miR-1b-5p	gga-miR-3533	gga-miR-6570-5p	gga-miR-6660-3p	gga-miR-7461-5p	Ctr04-3M10	gga-miR-130b-3p	gga-miR-1588	gga-miR-1670	gga-miR-1755	gga-miR-1b-5p	gga-miR-3533	gga-miR-6570-5p	gga-miR-6660-3p	gga-miR-7461-5p	Ctr04-3M10	R058
R059	Ctr05-3P	gga-miR-130b-5p	gga-miR-1589	gga-miR-1671	gga-miR-1756a	gga-miR-1c	gga-miR-3534	gga-miR-6571-3p	gga-miR-6661-5p	gga-miR-7462-3p	Ctr05-3P	gga-miR-130b-5p	gga-miR-1589	gga-miR-1671	gga-miR-1756a	gga-miR-1c	gga-miR-3534	gga-miR-6571-3p	gga-miR-6661-5p	gga-miR-7462-3p	Ctr05-3P	gga-miR-130b-5p	gga-miR-1589	gga-miR-1671	gga-miR-1756a	gga-miR-1c	gga-miR-3534	gga-miR-6571-3p	gga-miR-6661-5p	gga-miR-7462-3p	Ctr05-3P	R059
R060	Ctr05-3M05	gga-miR-130c-3p	gga-miR-1590	gga-miR-1672	gga-miR-1756b	gga-miR-200a-3p	gga-miR-3535	gga-miR-6571-5p	gga-miR-6662-3p	gga-miR-7462-5p	Ctr05-3M05	gga-miR-130c-3p	gga-miR-1590	gga-miR-1672	gga-miR-1756b	gga-miR-200a-3p	gga-miR-3535	gga-miR-6571-5p	gga-miR-6662-3p	gga-miR-7462-5p	Ctr05-3M05	gga-miR-130c-3p	gga-miR-1590	gga-miR-1672	gga-miR-1756b	gga-miR-200a-3p	gga-miR-3535	gga-miR-6571-5p	gga-miR-6662-3p	gga-miR-7462-5p	Ctr05-3M05	R060
R061	Ctr05-3M10	gga-miR-130c-5p	gga-miR-1591-3p	gga-miR-1673	gga-miR-1757	gga-miR-200a-5p	gga-miR-3536	gga-miR-6572-3p	gga-miR-6663-5p	gga-miR-7463-3p	Ctr05-3M10	gga-miR-130c-5p	gga-miR-1591-3p	gga-miR-1673	gga-miR-1757	gga-miR-200a-5p	gga-miR-3536	gga-miR-6572-3p	gga-miR-6663-5p	gga-miR-7463-3p	Ctr05-3M10	gga-miR-130c-5p	gga-miR-1591-3p	gga-miR-1673	gga-miR-1757	gga-miR-200a-5p	gga-miR-3536	gga-miR-6572-3p	gga-miR-6663-5p	gga-miR-7463-3p	Ctr05-3M10	R061
R062	Ctr06-3P	gga-miR-1329-3p	gga-miR-1591-5p	gga-miR-1674	gga-miR-1758	gga-miR-200b-3p	gga-miR-3537	gga-miR-6572-5p	gga-miR-6664-3p	gga-miR-7463-5p	Ctr06-3P	gga-miR-1329-3p	gga-miR-1591-5p	gga-miR-1674	gga-miR-1758	gga-miR-200b-3p	gga-miR-3537	gga-miR-6572-5p	gga-miR-6664-3p	gga-miR-7463-5p	Ctr06-3P	gga-miR-1329-3p	gga-miR-1591-5p	gga-miR-1674	gga-miR-1758	gga-miR-200b-3p	gga-miR-3537	gga-miR-6572-5p	gga-miR-6664-3p	gga-miR-7463-5p	Ctr06-3P	R062
R063	Ctr06-3M05	gga-miR-1329-5p	gga-miR-1592	gga-miR-1675	gga-miR-1759-3p	gga-miR-200b-5p	gga-miR-3538	gga-miR-6573-3p	gga-miR-6665-5p	gga-miR-7464-3p	Ctr06-3M05	gga-miR-1329-5p	gga-miR-1592	gga-miR-1675	gga-miR-1759-3p	gga-miR-200b-5p	gga-miR-3538	gga-miR-6573-3p	gga-miR-6665-5p	gga-miR-7464-3p	Ctr06-3M05	gga-miR-1329-5p	gga-miR-1592	gga-miR-1675	gga-miR-1759-3p	gga-miR-200b-5p	gga-miR-3538	gga-miR-6573-3p	gga-miR-6665-5p	gga-miR-7464-3p	Ctr06-3M05	R063
R064	Ctr06-3M10	gga-miR-133a-3p	gga-miR-1593	gga-miR-1676-3p	gga-miR-1759-5p	gga-miR-202-3p	gga-miR-3539	gga-miR-6573-5p	gga-miR-6666-3p	gga-miR-7464-5p	Ctr06-3M10	gga-miR-133a-3p	gga-miR-1593	gga-miR-1676-3p	gga-miR-1759-5p	gga-miR-202-3p	gga-miR-3539	gga-miR-6573-5p	gga-miR-6666-3p	gga-miR-7464-5p	Ctr06-3M10	gga-miR-133a-3p	gga-miR-1593	gga-miR-1676-3p	gga-miR-1759-5p	gga-miR-202-3p	gga-miR-3539	gga-miR-6573-5p	gga-miR-6666-3p	gga-miR-7464-5p	Ctr06-3M10	R064
R065	Ctr07-3P	gga-miR-133a-5p	gga-miR-1594	gga-miR-1676-5p	gga-miR-17-5p	gga-miR-202-5p	gga-miR-3540	gga-miR-6574-3p	gga-miR-6667-5p	gga-miR-7465-3p	Ctr07-3P	gga-miR-133a-5p	gga-miR-1594	gga-miR-1676-5p	gga-miR-17-5p	gga-miR-202-5p	gga-miR-3540	gga-miR-6574-3p	gga-miR-6667-5p	gga-miR-7465-3p	Ctr07-3P	gga-miR-133a-5p	gga-miR-1594	gga-miR-1676-5p	gga-miR-17-5p	gga-miR-202-5p	gga-miR-3540	gga-miR-6574-3p	gga-miR-6667-5p	gga-miR-7465-3p	Ctr07-3P	R065
R066	Ctr07-3M05	gga-miR-133b	gga-miR-1595-3p	gga-miR-1677-3p	gga-miR-1760	gga-miR-203a	gga-miR-3594-3p	gga-miR-6574-5p	gga-miR-6668-3p	gga-miR-7465-5p	Ctr07-3M05	gga-miR-133b	gga-miR-1595-3p	gga-miR-1677-3p	gga-miR-1760	gga-miR-203a	gga-miR-3594-3p	gga-miR-6574-5p	gga-miR-6668-3p	gga-miR-7465-5p	Ctr07-3M05	gga-miR-133b	gga-miR-1595-3p	gga-miR-1677-3p	gga-miR-1760	gga-miR-203a	gga-miR-3594-3p	gga-miR-6574-5p	gga-miR-6668-3p	gga-miR-7465-5p	Ctr07-3M05	R066
R067	Ctr07-3M10	gga-miR-133c-3p	gga-miR-1595-5p	gga-miR-1677-5p	gga-miR-1761	gga-miR-204	gga-miR-3594-5p	gga-miR-6575-3p	gga-miR-6669-3p	gga-miR-7466-3p	Ctr07-3M10	gga-miR-133c-3p	gga-miR-1595-5p	gga-miR-1677-5p	gga-miR-1761	gga-miR-204	gga-miR-3594-5p	gga-miR-6575-3p	gga-miR-6669-3p	gga-miR-7466-3p	Ctr07-3M10	gga-miR-133c-3p	gga-miR-1595-5p	gga-miR-1677-5p	gga-miR-1761	gga-miR-204	gga-miR-3594-5p	gga-miR-6575-3p	gga-miR-6669-3p	gga-miR-7466-3p	Ctr07-3M10	R067
R068	Ctr08-3P	gga-miR-133c-5p	gga-miR-1596-3p	gga-miR-1678	gga-miR-1762	gga-miR-205a	gga-miR-3607-3p	gga-miR-6575-5p	gga-miR-6669-5p	gga-miR-7466-5p	Ctr08-3P	gga-miR-133c-5p	gga-miR-1596-3p	gga-miR-1678	gga-miR-1762	gga-miR-205a	gga-miR-3607-3p	gga-miR-6575-5p	gga-miR-6669-5p	gga-miR-7466-5p	Ctr08-3P	gga-miR-133c-5p	gga-miR-1596-3p	gga-miR-1678	gga-miR-1762	gga-miR-205a	gga-miR-3607-3p	gga-miR-6575-5p	gga-miR-6669-5p	gga-miR-7466-5p	Ctr08-3P	R068
R069	Ctr08-3M05	gga-miR-1354	gga-miR-1596-5p	gga-miR-1679	gga-miR-1763	gga-miR-205b	gga-miR-3607-5p	gga-miR-6576-3p	gga-miR-6670-5p	gga-miR-7467-3p	Ctr08-3M05	gga-miR-1354	gga-miR-1596-5p	gga-miR-1679	gga-miR-1763	gga-miR-205b	gga-miR-3607-5p	gga-miR-6576-3p	gga-miR-6670-5p	gga-miR-7467-3p	Ctr08-3M05	gga-miR-1354	gga-miR-1596-5p	gga-miR-1679	gga-miR-1763	gga-miR-205b	gga-miR-3607-5p	gga-miR-6576-3p	gga-miR-6670-5p	gga-miR-7467-3p	Ctr08-3M05	R069
R070	Ctr08-3M10	gga-miR-135a-1-3p	gga-miR-1597-3p	gga-miR-1680-3p	gga-miR-1764-3p	gga-miR-206	gga-miR-365-1-5p	gga-miR-6576-5p	gga-miR-6671-5p	gga-miR-7467-5p	Ctr08-3M10	gga-miR-135a-1-3p	gga-miR-1597-3p	gga-miR-1680-3p	gga-miR-1764-3p	gga-miR-206	gga-miR-365-1-5p	gga-miR-6576-5p	gga-miR-6671-5p	gga-miR-7467-5p	Ctr08-3M10	gga-miR-135a-1-3p	gga-miR-1597-3p	gga-miR-1680-3p	gga-miR-1764-3p	gga-miR-206	gga-miR-365-1-5p	gga-miR-6576-5p	gga-miR-6671-5p	gga-miR-7467-5p	Ctr08-3M10	R070
R071	Ctr09-3P	gga-miR-135a-2-3p	gga-miR-1597-5p	gga-miR-1680-5p	gga-miR-1764-5p	gga-miR-20a-3p	gga-miR-365-2-5p	gga-miR-6577-3p	gga-miR-6672-3p	gga-miR-7468-3p	Ctr09-3P	gga-miR-135a-2-3p	gga-miR-1597-5p	gga-miR-1680-5p	gga-miR-1764-5p	gga-miR-20a-3p	gga-miR-365-2-5p	gga-miR-6577-3p	gga-miR-6672-3p	gga-miR-7468-3p	Ctr09-3P	gga-miR-135a-2-3p	gga-miR-1597-5p	gga-miR-1680-5p	gga-miR-1764-5p	gga-miR-20a-3p	gga-miR-365-2-5p	gga-miR-6577-3p	gga-miR-6672-3p	gga-miR-7468-3p	Ctr09-3P	R071
R072	Ctr09-3M05	gga-miR-135a-3-3p	gga-miR-1598	gga-miR-1681	gga-miR-1765	gga-miR-20a-5p	gga-miR-365-3p	gga-miR-6577-5p	gga-miR-6673-3p	gga-miR-7468-5p	Ctr09-3M05	gga-miR-135a-3-3p	gga-miR-1598	gga-miR-1681	gga-miR-1765	gga-miR-20a-5p	gga-miR-365-3p	gga-miR-6577-5p	gga-miR-6673-3p	gga-miR-7468-5p	Ctr09-3M05	gga-miR-135a-3-3p	gga-miR-1598	gga-miR-1681	gga-miR-1765	gga-miR-20a-5p	gga-miR-365-3p	gga-miR-6577-5p	gga-miR-6673-3p	gga-miR-7468-5p	Ctr09-3M05	R072
R073	Ctr09-3M10	gga-miR-135a-5p	gga-miR-1599	gga-miR-1682	gga-miR-1766	gga-miR-20b-3p	gga-miR-365b-5p	gga-miR-6578-3p	gga-miR-6674-3p	gga-miR-7469-3p	Ctr09-3M10	gga-miR-135a-5p	gga-miR-1599	gga-miR-1682	gga-miR-1766	gga-miR-20b-3p	gga-miR-365b-5p	gga-miR-6578-3p	gga-miR-6674-3p	gga-miR-7469-3p	Ctr09-3M10	gga-miR-135a-5p	gga-miR-1599	gga-miR-1682	gga-miR-1766	gga-miR-20b-3p	gga-miR-365b-5p	gga-miR-6578-3p	gga-miR-6674-3p	gga-miR-7469-3p	Ctr09-3M10	R073
R074	Ctr10-3P	gga-miR-135b	gga-miR-15a	gga-miR-1683	gga-miR-1767	gga-miR-20b-5p	gga-miR-367	gga-miR-6578-5p	gga-miR-6675-3p	gga-miR-7469-5p	Ctr10-3P	gga-miR-135b	gga-miR-15a	gga-miR-1683	gga-miR-1767	gga-miR-20b-5p	gga-miR-367	gga-miR-6578-5p	gga-miR-6675-3p	gga-miR-7469-5p	Ctr10-3P	gga-miR-135b	gga-miR-15a	gga-miR-1683	gga-miR-1767	gga-miR-20b-5p	gga-miR-367	gga-miR-6578-5p	gga-miR-6675-3p	gga-miR-7469-5p	Ctr10-3P	R074
R075	Ctr10-3M05	gga-miR-137-3p	gga-miR-15b-3p	gga-miR-1684a-3p	gga-miR-1768	gga-miR-2126	gga-miR-375	gga-miR-6579-3p	gga-miR-6675-5p	gga-miR-7470-3p	Ctr10-3M05	gga-miR-137-3p	gga-miR-15b-3p	gga-miR-1684a-3p	gga-miR-1768	gga-miR-2126	gga-miR-375	gga-miR-6579-3p	gga-miR-6675-5p	gga-miR-7470-3p	Ctr10-3M05	gga-miR-137-3p	gga-miR-15b-3p	gga-miR-1684a-3p	gga-miR-1768	gga-miR-2126	gga-miR-375	gga-miR-6579-3p	gga-miR-6675-5p	gga-miR-7470-3p	Ctr10-3M05	R075
R076	Ctr10-3M10	gga-miR-137-5p	gga-miR-15b-5p	gga-miR-1684a-5p	gga-miR-1769-3p	gga-miR-2127	gga-miR-383-3p	gga-miR-6579-5p	gga-miR-6676-3p	gga-miR-7470-5p	Ctr10-3M10	gga-miR-137-5p	gga-miR-15b-5p	gga-miR-1684a-5p	gga-miR-1769-3p	gga-miR-2127	gga-miR-383-3p	gga-miR-6579-5p	gga-miR-6676-3p	gga-miR-7470-5p	Ctr10-3M10	gga-miR-137-5p	gga-miR-15b-5p	gga-miR-1684a-5p	gga-miR-1769-3p	gga-miR-2127	gga-miR-383-3p	gga-miR-6579-5p	gga-miR-6676-3p	gga-miR-7470-5p	Ctr10-3M10	R076
R077	Ctr11-3P	gga-miR-138-1-3p	gga-miR-15c-3p	gga-miR-1684b-3p	gga-miR-1769-5p	gga-miR-2128	gga-miR-383-5p	gga-miR-6580-3p	gga-miR-6677-3p	gga-miR-7471-3p	Ctr11-3P	gga-miR-138-1-3p	gga-miR-15c-3p	gga-miR-1684b-3p	gga-miR-1769-5p	gga-miR-2128	gga-miR-383-5p	gga-miR-6580-3p	gga-miR-6677-3p	gga-miR-7471-3p	Ctr11-3P	gga-miR-138-1-3p	gga-miR-15c-3p	gga-miR-1684b-3p	gga-miR-1769-5p	gga-miR-2128	gga-miR-383-5p	gga-miR-6580-3p	gga-miR-6677-3p	gga-miR-7471-3p	Ctr11-3P	R077
R078	Ctr11-3M05	gga-miR-138-2-3p	gga-miR-15c-5p	gga-miR-1685-3p	gga-miR-1770	gga-miR-2129	gga-miR-429-3p	gga-miR-6580-5p	gga-miR-6677-5p	gga-miR-7471-5p	Ctr11-3M05	gga-miR-138-2-3p	gga-miR-15c-5p	gga-miR-1685-3p	gga-miR-1770	gga-miR-2129	gga-miR-429-3p	gga-miR-6580-5p	gga-miR-6677-5p	gga-miR-7471-5p	Ctr11-3M05	gga-miR-138-2-3p	gga-miR-15c-5p	gga-miR-1685-3p	gga-miR-1770	gga-miR-2129	gga-miR-429-3p	gga-miR-6580-5p	gga-miR-6677-5p	gga-miR-7471-5p	Ctr11-3M05	R078
R079	Ctr11-3M10	gga-miR-138-5p	gga-miR-1600	gga-miR-1685-5p	gga-miR-1771	gga-miR-2130	gga-miR-429-5p	gga-miR-6581-3p	gga-miR-6678-3p	gga-miR-7472-3p	Ctr11-3M10	gga-miR-138-5p	gga-miR-1600	gga-miR-1685-5p	gga-miR-1771	gga-miR-2130	gga-miR-429-5p	gga-miR-6581-3p	gga-miR-6678-3p	gga-miR-7472-3p	Ctr11-3M10	gga-miR-138-5p	gga-miR-1600	gga-miR-1685-5p	gga-miR-1771	gga-miR-2130	gga-miR-429-5p	gga-miR-6581-3p	gga-miR-6678-3p	gga-miR-7472-3p	Ctr11-3M10	R079
R080	PUC2PM-20B	gga-miR-1397-3p	gga-miR-1601	gga-miR-1686	gga-miR-1772-3p	gga-miR-2131-3p	gga-miR-449a	gga-miR-6581-5p	gga-miR-6679-5p	gga-miR-7472-5p	PUC2PM-20B	gga-miR-1397-3p	gga-miR-1601	gga-miR-1686	gga-miR-1772-3p	gga-miR-2131-3p	gga-miR-449a	gga-miR-6581-5p	gga-miR-6679-5p	gga-miR-7472-5p	PUC2PM-20B	gga-miR-1397-3p	gga-miR-1601	gga-miR-1686	gga-miR-1772-3p	gga-miR-2131-3p	gga-miR-449a	gga-miR-6581-5p	gga-miR-6679-5p	gga-miR-7472-5p	PUC2PM-20B	R080
R081	PUC2MM-20B	gga-miR-1397-5p	gga-miR-1602	gga-miR-1687-3p	gga-miR-1772-5p	gga-miR-2131-5p	gga-miR-449b-3p	gga-miR-6582-3p	gga-miR-6680-3p	gga-miR-7473-3p	PUC2MM-20B	gga-miR-1397-5p	gga-miR-1602	gga-miR-1687-3p	gga-miR-1772-5p	gga-miR-2131-5p	gga-miR-449b-3p	gga-miR-6582-3p	gga-miR-6680-3p	gga-miR-7473-3p	PUC2MM-20B	gga-miR-1397-5p	gga-miR-1602	gga-miR-1687-3p	gga-miR-1772-5p	gga-miR-2131-5p	gga-miR-449b-3p	gga-miR-6582-3p	gga-miR-6680-3p	gga-miR-7473-3p	PUC2MM-20B	R081
R082	BKG0	gga-miR-140-3p	gga-miR-1603	gga-miR-1687-5p	gga-miR-1773-3p	gga-miR-21-3p	gga-miR-449b-5p	gga-miR-6582-5p	gga-miR-6681-5p	gga-miR-7473-5p	BKG0	gga-miR-140-3p	gga-miR-1603	gga-miR-1687-5p	gga-miR-1773-3p	gga-miR-21-3p	gga-miR-449b-5p	gga-miR-6582-5p	gga-miR-6681-5p	gga-miR-7473-5p	BKG0	gga-miR-140-3p	gga-miR-1603	gga-miR-1687-5p	gga-miR-1773-3p	gga-miR-21-3p	gga-miR-449b-5p	gga-miR-6582-5p	gga-miR-6681-5p	gga-miR-7473-5p	BKG0	R082
R083	PUC2PM	gga-miR-140-5p	gga-miR-1604	gga-miR-1688	gga-miR-1773-5p	gga-miR-214	gga-miR-449c-3p	gga-miR-6583-5p	gga-miR-6682-3p	gga-miR-7474-3p	PUC2PM	gga-miR-140-5p	gga-miR-1604	gga-miR-1688	gga-miR-1773-5p	gga-miR-214	gga-miR-449c-3p	gga-miR-6583-5p	gga-miR-6682-3p	gga-miR-7474-3p	PUC2PM	gga-miR-140-5p	gga-miR-1604	gga-miR-1688	gga-miR-1773-5p	gga-miR-214	gga-miR-449c-3p	gga-miR-6583-5p	gga-miR-6682-3p	gga-miR-7474-3p	PUC2PM	R083
R084	PUC2MM	gga-miR-1416-3p	gga-miR-1605	gga-miR-1689-3p	gga-miR-1774	gga-miR-215-3p	gga-miR-449c-5p	gga-miR-6584-5p	gga-miR-6683-3p	gga-miR-7474-5p	PUC2MM	gga-miR-1416-3p	gga-miR-1605	gga-miR-1689-3p	gga-miR-1774	gga-miR-215-3p	gga-miR-449c-5p	gga-miR-6584-5p	gga-miR-6683-3p	gga-miR-7474-5p	PUC2MM	gga-miR-1416-3p	gga-miR-1605	gga-miR-1689-3p	gga-miR-1774	gga-miR-215-3p	gga-miR-449c-5p	gga-miR-6584-5p	gga-miR-6683-3p	gga-miR-7474-5p	PUC2MM	R084
R085	a2-PUC2PM-20B	gga-miR-1416-5p	gga-miR-1606	gga-miR-1689-5p	gga-miR-1775-3p	gga-miR-215-5p	gga-miR-451	gga-miR-6585-5p	gga-miR-6684-5p	gga-miR-7475-3p	a2-PUC2PM-20B	gga-miR-1416-5p	gga-miR-1606	gga-miR-1689-5p	gga-miR-1775-3p	gga-miR-215-5p	gga-miR-451	gga-miR-6585-5p	gga-miR-6684-5p	gga-miR-7475-3p	a2-PUC2PM-20B	gga-miR-1416-5p	gga-miR-1606	gga-miR-1689-5p	gga-miR-1775-3p	gga-miR-215-5p	gga-miR-451	gga-miR-6585-5p	gga-miR-6684-5p	gga-miR-7475-3p	a2-PUC2PM-20B	R085
R086	a2-PUC2MM-20B	gga-miR-142-3p	gga-miR-1607	gga-miR-1690-5p	gga-miR-1775-5p	gga-miR-21-5p	gga-miR-454-3p	gga-miR-6586-5p	gga-miR-6685-3p	gga-miR-7475-5p	a2-PUC2MM-20B	gga-miR-142-3p	gga-miR-1607	gga-miR-1690-5p	gga-miR-1775-5p	gga-miR-21-5p	gga-miR-454-3p	gga-miR-6586-5p	gga-miR-6685-3p	gga-miR-7475-5p	a2-PUC2MM-20B	gga-miR-142-3p	gga-miR-1607	gga-miR-1690-5p	gga-miR-1775-5p	gga-miR-21-5p	gga-miR-454-3p	gga-miR-6586-5p	gga-miR-6685-3p	gga-miR-7475-5p	a2-PUC2MM-20B	R086
R087	a3-PUC2PM-20B	gga-miR-142-5p	gga-miR-1608	gga-miR-1691	gga-miR-1776	gga-miR-216a	gga-miR-454-5p	gga-miR-6587-3p	gga-miR-6685-5p	gga-miR-7476-3p	a3-PUC2PM-20B	gga-miR-142-5p	gga-miR-1608	gga-miR-1691	gga-miR-1776	gga-miR-216a	gga-miR-454-5p	gga-miR-6587-3p	gga-miR-6685-5p	gga-miR-7476-3p	a3-PUC2PM-20B	gga-miR-142-5p	gga-miR-1608	gga-miR-1691	gga-miR-1776	gga-miR-216a	gga-miR-454-5p	gga-miR-6587-3p	gga-miR-6685-5p	gga-miR-7476-3p	a3-PUC2PM-20B	R087
R088	a3-PUC2MM-20B	gga-miR-1434	gga-miR-1609	gga-miR-1692	gga-miR-1777	gga-miR-216b	gga-miR-455-3p	gga-miR-6587-5p	gga-miR-6686-3p	gga-miR-7476-5p	a3-PUC2MM-20B	gga-miR-1434	gga-miR-1609	gga-miR-1692	gga-miR-1777	gga-miR-216b	gga-miR-455-3p	gga-miR-6587-5p	gga-miR-6686-3p	gga-miR-7476-5p	a3-PUC2MM-20B	gga-miR-1434	gga-miR-1609	gga-miR-1692	gga-miR-1777	gga-miR-216b	gga-miR-455-3p	gga-miR-6587-5p	gga-miR-6686-3p	gga-miR-7476-5p	a3-PUC2MM-20B	R088
R089		gga-miR-144-3p	gga-miR-1610	gga-miR-1693	gga-miR-1778	gga-miR-216c	gga-miR-455-5p	gga-miR-6588-3p	gga-miR-6687-3p	gga-miR-7477-3p		gga-miR-144-3p	gga-miR-1610	gga-miR-1693	gga-miR-1778	gga-miR-216c	gga-miR-455-5p	gga-miR-6588-3p	gga-miR-6687-3p	gga-miR-7477-3p		gga-miR-144-3p	gga-miR-1610	gga-miR-1693	gga-miR-1778	gga-miR-216c	gga-miR-455-5p	gga-miR-6588-3p	gga-miR-6687-3p	gga-miR-7477-3p		R089
R090		gga-miR-144-5p	gga-miR-1611	gga-miR-1694	gga-miR-1779	gga-miR-217-3p	gga-miR-456-3p	gga-miR-6589-5p	gga-miR-6688-3p	gga-miR-7477-5p		gga-miR-144-5p	gga-miR-1611	gga-miR-1694	gga-miR-1779	gga-miR-217-3p	gga-miR-456-3p	gga-miR-6589-5p	gga-miR-6688-3p	gga-miR-7477-5p		gga-miR-144-5p	gga-miR-1611	gga-miR-1694	gga-miR-1779	gga-miR-217-3p	gga-miR-456-3p	gga-miR-6589-5p	gga-miR-6688-3p	gga-miR-7477-5p		R090
R091		gga-miR-1451-3p	gga-miR-1612	gga-miR-1695	gga-miR-1780	gga-miR-217-5p	gga-miR-456-5p	gga-miR-6590-3p	gga-miR-6689-3p	gga-miR-7478-3p		gga-miR-1451-3p	gga-miR-1612	gga-miR-1695	gga-miR-1780	gga-miR-217-5p	gga-miR-456-5p	gga-miR-6590-3p	gga-miR-6689-3p	gga-miR-7478-3p		gga-miR-1451-3p	gga-miR-1612	gga-miR-1695	gga-miR-1780	gga-miR-217-5p	gga-miR-456-5p	gga-miR-6590-3p	gga-miR-6689-3p	gga-miR-7478-3p		R091
R092		gga-miR-1451-5p	gga-miR-1613	gga-miR-1696	gga-miR-1781-3p	gga-miR-218-3p	gga-miR-458a-3p	gga-miR-6590-5p	gga-miR-6690-5p	gga-miR-7478-5p		gga-miR-1451-5p	gga-miR-1613	gga-miR-1696	gga-miR-1781-3p	gga-miR-218-3p	gga-miR-458a-3p	gga-miR-6590-5p	gga-miR-6690-5p	gga-miR-7478-5p		gga-miR-1451-5p	gga-miR-1613	gga-miR-1696	gga-miR-1781-3p	gga-miR-218-3p	gga-miR-458a-3p	gga-miR-6590-5p	gga-miR-6690-5p	gga-miR-7478-5p		R092
R093		gga-miR-1452	gga-miR-16-1-3p	gga-miR-1697	gga-miR-1781-5p	gga-miR-218-5p	gga-miR-458a-5p	gga-miR-6591-3p	gga-miR-6691-5p	gga-miR-7479-3p		gga-miR-1452	gga-miR-16-1-3p	gga-miR-1697	gga-miR-1781-5p	gga-miR-218-5p	gga-miR-458a-5p	gga-miR-6591-3p	gga-miR-6691-5p	gga-miR-7479-3p		gga-miR-1452	gga-miR-16-1-3p	gga-miR-1697	gga-miR-1781-5p	gga-miR-218-5p	gga-miR-458a-5p	gga-miR-6591-3p	gga-miR-6691-5p	gga-miR-7479-3p		R093
R094		gga-miR-1453	gga-miR-1614-3p	gga-miR-1698	gga-miR-1782	gga-miR-2188-3p	gga-miR-458b-3p	gga-miR-6592-3p	gga-miR-6692-5p	gga-miR-7479-5p		gga-miR-1453	gga-miR-1614-3p	gga-miR-1698	gga-miR-1782	gga-miR-2188-3p	gga-miR-458b-3p	gga-miR-6592-3p	gga-miR-6692-5p	gga-miR-7479-5p		gga-miR-1453	gga-miR-1614-3p	gga-miR-1698	gga-miR-1782	gga-miR-2188-3p	gga-miR-458b-3p	gga-miR-6592-3p	gga-miR-6692-5p	gga-miR-7479-5p		R094
R095		gga-miR-1454	gga-miR-1614-5p	gga-miR-1699	gga-miR-1783	gga-miR-2188-5p	gga-miR-458b-5p	gga-miR-6593-3p	gga-miR-6693-3p	gga-miR-7480-3p		gga-miR-1454	gga-miR-1614-5p	gga-miR-1699	gga-miR-1783	gga-miR-2188-5p	gga-miR-458b-5p	gga-miR-6593-3p	gga-miR-6693-3p	gga-miR-7480-3p		gga-miR-1454	gga-miR-1614-5p	gga-miR-1699	gga-miR-1783	gga-miR-2188-5p	gga-miR-458b-5p	gga-miR-6593-3p	gga-miR-6693-3p	gga-miR-7480-3p		R095
R096		gga-miR-1456-3p	gga-miR-1615	gga-miR-16c-3p	gga-miR-1784-5p	gga-miR-219a	gga-miR-460a-3p	gga-miR-6593-5p	gga-miR-6694-3p	gga-miR-7480-5p		gga-miR-1456-3p	gga-miR-1615	gga-miR-16c-3p	gga-miR-1784-5p	gga-miR-219a	gga-miR-460a-3p	gga-miR-6593-5p	gga-miR-6694-3p	gga-miR-7480-5p		gga-miR-1456-3p	gga-miR-1615	gga-miR-16c-3p	gga-miR-1784-5p	gga-miR-219a	gga-miR-460a-3p	gga-miR-6593-5p	gga-miR-6694-3p	gga-miR-7480-5p		R096
R097		gga-miR-1456-5p	gga-miR-1616	gga-miR-16c-5p	gga-miR-1785	gga-miR-219b	gga-miR-460a-5p	gga-miR-6594-5p	gga-miR-6695-5p	gga-miR-7481-3p		gga-miR-1456-5p	gga-miR-1616	gga-miR-16c-5p	gga-miR-1785	gga-miR-219b	gga-miR-460a-5p	gga-miR-6594-5p	gga-miR-6695-5p	gga-miR-7481-3p		gga-miR-1456-5p	gga-miR-1616	gga-miR-16c-5p	gga-miR-1785	gga-miR-219b	gga-miR-460a-5p	gga-miR-6594-5p	gga-miR-6695-5p	gga-miR-7481-3p		R097
R098		gga-miR-1457	gga-miR-1617	gga-miR-1700	gga-miR-1786	gga-miR-221-3p	gga-miR-460b-3p	gga-miR-6595-5p	gga-miR-6696-3p	gga-miR-7481-5p		gga-miR-1457	gga-miR-1617	gga-miR-1700	gga-miR-1786	gga-miR-221-3p	gga-miR-460b-3p	gga-miR-6595-5p	gga-miR-6696-3p	gga-miR-7481-5p		gga-miR-1457	gga-miR-1617	gga-miR-1700	gga-miR-1786	gga-miR-221-3p	gga-miR-460b-3p	gga-miR-6595-5p	gga-miR-6696-3p	gga-miR-7481-5p		R098
R099		gga-miR-1458	gga-miR-1618-3p	gga-miR-1701	gga-miR-1787	gga-miR-221-5p	gga-miR-460b-5p	gga-miR-6596-3p	gga-miR-6696-5p	gga-miR-7482-3p		gga-miR-1458	gga-miR-1618-3p	gga-miR-1701	gga-miR-1787	gga-miR-221-5p	gga-miR-460b-5p	gga-miR-6596-3p	gga-miR-6696-5p	gga-miR-7482-3p		gga-miR-1458	gga-miR-1618-3p	gga-miR-1701	gga-miR-1787	gga-miR-221-5p	gga-miR-460b-5p	gga-miR-6596-3p	gga-miR-6696-5p	gga-miR-7482-3p		R099
R100		gga-miR-1459	gga-miR-1618-5p	gga-miR-1702	gga-miR-1788-3p	gga-miR-222a	gga-miR-466	gga-miR-6596-5p	gga-miR-6697-5p	gga-miR-7482-5p		gga-miR-1459	gga-miR-1618-5p	gga-miR-1702	gga-miR-1788-3p	gga-miR-222a	gga-miR-466	gga-miR-6596-5p	gga-miR-6697-5p	gga-miR-7482-5p		gga-miR-1459	gga-miR-1618-5p	gga-miR-1702	gga-miR-1788-3p	gga-miR-222a	gga-miR-466	gga-miR-6596-5p	gga-miR-6697-5p	gga-miR-7482-5p		R100
R101		gga-miR-1460	gga-miR-1619	gga-miR-1703-3p	gga-miR-1788-5p	gga-miR-222b-3p	gga-miR-4732-5p	gga-miR-6597-3p	gga-miR-6698-3p	gga-miR-7483-3p		gga-miR-1460	gga-miR-1619	gga-miR-1703-3p	gga-miR-1788-5p	gga-miR-222b-3p	gga-miR-4732-5p	gga-miR-6597-3p	gga-miR-6698-3p	gga-miR-7483-3p		gga-miR-1460	gga-miR-1619	gga-miR-1703-3p	gga-miR-1788-5p	gga-miR-222b-3p	gga-miR-4732-5p	gga-miR-6597-3p	gga-miR-6698-3p	gga-miR-7483-3p		R101
R102		gga-miR-1462-3p	gga-miR-1620	gga-miR-1703-5p	gga-miR-1789	gga-miR-222b-5p	gga-miR-489-3p	gga-miR-6598-5p	gga-miR-6699-5p	gga-miR-7483-5p		gga-miR-1462-3p	gga-miR-1620	gga-miR-1703-5p	gga-miR-1789	gga-miR-222b-5p	gga-miR-489-3p	gga-miR-6598-5p	gga-miR-6699-5p	gga-miR-7483-5p		gga-miR-1462-3p	gga-miR-1620	gga-miR-1703-5p	gga-miR-1789	gga-miR-222b-5p	gga-miR-489-3p	gga-miR-6598-5p	gga-miR-6699-5p	gga-miR-7483-5p		R102
R103		gga-miR-1462-5p	gga-miR-1621-3p	gga-miR-1704	gga-miR-1790	gga-miR-223	gga-miR-489-5p	gga-miR-6599-3p	gga-miR-6700-3p	gga-miR-757		gga-miR-1462-5p	gga-miR-1621-3p	gga-miR-1704	gga-miR-1790	gga-miR-223	gga-miR-489-5p	gga-miR-6599-3p	gga-miR-6700-3p	gga-miR-757		gga-miR-1462-5p	gga-miR-1621-3p	gga-miR-1704	gga-miR-1790	gga-miR-223	gga-miR-489-5p	gga-miR-6599-3p	gga-miR-6700-3p	gga-miR-757		R103
R104		gga-miR-1463	gga-miR-1621-5p	gga-miR-1705	gga-miR-1791-3p	gga-miR-22-3p	gga-miR-490-3p	gga-miR-6599-5p	gga-miR-6700-5p	gga-miR-762		gga-miR-1463	gga-miR-1621-5p	gga-miR-1705	gga-miR-1791-3p	gga-miR-22-3p	gga-miR-490-3p	gga-miR-6599-5p	gga-miR-6700-5p	gga-miR-762		gga-miR-1463	gga-miR-1621-5p	gga-miR-1705	gga-miR-1791-3p	gga-miR-22-3p	gga-miR-490-3p	gga-miR-6599-5p	gga-miR-6700-5p	gga-miR-762		R104
R105		gga-miR-1464	gga-miR-1622	gga-miR-1706	gga-miR-1791-5p	gga-miR-22-5p	gga-miR-490-5p	gga-miR-6600-3p	gga-miR-6701-3p	gga-miR-7b		gga-miR-1464	gga-miR-1622	gga-miR-1706	gga-miR-1791-5p	gga-miR-22-5p	gga-miR-490-5p	gga-miR-6600-3p	gga-miR-6701-3p	gga-miR-7b		gga-miR-1464	gga-miR-1622	gga-miR-1706	gga-miR-1791-5p	gga-miR-22-5p	gga-miR-490-5p	gga-miR-6600-3p	gga-miR-6701-3p	gga-miR-7b		R105
R106		gga-miR-1465	gga-miR-1623	gga-miR-1707	gga-miR-1792	gga-miR-23b-3p	gga-miR-499-3p	gga-miR-6601-3p	gga-miR-6702-5p	gga-miR-92-3p		gga-miR-1465	gga-miR-1623	gga-miR-1707	gga-miR-1792	gga-miR-23b-3p	gga-miR-499-3p	gga-miR-6601-3p	gga-miR-6702-5p	gga-miR-92-3p		gga-miR-1465	gga-miR-1623	gga-miR-1707	gga-miR-1792	gga-miR-23b-3p	gga-miR-499-3p	gga-miR-6601-3p	gga-miR-6702-5p	gga-miR-92-3p		R106
R107		gga-miR-1466	gga-miR-16-2-3p	gga-miR-1708	gga-miR-1793	gga-miR-23b-5p	gga-miR-499-5p	gga-miR-6602-5p	gga-miR-6703-3p	gga-miR-92-5p		gga-miR-1466	gga-miR-16-2-3p	gga-miR-1708	gga-miR-1793	gga-miR-23b-5p	gga-miR-499-5p	gga-miR-6602-5p	gga-miR-6703-3p	gga-miR-92-5p		gga-miR-1466	gga-miR-16-2-3p	gga-miR-1708	gga-miR-1793	gga-miR-23b-5p	gga-miR-499-5p	gga-miR-6602-5p	gga-miR-6703-3p	gga-miR-92-5p		R107
R108		gga-miR-1467-3p	gga-miR-1624	gga-miR-1709	gga-miR-1794	gga-miR-24-3p	gga-miR-551-3p	gga-miR-6603-3p	gga-miR-6704-5p	gga-miR-9-3p		gga-miR-1467-3p	gga-miR-1624	gga-miR-1709	gga-miR-1794	gga-miR-24-3p	gga-miR-551-3p	gga-miR-6603-3p	gga-miR-6704-5p	gga-miR-9-3p		gga-miR-1467-3p	gga-miR-1624	gga-miR-1709	gga-miR-1794	gga-miR-24-3p	gga-miR-551-3p	gga-miR-6603-3p	gga-miR-6704-5p	gga-miR-9-3p		R108
R109		gga-miR-1467-5p	gga-miR-1625-3p	gga-miR-1710	gga-miR-1795	gga-miR-24-5p	gga-miR-551-5p	gga-miR-6604-5p	gga-miR-6705-5p	gga-miR-9-5p		gga-miR-1467-5p	gga-miR-1625-3p	gga-miR-1710	gga-miR-1795	gga-miR-24-5p	gga-miR-551-5p	gga-miR-6604-5p	gga-miR-6705-5p	gga-miR-9-5p		gga-miR-1467-5p	gga-miR-1625-3p	gga-miR-1710	gga-miR-1795	gga-miR-24-5p	gga-miR-551-5p	gga-miR-6604-5p	gga-miR-6705-5p	gga-miR-9-5p		R109
R110		gga-miR-146a-3p	gga-miR-1625-5p	gga-miR-1711	gga-miR-1796	gga-miR-26a-3p	gga-miR-6516-3p	gga-miR-6605-5p	gga-miR-6706-5p	gga-miR-99a-3p		gga-miR-146a-3p	gga-miR-1625-5p	gga-miR-1711	gga-miR-1796	gga-miR-26a-3p	gga-miR-6516-3p	gga-miR-6605-5p	gga-miR-6706-5p	gga-miR-99a-3p		gga-miR-146a-3p	gga-miR-1625-5p	gga-miR-1711	gga-miR-1796	gga-miR-26a-3p	gga-miR-6516-3p	gga-miR-6605-5p	gga-miR-6706-5p	gga-miR-99a-3p		R110
R111		gga-miR-146a-5p	gga-miR-1626-3p	gga-miR-1712-3p	gga-miR-1797	gga-miR-26a-5p	gga-miR-6516-5p	gga-miR-6606-5p	gga-miR-6707-5p	gga-miR-99a-5p		gga-miR-146a-5p	gga-miR-1626-3p	gga-miR-1712-3p	gga-miR-1797	gga-miR-26a-5p	gga-miR-6516-5p	gga-miR-6606-5p	gga-miR-6707-5p	gga-miR-99a-5p		gga-miR-146a-5p	gga-miR-1626-3p	gga-miR-1712-3p	gga-miR-1797	gga-miR-26a-5p	gga-miR-6516-5p	gga-miR-6606-5p	gga-miR-6707-5p	gga-miR-99a-5p		R111
R112		gga-miR-146b-3p	gga-miR-1626-5p	gga-miR-1712-5p	gga-miR-1798-3p	gga-miR-27b-3p	gga-miR-6542-3p	gga-miR-6607-5p	gga-miR-6708-5p			gga-miR-146b-3p	gga-miR-1626-5p	gga-miR-1712-5p	gga-miR-1798-3p	gga-miR-27b-3p	gga-miR-6542-3p	gga-miR-6607-5p	gga-miR-6708-5p			gga-miR-146b-3p	gga-miR-1626-5p	gga-miR-1712-5p	gga-miR-1798-3p	gga-miR-27b-3p	gga-miR-6542-3p	gga-miR-6607-5p	gga-miR-6708-5p			R112
R113		gga-miR-146b-5p	gga-miR-1627-3p	gga-miR-1713	gga-miR-1798-5p	gga-miR-27b-5p	gga-miR-6542-5p	gga-miR-6608-3p	gga-miR-6709-5p			gga-miR-146b-5p	gga-miR-1627-3p	gga-miR-1713	gga-miR-1798-5p	gga-miR-27b-5p	gga-miR-6542-5p	gga-miR-6608-3p	gga-miR-6709-5p			gga-miR-146b-5p	gga-miR-1627-3p	gga-miR-1713	gga-miR-1798-5p	gga-miR-27b-5p	gga-miR-6542-5p	gga-miR-6608-3p	gga-miR-6709-5p			R113
R114		gga-miR-146c-3p	gga-miR-1627-5p	gga-miR-1714	gga-miR-1799	gga-miR-2954	gga-miR-6543-3p	gga-miR-6608-5p	gga-miR-6710-3p			gga-miR-146c-3p	gga-miR-1627-5p	gga-miR-1714	gga-miR-1799	gga-miR-2954	gga-miR-6543-3p	gga-miR-6608-5p	gga-miR-6710-3p			gga-miR-146c-3p	gga-miR-1627-5p	gga-miR-1714	gga-miR-1799	gga-miR-2954	gga-miR-6543-3p	gga-miR-6608-5p	gga-miR-6710-3p			R114
R115		gga-miR-146c-5p	gga-miR-1628	gga-miR-1715-3p	gga-miR-1800	gga-miR-29a-3p	gga-miR-6543-5p	gga-miR-6609-3p	gga-miR-6711-5p			gga-miR-146c-5p	gga-miR-1628	gga-miR-1715-3p	gga-miR-1800	gga-miR-29a-3p	gga-miR-6543-5p	gga-miR-6609-3p	gga-miR-6711-5p			gga-miR-146c-5p	gga-miR-1628	gga-miR-1715-3p	gga-miR-1800	gga-miR-29a-3p	gga-miR-6543-5p	gga-miR-6609-3p	gga-miR-6711-5p			R115
R116		gga-miR-147	gga-miR-1629	gga-miR-1715-5p	gga-miR-1801	gga-miR-29a-5p	gga-miR-6544-3p	gga-miR-6610-3p	gga-miR-6712-5p			gga-miR-147	gga-miR-1629	gga-miR-1715-5p	gga-miR-1801	gga-miR-29a-5p	gga-miR-6544-3p	gga-miR-6610-3p	gga-miR-6712-5p			gga-miR-147	gga-miR-1629	gga-miR-1715-5p	gga-miR-1801	gga-miR-29a-5p	gga-miR-6544-3p	gga-miR-6610-3p	gga-miR-6712-5p			R116
R117		gga-miR-148a-3p	gga-miR-1630	gga-miR-1716	gga-miR-1802	gga-miR-29b-1-5p	gga-miR-6544-5p	gga-miR-6611-5p	gga-miR-6713-3p			gga-miR-148a-3p	gga-miR-1630	gga-miR-1716	gga-miR-1802	gga-miR-29b-1-5p	gga-miR-6544-5p	gga-miR-6611-5p	gga-miR-6713-3p			gga-miR-148a-3p	gga-miR-1630	gga-miR-1716	gga-miR-1802	gga-miR-29b-1-5p	gga-miR-6544-5p	gga-miR-6611-5p	gga-miR-6713-3p			R117
R118		gga-miR-148a-5p	gga-miR-1631	gga-miR-1717	gga-miR-1803	gga-miR-29b-2-5p	gga-miR-6545-3p	gga-miR-6612-5p	gga-miR-6714-3p			gga-miR-148a-5p	gga-miR-1631	gga-miR-1717	gga-miR-1803	gga-miR-29b-2-5p	gga-miR-6545-3p	gga-miR-6612-5p	gga-miR-6714-3p			gga-miR-148a-5p	gga-miR-1631	gga-miR-1717	gga-miR-1803	gga-miR-29b-2-5p	gga-miR-6545-3p	gga-miR-6612-5p	gga-miR-6714-3p			R118
R119		gga-miR-153-3p	gga-miR-1632-3p	gga-miR-1718	gga-miR-1804	gga-miR-29b-3p	gga-miR-6545-5p	gga-miR-6613-3p	gga-miR-7			gga-miR-153-3p	gga-miR-1632-3p	gga-miR-1718	gga-miR-1804	gga-miR-29b-3p	gga-miR-6545-5p	gga-miR-6613-3p	gga-miR-7			gga-miR-153-3p	gga-miR-1632-3p	gga-miR-1718	gga-miR-1804	gga-miR-29b-3p	gga-miR-6545-5p	gga-miR-6613-3p	gga-miR-7			R119
R120	a2-PUC2PM-20B										a2-PUC2PM-20B										a2-PUC2PM-20B										a2-PUC2PM-20B	R120
R121	a2-PUC2MM-20B										a2-PUC2MM-20B										a2-PUC2MM-20B										a2-PUC2MM-20B	R121
R122	a3-PUC2PM-20B										a3-PUC2PM-20B										a3-PUC2PM-20B										a3-PUC2PM-20B	R122
R123	a3-PUC2MM-20B										a3-PUC2MM-20B										a3-PUC2MM-20B										a3-PUC2MM-20B	R123
R124	PUC2PM-20B										PUC2PM-20B										PUC2PM-20B										PUC2PM-20B	R124
R125	PUC2MM-20B										PUC2MM-20B										PUC2MM-20B										PUC2MM-20B	R125
R126	BKG0										BKG0										BKG0										BKG0	R126
R127	PUC2PM										PUC2PM										PUC2PM										PUC2PM	R127
R128	PUC2MM										PUC2MM										PUC2MM										PUC2MM	R128

## Sheet: Data Layout
Reporter ID	Reporter Name	Target Seq (5' to 3')	Block	Row	Column	Group	Reporter Control Type	Note	Reporter Source	Accession No.	Chicken
1	BKG0		1	1	1	control	control_empty	LC Internal Use	control
2	empty		1	1	2	control	control_empty
3	empty		1	1	3	control	control_empty
4	empty		1	1	4	control	control_empty
5	empty		1	1	5	control	control_empty
6	empty		1	1	6	control	control_empty
7	empty		1	1	7	control	control_empty
8	empty		1	1	8	control	control_empty
9	empty		1	1	9	control	control_empty
10	empty		1	1	10	control	control_empty
11	BKG0		1	1	11	control	control_empty	LC Internal Use	control
12	empty		1	1	12	control	control_empty
13	empty		1	1	13	control	control_empty
14	empty		1	1	14	control	control_empty
15	empty		1	1	15	control	control_empty
16	empty		1	1	16	control	control_empty
17	empty		1	1	17	control	control_empty
18	empty		1	1	18	control	control_empty
19	empty		1	1	19	control	control_empty
20	empty		1	1	20	control	control_empty
21	BKG0		1	1	21	control	control_empty	LC Internal Use	control
22	empty		1	1	22	control	control_empty
23	empty		1	1	23	control	control_empty
24	empty		1	1	24	control	control_empty
25	empty		1	1	25	control	control_empty
26	empty		1	1	26	control	control_empty
27	empty		1	1	27	control	control_empty
28	empty		1	1	28	control	control_empty
29	empty		1	1	29	control	control_empty
30	empty		1	1	30	control	control_empty
31	BKG0		1	1	31	control	control_empty	LC Internal Use	control
32	PUC2PM		1	2	1	control	control_spike_calibration	LC Internal Use	control
33	empty		1	2	2	control	control_empty
34	empty		1	2	3	control	control_empty
35	empty		1	2	4	control	control_empty
36	empty		1	2	5	control	control_empty
37	empty		1	2	6	control	control_empty
38	empty		1	2	7	control	control_empty
39	empty		1	2	8	control	control_empty
40	empty		1	2	9	control	control_empty
41	empty		1	2	10	control	control_empty
42	PUC2PM		1	2	11	control	control_spike_calibration	LC Internal Use	control
43	empty		1	2	12	control	control_empty
44	empty		1	2	13	control	control_empty
45	empty		1	2	14	control	control_empty
46	empty		1	2	15	control	control_empty
47	empty		1	2	16	control	control_empty
48	empty		1	2	17	control	control_empty
49	empty		1	2	18	control	control_empty
50	empty		1	2	19	control	control_empty
51	empty		1	2	20	control	control_empty
52	PUC2PM		1	2	21	control	control_spike_calibration	LC Internal Use	control
53	empty		1	2	22	control	control_empty
54	empty		1	2	23	control	control_empty
55	empty		1	2	24	control	control_empty
56	empty		1	2	25	control	control_empty
57	empty		1	2	26	control	control_empty
58	empty		1	2	27	control	control_empty
59	empty		1	2	28	control	control_empty
60	empty		1	2	29	control	control_empty
61	empty		1	2	30	control	control_empty
62	PUC2PM		1	2	31	control	control_spike_calibration	LC Internal Use	control
63	PUC2MM		1	3	1	control	control_spike_calibration	LC Internal Use	control
64	empty		1	3	2	control	control_empty
65	empty		1	3	3	control	control_empty
66	empty		1	3	4	control	control_empty
67	empty		1	3	5	control	control_empty
68	empty		1	3	6	control	control_empty
69	empty		1	3	7	control	control_empty
70	empty		1	3	8	control	control_empty
71	empty		1	3	9	control	control_empty
72	empty		1	3	10	control	control_empty
73	PUC2MM		1	3	11	control	control_spike_calibration	LC Internal Use	control
74	empty		1	3	12	control	control_empty
75	empty		1	3	13	control	control_empty
76	empty		1	3	14	control	control_empty
77	empty		1	3	15	control	control_empty
78	empty		1	3	16	control	control_empty
79	empty		1	3	17	control	control_empty
80	empty		1	3	18	control	control_empty
81	empty		1	3	19	control	control_empty
82	empty		1	3	20	control	control_empty
83	PUC2MM		1	3	21	control	control_spike_calibration	LC Internal Use	control
84	empty		1	3	22	control	control_empty
85	empty		1	3	23	control	control_empty
86	empty		1	3	24	control	control_empty
87	empty		1	3	25	control	control_empty
88	empty		1	3	26	control	control_empty
89	empty		1	3	27	control	control_empty
90	empty		1	3	28	control	control_empty
91	empty		1	3	29	control	control_empty
92	empty		1	3	30	control	control_empty
93	PUC2MM		1	3	31	control	control_spike_calibration	LC Internal Use	control
94	BKG0		1	4	1	control	control_empty	LC Internal Use	control
95	empty		1	4	2	control	control_empty
96	empty		1	4	3	control	control_empty
97	empty		1	4	4	control	control_empty
98	empty		1	4	5	control	control_empty
99	empty		1	4	6	control	control_empty
100	empty		1	4	7	control	control_empty
101	empty		1	4	8	control	control_empty
102	empty		1	4	9	control	control_empty
103	empty		1	4	10	control	control_empty
104	BKG0		1	4	11	control	control_empty	LC Internal Use	control
105	empty		1	4	12	control	control_empty
106	empty		1	4	13	control	control_empty
107	empty		1	4	14	control	control_empty
108	empty		1	4	15	control	control_empty
109	empty		1	4	16	control	control_empty
110	empty		1	4	17	control	control_empty
111	empty		1	4	18	control	control_empty
112	empty		1	4	19	control	control_empty
113	empty		1	4	20	control	control_empty
114	BKG0		1	4	21	control	control_empty	LC Internal Use	control
115	empty		1	4	22	control	control_empty
116	empty		1	4	23	control	control_empty
117	empty		1	4	24	control	control_empty
118	empty		1	4	25	control	control_empty
119	empty		1	4	26	control	control_empty
120	empty		1	4	27	control	control_empty
121	empty		1	4	28	control	control_empty
122	empty		1	4	29	control	control_empty
123	empty		1	4	30	control	control_empty
124	BKG0		1	4	31	control	control_empty	LC Internal Use	control
125	PUC2PM-20B		1	5	1	control	control_spike_calibration	LC Internal Use	control
126	empty		1	5	2	control	control_empty
127	empty		1	5	3	control	control_empty
128	empty		1	5	4	control	control_empty
129	empty		1	5	5	control	control_empty
130	empty		1	5	6	control	control_empty
131	empty		1	5	7	control	control_empty
132	empty		1	5	8	control	control_empty
133	empty		1	5	9	control	control_empty
134	empty		1	5	10	control	control_empty
135	PUC2PM-20B		1	5	11	control	control_spike_calibration	LC Internal Use	control
136	empty		1	5	12	control	control_empty
137	empty		1	5	13	control	control_empty
138	empty		1	5	14	control	control_empty
139	empty		1	5	15	control	control_empty
140	empty		1	5	16	control	control_empty
141	empty		1	5	17	control	control_empty
142	empty		1	5	18	control	control_empty
143	empty		1	5	19	control	control_empty
144	empty		1	5	20	control	control_empty
145	PUC2PM-20B		1	5	21	control	control_spike_calibration	LC Internal Use	control
146	empty		1	5	22	control	control_empty
147	empty		1	5	23	control	control_empty
148	empty		1	5	24	control	control_empty
149	empty		1	5	25	control	control_empty
150	empty		1	5	26	control	control_empty
151	empty		1	5	27	control	control_empty
152	empty		1	5	28	control	control_empty
153	empty		1	5	29	control	control_empty
154	empty		1	5	30	control	control_empty
155	PUC2PM-20B		1	5	31	control	control_spike_calibration	LC Internal Use	control
156	PUC2MM-20B		1	6	1	control	control_spike_calibration	LC Internal Use	control
157	empty		1	6	2	control	control_empty
158	empty		1	6	3	control	control_empty
159	empty		1	6	4	control	control_empty
160	empty		1	6	5	control	control_empty
161	empty		1	6	6	control	control_empty
162	empty		1	6	7	control	control_empty
163	empty		1	6	8	control	control_empty
164	empty		1	6	9	control	control_empty
165	empty		1	6	10	control	control_empty
166	PUC2MM-20B		1	6	11	control	control_spike_calibration	LC Internal Use	control
167	empty		1	6	12	control	control_empty
168	empty		1	6	13	control	control_empty
169	empty		1	6	14	control	control_empty
170	empty		1	6	15	control	control_empty
171	empty		1	6	16	control	control_empty
172	empty		1	6	17	control	control_empty
173	empty		1	6	18	control	control_empty
174	empty		1	6	19	control	control_empty
175	empty		1	6	20	control	control_empty
176	PUC2MM-20B		1	6	21	control	control_spike_calibration	LC Internal Use	control
177	empty		1	6	22	control	control_empty
178	empty		1	6	23	control	control_empty
179	empty		1	6	24	control	control_empty
180	empty		1	6	25	control	control_empty
181	empty		1	6	26	control	control_empty
182	empty		1	6	27	control	control_empty
183	empty		1	6	28	control	control_empty
184	empty		1	6	29	control	control_empty
185	empty		1	6	30	control	control_empty
186	PUC2MM-20B		1	6	31	control	control_spike_calibration	LC Internal Use	control
187	a2-PUC2PM-20B		1	7	1	control	control_spike_calibration	LC Internal Use	control
188	empty		1	7	2	control	control_empty
189	empty		1	7	3	control	control_empty
190	empty		1	7	4	control	control_empty
191	empty		1	7	5	control	control_empty
192	empty		1	7	6	control	control_empty
193	empty		1	7	7	control	control_empty
194	empty		1	7	8	control	control_empty
195	empty		1	7	9	control	control_empty
196	empty		1	7	10	control	control_empty
197	a2-PUC2PM-20B		1	7	11	control	control_spike_calibration	LC Internal Use	control
198	empty		1	7	12	control	control_empty
199	empty		1	7	13	control	control_empty
200	empty		1	7	14	control	control_empty
201	empty		1	7	15	control	control_empty
202	empty		1	7	16	control	control_empty
203	empty		1	7	17	control	control_empty
204	empty		1	7	18	control	control_empty
205	empty		1	7	19	control	control_empty
206	empty		1	7	20	control	control_empty
207	a2-PUC2PM-20B		1	7	21	control	control_spike_calibration	LC Internal Use	control
208	empty		1	7	22	control	control_empty
209	empty		1	7	23	control	control_empty
210	empty		1	7	24	control	control_empty
211	empty		1	7	25	control	control_empty
212	empty		1	7	26	control	control_empty
213	empty		1	7	27	control	control_empty
214	empty		1	7	28	control	control_empty
215	empty		1	7	29	control	control_empty
216	empty		1	7	30	control	control_empty
217	a2-PUC2PM-20B		1	7	31	control	control_spike_calibration	LC Internal Use	control
218	a2-PUC2MM-20B		1	8	1	control	control_spike_calibration	LC Internal Use	control
219	empty		1	8	2	control	control_empty
220	empty		1	8	3	control	control_empty
221	empty		1	8	4	control	control_empty
222	empty		1	8	5	control	control_empty
223	empty		1	8	6	control	control_empty
224	empty		1	8	7	control	control_empty
225	empty		1	8	8	control	control_empty
226	empty		1	8	9	control	control_empty
227	empty		1	8	10	control	control_empty
228	a2-PUC2MM-20B		1	8	11	control	control_spike_calibration	LC Internal Use	control
229	empty		1	8	12	control	control_empty
230	empty		1	8	13	control	control_empty
231	empty		1	8	14	control	control_empty
232	empty		1	8	15	control	control_empty
233	empty		1	8	16	control	control_empty
234	empty		1	8	17	control	control_empty
235	empty		1	8	18	control	control_empty
236	empty		1	8	19	control	control_empty
237	empty		1	8	20	control	control_empty
238	a2-PUC2MM-20B		1	8	21	control	control_spike_calibration	LC Internal Use	control
239	empty		1	8	22	control	control_empty
240	empty		1	8	23	control	control_empty
241	empty		1	8	24	control	control_empty
242	empty		1	8	25	control	control_empty
243	empty		1	8	26	control	control_empty
244	empty		1	8	27	control	control_empty
245	empty		1	8	28	control	control_empty
246	empty		1	8	29	control	control_empty
247	empty		1	8	30	control	control_empty
248	a2-PUC2MM-20B		1	8	31	control	control_spike_calibration	LC Internal Use	control
249	a3-PUC2PM-20B		1	9	1	control	control_spike_calibration	LC Internal Use	control
250	gga-let-7a-2-3p	CUGUACAACCUCCUAGCUUUCC	1	9	2	experimental		mature miRNA	standard	MIMAT0031037	gga-let-7a-2-3p
251	gga-miR-153-5p	UCAUUUUUGUGAUGUUGCAGCU	1	9	3	experimental		mature miRNA	standard	MIMAT0026502	gga-miR-153-5p
252	gga-miR-1632-5p	UGCUUGUUUUUGGAUGAGCUUGC	1	9	4	experimental		mature miRNA	standard	MIMAT0007504	gga-miR-1632-5p
253	gga-miR-1719	AAAGAUGAUGAGUUGCUGAUG	1	9	5	experimental		mature miRNA	standard	MIMAT0007616	gga-miR-1719
254	gga-miR-1805-3p	UGUAUUGGAACACUACAGCUC	1	9	6	experimental		mature miRNA	standard	MIMAT0007723	gga-miR-1805-3p
255	gga-miR-29c-3p	UAGCACCAUUUGAAAUCGGU	1	9	7	experimental		mature miRNA	standard	MIMAT0001183	gga-miR-29c-3p
256	gga-miR-6546-3p	GGAGUUCAGCUGUGCUGCUGC	1	9	8	experimental		mature miRNA	standard	MIMAT0025596	gga-miR-6546-3p
257	gga-miR-6614-3p	ACAGGACAGCGAGAAGGC	1	9	9	experimental		mature miRNA	standard	MIMAT0025709	gga-miR-6614-3p
258	gga-miR-7437-3p	CUUCCUCCAACCUCAGUAUCA	1	9	10	experimental		mature miRNA	standard	MIMAT0029029	gga-miR-7437-3p
259	a3-PUC2PM-20B		1	9	11	control	control_spike_calibration	LC Internal Use	control
260	gga-let-7a-2-3p	CUGUACAACCUCCUAGCUUUCC	1	9	12	experimental		mature miRNA	standard	MIMAT0031037	gga-let-7a-2-3p
261	gga-miR-153-5p	UCAUUUUUGUGAUGUUGCAGCU	1	9	13	experimental		mature miRNA	standard	MIMAT0026502	gga-miR-153-5p
262	gga-miR-1632-5p	UGCUUGUUUUUGGAUGAGCUUGC	1	9	14	experimental		mature miRNA	standard	MIMAT0007504	gga-miR-1632-5p
263	gga-miR-1719	AAAGAUGAUGAGUUGCUGAUG	1	9	15	experimental		mature miRNA	standard	MIMAT0007616	gga-miR-1719
264	gga-miR-1805-3p	UGUAUUGGAACACUACAGCUC	1	9	16	experimental		mature miRNA	standard	MIMAT0007723	gga-miR-1805-3p
265	gga-miR-29c-3p	UAGCACCAUUUGAAAUCGGU	1	9	17	experimental		mature miRNA	standard	MIMAT0001183	gga-miR-29c-3p
266	gga-miR-6546-3p	GGAGUUCAGCUGUGCUGCUGC	1	9	18	experimental		mature miRNA	standard	MIMAT0025596	gga-miR-6546-3p
267	gga-miR-6614-3p	ACAGGACAGCGAGAAGGC	1	9	19	experimental		mature miRNA	standard	MIMAT0025709	gga-miR-6614-3p
268	gga-miR-7437-3p	CUUCCUCCAACCUCAGUAUCA	1	9	20	experimental		mature miRNA	standard	MIMAT0029029	gga-miR-7437-3p
269	a3-PUC2PM-20B		1	9	21	control	control_spike_calibration	LC Internal Use	control
270	gga-let-7a-2-3p	CUGUACAACCUCCUAGCUUUCC	1	9	22	experimental		mature miRNA	standard	MIMAT0031037	gga-let-7a-2-3p
271	gga-miR-153-5p	UCAUUUUUGUGAUGUUGCAGCU	1	9	23	experimental		mature miRNA	standard	MIMAT0026502	gga-miR-153-5p
272	gga-miR-1632-5p	UGCUUGUUUUUGGAUGAGCUUGC	1	9	24	experimental		mature miRNA	standard	MIMAT0007504	gga-miR-1632-5p
273	gga-miR-1719	AAAGAUGAUGAGUUGCUGAUG	1	9	25	experimental		mature miRNA	standard	MIMAT0007616	gga-miR-1719
274	gga-miR-1805-3p	UGUAUUGGAACACUACAGCUC	1	9	26	experimental		mature miRNA	standard	MIMAT0007723	gga-miR-1805-3p
275	gga-miR-29c-3p	UAGCACCAUUUGAAAUCGGU	1	9	27	experimental		mature miRNA	standard	MIMAT0001183	gga-miR-29c-3p
276	gga-miR-6546-3p	GGAGUUCAGCUGUGCUGCUGC	1	9	28	experimental		mature miRNA	standard	MIMAT0025596	gga-miR-6546-3p
277	gga-miR-6614-3p	ACAGGACAGCGAGAAGGC	1	9	29	experimental		mature miRNA	standard	MIMAT0025709	gga-miR-6614-3p
278	gga-miR-7437-3p	CUUCCUCCAACCUCAGUAUCA	1	9	30	experimental		mature miRNA	standard	MIMAT0029029	gga-miR-7437-3p
279	a3-PUC2PM-20B		1	9	31	control	control_spike_calibration	LC Internal Use	control
280	a3-PUC2MM-20B		1	10	1	control	control_spike_calibration	LC Internal Use	control
281	gga-let-7a-3p	CUAUACAAUCUACUGUCUUUCC	1	10	2	experimental		mature miRNA	standard	MIMAT0026491,MIMAT0026543	gga-let-7a-3p, gga-let-7k-3p
282	gga-miR-155	UUAAUGCUAAUCGUGAUAGGGG	1	10	3	experimental		mature miRNA	standard	MIMAT0001106	gga-miR-155
283	gga-miR-1633	UGCGCUUCUGCUCAGCUCGGUGU	1	10	4	experimental		mature miRNA	standard	MIMAT0007506	gga-miR-1633
284	gga-miR-1720-3p	AAGCAACGAGAGGUCGGUCUGA	1	10	5	experimental		mature miRNA	standard	MIMAT0007618	gga-miR-1720-3p
285	gga-miR-1805-5p	GAGUUGUAGUCUUUCAAACAGA	1	10	6	experimental		mature miRNA	standard	MIMAT0007722	gga-miR-1805-5p
286	gga-miR-29c-5p	CCGAUUUCUCUUGGUGUUCAG	1	10	7	experimental		mature miRNA	standard	MIMAT0026544	gga-miR-29c-5p
287	gga-miR-6546-5p	AGGAGCGCCUCUGAGCUCCCCU	1	10	8	experimental		mature miRNA	standard	MIMAT0025595	gga-miR-6546-5p
288	gga-miR-6615-3p	UGGCACUGAUGUGUUCUCCACA	1	10	9	experimental		mature miRNA	standard	MIMAT0025711	gga-miR-6615-3p
289	gga-miR-7437-5p	GAACAGAGCGUUGGAAGGUAGGG	1	10	10	experimental		mature miRNA	standard	MIMAT0029028	gga-miR-7437-5p
290	a3-PUC2MM-20B		1	10	11	control	control_spike_calibration	LC Internal Use	control
291	gga-let-7a-3p	CUAUACAAUCUACUGUCUUUCC	1	10	12	experimental		mature miRNA	standard	MIMAT0026491,MIMAT0026543	gga-let-7a-3p, gga-let-7k-3p
292	gga-miR-155	UUAAUGCUAAUCGUGAUAGGGG	1	10	13	experimental		mature miRNA	standard	MIMAT0001106	gga-miR-155
293	gga-miR-1633	UGCGCUUCUGCUCAGCUCGGUGU	1	10	14	experimental		mature miRNA	standard	MIMAT0007506	gga-miR-1633
294	gga-miR-1720-3p	AAGCAACGAGAGGUCGGUCUGA	1	10	15	experimental		mature miRNA	standard	MIMAT0007618	gga-miR-1720-3p
295	gga-miR-1805-5p	GAGUUGUAGUCUUUCAAACAGA	1	10	16	experimental		mature miRNA	standard	MIMAT0007722	gga-miR-1805-5p
296	gga-miR-29c-5p	CCGAUUUCUCUUGGUGUUCAG	1	10	17	experimental		mature miRNA	standard	MIMAT0026544	gga-miR-29c-5p
297	gga-miR-6546-5p	AGGAGCGCCUCUGAGCUCCCCU	1	10	18	experimental		mature miRNA	standard	MIMAT0025595	gga-miR-6546-5p
298	gga-miR-6615-3p	UGGCACUGAUGUGUUCUCCACA	1	10	19	experimental		mature miRNA	standard	MIMAT0025711	gga-miR-6615-3p
299	gga-miR-7437-5p	GAACAGAGCGUUGGAAGGUAGGG	1	10	20	experimental		mature miRNA	standard	MIMAT0029028	gga-miR-7437-5p
300	a3-PUC2MM-20B		1	10	21	control	control_spike_calibration	LC Internal Use	control
301	gga-let-7a-3p	CUAUACAAUCUACUGUCUUUCC	1	10	22	experimental		mature miRNA	standard	MIMAT0026491,MIMAT0026543	gga-let-7a-3p, gga-let-7k-3p
302	gga-miR-155	UUAAUGCUAAUCGUGAUAGGGG	1	10	23	experimental		mature miRNA	standard	MIMAT0001106	gga-miR-155
303	gga-miR-1633	UGCGCUUCUGCUCAGCUCGGUGU	1	10	24	experimental		mature miRNA	standard	MIMAT0007506	gga-miR-1633
304	gga-miR-1720-3p	AAGCAACGAGAGGUCGGUCUGA	1	10	25	experimental		mature miRNA	standard	MIMAT0007618	gga-miR-1720-3p
305	gga-miR-1805-5p	GAGUUGUAGUCUUUCAAACAGA	1	10	26	experimental		mature miRNA	standard	MIMAT0007722	gga-miR-1805-5p
306	gga-miR-29c-5p	CCGAUUUCUCUUGGUGUUCAG	1	10	27	experimental		mature miRNA	standard	MIMAT0026544	gga-miR-29c-5p
307	gga-miR-6546-5p	AGGAGCGCCUCUGAGCUCCCCU	1	10	28	experimental		mature miRNA	standard	MIMAT0025595	gga-miR-6546-5p
308	gga-miR-6615-3p	UGGCACUGAUGUGUUCUCCACA	1	10	29	experimental		mature miRNA	standard	MIMAT0025711	gga-miR-6615-3p
309	gga-miR-7437-5p	GAACAGAGCGUUGGAAGGUAGGG	1	10	30	experimental		mature miRNA	standard	MIMAT0029028	gga-miR-7437-5p
310	a3-PUC2MM-20B		1	10	31	control	control_spike_calibration	LC Internal Use	control
311	empty		1	11	1	control	control_empty
312	gga-let-7a-5p	UGAGGUAGUAGGUUGUAUAGUU	1	11	2	experimental		mature miRNA	standard	MIMAT0001101,MIMAT0001181	gga-let-7a-5p, gga-let-7j-5p
313	gga-miR-1550-3p	CUUCACUUACACUGCUCACUGGU	1	11	3	experimental		mature miRNA	standard	MIMAT0007404	gga-miR-1550-3p
314	gga-miR-1634	UGCGACGCAUCGGCCUUUCUUC	1	11	4	experimental		mature miRNA	standard	MIMAT0007507	gga-miR-1634
315	gga-miR-1720-5p	UGAUCACCUCGGACGUUGCUUU	1	11	5	experimental		mature miRNA	standard	MIMAT0007617	gga-miR-1720-5p
316	gga-miR-1806	AGGCAGGAUCACAAGGUCUGGA	1	11	6	experimental		mature miRNA	standard	MIMAT0007724	gga-miR-1806
317	gga-miR-301a-3p	CAGUGCAAUAAUAUUGUCAAAGCAU	1	11	7	experimental		mature miRNA	standard	MIMAT0001166	gga-miR-301a-3p
318	gga-miR-6547-3p	ACCCCUCCAUCCACCCACUCA	1	11	8	experimental		mature miRNA	standard	MIMAT0025598	gga-miR-6547-3p
319	gga-miR-6615-5p	UUGGGGACACCAUCAGAACAGCCA	1	11	9	experimental		mature miRNA	standard	MIMAT0025710	gga-miR-6615-5p
320	gga-miR-7438-3p	UGAGUUGUCUUCCUGAAUAGUU	1	11	10	experimental		mature miRNA	standard	MIMAT0029031	gga-miR-7438-3p
321	empty		1	11	11	control	control_empty
322	gga-let-7a-5p	UGAGGUAGUAGGUUGUAUAGUU	1	11	12	experimental		mature miRNA	standard	MIMAT0001101,MIMAT0001181	gga-let-7a-5p, gga-let-7j-5p
323	gga-miR-1550-3p	CUUCACUUACACUGCUCACUGGU	1	11	13	experimental		mature miRNA	standard	MIMAT0007404	gga-miR-1550-3p
324	gga-miR-1634	UGCGACGCAUCGGCCUUUCUUC	1	11	14	experimental		mature miRNA	standard	MIMAT0007507	gga-miR-1634
325	gga-miR-1720-5p	UGAUCACCUCGGACGUUGCUUU	1	11	15	experimental		mature miRNA	standard	MIMAT0007617	gga-miR-1720-5p
326	gga-miR-1806	AGGCAGGAUCACAAGGUCUGGA	1	11	16	experimental		mature miRNA	standard	MIMAT0007724	gga-miR-1806
327	gga-miR-301a-3p	CAGUGCAAUAAUAUUGUCAAAGCAU	1	11	17	experimental		mature miRNA	standard	MIMAT0001166	gga-miR-301a-3p
328	gga-miR-6547-3p	ACCCCUCCAUCCACCCACUCA	1	11	18	experimental		mature miRNA	standard	MIMAT0025598	gga-miR-6547-3p
329	gga-miR-6615-5p	UUGGGGACACCAUCAGAACAGCCA	1	11	19	experimental		mature miRNA	standard	MIMAT0025710	gga-miR-6615-5p
330	gga-miR-7438-3p	UGAGUUGUCUUCCUGAAUAGUU	1	11	20	experimental		mature miRNA	standard	MIMAT0029031	gga-miR-7438-3p
331	empty		1	11	21	control	control_empty
332	gga-let-7a-5p	UGAGGUAGUAGGUUGUAUAGUU	1	11	22	experimental		mature miRNA	standard	MIMAT0001101,MIMAT0001181	gga-let-7a-5p, gga-let-7j-5p
333	gga-miR-1550-3p	CUUCACUUACACUGCUCACUGGU	1	11	23	experimental		mature miRNA	standard	MIMAT0007404	gga-miR-1550-3p
334	gga-miR-1634	UGCGACGCAUCGGCCUUUCUUC	1	11	24	experimental		mature miRNA	standard	MIMAT0007507	gga-miR-1634
335	gga-miR-1720-5p	UGAUCACCUCGGACGUUGCUUU	1	11	25	experimental		mature miRNA	standard	MIMAT0007617	gga-miR-1720-5p
336	gga-miR-1806	AGGCAGGAUCACAAGGUCUGGA	1	11	26	experimental		mature miRNA	standard	MIMAT0007724	gga-miR-1806
337	gga-miR-301a-3p	CAGUGCAAUAAUAUUGUCAAAGCAU	1	11	27	experimental		mature miRNA	standard	MIMAT0001166	gga-miR-301a-3p
338	gga-miR-6547-3p	ACCCCUCCAUCCACCCACUCA	1	11	28	experimental		mature miRNA	standard	MIMAT0025598	gga-miR-6547-3p
339	gga-miR-6615-5p	UUGGGGACACCAUCAGAACAGCCA	1	11	29	experimental		mature miRNA	standard	MIMAT0025710	gga-miR-6615-5p
340	gga-miR-7438-3p	UGAGUUGUCUUCCUGAAUAGUU	1	11	30	experimental		mature miRNA	standard	MIMAT0029031	gga-miR-7438-3p
341	empty		1	11	31	control	control_empty
342	empty		1	12	1	control	control_empty
343	gga-let-7b	UGAGGUAGUAGGUUGUGUGGUU	1	12	2	experimental		mature miRNA	standard	MIMAT0001102	gga-let-7b
344	gga-miR-1550-5p	UGAUGGGGGUGUAGUGCAGCA	1	12	3	experimental		mature miRNA	standard	MIMAT0007403	gga-miR-1550-5p
345	gga-miR-1635	UGCCCAGGCUGUGCUGUGCUCUGGG	1	12	4	experimental		mature miRNA	standard	MIMAT0007508	gga-miR-1635
346	gga-miR-1721	AGAGAUGAUGUUGGUCUGAUG	1	12	5	experimental		mature miRNA	standard	MIMAT0007619	gga-miR-1721
347	gga-miR-1807	GCAGAAUGAGGCUAGAGCUGAG	1	12	6	experimental		mature miRNA	standard	MIMAT0007725	gga-miR-1807
348	gga-miR-301a-5p	UCUGACAAUGUUGCACUACU	1	12	7	experimental		mature miRNA	standard	MIMAT0026531	gga-miR-301a-5p
349	gga-miR-6547-5p	GUGGGAUGUGGGGACGGGGUGA	1	12	8	experimental		mature miRNA	standard	MIMAT0025597	gga-miR-6547-5p
350	gga-miR-6616-5p	GCUCUGUGAUGGCUAGCUGAGA	1	12	9	experimental		mature miRNA	standard	MIMAT0025712	gga-miR-6616-5p
351	gga-miR-7438-5p	UUUUUCAAGGGGACAACUCAGA	1	12	10	experimental		mature miRNA	standard	MIMAT0029030	gga-miR-7438-5p
352	empty		1	12	11	control	control_empty
353	gga-let-7b	UGAGGUAGUAGGUUGUGUGGUU	1	12	12	experimental		mature miRNA	standard	MIMAT0001102	gga-let-7b
354	gga-miR-1550-5p	UGAUGGGGGUGUAGUGCAGCA	1	12	13	experimental		mature miRNA	standard	MIMAT0007403	gga-miR-1550-5p
355	gga-miR-1635	UGCCCAGGCUGUGCUGUGCUCUGGG	1	12	14	experimental		mature miRNA	standard	MIMAT0007508	gga-miR-1635
356	gga-miR-1721	AGAGAUGAUGUUGGUCUGAUG	1	12	15	experimental		mature miRNA	standard	MIMAT0007619	gga-miR-1721
357	gga-miR-1807	GCAGAAUGAGGCUAGAGCUGAG	1	12	16	experimental		mature miRNA	standard	MIMAT0007725	gga-miR-1807
358	gga-miR-301a-5p	UCUGACAAUGUUGCACUACU	1	12	17	experimental		mature miRNA	standard	MIMAT0026531	gga-miR-301a-5p
359	gga-miR-6547-5p	GUGGGAUGUGGGGACGGGGUGA	1	12	18	experimental		mature miRNA	standard	MIMAT0025597	gga-miR-6547-5p
360	gga-miR-6616-5p	GCUCUGUGAUGGCUAGCUGAGA	1	12	19	experimental		mature miRNA	standard	MIMAT0025712	gga-miR-6616-5p
361	gga-miR-7438-5p	UUUUUCAAGGGGACAACUCAGA	1	12	20	experimental		mature miRNA	standard	MIMAT0029030	gga-miR-7438-5p
362	empty		1	12	21	control	control_empty
363	gga-let-7b	UGAGGUAGUAGGUUGUGUGGUU	1	12	22	experimental		mature miRNA	standard	MIMAT0001102	gga-let-7b
364	gga-miR-1550-5p	UGAUGGGGGUGUAGUGCAGCA	1	12	23	experimental		mature miRNA	standard	MIMAT0007403	gga-miR-1550-5p
365	gga-miR-1635	UGCCCAGGCUGUGCUGUGCUCUGGG	1	12	24	experimental		mature miRNA	standard	MIMAT0007508	gga-miR-1635
366	gga-miR-1721	AGAGAUGAUGUUGGUCUGAUG	1	12	25	experimental		mature miRNA	standard	MIMAT0007619	gga-miR-1721
367	gga-miR-1807	GCAGAAUGAGGCUAGAGCUGAG	1	12	26	experimental		mature miRNA	standard	MIMAT0007725	gga-miR-1807
368	gga-miR-301a-5p	UCUGACAAUGUUGCACUACU	1	12	27	experimental		mature miRNA	standard	MIMAT0026531	gga-miR-301a-5p
369	gga-miR-6547-5p	GUGGGAUGUGGGGACGGGGUGA	1	12	28	experimental		mature miRNA	standard	MIMAT0025597	gga-miR-6547-5p
370	gga-miR-6616-5p	GCUCUGUGAUGGCUAGCUGAGA	1	12	29	experimental		mature miRNA	standard	MIMAT0025712	gga-miR-6616-5p
371	gga-miR-7438-5p	UUUUUCAAGGGGACAACUCAGA	1	12	30	experimental		mature miRNA	standard	MIMAT0029030	gga-miR-7438-5p
372	empty		1	12	31	control	control_empty
373	empty		1	13	1	control	control_empty
374	gga-let-7c-3p	CUGUACAACCUUCUAGCUUUCC	1	13	2	experimental		mature miRNA	standard	MIMAT0026492	gga-let-7c-3p
375	gga-miR-1551-3p	UGAGUUUGUGUUGCUGCUUUCU	1	13	3	experimental		mature miRNA	standard	MIMAT0007406	gga-miR-1551-3p
376	gga-miR-1636	UGCAGGUGAUGGCGGGGCUG	1	13	4	experimental		mature miRNA	standard	MIMAT0007509	gga-miR-1636
377	gga-miR-1722-3p	UAGAGCAUCACCAAGGGGCAAG	1	13	5	experimental		mature miRNA	standard	MIMAT0007621	gga-miR-1722-3p
378	gga-miR-1808	UUUGUUGGGAAUGAAUACAUAUU	1	13	6	experimental		mature miRNA	standard	MIMAT0007726	gga-miR-1808
379	gga-miR-301b-3p	CAGUGCAAUAGUAUUGUCAAAGCAU	1	13	7	experimental		mature miRNA	standard	MIMAT0007742	gga-miR-301b-3p
380	gga-miR-6548-3p	AGAGGUGCCCCGCUGUUGCUGU	1	13	8	experimental		mature miRNA	standard	MIMAT0025602	gga-miR-6548-3p
381	gga-miR-6617-3p	UGUUUCAGAGCAGGUCAGUCGUU	1	13	9	experimental		mature miRNA	standard	MIMAT0025713	gga-miR-6617-3p
382	gga-miR-7439-3p	UUCUCCAGUAGUUCCUGAGUGCU	1	13	10	experimental		mature miRNA	standard	MIMAT0029033	gga-miR-7439-3p
383	empty		1	13	11	control	control_empty
384	gga-let-7c-3p	CUGUACAACCUUCUAGCUUUCC	1	13	12	experimental		mature miRNA	standard	MIMAT0026492	gga-let-7c-3p
385	gga-miR-1551-3p	UGAGUUUGUGUUGCUGCUUUCU	1	13	13	experimental		mature miRNA	standard	MIMAT0007406	gga-miR-1551-3p
386	gga-miR-1636	UGCAGGUGAUGGCGGGGCUG	1	13	14	experimental		mature miRNA	standard	MIMAT0007509	gga-miR-1636
387	gga-miR-1722-3p	UAGAGCAUCACCAAGGGGCAAG	1	13	15	experimental		mature miRNA	standard	MIMAT0007621	gga-miR-1722-3p
388	gga-miR-1808	UUUGUUGGGAAUGAAUACAUAUU	1	13	16	experimental		mature miRNA	standard	MIMAT0007726	gga-miR-1808
389	gga-miR-301b-3p	CAGUGCAAUAGUAUUGUCAAAGCAU	1	13	17	experimental		mature miRNA	standard	MIMAT0007742	gga-miR-301b-3p
390	gga-miR-6548-3p	AGAGGUGCCCCGCUGUUGCUGU	1	13	18	experimental		mature miRNA	standard	MIMAT0025602	gga-miR-6548-3p
391	gga-miR-6617-3p	UGUUUCAGAGCAGGUCAGUCGUU	1	13	19	experimental		mature miRNA	standard	MIMAT0025713	gga-miR-6617-3p
392	gga-miR-7439-3p	UUCUCCAGUAGUUCCUGAGUGCU	1	13	20	experimental		mature miRNA	standard	MIMAT0029033	gga-miR-7439-3p
393	empty		1	13	21	control	control_empty
394	gga-let-7c-3p	CUGUACAACCUUCUAGCUUUCC	1	13	22	experimental		mature miRNA	standard	MIMAT0026492	gga-let-7c-3p
395	gga-miR-1551-3p	UGAGUUUGUGUUGCUGCUUUCU	1	13	23	experimental		mature miRNA	standard	MIMAT0007406	gga-miR-1551-3p
396	gga-miR-1636	UGCAGGUGAUGGCGGGGCUG	1	13	24	experimental		mature miRNA	standard	MIMAT0007509	gga-miR-1636
397	gga-miR-1722-3p	UAGAGCAUCACCAAGGGGCAAG	1	13	25	experimental		mature miRNA	standard	MIMAT0007621	gga-miR-1722-3p
398	gga-miR-1808	UUUGUUGGGAAUGAAUACAUAUU	1	13	26	experimental		mature miRNA	standard	MIMAT0007726	gga-miR-1808
399	gga-miR-301b-3p	CAGUGCAAUAGUAUUGUCAAAGCAU	1	13	27	experimental		mature miRNA	standard	MIMAT0007742	gga-miR-301b-3p
400	gga-miR-6548-3p	AGAGGUGCCCCGCUGUUGCUGU	1	13	28	experimental		mature miRNA	standard	MIMAT0025602	gga-miR-6548-3p
401	gga-miR-6617-3p	UGUUUCAGAGCAGGUCAGUCGUU	1	13	29	experimental		mature miRNA	standard	MIMAT0025713	gga-miR-6617-3p
402	gga-miR-7439-3p	UUCUCCAGUAGUUCCUGAGUGCU	1	13	30	experimental		mature miRNA	standard	MIMAT0029033	gga-miR-7439-3p
403	empty		1	13	31	control	control_empty
404	empty		1	14	1	control	control_empty
405	gga-let-7c-5p	UGAGGUAGUAGGUUGUAUGGUU	1	14	2	experimental		mature miRNA	standard	MIMAT0001104	gga-let-7c-5p
406	gga-miR-1551-5p	CUAGCAGCAAAAAGAACUUCAGA	1	14	3	experimental		mature miRNA	standard	MIMAT0007405	gga-miR-1551-5p
407	gga-miR-1637	UGAUAGCUGCUGUGGCACGGA	1	14	4	experimental		mature miRNA	standard	MIMAT0007510	gga-miR-1637
408	gga-miR-1722-5p	UGUCACCCUAAGACUGCUCUAAU	1	14	5	experimental		mature miRNA	standard	MIMAT0007620	gga-miR-1722-5p
409	gga-miR-1809	ACGUGGGAAGUUUGGCAGAGCAUG	1	14	6	experimental		mature miRNA	standard	MIMAT0007727	gga-miR-1809
410	gga-miR-301b-5p	GCUCUGACUUUAUUGCACUACU	1	14	7	experimental		mature miRNA	standard	MIMAT0007741	gga-miR-301b-5p
411	gga-miR-6548-5p	AACAACAGCUGCGUGCCAUGCC	1	14	8	experimental		mature miRNA	standard	MIMAT0025601	gga-miR-6548-5p
412	gga-miR-6618-5p	AGAGGCUGCUGUUCCUCUCCUG	1	14	9	experimental		mature miRNA	standard	MIMAT0025714	gga-miR-6618-5p
413	gga-miR-7439-5p	UGACUUGGGAACAUGGGAAGAGG	1	14	10	experimental		mature miRNA	standard	MIMAT0029032	gga-miR-7439-5p
414	empty		1	14	11	control	control_empty
415	gga-let-7c-5p	UGAGGUAGUAGGUUGUAUGGUU	1	14	12	experimental		mature miRNA	standard	MIMAT0001104	gga-let-7c-5p
416	gga-miR-1551-5p	CUAGCAGCAAAAAGAACUUCAGA	1	14	13	experimental		mature miRNA	standard	MIMAT0007405	gga-miR-1551-5p
417	gga-miR-1637	UGAUAGCUGCUGUGGCACGGA	1	14	14	experimental		mature miRNA	standard	MIMAT0007510	gga-miR-1637
418	gga-miR-1722-5p	UGUCACCCUAAGACUGCUCUAAU	1	14	15	experimental		mature miRNA	standard	MIMAT0007620	gga-miR-1722-5p
419	gga-miR-1809	ACGUGGGAAGUUUGGCAGAGCAUG	1	14	16	experimental		mature miRNA	standard	MIMAT0007727	gga-miR-1809
420	gga-miR-301b-5p	GCUCUGACUUUAUUGCACUACU	1	14	17	experimental		mature miRNA	standard	MIMAT0007741	gga-miR-301b-5p
421	gga-miR-6548-5p	AACAACAGCUGCGUGCCAUGCC	1	14	18	experimental		mature miRNA	standard	MIMAT0025601	gga-miR-6548-5p
422	gga-miR-6618-5p	AGAGGCUGCUGUUCCUCUCCUG	1	14	19	experimental		mature miRNA	standard	MIMAT0025714	gga-miR-6618-5p
423	gga-miR-7439-5p	UGACUUGGGAACAUGGGAAGAGG	1	14	20	experimental		mature miRNA	standard	MIMAT0029032	gga-miR-7439-5p
424	empty		1	14	21	control	control_empty
425	gga-let-7c-5p	UGAGGUAGUAGGUUGUAUGGUU	1	14	22	experimental		mature miRNA	standard	MIMAT0001104	gga-let-7c-5p
426	gga-miR-1551-5p	CUAGCAGCAAAAAGAACUUCAGA	1	14	23	experimental		mature miRNA	standard	MIMAT0007405	gga-miR-1551-5p
427	gga-miR-1637	UGAUAGCUGCUGUGGCACGGA	1	14	24	experimental		mature miRNA	standard	MIMAT0007510	gga-miR-1637
428	gga-miR-1722-5p	UGUCACCCUAAGACUGCUCUAAU	1	14	25	experimental		mature miRNA	standard	MIMAT0007620	gga-miR-1722-5p
429	gga-miR-1809	ACGUGGGAAGUUUGGCAGAGCAUG	1	14	26	experimental		mature miRNA	standard	MIMAT0007727	gga-miR-1809
430	gga-miR-301b-5p	GCUCUGACUUUAUUGCACUACU	1	14	27	experimental		mature miRNA	standard	MIMAT0007741	gga-miR-301b-5p
431	gga-miR-6548-5p	AACAACAGCUGCGUGCCAUGCC	1	14	28	experimental		mature miRNA	standard	MIMAT0025601	gga-miR-6548-5p
432	gga-miR-6618-5p	AGAGGCUGCUGUUCCUCUCCUG	1	14	29	experimental		mature miRNA	standard	MIMAT0025714	gga-miR-6618-5p
433	gga-miR-7439-5p	UGACUUGGGAACAUGGGAAGAGG	1	14	30	experimental		mature miRNA	standard	MIMAT0029032	gga-miR-7439-5p
434	empty		1	14	31	control	control_empty
435	gga-5S-b1	GCCUACGGCCAUACCACCCUGG	1	15	1	control	control_biosequence	LC Internal Use	control
436	gga-let-7d	AGAGGUAGUGGGUUGCAUAGU	1	15	2	experimental		mature miRNA	standard	MIMAT0001161	gga-let-7d
437	gga-miR-1552-3p	CUAGCUGCUCUGCACUGACUG	1	15	3	experimental		mature miRNA	standard	MIMAT0007408	gga-miR-1552-3p
438	gga-miR-1638	GUAGUUUGUGUUGUUUGUUU	1	15	4	experimental		mature miRNA	standard	MIMAT0007511	gga-miR-1638
439	gga-miR-1723	UGGGAGCGGAAUGUGCAGCCUCA	1	15	5	experimental		mature miRNA	standard	MIMAT0007622	gga-miR-1723
440	gga-miR-1811	UAUUGCAGCGCUGGGUGCAU	1	15	6	experimental		mature miRNA	standard	MIMAT0007729	gga-miR-1811
441	gga-miR-302a	AAGUGCUUCCAUGUUUUAGUGA	1	15	7	experimental		mature miRNA	standard	MIMAT0001143	gga-miR-302a
442	gga-miR-6549-3p	ACAGCUGUAAGCAGAAGGCACCC	1	15	8	experimental		mature miRNA	standard	MIMAT0025604	gga-miR-6549-3p
443	gga-miR-6619-5p	AGGAGAAGUGACGGAGCAGUGC	1	15	9	experimental		mature miRNA	standard	MIMAT0025715	gga-miR-6619-5p
444	gga-miR-7440-3p	UUUGGUGUAGGCCAGGACAGC	1	15	10	experimental		mature miRNA	standard	MIMAT0029035	gga-miR-7440-3p
445	gga-5S-b1	GCCUACGGCCAUACCACCCUGG	1	15	11	control	control_biosequence	LC Internal Use	control
446	gga-let-7d	AGAGGUAGUGGGUUGCAUAGU	1	15	12	experimental		mature miRNA	standard	MIMAT0001161	gga-let-7d
447	gga-miR-1552-3p	CUAGCUGCUCUGCACUGACUG	1	15	13	experimental		mature miRNA	standard	MIMAT0007408	gga-miR-1552-3p
448	gga-miR-1638	GUAGUUUGUGUUGUUUGUUU	1	15	14	experimental		mature miRNA	standard	MIMAT0007511	gga-miR-1638
449	gga-miR-1723	UGGGAGCGGAAUGUGCAGCCUCA	1	15	15	experimental		mature miRNA	standard	MIMAT0007622	gga-miR-1723
450	gga-miR-1811	UAUUGCAGCGCUGGGUGCAU	1	15	16	experimental		mature miRNA	standard	MIMAT0007729	gga-miR-1811
451	gga-miR-302a	AAGUGCUUCCAUGUUUUAGUGA	1	15	17	experimental		mature miRNA	standard	MIMAT0001143	gga-miR-302a
452	gga-miR-6549-3p	ACAGCUGUAAGCAGAAGGCACCC	1	15	18	experimental		mature miRNA	standard	MIMAT0025604	gga-miR-6549-3p
453	gga-miR-6619-5p	AGGAGAAGUGACGGAGCAGUGC	1	15	19	experimental		mature miRNA	standard	MIMAT0025715	gga-miR-6619-5p
454	gga-miR-7440-3p	UUUGGUGUAGGCCAGGACAGC	1	15	20	experimental		mature miRNA	standard	MIMAT0029035	gga-miR-7440-3p
455	gga-5S-b1	GCCUACGGCCAUACCACCCUGG	1	15	21	control	control_biosequence	LC Internal Use	control
456	gga-let-7d	AGAGGUAGUGGGUUGCAUAGU	1	15	22	experimental		mature miRNA	standard	MIMAT0001161	gga-let-7d
457	gga-miR-1552-3p	CUAGCUGCUCUGCACUGACUG	1	15	23	experimental		mature miRNA	standard	MIMAT0007408	gga-miR-1552-3p
458	gga-miR-1638	GUAGUUUGUGUUGUUUGUUU	1	15	24	experimental		mature miRNA	standard	MIMAT0007511	gga-miR-1638
459	gga-miR-1723	UGGGAGCGGAAUGUGCAGCCUCA	1	15	25	experimental		mature miRNA	standard	MIMAT0007622	gga-miR-1723
460	gga-miR-1811	UAUUGCAGCGCUGGGUGCAU	1	15	26	experimental		mature miRNA	standard	MIMAT0007729	gga-miR-1811
461	gga-miR-302a	AAGUGCUUCCAUGUUUUAGUGA	1	15	27	experimental		mature miRNA	standard	MIMAT0001143	gga-miR-302a
462	gga-miR-6549-3p	ACAGCUGUAAGCAGAAGGCACCC	1	15	28	experimental		mature miRNA	standard	MIMAT0025604	gga-miR-6549-3p
463	gga-miR-6619-5p	AGGAGAAGUGACGGAGCAGUGC	1	15	29	experimental		mature miRNA	standard	MIMAT0025715	gga-miR-6619-5p
464	gga-miR-7440-3p	UUUGGUGUAGGCCAGGACAGC	1	15	30	experimental		mature miRNA	standard	MIMAT0029035	gga-miR-7440-3p
465	gga-5S-b1	GCCUACGGCCAUACCACCCUGG	1	15	31	control	control_biosequence	LC Internal Use	control
466	gga-5S-b2	GGAAACGCCCGAUCUCGUCUGA	1	16	1	control	control_biosequence	LC Internal Use	control
467	gga-let-7f-3p	CUAUACAAUCUAUUGCCUUCCC	1	16	2	experimental		mature miRNA	standard	MIMAT0026528	gga-let-7f-3p
468	gga-miR-1552-5p	UUAGUGCGCGGUAAGCUAGGGUG	1	16	3	experimental		mature miRNA	standard	MIMAT0007407	gga-miR-1552-5p
469	gga-miR-1639	UUGUGCAAGGUACGUUGGGUU	1	16	4	experimental		mature miRNA	standard	MIMAT0007514	gga-miR-1639
470	gga-miR-1724	UGCUGAGCGUUGGCUGCGCUGCG	1	16	5	experimental		mature miRNA	standard	MIMAT0007623	gga-miR-1724
471	gga-miR-1812-3p	CAUACUAUACAGUAUAUAUCUA	1	16	6	experimental		mature miRNA	standard	MIMAT0026785	gga-miR-1812-3p
472	gga-miR-302b-3p	UAAGUGCUUCCAUGUUUUAGUAG	1	16	7	experimental		mature miRNA	standard	MIMAT0003357	gga-miR-302b-3p
473	gga-miR-6549-5p	AGCCUUCUGUUGUGCAUCUGAGA	1	16	8	experimental		mature miRNA	standard	MIMAT0025603	gga-miR-6549-5p
474	gga-miR-6620-5p	AGAGAUGGAAGCGCUGCGCACGG	1	16	9	experimental		mature miRNA	standard	MIMAT0025716	gga-miR-6620-5p
475	gga-miR-7440-5p	UGUUUGAGUGCACCUGGGU	1	16	10	experimental		mature miRNA	standard	MIMAT0029034	gga-miR-7440-5p
476	gga-5S-b2	GGAAACGCCCGAUCUCGUCUGA	1	16	11	control	control_biosequence	LC Internal Use	control
477	gga-let-7f-3p	CUAUACAAUCUAUUGCCUUCCC	1	16	12	experimental		mature miRNA	standard	MIMAT0026528	gga-let-7f-3p
478	gga-miR-1552-5p	UUAGUGCGCGGUAAGCUAGGGUG	1	16	13	experimental		mature miRNA	standard	MIMAT0007407	gga-miR-1552-5p
479	gga-miR-1639	UUGUGCAAGGUACGUUGGGUU	1	16	14	experimental		mature miRNA	standard	MIMAT0007514	gga-miR-1639
480	gga-miR-1724	UGCUGAGCGUUGGCUGCGCUGCG	1	16	15	experimental		mature miRNA	standard	MIMAT0007623	gga-miR-1724
481	gga-miR-1812-3p	CAUACUAUACAGUAUAUAUCUA	1	16	16	experimental		mature miRNA	standard	MIMAT0026785	gga-miR-1812-3p
482	gga-miR-302b-3p	UAAGUGCUUCCAUGUUUUAGUAG	1	16	17	experimental		mature miRNA	standard	MIMAT0003357	gga-miR-302b-3p
483	gga-miR-6549-5p	AGCCUUCUGUUGUGCAUCUGAGA	1	16	18	experimental		mature miRNA	standard	MIMAT0025603	gga-miR-6549-5p
484	gga-miR-6620-5p	AGAGAUGGAAGCGCUGCGCACGG	1	16	19	experimental		mature miRNA	standard	MIMAT0025716	gga-miR-6620-5p
485	gga-miR-7440-5p	UGUUUGAGUGCACCUGGGU	1	16	20	experimental		mature miRNA	standard	MIMAT0029034	gga-miR-7440-5p
486	gga-5S-b2	GGAAACGCCCGAUCUCGUCUGA	1	16	21	control	control_biosequence	LC Internal Use	control
487	gga-let-7f-3p	CUAUACAAUCUAUUGCCUUCCC	1	16	22	experimental		mature miRNA	standard	MIMAT0026528	gga-let-7f-3p
488	gga-miR-1552-5p	UUAGUGCGCGGUAAGCUAGGGUG	1	16	23	experimental		mature miRNA	standard	MIMAT0007407	gga-miR-1552-5p
489	gga-miR-1639	UUGUGCAAGGUACGUUGGGUU	1	16	24	experimental		mature miRNA	standard	MIMAT0007514	gga-miR-1639
490	gga-miR-1724	UGCUGAGCGUUGGCUGCGCUGCG	1	16	25	experimental		mature miRNA	standard	MIMAT0007623	gga-miR-1724
491	gga-miR-1812-3p	CAUACUAUACAGUAUAUAUCUA	1	16	26	experimental		mature miRNA	standard	MIMAT0026785	gga-miR-1812-3p
492	gga-miR-302b-3p	UAAGUGCUUCCAUGUUUUAGUAG	1	16	27	experimental		mature miRNA	standard	MIMAT0003357	gga-miR-302b-3p
493	gga-miR-6549-5p	AGCCUUCUGUUGUGCAUCUGAGA	1	16	28	experimental		mature miRNA	standard	MIMAT0025603	gga-miR-6549-5p
494	gga-miR-6620-5p	AGAGAUGGAAGCGCUGCGCACGG	1	16	29	experimental		mature miRNA	standard	MIMAT0025716	gga-miR-6620-5p
495	gga-miR-7440-5p	UGUUUGAGUGCACCUGGGU	1	16	30	experimental		mature miRNA	standard	MIMAT0029034	gga-miR-7440-5p
496	gga-5S-b2	GGAAACGCCCGAUCUCGUCUGA	1	16	31	control	control_biosequence	LC Internal Use	control
497	gga-5S-b3	GAUCUCGGAAGCUAAGCAGGGU	1	17	1	control	control_biosequence	LC Internal Use	control
498	gga-let-7f-5p	UGAGGUAGUAGAUUGUAUAGUU	1	17	2	experimental		mature miRNA	standard	MIMAT0001162	gga-let-7f-5p
499	gga-miR-1553-3p	UGUGGUGGGAGGACAGUGAUGU	1	17	3	experimental		mature miRNA	standard	MIMAT0007410	gga-miR-1553-3p
500	gga-miR-1640	UUGUCACUGCAGGGCCCCGCGGCC	1	17	4	experimental		mature miRNA	standard	MIMAT0007515	gga-miR-1640
501	gga-miR-1725	UAUGAUAUAGUUAGAGCUGCU	1	17	5	experimental		mature miRNA	standard	MIMAT0007624	gga-miR-1725
502	gga-miR-1812-5p	AUAUAUACUGUAUACUGUGUCA	1	17	6	experimental		mature miRNA	standard	MIMAT0007730	gga-miR-1812-5p
503	gga-miR-302b-5p	ACUUUAACAUGGAGGUGCUUUCU	1	17	7	experimental		mature miRNA	standard	MIMAT0003356	gga-miR-302b-5p
504	gga-miR-6550-3p	GCUCCACCCUCGGCUGCUUUGA	1	17	8	experimental		mature miRNA	standard	MIMAT0025606	gga-miR-6550-3p
505	gga-miR-6621-5p	ACAGGGAUUACAGGGCUCUGA	1	17	9	experimental		mature miRNA	standard	MIMAT0025718	gga-miR-6621-5p
506	gga-miR-7441-3p	AUGUUGGGAUCCUCUUCUGCA	1	17	10	experimental		mature miRNA	standard	MIMAT0029037	gga-miR-7441-3p
507	gga-5S-b3	GAUCUCGGAAGCUAAGCAGGGU	1	17	11	control	control_biosequence	LC Internal Use	control
508	gga-let-7f-5p	UGAGGUAGUAGAUUGUAUAGUU	1	17	12	experimental		mature miRNA	standard	MIMAT0001162	gga-let-7f-5p
509	gga-miR-1553-3p	UGUGGUGGGAGGACAGUGAUGU	1	17	13	experimental		mature miRNA	standard	MIMAT0007410	gga-miR-1553-3p
510	gga-miR-1640	UUGUCACUGCAGGGCCCCGCGGCC	1	17	14	experimental		mature miRNA	standard	MIMAT0007515	gga-miR-1640
511	gga-miR-1725	UAUGAUAUAGUUAGAGCUGCU	1	17	15	experimental		mature miRNA	standard	MIMAT0007624	gga-miR-1725
512	gga-miR-1812-5p	AUAUAUACUGUAUACUGUGUCA	1	17	16	experimental		mature miRNA	standard	MIMAT0007730	gga-miR-1812-5p
513	gga-miR-302b-5p	ACUUUAACAUGGAGGUGCUUUCU	1	17	17	experimental		mature miRNA	standard	MIMAT0003356	gga-miR-302b-5p
514	gga-miR-6550-3p	GCUCCACCCUCGGCUGCUUUGA	1	17	18	experimental		mature miRNA	standard	MIMAT0025606	gga-miR-6550-3p
515	gga-miR-6621-5p	ACAGGGAUUACAGGGCUCUGA	1	17	19	experimental		mature miRNA	standard	MIMAT0025718	gga-miR-6621-5p
516	gga-miR-7441-3p	AUGUUGGGAUCCUCUUCUGCA	1	17	20	experimental		mature miRNA	standard	MIMAT0029037	gga-miR-7441-3p
517	gga-5S-b3	GAUCUCGGAAGCUAAGCAGGGU	1	17	21	control	control_biosequence	LC Internal Use	control
518	gga-let-7f-5p	UGAGGUAGUAGAUUGUAUAGUU	1	17	22	experimental		mature miRNA	standard	MIMAT0001162	gga-let-7f-5p
519	gga-miR-1553-3p	UGUGGUGGGAGGACAGUGAUGU	1	17	23	experimental		mature miRNA	standard	MIMAT0007410	gga-miR-1553-3p
520	gga-miR-1640	UUGUCACUGCAGGGCCCCGCGGCC	1	17	24	experimental		mature miRNA	standard	MIMAT0007515	gga-miR-1640
521	gga-miR-1725	UAUGAUAUAGUUAGAGCUGCU	1	17	25	experimental		mature miRNA	standard	MIMAT0007624	gga-miR-1725
522	gga-miR-1812-5p	AUAUAUACUGUAUACUGUGUCA	1	17	26	experimental		mature miRNA	standard	MIMAT0007730	gga-miR-1812-5p
523	gga-miR-302b-5p	ACUUUAACAUGGAGGUGCUUUCU	1	17	27	experimental		mature miRNA	standard	MIMAT0003356	gga-miR-302b-5p
524	gga-miR-6550-3p	GCUCCACCCUCGGCUGCUUUGA	1	17	28	experimental		mature miRNA	standard	MIMAT0025606	gga-miR-6550-3p
525	gga-miR-6621-5p	ACAGGGAUUACAGGGCUCUGA	1	17	29	experimental		mature miRNA	standard	MIMAT0025718	gga-miR-6621-5p
526	gga-miR-7441-3p	AUGUUGGGAUCCUCUUCUGCA	1	17	30	experimental		mature miRNA	standard	MIMAT0029037	gga-miR-7441-3p
527	gga-5S-b3	GAUCUCGGAAGCUAAGCAGGGU	1	17	31	control	control_biosequence	LC Internal Use	control
528	gga-5S-b4	GUCGGGCUCGGUUAGUACUUGG	1	18	1	control	control_biosequence	LC Internal Use	control
529	gga-let-7g-3p	CUGUACAGGCCACUGCCUUGCC	1	18	2	experimental		mature miRNA	standard	MIMAT0026527	gga-let-7g-3p
530	gga-miR-1553-5p	AGUCCUGUCCUGUCUACCUACUGU	1	18	3	experimental		mature miRNA	standard	MIMAT0007409	gga-miR-1553-5p
531	gga-miR-1641	UGAGGAUUAAUGACUGUCUGGG	1	18	4	experimental		mature miRNA	standard	MIMAT0007516	gga-miR-1641
532	gga-miR-1726	AAGCUUGUUGGGUUUGGUUUGU	1	18	5	experimental		mature miRNA	standard	MIMAT0007625	gga-miR-1726
533	gga-miR-1813	UUCUGUGGCUGCAAGGAGAG	1	18	6	experimental		mature miRNA	standard	MIMAT0007600	gga-miR-1813
534	gga-miR-302c-3p	UAAGUGCUUCCAUGUUUCAGUGG	1	18	7	experimental		mature miRNA	standard	MIMAT0003359	gga-miR-302c-3p
535	gga-miR-6550-5p	AAAGCAGCCCAGGAAGCGCU	1	18	8	experimental		mature miRNA	standard	MIMAT0025605	gga-miR-6550-5p
536	gga-miR-6622-3p	UGUGGGGACAUUUCUGUGGCAUU	1	18	9	experimental		mature miRNA	standard	MIMAT0025825	gga-miR-6622-3p
537	gga-miR-7441-5p	CUGAGGAGGGUUUGUAACAUGG	1	18	10	experimental		mature miRNA	standard	MIMAT0029036	gga-miR-7441-5p
538	gga-5S-b4	GUCGGGCUCGGUUAGUACUUGG	1	18	11	control	control_biosequence	LC Internal Use	control
539	gga-let-7g-3p	CUGUACAGGCCACUGCCUUGCC	1	18	12	experimental		mature miRNA	standard	MIMAT0026527	gga-let-7g-3p
540	gga-miR-1553-5p	AGUCCUGUCCUGUCUACCUACUGU	1	18	13	experimental		mature miRNA	standard	MIMAT0007409	gga-miR-1553-5p
541	gga-miR-1641	UGAGGAUUAAUGACUGUCUGGG	1	18	14	experimental		mature miRNA	standard	MIMAT0007516	gga-miR-1641
542	gga-miR-1726	AAGCUUGUUGGGUUUGGUUUGU	1	18	15	experimental		mature miRNA	standard	MIMAT0007625	gga-miR-1726
543	gga-miR-1813	UUCUGUGGCUGCAAGGAGAG	1	18	16	experimental		mature miRNA	standard	MIMAT0007600	gga-miR-1813
544	gga-miR-302c-3p	UAAGUGCUUCCAUGUUUCAGUGG	1	18	17	experimental		mature miRNA	standard	MIMAT0003359	gga-miR-302c-3p
545	gga-miR-6550-5p	AAAGCAGCCCAGGAAGCGCU	1	18	18	experimental		mature miRNA	standard	MIMAT0025605	gga-miR-6550-5p
546	gga-miR-6622-3p	UGUGGGGACAUUUCUGUGGCAUU	1	18	19	experimental		mature miRNA	standard	MIMAT0025825	gga-miR-6622-3p
547	gga-miR-7441-5p	CUGAGGAGGGUUUGUAACAUGG	1	18	20	experimental		mature miRNA	standard	MIMAT0029036	gga-miR-7441-5p
548	gga-5S-b4	GUCGGGCUCGGUUAGUACUUGG	1	18	21	control	control_biosequence	LC Internal Use	control
549	gga-let-7g-3p	CUGUACAGGCCACUGCCUUGCC	1	18	22	experimental		mature miRNA	standard	MIMAT0026527	gga-let-7g-3p
550	gga-miR-1553-5p	AGUCCUGUCCUGUCUACCUACUGU	1	18	23	experimental		mature miRNA	standard	MIMAT0007409	gga-miR-1553-5p
551	gga-miR-1641	UGAGGAUUAAUGACUGUCUGGG	1	18	24	experimental		mature miRNA	standard	MIMAT0007516	gga-miR-1641
552	gga-miR-1726	AAGCUUGUUGGGUUUGGUUUGU	1	18	25	experimental		mature miRNA	standard	MIMAT0007625	gga-miR-1726
553	gga-miR-1813	UUCUGUGGCUGCAAGGAGAG	1	18	26	experimental		mature miRNA	standard	MIMAT0007600	gga-miR-1813
554	gga-miR-302c-3p	UAAGUGCUUCCAUGUUUCAGUGG	1	18	27	experimental		mature miRNA	standard	MIMAT0003359	gga-miR-302c-3p
555	gga-miR-6550-5p	AAAGCAGCCCAGGAAGCGCU	1	18	28	experimental		mature miRNA	standard	MIMAT0025605	gga-miR-6550-5p
556	gga-miR-6622-3p	UGUGGGGACAUUUCUGUGGCAUU	1	18	29	experimental		mature miRNA	standard	MIMAT0025825	gga-miR-6622-3p
557	gga-miR-7441-5p	CUGAGGAGGGUUUGUAACAUGG	1	18	30	experimental		mature miRNA	standard	MIMAT0029036	gga-miR-7441-5p
558	gga-5S-b4	GUCGGGCUCGGUUAGUACUUGG	1	18	31	control	control_biosequence	LC Internal Use	control
559	gga-5S-b5	GGAUGGGAGACUGCCUGGGAAU	1	19	1	control	control_biosequence	LC Internal Use	control
560	gga-let-7g-5p	UGAGGUAGUAGUUUGUACAGU	1	19	2	experimental		mature miRNA	standard	MIMAT0001160	gga-let-7g-5p
561	gga-miR-1554	GCAGGUGAUGAGGCUUUGCUG	1	19	3	experimental		mature miRNA	standard	MIMAT0007411	gga-miR-1554
562	gga-miR-1642	UGAGAGGCUGUCAGUUUGUGGGG	1	19	4	experimental		mature miRNA	standard	MIMAT0007517	gga-miR-1642
563	gga-miR-1727	AAGCUGCUCUAAUGAACUGAAGG	1	19	5	experimental		mature miRNA	standard	MIMAT0007626	gga-miR-1727
564	gga-miR-1814	AGGUUGUUUGGUUUUGUUUU	1	19	6	experimental		mature miRNA	standard	MIMAT0007513	gga-miR-1814
565	gga-miR-302c-5p	UUUAACAUGGAGGUACCUGCUG	1	19	7	experimental		mature miRNA	standard	MIMAT0003358	gga-miR-302c-5p
566	gga-miR-6551-3p	GGGCUGUGAGAGAUGUUCCCUU	1	19	8	experimental		mature miRNA	standard	MIMAT0025610	gga-miR-6551-3p
567	gga-miR-6623-3p	ACAGCUGGAGACCAUCUUUUCA	1	19	9	experimental		mature miRNA	standard	MIMAT0025719	gga-miR-6623-3p
568	gga-miR-7442-3p	UCUGCUUCCUCCUCCUGCAGC	1	19	10	experimental		mature miRNA	standard	MIMAT0029039	gga-miR-7442-3p
569	gga-5S-b5	GGAUGGGAGACUGCCUGGGAAU	1	19	11	control	control_biosequence	LC Internal Use	control
570	gga-let-7g-5p	UGAGGUAGUAGUUUGUACAGU	1	19	12	experimental		mature miRNA	standard	MIMAT0001160	gga-let-7g-5p
571	gga-miR-1554	GCAGGUGAUGAGGCUUUGCUG	1	19	13	experimental		mature miRNA	standard	MIMAT0007411	gga-miR-1554
572	gga-miR-1642	UGAGAGGCUGUCAGUUUGUGGGG	1	19	14	experimental		mature miRNA	standard	MIMAT0007517	gga-miR-1642
573	gga-miR-1727	AAGCUGCUCUAAUGAACUGAAGG	1	19	15	experimental		mature miRNA	standard	MIMAT0007626	gga-miR-1727
574	gga-miR-1814	AGGUUGUUUGGUUUUGUUUU	1	19	16	experimental		mature miRNA	standard	MIMAT0007513	gga-miR-1814
575	gga-miR-302c-5p	UUUAACAUGGAGGUACCUGCUG	1	19	17	experimental		mature miRNA	standard	MIMAT0003358	gga-miR-302c-5p
576	gga-miR-6551-3p	GGGCUGUGAGAGAUGUUCCCUU	1	19	18	experimental		mature miRNA	standard	MIMAT0025610	gga-miR-6551-3p
577	gga-miR-6623-3p	ACAGCUGGAGACCAUCUUUUCA	1	19	19	experimental		mature miRNA	standard	MIMAT0025719	gga-miR-6623-3p
578	gga-miR-7442-3p	UCUGCUUCCUCCUCCUGCAGC	1	19	20	experimental		mature miRNA	standard	MIMAT0029039	gga-miR-7442-3p
579	gga-5S-b5	GGAUGGGAGACUGCCUGGGAAU	1	19	21	control	control_biosequence	LC Internal Use	control
580	gga-let-7g-5p	UGAGGUAGUAGUUUGUACAGU	1	19	22	experimental		mature miRNA	standard	MIMAT0001160	gga-let-7g-5p
581	gga-miR-1554	GCAGGUGAUGAGGCUUUGCUG	1	19	23	experimental		mature miRNA	standard	MIMAT0007411	gga-miR-1554
582	gga-miR-1642	UGAGAGGCUGUCAGUUUGUGGGG	1	19	24	experimental		mature miRNA	standard	MIMAT0007517	gga-miR-1642
583	gga-miR-1727	AAGCUGCUCUAAUGAACUGAAGG	1	19	25	experimental		mature miRNA	standard	MIMAT0007626	gga-miR-1727
584	gga-miR-1814	AGGUUGUUUGGUUUUGUUUU	1	19	26	experimental		mature miRNA	standard	MIMAT0007513	gga-miR-1814
585	gga-miR-302c-5p	UUUAACAUGGAGGUACCUGCUG	1	19	27	experimental		mature miRNA	standard	MIMAT0003358	gga-miR-302c-5p
586	gga-miR-6551-3p	GGGCUGUGAGAGAUGUUCCCUU	1	19	28	experimental		mature miRNA	standard	MIMAT0025610	gga-miR-6551-3p
587	gga-miR-6623-3p	ACAGCUGGAGACCAUCUUUUCA	1	19	29	experimental		mature miRNA	standard	MIMAT0025719	gga-miR-6623-3p
588	gga-miR-7442-3p	UCUGCUUCCUCCUCCUGCAGC	1	19	30	experimental		mature miRNA	standard	MIMAT0029039	gga-miR-7442-3p
589	gga-5S-b5	GGAUGGGAGACUGCCUGGGAAU	1	19	31	control	control_biosequence	LC Internal Use	control
590	gga-5S-b6	GAAUACCGAGUGUCGUAGGCGU	1	20	1	control	control_biosequence	LC Internal Use	control
591	gga-let-7i	UGAGGUAGUAGUUUGUGCUGU	1	20	2	experimental		mature miRNA	standard	MIMAT0001098	gga-let-7i
592	gga-miR-1555-3p	CAGGGUUAUUGGUUUUGUGUGA	1	20	3	experimental		mature miRNA	standard	MIMAT0007412	gga-miR-1555-3p
593	gga-miR-1643-3p	UAAAAGUGCUGCUGGUGGAAGAA	1	20	4	experimental		mature miRNA	standard	MIMAT0007519	gga-miR-1643-3p
594	gga-miR-1728-3p	AGGCUUCUGUAGAUCAGCCAGC	1	20	5	experimental		mature miRNA	standard	MIMAT0007628	gga-miR-1728-3p
595	gga-miR-1815	UAGGUUUUAUGGUUUUGUUUU	1	20	6	experimental		mature miRNA	standard	MIMAT0007512	gga-miR-1815
596	gga-miR-302d	UAAGUGCUUCCAUGUUUUAGUUG	1	20	7	experimental		mature miRNA	standard	MIMAT0003360	gga-miR-302d
597	gga-miR-6551-5p	CGGUGCAUCUCUGCAGCCCGCA	1	20	8	experimental		mature miRNA	standard	MIMAT0025609	gga-miR-6551-5p
598	gga-miR-6624-3p	UCCAGGGAAGGGCUUCUGUUU	1	20	9	experimental		mature miRNA	standard	MIMAT0025720	gga-miR-6624-3p
599	gga-miR-7442-5p	CACAGGACCAUGGGAGCGUGGC	1	20	10	experimental		mature miRNA	standard	MIMAT0029038	gga-miR-7442-5p
600	gga-5S-b6	GAAUACCGAGUGUCGUAGGCGU	1	20	11	control	control_biosequence	LC Internal Use	control
601	gga-let-7i	UGAGGUAGUAGUUUGUGCUGU	1	20	12	experimental		mature miRNA	standard	MIMAT0001098	gga-let-7i
602	gga-miR-1555-3p	CAGGGUUAUUGGUUUUGUGUGA	1	20	13	experimental		mature miRNA	standard	MIMAT0007412	gga-miR-1555-3p
603	gga-miR-1643-3p	UAAAAGUGCUGCUGGUGGAAGAA	1	20	14	experimental		mature miRNA	standard	MIMAT0007519	gga-miR-1643-3p
604	gga-miR-1728-3p	AGGCUUCUGUAGAUCAGCCAGC	1	20	15	experimental		mature miRNA	standard	MIMAT0007628	gga-miR-1728-3p
605	gga-miR-1815	UAGGUUUUAUGGUUUUGUUUU	1	20	16	experimental		mature miRNA	standard	MIMAT0007512	gga-miR-1815
606	gga-miR-302d	UAAGUGCUUCCAUGUUUUAGUUG	1	20	17	experimental		mature miRNA	standard	MIMAT0003360	gga-miR-302d
607	gga-miR-6551-5p	CGGUGCAUCUCUGCAGCCCGCA	1	20	18	experimental		mature miRNA	standard	MIMAT0025609	gga-miR-6551-5p
608	gga-miR-6624-3p	UCCAGGGAAGGGCUUCUGUUU	1	20	19	experimental		mature miRNA	standard	MIMAT0025720	gga-miR-6624-3p
609	gga-miR-7442-5p	CACAGGACCAUGGGAGCGUGGC	1	20	20	experimental		mature miRNA	standard	MIMAT0029038	gga-miR-7442-5p
610	gga-5S-b6	GAAUACCGAGUGUCGUAGGCGU	1	20	21	control	control_biosequence	LC Internal Use	control
611	gga-let-7i	UGAGGUAGUAGUUUGUGCUGU	1	20	22	experimental		mature miRNA	standard	MIMAT0001098	gga-let-7i
612	gga-miR-1555-3p	CAGGGUUAUUGGUUUUGUGUGA	1	20	23	experimental		mature miRNA	standard	MIMAT0007412	gga-miR-1555-3p
613	gga-miR-1643-3p	UAAAAGUGCUGCUGGUGGAAGAA	1	20	24	experimental		mature miRNA	standard	MIMAT0007519	gga-miR-1643-3p
614	gga-miR-1728-3p	AGGCUUCUGUAGAUCAGCCAGC	1	20	25	experimental		mature miRNA	standard	MIMAT0007628	gga-miR-1728-3p
615	gga-miR-1815	UAGGUUUUAUGGUUUUGUUUU	1	20	26	experimental		mature miRNA	standard	MIMAT0007512	gga-miR-1815
616	gga-miR-302d	UAAGUGCUUCCAUGUUUUAGUUG	1	20	27	experimental		mature miRNA	standard	MIMAT0003360	gga-miR-302d
617	gga-miR-6551-5p	CGGUGCAUCUCUGCAGCCCGCA	1	20	28	experimental		mature miRNA	standard	MIMAT0025609	gga-miR-6551-5p
618	gga-miR-6624-3p	UCCAGGGAAGGGCUUCUGUUU	1	20	29	experimental		mature miRNA	standard	MIMAT0025720	gga-miR-6624-3p
619	gga-miR-7442-5p	CACAGGACCAUGGGAGCGUGGC	1	20	30	experimental		mature miRNA	standard	MIMAT0029038	gga-miR-7442-5p
620	gga-5S-b6	GAAUACCGAGUGUCGUAGGCGU	1	20	31	control	control_biosequence	LC Internal Use	control
621	empty		1	21	1	control	control_empty
622	gga-let-7j-3p	CUAUACAGUCUAUUGCCUUCCU	1	21	2	experimental		mature miRNA	standard	MIMAT0026542	gga-let-7j-3p
623	gga-miR-1555-5p	AGCAAACCCUUCACCCUGCC	1	21	3	experimental		mature miRNA	standard	MIMAT0026774	gga-miR-1555-5p
624	gga-miR-1643-5p	UCUUAUCACGAGGAGCACUUUU	1	21	4	experimental		mature miRNA	standard	MIMAT0007518	gga-miR-1643-5p
625	gga-miR-1728-5p	UGGUUGAUCCAUUGGAAGACUGA	1	21	5	experimental		mature miRNA	standard	MIMAT0007627	gga-miR-1728-5p
626	gga-miR-1816	GUAGGUUUUGUGGUUUUGUU	1	21	6	experimental		mature miRNA	standard	MIMAT0007656	gga-miR-1816
627	gga-miR-3064-3p	UUGCCACACUGCAACACUUUACA	1	21	7	experimental		mature miRNA	standard	MIMAT0025632	gga-miR-3064-3p
628	gga-miR-6552-3p	CAACAAGAAGUGGACAGACUG	1	21	8	experimental		mature miRNA	standard	MIMAT0025612	gga-miR-6552-3p
629	gga-miR-6625-5p	UGGGGGAACUGGAAGCAAGAGU	1	21	9	experimental		mature miRNA	standard	MIMAT0025721	gga-miR-6625-5p
630	gga-miR-7443-3p	UCCCUUGGGCUGCAGCACCCUCC	1	21	10	experimental		mature miRNA	standard	MIMAT0029041	gga-miR-7443-3p
631	empty		1	21	11	control	control_empty
632	gga-let-7j-3p	CUAUACAGUCUAUUGCCUUCCU	1	21	12	experimental		mature miRNA	standard	MIMAT0026542	gga-let-7j-3p
633	gga-miR-1555-5p	AGCAAACCCUUCACCCUGCC	1	21	13	experimental		mature miRNA	standard	MIMAT0026774	gga-miR-1555-5p
634	gga-miR-1643-5p	UCUUAUCACGAGGAGCACUUUU	1	21	14	experimental		mature miRNA	standard	MIMAT0007518	gga-miR-1643-5p
635	gga-miR-1728-5p	UGGUUGAUCCAUUGGAAGACUGA	1	21	15	experimental		mature miRNA	standard	MIMAT0007627	gga-miR-1728-5p
636	gga-miR-1816	GUAGGUUUUGUGGUUUUGUU	1	21	16	experimental		mature miRNA	standard	MIMAT0007656	gga-miR-1816
637	gga-miR-3064-3p	UUGCCACACUGCAACACUUUACA	1	21	17	experimental		mature miRNA	standard	MIMAT0025632	gga-miR-3064-3p
638	gga-miR-6552-3p	CAACAAGAAGUGGACAGACUG	1	21	18	experimental		mature miRNA	standard	MIMAT0025612	gga-miR-6552-3p
639	gga-miR-6625-5p	UGGGGGAACUGGAAGCAAGAGU	1	21	19	experimental		mature miRNA	standard	MIMAT0025721	gga-miR-6625-5p
640	gga-miR-7443-3p	UCCCUUGGGCUGCAGCACCCUCC	1	21	20	experimental		mature miRNA	standard	MIMAT0029041	gga-miR-7443-3p
641	empty		1	21	21	control	control_empty
642	gga-let-7j-3p	CUAUACAGUCUAUUGCCUUCCU	1	21	22	experimental		mature miRNA	standard	MIMAT0026542	gga-let-7j-3p
643	gga-miR-1555-5p	AGCAAACCCUUCACCCUGCC	1	21	23	experimental		mature miRNA	standard	MIMAT0026774	gga-miR-1555-5p
644	gga-miR-1643-5p	UCUUAUCACGAGGAGCACUUUU	1	21	24	experimental		mature miRNA	standard	MIMAT0007518	gga-miR-1643-5p
645	gga-miR-1728-5p	UGGUUGAUCCAUUGGAAGACUGA	1	21	25	experimental		mature miRNA	standard	MIMAT0007627	gga-miR-1728-5p
646	gga-miR-1816	GUAGGUUUUGUGGUUUUGUU	1	21	26	experimental		mature miRNA	standard	MIMAT0007656	gga-miR-1816
647	gga-miR-3064-3p	UUGCCACACUGCAACACUUUACA	1	21	27	experimental		mature miRNA	standard	MIMAT0025632	gga-miR-3064-3p
648	gga-miR-6552-3p	CAACAAGAAGUGGACAGACUG	1	21	28	experimental		mature miRNA	standard	MIMAT0025612	gga-miR-6552-3p
649	gga-miR-6625-5p	UGGGGGAACUGGAAGCAAGAGU	1	21	29	experimental		mature miRNA	standard	MIMAT0025721	gga-miR-6625-5p
650	gga-miR-7443-3p	UCCCUUGGGCUGCAGCACCCUCC	1	21	30	experimental		mature miRNA	standard	MIMAT0029041	gga-miR-7443-3p
651	empty		1	21	31	control	control_empty
652	empty		1	22	1	control	control_empty
653	gga-let-7k-5p	UGAGGUAGUAGAUUGAAUAGUU	1	22	2	experimental		mature miRNA	standard	MIMAT0001182	gga-let-7k-5p
654	gga-miR-1556	UGCAGGCUGGAAGUAGGAGUGU	1	22	3	experimental		mature miRNA	standard	MIMAT0007413	gga-miR-1556
655	gga-miR-1644	UCUGUUGUGCAGGGCUGUGCU	1	22	4	experimental		mature miRNA	standard	MIMAT0007520	gga-miR-1644
656	gga-miR-1729-3p	CUACUCGGUGAGUAAGGAUAGC	1	22	5	experimental		mature miRNA	standard	MIMAT0007630	gga-miR-1729-3p
657	gga-miR-181a-3p	ACCAUCGACCGUUGAUUGUACC	1	22	6	experimental		mature miRNA	standard	MIMAT0001150	gga-miR-181a-3p
658	gga-miR-3064-5p	UGGCUGUUGUGGUGUGCAAAA	1	22	7	experimental		mature miRNA	standard	MIMAT0025631	gga-miR-3064-5p
659	gga-miR-6552-5p	GUCUGUCCAGGUCUUGUUGGA	1	22	8	experimental		mature miRNA	standard	MIMAT0025611	gga-miR-6552-5p
660	gga-miR-6626-5p	AGGAGAGAGAAGGGUUGCU	1	22	9	experimental		mature miRNA	standard	MIMAT0025722	gga-miR-6626-5p
661	gga-miR-7443-5p	UGGUGGCUGCCCUCAGGGAGAGC	1	22	10	experimental		mature miRNA	standard	MIMAT0029040	gga-miR-7443-5p
662	empty		1	22	11	control	control_empty
663	gga-let-7k-5p	UGAGGUAGUAGAUUGAAUAGUU	1	22	12	experimental		mature miRNA	standard	MIMAT0001182	gga-let-7k-5p
664	gga-miR-1556	UGCAGGCUGGAAGUAGGAGUGU	1	22	13	experimental		mature miRNA	standard	MIMAT0007413	gga-miR-1556
665	gga-miR-1644	UCUGUUGUGCAGGGCUGUGCU	1	22	14	experimental		mature miRNA	standard	MIMAT0007520	gga-miR-1644
666	gga-miR-1729-3p	CUACUCGGUGAGUAAGGAUAGC	1	22	15	experimental		mature miRNA	standard	MIMAT0007630	gga-miR-1729-3p
667	gga-miR-181a-3p	ACCAUCGACCGUUGAUUGUACC	1	22	16	experimental		mature miRNA	standard	MIMAT0001150	gga-miR-181a-3p
668	gga-miR-3064-5p	UGGCUGUUGUGGUGUGCAAAA	1	22	17	experimental		mature miRNA	standard	MIMAT0025631	gga-miR-3064-5p
669	gga-miR-6552-5p	GUCUGUCCAGGUCUUGUUGGA	1	22	18	experimental		mature miRNA	standard	MIMAT0025611	gga-miR-6552-5p
670	gga-miR-6626-5p	AGGAGAGAGAAGGGUUGCU	1	22	19	experimental		mature miRNA	standard	MIMAT0025722	gga-miR-6626-5p
671	gga-miR-7443-5p	UGGUGGCUGCCCUCAGGGAGAGC	1	22	20	experimental		mature miRNA	standard	MIMAT0029040	gga-miR-7443-5p
672	empty		1	22	21	control	control_empty
673	gga-let-7k-5p	UGAGGUAGUAGAUUGAAUAGUU	1	22	22	experimental		mature miRNA	standard	MIMAT0001182	gga-let-7k-5p
674	gga-miR-1556	UGCAGGCUGGAAGUAGGAGUGU	1	22	23	experimental		mature miRNA	standard	MIMAT0007413	gga-miR-1556
675	gga-miR-1644	UCUGUUGUGCAGGGCUGUGCU	1	22	24	experimental		mature miRNA	standard	MIMAT0007520	gga-miR-1644
676	gga-miR-1729-3p	CUACUCGGUGAGUAAGGAUAGC	1	22	25	experimental		mature miRNA	standard	MIMAT0007630	gga-miR-1729-3p
677	gga-miR-181a-3p	ACCAUCGACCGUUGAUUGUACC	1	22	26	experimental		mature miRNA	standard	MIMAT0001150	gga-miR-181a-3p
678	gga-miR-3064-5p	UGGCUGUUGUGGUGUGCAAAA	1	22	27	experimental		mature miRNA	standard	MIMAT0025631	gga-miR-3064-5p
679	gga-miR-6552-5p	GUCUGUCCAGGUCUUGUUGGA	1	22	28	experimental		mature miRNA	standard	MIMAT0025611	gga-miR-6552-5p
680	gga-miR-6626-5p	AGGAGAGAGAAGGGUUGCU	1	22	29	experimental		mature miRNA	standard	MIMAT0025722	gga-miR-6626-5p
681	gga-miR-7443-5p	UGGUGGCUGCCCUCAGGGAGAGC	1	22	30	experimental		mature miRNA	standard	MIMAT0029040	gga-miR-7443-5p
682	empty		1	22	31	control	control_empty
683	empty		1	23	1	control	control_empty
684	gga-miR-100-3p	AAGCUUGUAUCUAUAGGUAUG	1	23	2	experimental		mature miRNA	standard	MIMAT0026539	gga-miR-100-3p
685	gga-miR-1557	CCCGUCGGCUGAGCGGCUGC	1	23	3	experimental		mature miRNA	standard	MIMAT0007414	gga-miR-1557
686	gga-miR-1645	UCUGCUGAAGUACUGUCAGA	1	23	4	experimental		mature miRNA	standard	MIMAT0007521	gga-miR-1645
687	gga-miR-1729-5p	AUCCCUUACUCACAUGAGUAGUC	1	23	5	experimental		mature miRNA	standard	MIMAT0007629	gga-miR-1729-5p
688	gga-miR-181a-5p	AACAUUCAACGCUGUCGGUGAGU	1	23	6	experimental		mature miRNA	standard	MIMAT0001168	gga-miR-181a-5p
689	gga-miR-30a-3p	CUUUCAGUCGGAUGUUUGCAGC	1	23	7	experimental		mature miRNA	standard	MIMAT0001136	gga-miR-30a-3p
690	gga-miR-6553-3p	AACACUACCCUGAGCUGCUCC	1	23	8	experimental		mature miRNA	standard	MIMAT0025614	gga-miR-6553-3p
691	gga-miR-6627-3p	GGAAUGAAGGUGAUGCUGUGGA	1	23	9	experimental		mature miRNA	standard	MIMAT0025723	gga-miR-6627-3p
692	gga-miR-7444-3p	AGUGUUAGGUGCAGCCUUGCUG	1	23	10	experimental		mature miRNA	standard	MIMAT0029043	gga-miR-7444-3p
693	empty		1	23	11	control	control_empty
694	gga-miR-100-3p	AAGCUUGUAUCUAUAGGUAUG	1	23	12	experimental		mature miRNA	standard	MIMAT0026539	gga-miR-100-3p
695	gga-miR-1557	CCCGUCGGCUGAGCGGCUGC	1	23	13	experimental		mature miRNA	standard	MIMAT0007414	gga-miR-1557
696	gga-miR-1645	UCUGCUGAAGUACUGUCAGA	1	23	14	experimental		mature miRNA	standard	MIMAT0007521	gga-miR-1645
697	gga-miR-1729-5p	AUCCCUUACUCACAUGAGUAGUC	1	23	15	experimental		mature miRNA	standard	MIMAT0007629	gga-miR-1729-5p
698	gga-miR-181a-5p	AACAUUCAACGCUGUCGGUGAGU	1	23	16	experimental		mature miRNA	standard	MIMAT0001168	gga-miR-181a-5p
699	gga-miR-30a-3p	CUUUCAGUCGGAUGUUUGCAGC	1	23	17	experimental		mature miRNA	standard	MIMAT0001136	gga-miR-30a-3p
700	gga-miR-6553-3p	AACACUACCCUGAGCUGCUCC	1	23	18	experimental		mature miRNA	standard	MIMAT0025614	gga-miR-6553-3p
701	gga-miR-6627-3p	GGAAUGAAGGUGAUGCUGUGGA	1	23	19	experimental		mature miRNA	standard	MIMAT0025723	gga-miR-6627-3p
702	gga-miR-7444-3p	AGUGUUAGGUGCAGCCUUGCUG	1	23	20	experimental		mature miRNA	standard	MIMAT0029043	gga-miR-7444-3p
703	empty		1	23	21	control	control_empty
704	gga-miR-100-3p	AAGCUUGUAUCUAUAGGUAUG	1	23	22	experimental		mature miRNA	standard	MIMAT0026539	gga-miR-100-3p
705	gga-miR-1557	CCCGUCGGCUGAGCGGCUGC	1	23	23	experimental		mature miRNA	standard	MIMAT0007414	gga-miR-1557
706	gga-miR-1645	UCUGCUGAAGUACUGUCAGA	1	23	24	experimental		mature miRNA	standard	MIMAT0007521	gga-miR-1645
707	gga-miR-1729-5p	AUCCCUUACUCACAUGAGUAGUC	1	23	25	experimental		mature miRNA	standard	MIMAT0007629	gga-miR-1729-5p
708	gga-miR-181a-5p	AACAUUCAACGCUGUCGGUGAGU	1	23	26	experimental		mature miRNA	standard	MIMAT0001168	gga-miR-181a-5p
709	gga-miR-30a-3p	CUUUCAGUCGGAUGUUUGCAGC	1	23	27	experimental		mature miRNA	standard	MIMAT0001136	gga-miR-30a-3p
710	gga-miR-6553-3p	AACACUACCCUGAGCUGCUCC	1	23	28	experimental		mature miRNA	standard	MIMAT0025614	gga-miR-6553-3p
711	gga-miR-6627-3p	GGAAUGAAGGUGAUGCUGUGGA	1	23	29	experimental		mature miRNA	standard	MIMAT0025723	gga-miR-6627-3p
712	gga-miR-7444-3p	AGUGUUAGGUGCAGCCUUGCUG	1	23	30	experimental		mature miRNA	standard	MIMAT0029043	gga-miR-7444-3p
713	empty		1	23	31	control	control_empty
714	empty		1	24	1	control	control_empty
715	gga-miR-100-5p	AACCCGUAGAUCCGAACUUGUG	1	24	2	experimental		mature miRNA	standard	MIMAT0001178	gga-miR-100-5p
716	gga-miR-1558	CUGCUGUGAUGGGAGCUCUG	1	24	3	experimental		mature miRNA	standard	MIMAT0007415	gga-miR-1558
717	gga-miR-1646	UCUGCCCUGCAGCACUGAGAUCU	1	24	4	experimental		mature miRNA	standard	MIMAT0007522	gga-miR-1646
718	gga-miR-1730-3p	AAGGCCAUGGCUGUUUGCUGCU	1	24	5	experimental		mature miRNA	standard	MIMAT0007632	gga-miR-1730-3p
719	gga-miR-181b-1-3p	UCACUGAACAAUGAAUGCAAC	1	24	6	experimental		mature miRNA	standard	MIMAT0026522	gga-miR-181b-1-3p
720	gga-miR-30a-5p	UGUAAACAUCCUCGACUGGAAG	1	24	7	experimental		mature miRNA	standard	MIMAT0001135	gga-miR-30a-5p
721	gga-miR-6553-5p	AGCAGCCCUGUGAUAGCUGUUUGC	1	24	8	experimental		mature miRNA	standard	MIMAT0025613	gga-miR-6553-5p
722	gga-miR-6628-3p	CAGAAGUCGUGGCCUGGCACA	1	24	9	experimental		mature miRNA	standard	MIMAT0025724	gga-miR-6628-3p
723	gga-miR-7444-5p	GUAAGGCUCCUUCUGACCUCC	1	24	10	experimental		mature miRNA	standard	MIMAT0029042	gga-miR-7444-5p
724	empty		1	24	11	control	control_empty
725	gga-miR-100-5p	AACCCGUAGAUCCGAACUUGUG	1	24	12	experimental		mature miRNA	standard	MIMAT0001178	gga-miR-100-5p
726	gga-miR-1558	CUGCUGUGAUGGGAGCUCUG	1	24	13	experimental		mature miRNA	standard	MIMAT0007415	gga-miR-1558
727	gga-miR-1646	UCUGCCCUGCAGCACUGAGAUCU	1	24	14	experimental		mature miRNA	standard	MIMAT0007522	gga-miR-1646
728	gga-miR-1730-3p	AAGGCCAUGGCUGUUUGCUGCU	1	24	15	experimental		mature miRNA	standard	MIMAT0007632	gga-miR-1730-3p
729	gga-miR-181b-1-3p	UCACUGAACAAUGAAUGCAAC	1	24	16	experimental		mature miRNA	standard	MIMAT0026522	gga-miR-181b-1-3p
730	gga-miR-30a-5p	UGUAAACAUCCUCGACUGGAAG	1	24	17	experimental		mature miRNA	standard	MIMAT0001135	gga-miR-30a-5p
731	gga-miR-6553-5p	AGCAGCCCUGUGAUAGCUGUUUGC	1	24	18	experimental		mature miRNA	standard	MIMAT0025613	gga-miR-6553-5p
732	gga-miR-6628-3p	CAGAAGUCGUGGCCUGGCACA	1	24	19	experimental		mature miRNA	standard	MIMAT0025724	gga-miR-6628-3p
733	gga-miR-7444-5p	GUAAGGCUCCUUCUGACCUCC	1	24	20	experimental		mature miRNA	standard	MIMAT0029042	gga-miR-7444-5p
734	empty		1	24	21	control	control_empty
735	gga-miR-100-5p	AACCCGUAGAUCCGAACUUGUG	1	24	22	experimental		mature miRNA	standard	MIMAT0001178	gga-miR-100-5p
736	gga-miR-1558	CUGCUGUGAUGGGAGCUCUG	1	24	23	experimental		mature miRNA	standard	MIMAT0007415	gga-miR-1558
737	gga-miR-1646	UCUGCCCUGCAGCACUGAGAUCU	1	24	24	experimental		mature miRNA	standard	MIMAT0007522	gga-miR-1646
738	gga-miR-1730-3p	AAGGCCAUGGCUGUUUGCUGCU	1	24	25	experimental		mature miRNA	standard	MIMAT0007632	gga-miR-1730-3p
739	gga-miR-181b-1-3p	UCACUGAACAAUGAAUGCAAC	1	24	26	experimental		mature miRNA	standard	MIMAT0026522	gga-miR-181b-1-3p
740	gga-miR-30a-5p	UGUAAACAUCCUCGACUGGAAG	1	24	27	experimental		mature miRNA	standard	MIMAT0001135	gga-miR-30a-5p
741	gga-miR-6553-5p	AGCAGCCCUGUGAUAGCUGUUUGC	1	24	28	experimental		mature miRNA	standard	MIMAT0025613	gga-miR-6553-5p
742	gga-miR-6628-3p	CAGAAGUCGUGGCCUGGCACA	1	24	29	experimental		mature miRNA	standard	MIMAT0025724	gga-miR-6628-3p
743	gga-miR-7444-5p	GUAAGGCUCCUUCUGACCUCC	1	24	30	experimental		mature miRNA	standard	MIMAT0029042	gga-miR-7444-5p
744	empty		1	24	31	control	control_empty
745	empty		1	25	1	control	control_empty
746	gga-miR-101-1-5p	UCGGUUAUCAUGGUACCGGUGCU	1	25	2	experimental		mature miRNA	standard	MIMAT0026545	gga-miR-101-1-5p
747	gga-miR-1559-3p	AGUUACAUGUAUGCAUCGAGCA	1	25	3	experimental		mature miRNA	standard	MIMAT0026775	gga-miR-1559-3p
748	gga-miR-1647	UCUCUGCCUGAGGGGUACUCU	1	25	4	experimental		mature miRNA	standard	MIMAT0007523	gga-miR-1647
749	gga-miR-1730-5p	CAGCUAACAGAGGUGGAACCUUG	1	25	5	experimental		mature miRNA	standard	MIMAT0007631	gga-miR-1730-5p
750	gga-miR-181b-2-3p	UCACUGAUCAAUGAAUGCAAA	1	25	6	experimental		mature miRNA	standard	MIMAT0031059	gga-miR-181b-2-3p
751	gga-miR-30b-3p	CUGGGGGGUGGAUGUUUACUUC	1	25	7	experimental		mature miRNA	standard	MIMAT0026512	gga-miR-30b-3p
752	gga-miR-6554-3p	UGCUGUGUGGUUUAAGGAUACU	1	25	8	experimental		mature miRNA	standard	MIMAT0025616	gga-miR-6554-3p
753	gga-miR-6629-5p	CUGGGAACUUGAGGCAGCUGUUGAGU	1	25	9	experimental		mature miRNA	standard	MIMAT0025725	gga-miR-6629-5p
754	gga-miR-7445-3p	GGAUGAGUCUGUUUAACUUUAU	1	25	10	experimental		mature miRNA	standard	MIMAT0029045	gga-miR-7445-3p
755	empty		1	25	11	control	control_empty
756	gga-miR-101-1-5p	UCGGUUAUCAUGGUACCGGUGCU	1	25	12	experimental		mature miRNA	standard	MIMAT0026545	gga-miR-101-1-5p
757	gga-miR-1559-3p	AGUUACAUGUAUGCAUCGAGCA	1	25	13	experimental		mature miRNA	standard	MIMAT0026775	gga-miR-1559-3p
758	gga-miR-1647	UCUCUGCCUGAGGGGUACUCU	1	25	14	experimental		mature miRNA	standard	MIMAT0007523	gga-miR-1647
759	gga-miR-1730-5p	CAGCUAACAGAGGUGGAACCUUG	1	25	15	experimental		mature miRNA	standard	MIMAT0007631	gga-miR-1730-5p
760	gga-miR-181b-2-3p	UCACUGAUCAAUGAAUGCAAA	1	25	16	experimental		mature miRNA	standard	MIMAT0031059	gga-miR-181b-2-3p
761	gga-miR-30b-3p	CUGGGGGGUGGAUGUUUACUUC	1	25	17	experimental		mature miRNA	standard	MIMAT0026512	gga-miR-30b-3p
762	gga-miR-6554-3p	UGCUGUGUGGUUUAAGGAUACU	1	25	18	experimental		mature miRNA	standard	MIMAT0025616	gga-miR-6554-3p
763	gga-miR-6629-5p	CUGGGAACUUGAGGCAGCUGUUGAGU	1	25	19	experimental		mature miRNA	standard	MIMAT0025725	gga-miR-6629-5p
764	gga-miR-7445-3p	GGAUGAGUCUGUUUAACUUUAU	1	25	20	experimental		mature miRNA	standard	MIMAT0029045	gga-miR-7445-3p
765	empty		1	25	21	control	control_empty
766	gga-miR-101-1-5p	UCGGUUAUCAUGGUACCGGUGCU	1	25	22	experimental		mature miRNA	standard	MIMAT0026545	gga-miR-101-1-5p
767	gga-miR-1559-3p	AGUUACAUGUAUGCAUCGAGCA	1	25	23	experimental		mature miRNA	standard	MIMAT0026775	gga-miR-1559-3p
768	gga-miR-1647	UCUCUGCCUGAGGGGUACUCU	1	25	24	experimental		mature miRNA	standard	MIMAT0007523	gga-miR-1647
769	gga-miR-1730-5p	CAGCUAACAGAGGUGGAACCUUG	1	25	25	experimental		mature miRNA	standard	MIMAT0007631	gga-miR-1730-5p
770	gga-miR-181b-2-3p	UCACUGAUCAAUGAAUGCAAA	1	25	26	experimental		mature miRNA	standard	MIMAT0031059	gga-miR-181b-2-3p
771	gga-miR-30b-3p	CUGGGGGGUGGAUGUUUACUUC	1	25	27	experimental		mature miRNA	standard	MIMAT0026512	gga-miR-30b-3p
772	gga-miR-6554-3p	UGCUGUGUGGUUUAAGGAUACU	1	25	28	experimental		mature miRNA	standard	MIMAT0025616	gga-miR-6554-3p
773	gga-miR-6629-5p	CUGGGAACUUGAGGCAGCUGUUGAGU	1	25	29	experimental		mature miRNA	standard	MIMAT0025725	gga-miR-6629-5p
774	gga-miR-7445-3p	GGAUGAGUCUGUUUAACUUUAU	1	25	30	experimental		mature miRNA	standard	MIMAT0029045	gga-miR-7445-3p
775	empty		1	25	31	control	control_empty
776	empty		1	26	1	control	control_empty
777	gga-miR-101-2-5p	UCAGUUAUCACAGUGCUGAUGCU	1	26	2	experimental		mature miRNA	standard	MIMAT0031077	gga-miR-101-2-5p
778	gga-miR-1559-5p	UUCGAUGCUUGUAUGCUACUCC	1	26	3	experimental		mature miRNA	standard	MIMAT0007416	gga-miR-1559-5p
779	gga-miR-1648-3p	UGGGAGUGGAGCGGAGCUGUC	1	26	4	experimental		mature miRNA	standard	MIMAT0007525	gga-miR-1648-3p
780	gga-miR-1731-3p	UGGCAGUUCCUUGGUCUUGUCC	1	26	5	experimental		mature miRNA	standard	MIMAT0026780	gga-miR-1731-3p
781	gga-miR-181b-5p	AACAUUCAUUGCUGUCGGUGGG	1	26	6	experimental		mature miRNA	standard	MIMAT0001151	gga-miR-181b-5p
782	gga-miR-30b-5p	UGUAAACAUCCUACACUCAGCU	1	26	7	experimental		mature miRNA	standard	MIMAT0001130	gga-miR-30b-5p
783	gga-miR-6554-5p	UGUUUUUACAUUACACAGCAUA	1	26	8	experimental		mature miRNA	standard	MIMAT0025615	gga-miR-6554-5p
784	gga-miR-6630-3p	CUGCACAAACCGAAGGCUUUUU	1	26	9	experimental		mature miRNA	standard	MIMAT0025726	gga-miR-6630-3p
785	gga-miR-7445-5p	AAAGUUAAACAGACUCAUCCAC	1	26	10	experimental		mature miRNA	standard	MIMAT0029044	gga-miR-7445-5p
786	empty		1	26	11	control	control_empty
787	gga-miR-101-2-5p	UCAGUUAUCACAGUGCUGAUGCU	1	26	12	experimental		mature miRNA	standard	MIMAT0031077	gga-miR-101-2-5p
788	gga-miR-1559-5p	UUCGAUGCUUGUAUGCUACUCC	1	26	13	experimental		mature miRNA	standard	MIMAT0007416	gga-miR-1559-5p
789	gga-miR-1648-3p	UGGGAGUGGAGCGGAGCUGUC	1	26	14	experimental		mature miRNA	standard	MIMAT0007525	gga-miR-1648-3p
790	gga-miR-1731-3p	UGGCAGUUCCUUGGUCUUGUCC	1	26	15	experimental		mature miRNA	standard	MIMAT0026780	gga-miR-1731-3p
791	gga-miR-181b-5p	AACAUUCAUUGCUGUCGGUGGG	1	26	16	experimental		mature miRNA	standard	MIMAT0001151	gga-miR-181b-5p
792	gga-miR-30b-5p	UGUAAACAUCCUACACUCAGCU	1	26	17	experimental		mature miRNA	standard	MIMAT0001130	gga-miR-30b-5p
793	gga-miR-6554-5p	UGUUUUUACAUUACACAGCAUA	1	26	18	experimental		mature miRNA	standard	MIMAT0025615	gga-miR-6554-5p
794	gga-miR-6630-3p	CUGCACAAACCGAAGGCUUUUU	1	26	19	experimental		mature miRNA	standard	MIMAT0025726	gga-miR-6630-3p
795	gga-miR-7445-5p	AAAGUUAAACAGACUCAUCCAC	1	26	20	experimental		mature miRNA	standard	MIMAT0029044	gga-miR-7445-5p
796	empty		1	26	21	control	control_empty
797	gga-miR-101-2-5p	UCAGUUAUCACAGUGCUGAUGCU	1	26	22	experimental		mature miRNA	standard	MIMAT0031077	gga-miR-101-2-5p
798	gga-miR-1559-5p	UUCGAUGCUUGUAUGCUACUCC	1	26	23	experimental		mature miRNA	standard	MIMAT0007416	gga-miR-1559-5p
799	gga-miR-1648-3p	UGGGAGUGGAGCGGAGCUGUC	1	26	24	experimental		mature miRNA	standard	MIMAT0007525	gga-miR-1648-3p
800	gga-miR-1731-3p	UGGCAGUUCCUUGGUCUUGUCC	1	26	25	experimental		mature miRNA	standard	MIMAT0026780	gga-miR-1731-3p
801	gga-miR-181b-5p	AACAUUCAUUGCUGUCGGUGGG	1	26	26	experimental		mature miRNA	standard	MIMAT0001151	gga-miR-181b-5p
802	gga-miR-30b-5p	UGUAAACAUCCUACACUCAGCU	1	26	27	experimental		mature miRNA	standard	MIMAT0001130	gga-miR-30b-5p
803	gga-miR-6554-5p	UGUUUUUACAUUACACAGCAUA	1	26	28	experimental		mature miRNA	standard	MIMAT0025615	gga-miR-6554-5p
804	gga-miR-6630-3p	CUGCACAAACCGAAGGCUUUUU	1	26	29	experimental		mature miRNA	standard	MIMAT0025726	gga-miR-6630-3p
805	gga-miR-7445-5p	AAAGUUAAACAGACUCAUCCAC	1	26	30	experimental		mature miRNA	standard	MIMAT0029044	gga-miR-7445-5p
806	empty		1	26	31	control	control_empty
807	empty		1	27	1	control	control_empty
808	gga-miR-101-3p	GUACAGUACUGUGAUAACUGAA	1	27	2	experimental		mature miRNA	standard	MIMAT0001185	gga-miR-101-3p
809	gga-miR-1560-3p	GCAUCUCUGGACGCGCUCGUUC	1	27	3	experimental		mature miRNA	standard	MIMAT0007418	gga-miR-1560-3p
810	gga-miR-1648-5p	CGGCUCGGCUCGGCUCCGCUC	1	27	4	experimental		mature miRNA	standard	MIMAT0007524	gga-miR-1648-5p
811	gga-miR-1731-5p	ACUUGACUGCAGGCACUGCUGCU	1	27	5	experimental		mature miRNA	standard	MIMAT0007633	gga-miR-1731-5p
812	gga-miR-183	UAUGGCACUGGUAGAAUUCACUG	1	27	6	experimental		mature miRNA	standard	MIMAT0001191	gga-miR-183
813	gga-miR-30c-1-3p	UGGGAGAGGAUUGUUUACGCC	1	27	7	experimental		mature miRNA	standard	MIMAT0031105	gga-miR-30c-1-3p
814	gga-miR-6555-3p	AAUGUGGCCUCAACAGAGCAG	1	27	8	experimental		mature miRNA	standard	MIMAT0025620	gga-miR-6555-3p
815	gga-miR-6631-5p	GAAGAGAAUGCUGUGGUUCUGC	1	27	9	experimental		mature miRNA	standard	MIMAT0025727	gga-miR-6631-5p
816	gga-miR-7446-3p	GCGGACGUGUGAGGAGGG	1	27	10	experimental		mature miRNA	standard	MIMAT0029047	gga-miR-7446-3p
817	empty		1	27	11	control	control_empty
818	gga-miR-101-3p	GUACAGUACUGUGAUAACUGAA	1	27	12	experimental		mature miRNA	standard	MIMAT0001185	gga-miR-101-3p
819	gga-miR-1560-3p	GCAUCUCUGGACGCGCUCGUUC	1	27	13	experimental		mature miRNA	standard	MIMAT0007418	gga-miR-1560-3p
820	gga-miR-1648-5p	CGGCUCGGCUCGGCUCCGCUC	1	27	14	experimental		mature miRNA	standard	MIMAT0007524	gga-miR-1648-5p
821	gga-miR-1731-5p	ACUUGACUGCAGGCACUGCUGCU	1	27	15	experimental		mature miRNA	standard	MIMAT0007633	gga-miR-1731-5p
822	gga-miR-183	UAUGGCACUGGUAGAAUUCACUG	1	27	16	experimental		mature miRNA	standard	MIMAT0001191	gga-miR-183
823	gga-miR-30c-1-3p	UGGGAGAGGAUUGUUUACGCC	1	27	17	experimental		mature miRNA	standard	MIMAT0031105	gga-miR-30c-1-3p
824	gga-miR-6555-3p	AAUGUGGCCUCAACAGAGCAG	1	27	18	experimental		mature miRNA	standard	MIMAT0025620	gga-miR-6555-3p
825	gga-miR-6631-5p	GAAGAGAAUGCUGUGGUUCUGC	1	27	19	experimental		mature miRNA	standard	MIMAT0025727	gga-miR-6631-5p
826	gga-miR-7446-3p	GCGGACGUGUGAGGAGGG	1	27	20	experimental		mature miRNA	standard	MIMAT0029047	gga-miR-7446-3p
827	empty		1	27	21	control	control_empty
828	gga-miR-101-3p	GUACAGUACUGUGAUAACUGAA	1	27	22	experimental		mature miRNA	standard	MIMAT0001185	gga-miR-101-3p
829	gga-miR-1560-3p	GCAUCUCUGGACGCGCUCGUUC	1	27	23	experimental		mature miRNA	standard	MIMAT0007418	gga-miR-1560-3p
830	gga-miR-1648-5p	CGGCUCGGCUCGGCUCCGCUC	1	27	24	experimental		mature miRNA	standard	MIMAT0007524	gga-miR-1648-5p
831	gga-miR-1731-5p	ACUUGACUGCAGGCACUGCUGCU	1	27	25	experimental		mature miRNA	standard	MIMAT0007633	gga-miR-1731-5p
832	gga-miR-183	UAUGGCACUGGUAGAAUUCACUG	1	27	26	experimental		mature miRNA	standard	MIMAT0001191	gga-miR-183
833	gga-miR-30c-1-3p	UGGGAGAGGAUUGUUUACGCC	1	27	27	experimental		mature miRNA	standard	MIMAT0031105	gga-miR-30c-1-3p
834	gga-miR-6555-3p	AAUGUGGCCUCAACAGAGCAG	1	27	28	experimental		mature miRNA	standard	MIMAT0025620	gga-miR-6555-3p
835	gga-miR-6631-5p	GAAGAGAAUGCUGUGGUUCUGC	1	27	29	experimental		mature miRNA	standard	MIMAT0025727	gga-miR-6631-5p
836	gga-miR-7446-3p	GCGGACGUGUGAGGAGGG	1	27	30	experimental		mature miRNA	standard	MIMAT0029047	gga-miR-7446-3p
837	empty		1	27	31	control	control_empty
838	empty		1	28	1	control	control_empty
839	gga-miR-103-1-5p	UCGGCUUCUUUACAGUGCUGCCUUG	1	28	2	experimental		mature miRNA	standard	MIMAT0031070	gga-miR-103-1-5p
840	gga-miR-1560-5p	GCGGCGCGAGCAGAGAGGCGCU	1	28	3	experimental		mature miRNA	standard	MIMAT0007417	gga-miR-1560-5p
841	gga-miR-1649-3p	CUCCGUGCACUCUGCAGGCA	1	28	4	experimental		mature miRNA	standard	MIMAT0007527	gga-miR-1649-3p
842	gga-miR-1732	CACCGUGCUGCUGUCGGGCUG	1	28	5	experimental		mature miRNA	standard	MIMAT0007634	gga-miR-1732
843	gga-miR-184-3p	UGGACGGAGAACUGAUAAGGGU	1	28	6	experimental		mature miRNA	standard	MIMAT0001158	gga-miR-184-3p
844	gga-miR-30c-2-3p	UGGGAGAAGGCUGUUUACUCU	1	28	7	experimental		mature miRNA	standard	MIMAT0026515	gga-miR-30c-2-3p
845	gga-miR-6555-5p	GAUCUGCAGAGCCCACAACUAG	1	28	8	experimental		mature miRNA	standard	MIMAT0025619	gga-miR-6555-5p
846	gga-miR-6632-5p	AGAGAUGAGAGGAGUGGAUGACAGC	1	28	9	experimental		mature miRNA	standard	MIMAT0025728	gga-miR-6632-5p
847	gga-miR-7446-5p	CGCCAUGUCCACCUCCGCGC	1	28	10	experimental		mature miRNA	standard	MIMAT0029046	gga-miR-7446-5p
848	empty		1	28	11	control	control_empty
849	gga-miR-103-1-5p	UCGGCUUCUUUACAGUGCUGCCUUG	1	28	12	experimental		mature miRNA	standard	MIMAT0031070	gga-miR-103-1-5p
850	gga-miR-1560-5p	GCGGCGCGAGCAGAGAGGCGCU	1	28	13	experimental		mature miRNA	standard	MIMAT0007417	gga-miR-1560-5p
851	gga-miR-1649-3p	CUCCGUGCACUCUGCAGGCA	1	28	14	experimental		mature miRNA	standard	MIMAT0007527	gga-miR-1649-3p
852	gga-miR-1732	CACCGUGCUGCUGUCGGGCUG	1	28	15	experimental		mature miRNA	standard	MIMAT0007634	gga-miR-1732
853	gga-miR-184-3p	UGGACGGAGAACUGAUAAGGGU	1	28	16	experimental		mature miRNA	standard	MIMAT0001158	gga-miR-184-3p
854	gga-miR-30c-2-3p	UGGGAGAAGGCUGUUUACUCU	1	28	17	experimental		mature miRNA	standard	MIMAT0026515	gga-miR-30c-2-3p
855	gga-miR-6555-5p	GAUCUGCAGAGCCCACAACUAG	1	28	18	experimental		mature miRNA	standard	MIMAT0025619	gga-miR-6555-5p
856	gga-miR-6632-5p	AGAGAUGAGAGGAGUGGAUGACAGC	1	28	19	experimental		mature miRNA	standard	MIMAT0025728	gga-miR-6632-5p
857	gga-miR-7446-5p	CGCCAUGUCCACCUCCGCGC	1	28	20	experimental		mature miRNA	standard	MIMAT0029046	gga-miR-7446-5p
858	empty		1	28	21	control	control_empty
859	gga-miR-103-1-5p	UCGGCUUCUUUACAGUGCUGCCUUG	1	28	22	experimental		mature miRNA	standard	MIMAT0031070	gga-miR-103-1-5p
860	gga-miR-1560-5p	GCGGCGCGAGCAGAGAGGCGCU	1	28	23	experimental		mature miRNA	standard	MIMAT0007417	gga-miR-1560-5p
861	gga-miR-1649-3p	CUCCGUGCACUCUGCAGGCA	1	28	24	experimental		mature miRNA	standard	MIMAT0007527	gga-miR-1649-3p
862	gga-miR-1732	CACCGUGCUGCUGUCGGGCUG	1	28	25	experimental		mature miRNA	standard	MIMAT0007634	gga-miR-1732
863	gga-miR-184-3p	UGGACGGAGAACUGAUAAGGGU	1	28	26	experimental		mature miRNA	standard	MIMAT0001158	gga-miR-184-3p
864	gga-miR-30c-2-3p	UGGGAGAAGGCUGUUUACUCU	1	28	27	experimental		mature miRNA	standard	MIMAT0026515	gga-miR-30c-2-3p
865	gga-miR-6555-5p	GAUCUGCAGAGCCCACAACUAG	1	28	28	experimental		mature miRNA	standard	MIMAT0025619	gga-miR-6555-5p
866	gga-miR-6632-5p	AGAGAUGAGAGGAGUGGAUGACAGC	1	28	29	experimental		mature miRNA	standard	MIMAT0025728	gga-miR-6632-5p
867	gga-miR-7446-5p	CGCCAUGUCCACCUCCGCGC	1	28	30	experimental		mature miRNA	standard	MIMAT0029046	gga-miR-7446-5p
868	empty		1	28	31	control	control_empty
869	empty		1	29	1	control	control_empty
870	gga-miR-103-2-5p	AGCUUCUUUACAGUGCUGCCUUG	1	29	2	experimental		mature miRNA	standard	MIMAT0026519	gga-miR-103-2-5p
871	gga-miR-1561	GCCGGGUUUGCGGCCGCUUUU	1	29	3	experimental		mature miRNA	standard	MIMAT0007419	gga-miR-1561
872	gga-miR-1649-5p	UCCUGCAGAAGGUGCGGCUG	1	29	4	experimental		mature miRNA	standard	MIMAT0007526	gga-miR-1649-5p
873	gga-miR-1733	CUGGAUGGCUGUGAAUUGUCU	1	29	5	experimental		mature miRNA	standard	MIMAT0007635	gga-miR-1733
874	gga-miR-1845	CCGGCUGCGCCCGGAGGA	1	29	6	experimental		mature miRNA	standard	MIMAT0007749	gga-miR-1845
875	gga-miR-30c-5p	UGUAAACAUCCUACACUCUCAGCU	1	29	7	experimental		mature miRNA	standard	MIMAT0001137	gga-miR-30c-5p
876	gga-miR-6556-3p	GGCGGCGGUCCGAGCAGCUCCC	1	29	8	experimental		mature miRNA	standard	MIMAT0025622	gga-miR-6556-3p
877	gga-miR-6633-5p	AGAGGAAACUAUGGCUGACUGU	1	29	9	experimental		mature miRNA	standard	MIMAT0025729	gga-miR-6633-5p
878	gga-miR-7447-3p	UGAGCACUCAGCCCAACUCCUA	1	29	10	experimental		mature miRNA	standard	MIMAT0029049	gga-miR-7447-3p
879	empty		1	29	11	control	control_empty
880	gga-miR-103-2-5p	AGCUUCUUUACAGUGCUGCCUUG	1	29	12	experimental		mature miRNA	standard	MIMAT0026519	gga-miR-103-2-5p
881	gga-miR-1561	GCCGGGUUUGCGGCCGCUUUU	1	29	13	experimental		mature miRNA	standard	MIMAT0007419	gga-miR-1561
882	gga-miR-1649-5p	UCCUGCAGAAGGUGCGGCUG	1	29	14	experimental		mature miRNA	standard	MIMAT0007526	gga-miR-1649-5p
883	gga-miR-1733	CUGGAUGGCUGUGAAUUGUCU	1	29	15	experimental		mature miRNA	standard	MIMAT0007635	gga-miR-1733
884	gga-miR-1845	CCGGCUGCGCCCGGAGGA	1	29	16	experimental		mature miRNA	standard	MIMAT0007749	gga-miR-1845
885	gga-miR-30c-5p	UGUAAACAUCCUACACUCUCAGCU	1	29	17	experimental		mature miRNA	standard	MIMAT0001137	gga-miR-30c-5p
886	gga-miR-6556-3p	GGCGGCGGUCCGAGCAGCUCCC	1	29	18	experimental		mature miRNA	standard	MIMAT0025622	gga-miR-6556-3p
887	gga-miR-6633-5p	AGAGGAAACUAUGGCUGACUGU	1	29	19	experimental		mature miRNA	standard	MIMAT0025729	gga-miR-6633-5p
888	gga-miR-7447-3p	UGAGCACUCAGCCCAACUCCUA	1	29	20	experimental		mature miRNA	standard	MIMAT0029049	gga-miR-7447-3p
889	empty		1	29	21	control	control_empty
890	gga-miR-103-2-5p	AGCUUCUUUACAGUGCUGCCUUG	1	29	22	experimental		mature miRNA	standard	MIMAT0026519	gga-miR-103-2-5p
891	gga-miR-1561	GCCGGGUUUGCGGCCGCUUUU	1	29	23	experimental		mature miRNA	standard	MIMAT0007419	gga-miR-1561
892	gga-miR-1649-5p	UCCUGCAGAAGGUGCGGCUG	1	29	24	experimental		mature miRNA	standard	MIMAT0007526	gga-miR-1649-5p
893	gga-miR-1733	CUGGAUGGCUGUGAAUUGUCU	1	29	25	experimental		mature miRNA	standard	MIMAT0007635	gga-miR-1733
894	gga-miR-1845	CCGGCUGCGCCCGGAGGA	1	29	26	experimental		mature miRNA	standard	MIMAT0007749	gga-miR-1845
895	gga-miR-30c-5p	UGUAAACAUCCUACACUCUCAGCU	1	29	27	experimental		mature miRNA	standard	MIMAT0001137	gga-miR-30c-5p
896	gga-miR-6556-3p	GGCGGCGGUCCGAGCAGCUCCC	1	29	28	experimental		mature miRNA	standard	MIMAT0025622	gga-miR-6556-3p
897	gga-miR-6633-5p	AGAGGAAACUAUGGCUGACUGU	1	29	29	experimental		mature miRNA	standard	MIMAT0025729	gga-miR-6633-5p
898	gga-miR-7447-3p	UGAGCACUCAGCCCAACUCCUA	1	29	30	experimental		mature miRNA	standard	MIMAT0029049	gga-miR-7447-3p
899	empty		1	29	31	control	control_empty
900	empty		1	30	1	control	control_empty
901	gga-miR-103-3p	AGCAGCAUUGUACAGGGCUAUGA	1	30	2	experimental		mature miRNA	standard	MIMAT0001145	gga-miR-103-3p
902	gga-miR-1562-3p	UGUGCCCCGUGUAUGCAGUGCA	1	30	3	experimental		mature miRNA	standard	MIMAT0007421	gga-miR-1562-3p
903	gga-miR-1650	UCCUCUGAGCUCAGCUUCGCCUCU	1	30	4	experimental		mature miRNA	standard	MIMAT0007528	gga-miR-1650
904	gga-miR-1734	AUAUGCCCCAAUGUAUAAGCU	1	30	5	experimental		mature miRNA	standard	MIMAT0007636	gga-miR-1734
905	gga-miR-184-5p	CCUUAUCACUUUUCCAGCCCAGC	1	30	6	experimental		mature miRNA	standard	MIMAT0026526	gga-miR-184-5p
906	gga-miR-30d	UGUAAACAUCCCCGACUGGAAG	1	30	7	experimental		mature miRNA	standard	MIMAT0001129	gga-miR-30d
907	gga-miR-6556-5p	AAGGCUGCUCGGCCCGCGCUGC	1	30	8	experimental		mature miRNA	standard	MIMAT0025621	gga-miR-6556-5p
908	gga-miR-6634-5p	UCUCAGGGUUCUGAAGGAGCUGGC	1	30	9	experimental		mature miRNA	standard	MIMAT0025730	gga-miR-6634-5p
909	gga-miR-7447-5p	AAAGUUGGUAGUGAUUGCUGAUG	1	30	10	experimental		mature miRNA	standard	MIMAT0029048	gga-miR-7447-5p
910	empty		1	30	11	control	control_empty
911	gga-miR-103-3p	AGCAGCAUUGUACAGGGCUAUGA	1	30	12	experimental		mature miRNA	standard	MIMAT0001145	gga-miR-103-3p
912	gga-miR-1562-3p	UGUGCCCCGUGUAUGCAGUGCA	1	30	13	experimental		mature miRNA	standard	MIMAT0007421	gga-miR-1562-3p
913	gga-miR-1650	UCCUCUGAGCUCAGCUUCGCCUCU	1	30	14	experimental		mature miRNA	standard	MIMAT0007528	gga-miR-1650
914	gga-miR-1734	AUAUGCCCCAAUGUAUAAGCU	1	30	15	experimental		mature miRNA	standard	MIMAT0007636	gga-miR-1734
915	gga-miR-184-5p	CCUUAUCACUUUUCCAGCCCAGC	1	30	16	experimental		mature miRNA	standard	MIMAT0026526	gga-miR-184-5p
916	gga-miR-30d	UGUAAACAUCCCCGACUGGAAG	1	30	17	experimental		mature miRNA	standard	MIMAT0001129	gga-miR-30d
917	gga-miR-6556-5p	AAGGCUGCUCGGCCCGCGCUGC	1	30	18	experimental		mature miRNA	standard	MIMAT0025621	gga-miR-6556-5p
918	gga-miR-6634-5p	UCUCAGGGUUCUGAAGGAGCUGGC	1	30	19	experimental		mature miRNA	standard	MIMAT0025730	gga-miR-6634-5p
919	gga-miR-7447-5p	AAAGUUGGUAGUGAUUGCUGAUG	1	30	20	experimental		mature miRNA	standard	MIMAT0029048	gga-miR-7447-5p
920	empty		1	30	21	control	control_empty
921	gga-miR-103-3p	AGCAGCAUUGUACAGGGCUAUGA	1	30	22	experimental		mature miRNA	standard	MIMAT0001145	gga-miR-103-3p
922	gga-miR-1562-3p	UGUGCCCCGUGUAUGCAGUGCA	1	30	23	experimental		mature miRNA	standard	MIMAT0007421	gga-miR-1562-3p
923	gga-miR-1650	UCCUCUGAGCUCAGCUUCGCCUCU	1	30	24	experimental		mature miRNA	standard	MIMAT0007528	gga-miR-1650
924	gga-miR-1734	AUAUGCCCCAAUGUAUAAGCU	1	30	25	experimental		mature miRNA	standard	MIMAT0007636	gga-miR-1734
925	gga-miR-184-5p	CCUUAUCACUUUUCCAGCCCAGC	1	30	26	experimental		mature miRNA	standard	MIMAT0026526	gga-miR-184-5p
926	gga-miR-30d	UGUAAACAUCCCCGACUGGAAG	1	30	27	experimental		mature miRNA	standard	MIMAT0001129	gga-miR-30d
927	gga-miR-6556-5p	AAGGCUGCUCGGCCCGCGCUGC	1	30	28	experimental		mature miRNA	standard	MIMAT0025621	gga-miR-6556-5p
928	gga-miR-6634-5p	UCUCAGGGUUCUGAAGGAGCUGGC	1	30	29	experimental		mature miRNA	standard	MIMAT0025730	gga-miR-6634-5p
929	gga-miR-7447-5p	AAAGUUGGUAGUGAUUGCUGAUG	1	30	30	experimental		mature miRNA	standard	MIMAT0029048	gga-miR-7447-5p
930	empty		1	30	31	control	control_empty
931	empty		1	31	1	control	control_empty
932	gga-miR-106-3p	ACUGCAGUAUAAGCACUUCUGG	1	31	2	experimental		mature miRNA	standard	MIMAT0026517	gga-miR-106-3p
933	gga-miR-1562-5p	GCACUGUAGAUGGAGGGGCUGC	1	31	3	experimental		mature miRNA	standard	MIMAT0007420	gga-miR-1562-5p
934	gga-miR-1651-3p	UUGCUUUUGUUGGCCUCUGCUG	1	31	4	experimental		mature miRNA	standard	MIMAT0007530	gga-miR-1651-3p
935	gga-miR-1735	AGGGGCUUUGGGCAGCAUCUG	1	31	5	experimental		mature miRNA	standard	MIMAT0007637	gga-miR-1735
936	gga-miR-187-3p	UCGUGUCUUGUGUUGCAGCC	1	31	6	experimental		mature miRNA	standard	MIMAT0001124	gga-miR-187-3p
937	gga-miR-30e-3p	UUUCAGUCGGAUGUUUACAGC	1	31	7	experimental		mature miRNA	standard	MIMAT0026538	gga-miR-30e-3p
938	gga-miR-6557-3p	CGCGCCGAUUGUCUCCUCCGGGCAC	1	31	8	experimental		mature miRNA	standard	MIMAT0025829	gga-miR-6557-3p
939	gga-miR-6635-5p	GUGAAGGAUCAGAACAGCGUGCUU	1	31	9	experimental		mature miRNA	standard	MIMAT0025731	gga-miR-6635-5p
940	gga-miR-7448-3p	AACUGUUGUAGAACAGGAGAAGC	1	31	10	experimental		mature miRNA	standard	MIMAT0029051	gga-miR-7448-3p
941	empty		1	31	11	control	control_empty
942	gga-miR-106-3p	ACUGCAGUAUAAGCACUUCUGG	1	31	12	experimental		mature miRNA	standard	MIMAT0026517	gga-miR-106-3p
943	gga-miR-1562-5p	GCACUGUAGAUGGAGGGGCUGC	1	31	13	experimental		mature miRNA	standard	MIMAT0007420	gga-miR-1562-5p
944	gga-miR-1651-3p	UUGCUUUUGUUGGCCUCUGCUG	1	31	14	experimental		mature miRNA	standard	MIMAT0007530	gga-miR-1651-3p
945	gga-miR-1735	AGGGGCUUUGGGCAGCAUCUG	1	31	15	experimental		mature miRNA	standard	MIMAT0007637	gga-miR-1735
946	gga-miR-187-3p	UCGUGUCUUGUGUUGCAGCC	1	31	16	experimental		mature miRNA	standard	MIMAT0001124	gga-miR-187-3p
947	gga-miR-30e-3p	UUUCAGUCGGAUGUUUACAGC	1	31	17	experimental		mature miRNA	standard	MIMAT0026538	gga-miR-30e-3p
948	gga-miR-6557-3p	CGCGCCGAUUGUCUCCUCCGGGCAC	1	31	18	experimental		mature miRNA	standard	MIMAT0025829	gga-miR-6557-3p
949	gga-miR-6635-5p	GUGAAGGAUCAGAACAGCGUGCUU	1	31	19	experimental		mature miRNA	standard	MIMAT0025731	gga-miR-6635-5p
950	gga-miR-7448-3p	AACUGUUGUAGAACAGGAGAAGC	1	31	20	experimental		mature miRNA	standard	MIMAT0029051	gga-miR-7448-3p
951	empty		1	31	21	control	control_empty
952	gga-miR-106-3p	ACUGCAGUAUAAGCACUUCUGG	1	31	22	experimental		mature miRNA	standard	MIMAT0026517	gga-miR-106-3p
953	gga-miR-1562-5p	GCACUGUAGAUGGAGGGGCUGC	1	31	23	experimental		mature miRNA	standard	MIMAT0007420	gga-miR-1562-5p
954	gga-miR-1651-3p	UUGCUUUUGUUGGCCUCUGCUG	1	31	24	experimental		mature miRNA	standard	MIMAT0007530	gga-miR-1651-3p
955	gga-miR-1735	AGGGGCUUUGGGCAGCAUCUG	1	31	25	experimental		mature miRNA	standard	MIMAT0007637	gga-miR-1735
956	gga-miR-187-3p	UCGUGUCUUGUGUUGCAGCC	1	31	26	experimental		mature miRNA	standard	MIMAT0001124	gga-miR-187-3p
957	gga-miR-30e-3p	UUUCAGUCGGAUGUUUACAGC	1	31	27	experimental		mature miRNA	standard	MIMAT0026538	gga-miR-30e-3p
958	gga-miR-6557-3p	CGCGCCGAUUGUCUCCUCCGGGCAC	1	31	28	experimental		mature miRNA	standard	MIMAT0025829	gga-miR-6557-3p
959	gga-miR-6635-5p	GUGAAGGAUCAGAACAGCGUGCUU	1	31	29	experimental		mature miRNA	standard	MIMAT0025731	gga-miR-6635-5p
960	gga-miR-7448-3p	AACUGUUGUAGAACAGGAGAAGC	1	31	30	experimental		mature miRNA	standard	MIMAT0029051	gga-miR-7448-3p
961	empty		1	31	31	control	control_empty
962	empty		1	32	1	control	control_empty
963	gga-miR-106-5p	AAAAGUGCUUACAGUGCAGGUA	1	32	2	experimental		mature miRNA	standard	MIMAT0001142	gga-miR-106-5p
964	gga-miR-1563	GCACAUGAUGAGGAAGCACUGAAA	1	32	3	experimental		mature miRNA	standard	MIMAT0007422	gga-miR-1563
965	gga-miR-1651-5p	GCUAAGACUGAUAAAAGCAAGC	1	32	4	experimental		mature miRNA	standard	MIMAT0007529	gga-miR-1651-5p
966	gga-miR-1736-3p	AGCACCUUCGGAACUGUCCUCA	1	32	5	experimental		mature miRNA	standard	MIMAT0007639	gga-miR-1736-3p
967	gga-miR-187-5p	GGCUACAACACAGGACAUGGGA	1	32	6	experimental		mature miRNA	standard	MIMAT0026507	gga-miR-187-5p
968	gga-miR-30e-5p	UGUAAACAUCCUUGACUGG	1	32	7	experimental		mature miRNA	standard	MIMAT0001177	gga-miR-30e-5p
969	gga-miR-6557-5p	CCGGAGGAGCCCGGCGCUGC	1	32	8	experimental		mature miRNA	standard	MIMAT0025828	gga-miR-6557-5p
970	gga-miR-6637-3p	GCUGGGCUGUGCCUGCAAUCGGU	1	32	9	experimental		mature miRNA	standard	MIMAT0025733	gga-miR-6637-3p
971	gga-miR-7448-5p	CUCAUCCUCCAUGGUCUCCAGCAACGCC	1	32	10	experimental		mature miRNA	standard	MIMAT0029050	gga-miR-7448-5p
972	empty		1	32	11	control	control_empty
973	gga-miR-106-5p	AAAAGUGCUUACAGUGCAGGUA	1	32	12	experimental		mature miRNA	standard	MIMAT0001142	gga-miR-106-5p
974	gga-miR-1563	GCACAUGAUGAGGAAGCACUGAAA	1	32	13	experimental		mature miRNA	standard	MIMAT0007422	gga-miR-1563
975	gga-miR-1651-5p	GCUAAGACUGAUAAAAGCAAGC	1	32	14	experimental		mature miRNA	standard	MIMAT0007529	gga-miR-1651-5p
976	gga-miR-1736-3p	AGCACCUUCGGAACUGUCCUCA	1	32	15	experimental		mature miRNA	standard	MIMAT0007639	gga-miR-1736-3p
977	gga-miR-187-5p	GGCUACAACACAGGACAUGGGA	1	32	16	experimental		mature miRNA	standard	MIMAT0026507	gga-miR-187-5p
978	gga-miR-30e-5p	UGUAAACAUCCUUGACUGG	1	32	17	experimental		mature miRNA	standard	MIMAT0001177	gga-miR-30e-5p
979	gga-miR-6557-5p	CCGGAGGAGCCCGGCGCUGC	1	32	18	experimental		mature miRNA	standard	MIMAT0025828	gga-miR-6557-5p
980	gga-miR-6637-3p	GCUGGGCUGUGCCUGCAAUCGGU	1	32	19	experimental		mature miRNA	standard	MIMAT0025733	gga-miR-6637-3p
981	gga-miR-7448-5p	CUCAUCCUCCAUGGUCUCCAGCAACGCC	1	32	20	experimental		mature miRNA	standard	MIMAT0029050	gga-miR-7448-5p
982	empty		1	32	21	control	control_empty
983	gga-miR-106-5p	AAAAGUGCUUACAGUGCAGGUA	1	32	22	experimental		mature miRNA	standard	MIMAT0001142	gga-miR-106-5p
984	gga-miR-1563	GCACAUGAUGAGGAAGCACUGAAA	1	32	23	experimental		mature miRNA	standard	MIMAT0007422	gga-miR-1563
985	gga-miR-1651-5p	GCUAAGACUGAUAAAAGCAAGC	1	32	24	experimental		mature miRNA	standard	MIMAT0007529	gga-miR-1651-5p
986	gga-miR-1736-3p	AGCACCUUCGGAACUGUCCUCA	1	32	25	experimental		mature miRNA	standard	MIMAT0007639	gga-miR-1736-3p
987	gga-miR-187-5p	GGCUACAACACAGGACAUGGGA	1	32	26	experimental		mature miRNA	standard	MIMAT0026507	gga-miR-187-5p
988	gga-miR-30e-5p	UGUAAACAUCCUUGACUGG	1	32	27	experimental		mature miRNA	standard	MIMAT0001177	gga-miR-30e-5p
989	gga-miR-6557-5p	CCGGAGGAGCCCGGCGCUGC	1	32	28	experimental		mature miRNA	standard	MIMAT0025828	gga-miR-6557-5p
990	gga-miR-6637-3p	GCUGGGCUGUGCCUGCAAUCGGU	1	32	29	experimental		mature miRNA	standard	MIMAT0025733	gga-miR-6637-3p
991	gga-miR-7448-5p	CUCAUCCUCCAUGGUCUCCAGCAACGCC	1	32	30	experimental		mature miRNA	standard	MIMAT0029050	gga-miR-7448-5p
992	empty		1	32	31	control	control_empty
993	empty		1	33	1	control	control_empty
994	gga-miR-107-3p	AGCAGCAUUGUACAGGGCUAUCA	1	33	2	experimental		mature miRNA	standard	MIMAT0001147	gga-miR-107-3p
995	gga-miR-1564-3p	CUCCUCUGCCGUGCUGGUUGUG	1	33	3	experimental		mature miRNA	standard	MIMAT0007424	gga-miR-1564-3p
996	gga-miR-1652	UCCCUGUGUCCCCUCGGUGGCA	1	33	4	experimental		mature miRNA	standard	MIMAT0007531	gga-miR-1652
997	gga-miR-1736-5p	AGGGCAAUUCCUGAUAGGUGCU	1	33	5	experimental		mature miRNA	standard	MIMAT0007638	gga-miR-1736-5p
998	gga-miR-18a-3p	ACUGCCCUAAGUGCUCCUUCUG	1	33	6	experimental		mature miRNA	standard	MIMAT0026499	gga-miR-18a-3p
999	gga-miR-31-3p	UGCUAUGCCAACAUAUUGUCAUC	1	33	7	experimental		mature miRNA	standard	MIMAT0026549	gga-miR-31-3p
1000	gga-miR-6558-3p	AGGCCUUCUUGCGUAGCACUUGA	1	33	8	experimental		mature miRNA	standard	MIMAT0025624	gga-miR-6558-3p
1001	gga-miR-6639-5p	UACAGAACUUCGGCAUGAUUGCU	1	33	9	experimental		mature miRNA	standard	MIMAT0025735	gga-miR-6639-5p
1002	gga-miR-7449-3p	AGGGUUGGACGAGAUGGUCUUU	1	33	10	experimental		mature miRNA	standard	MIMAT0029053	gga-miR-7449-3p
1003	empty		1	33	11	control	control_empty
1004	gga-miR-107-3p	AGCAGCAUUGUACAGGGCUAUCA	1	33	12	experimental		mature miRNA	standard	MIMAT0001147	gga-miR-107-3p
1005	gga-miR-1564-3p	CUCCUCUGCCGUGCUGGUUGUG	1	33	13	experimental		mature miRNA	standard	MIMAT0007424	gga-miR-1564-3p
1006	gga-miR-1652	UCCCUGUGUCCCCUCGGUGGCA	1	33	14	experimental		mature miRNA	standard	MIMAT0007531	gga-miR-1652
1007	gga-miR-1736-5p	AGGGCAAUUCCUGAUAGGUGCU	1	33	15	experimental		mature miRNA	standard	MIMAT0007638	gga-miR-1736-5p
1008	gga-miR-18a-3p	ACUGCCCUAAGUGCUCCUUCUG	1	33	16	experimental		mature miRNA	standard	MIMAT0026499	gga-miR-18a-3p
1009	gga-miR-31-3p	UGCUAUGCCAACAUAUUGUCAUC	1	33	17	experimental		mature miRNA	standard	MIMAT0026549	gga-miR-31-3p
1010	gga-miR-6558-3p	AGGCCUUCUUGCGUAGCACUUGA	1	33	18	experimental		mature miRNA	standard	MIMAT0025624	gga-miR-6558-3p
1011	gga-miR-6639-5p	UACAGAACUUCGGCAUGAUUGCU	1	33	19	experimental		mature miRNA	standard	MIMAT0025735	gga-miR-6639-5p
1012	gga-miR-7449-3p	AGGGUUGGACGAGAUGGUCUUU	1	33	20	experimental		mature miRNA	standard	MIMAT0029053	gga-miR-7449-3p
1013	empty		1	33	21	control	control_empty
1014	gga-miR-107-3p	AGCAGCAUUGUACAGGGCUAUCA	1	33	22	experimental		mature miRNA	standard	MIMAT0001147	gga-miR-107-3p
1015	gga-miR-1564-3p	CUCCUCUGCCGUGCUGGUUGUG	1	33	23	experimental		mature miRNA	standard	MIMAT0007424	gga-miR-1564-3p
1016	gga-miR-1652	UCCCUGUGUCCCCUCGGUGGCA	1	33	24	experimental		mature miRNA	standard	MIMAT0007531	gga-miR-1652
1017	gga-miR-1736-5p	AGGGCAAUUCCUGAUAGGUGCU	1	33	25	experimental		mature miRNA	standard	MIMAT0007638	gga-miR-1736-5p
1018	gga-miR-18a-3p	ACUGCCCUAAGUGCUCCUUCUG	1	33	26	experimental		mature miRNA	standard	MIMAT0026499	gga-miR-18a-3p
1019	gga-miR-31-3p	UGCUAUGCCAACAUAUUGUCAUC	1	33	27	experimental		mature miRNA	standard	MIMAT0026549	gga-miR-31-3p
1020	gga-miR-6558-3p	AGGCCUUCUUGCGUAGCACUUGA	1	33	28	experimental		mature miRNA	standard	MIMAT0025624	gga-miR-6558-3p
1021	gga-miR-6639-5p	UACAGAACUUCGGCAUGAUUGCU	1	33	29	experimental		mature miRNA	standard	MIMAT0025735	gga-miR-6639-5p
1022	gga-miR-7449-3p	AGGGUUGGACGAGAUGGUCUUU	1	33	30	experimental		mature miRNA	standard	MIMAT0029053	gga-miR-7449-3p
1023	empty		1	33	31	control	control_empty
1024	empty		1	34	1	control	control_empty
1025	gga-miR-107-5p	AGCUUCUUUACAGUGUUGCCUUG	1	34	2	experimental		mature miRNA	standard	MIMAT0026520	gga-miR-107-5p
1026	gga-miR-1564-5p	GCAAUGAACACGGCAGUAGAGGU	1	34	3	experimental		mature miRNA	standard	MIMAT0007423	gga-miR-1564-5p
1027	gga-miR-1653	CAGGAGCUGUGCUGCAUGCAGG	1	34	4	experimental		mature miRNA	standard	MIMAT0007532	gga-miR-1653
1028	gga-miR-1737	CAGCACUGCUGCGCUCGGUG	1	34	5	experimental		mature miRNA	standard	MIMAT0007640	gga-miR-1737
1029	gga-miR-18a-5p	UAAGGUGCAUCUAGUGCAGAUA	1	34	6	experimental		mature miRNA	standard	MIMAT0001113	gga-miR-18a-5p
1030	gga-miR-31-5p	AGGCAAGAUGUUGGCAUAGCUG	1	34	7	experimental		mature miRNA	standard	MIMAT0001189	gga-miR-31-5p
1031	gga-miR-6558-5p	AAGUGAAACGUUGAGGUGGCUUGU	1	34	8	experimental		mature miRNA	standard	MIMAT0025623	gga-miR-6558-5p
1032	gga-miR-6640-5p	UCUGGAAUUGUAGUAGAGUGUAU	1	34	9	experimental		mature miRNA	standard	MIMAT0025736	gga-miR-6640-5p
1033	gga-miR-7449-5p	AGGUCAUCUAGUCCAACUUCCC	1	34	10	experimental		mature miRNA	standard	MIMAT0029052	gga-miR-7449-5p
1034	empty		1	34	11	control	control_empty
1035	gga-miR-107-5p	AGCUUCUUUACAGUGUUGCCUUG	1	34	12	experimental		mature miRNA	standard	MIMAT0026520	gga-miR-107-5p
1036	gga-miR-1564-5p	GCAAUGAACACGGCAGUAGAGGU	1	34	13	experimental		mature miRNA	standard	MIMAT0007423	gga-miR-1564-5p
1037	gga-miR-1653	CAGGAGCUGUGCUGCAUGCAGG	1	34	14	experimental		mature miRNA	standard	MIMAT0007532	gga-miR-1653
1038	gga-miR-1737	CAGCACUGCUGCGCUCGGUG	1	34	15	experimental		mature miRNA	standard	MIMAT0007640	gga-miR-1737
1039	gga-miR-18a-5p	UAAGGUGCAUCUAGUGCAGAUA	1	34	16	experimental		mature miRNA	standard	MIMAT0001113	gga-miR-18a-5p
1040	gga-miR-31-5p	AGGCAAGAUGUUGGCAUAGCUG	1	34	17	experimental		mature miRNA	standard	MIMAT0001189	gga-miR-31-5p
1041	gga-miR-6558-5p	AAGUGAAACGUUGAGGUGGCUUGU	1	34	18	experimental		mature miRNA	standard	MIMAT0025623	gga-miR-6558-5p
1042	gga-miR-6640-5p	UCUGGAAUUGUAGUAGAGUGUAU	1	34	19	experimental		mature miRNA	standard	MIMAT0025736	gga-miR-6640-5p
1043	gga-miR-7449-5p	AGGUCAUCUAGUCCAACUUCCC	1	34	20	experimental		mature miRNA	standard	MIMAT0029052	gga-miR-7449-5p
1044	empty		1	34	21	control	control_empty
1045	gga-miR-107-5p	AGCUUCUUUACAGUGUUGCCUUG	1	34	22	experimental		mature miRNA	standard	MIMAT0026520	gga-miR-107-5p
1046	gga-miR-1564-5p	GCAAUGAACACGGCAGUAGAGGU	1	34	23	experimental		mature miRNA	standard	MIMAT0007423	gga-miR-1564-5p
1047	gga-miR-1653	CAGGAGCUGUGCUGCAUGCAGG	1	34	24	experimental		mature miRNA	standard	MIMAT0007532	gga-miR-1653
1048	gga-miR-1737	CAGCACUGCUGCGCUCGGUG	1	34	25	experimental		mature miRNA	standard	MIMAT0007640	gga-miR-1737
1049	gga-miR-18a-5p	UAAGGUGCAUCUAGUGCAGAUA	1	34	26	experimental		mature miRNA	standard	MIMAT0001113	gga-miR-18a-5p
1050	gga-miR-31-5p	AGGCAAGAUGUUGGCAUAGCUG	1	34	27	experimental		mature miRNA	standard	MIMAT0001189	gga-miR-31-5p
1051	gga-miR-6558-5p	AAGUGAAACGUUGAGGUGGCUUGU	1	34	28	experimental		mature miRNA	standard	MIMAT0025623	gga-miR-6558-5p
1052	gga-miR-6640-5p	UCUGGAAUUGUAGUAGAGUGUAU	1	34	29	experimental		mature miRNA	standard	MIMAT0025736	gga-miR-6640-5p
1053	gga-miR-7449-5p	AGGUCAUCUAGUCCAACUUCCC	1	34	30	experimental		mature miRNA	standard	MIMAT0029052	gga-miR-7449-5p
1054	empty		1	34	31	control	control_empty
1055	empty		1	35	1	control	control_empty
1056	gga-miR-10a-3p	AAAUUCGUAUCUAGGGGAAUA	1	35	2	experimental		mature miRNA	standard	MIMAT0007732	gga-miR-10a-3p
1057	gga-miR-1565	CGAGGGUCGUGCCUGGUUUUGCU	1	35	3	experimental		mature miRNA	standard	MIMAT0007425	gga-miR-1565
1058	gga-miR-1654	UUGCUGGUGGAGGGAGCUGAG	1	35	4	experimental		mature miRNA	standard	MIMAT0007533	gga-miR-1654
1059	gga-miR-1738	ACUGACUGCUCAGAGGGAUUGG	1	35	5	experimental		mature miRNA	standard	MIMAT0007641	gga-miR-1738
1060	gga-miR-18b-3p	UACUGCCCUAAAUGCUCCUUCUGGC	1	35	6	experimental		mature miRNA	standard	MIMAT0026516	gga-miR-18b-3p
1061	gga-miR-32-3p	AAUUUAGUGUGUGCGAUACU	1	35	7	experimental		mature miRNA	standard	MIMAT0026508	gga-miR-32-3p
1062	gga-miR-6559-3p	AGAGUUGACUCUUCCUUGCAGU	1	35	8	experimental		mature miRNA	standard	MIMAT0025626	gga-miR-6559-3p
1063	gga-miR-6641-3p	CUGCUGGGAGAAAAAAGCUAU	1	35	9	experimental		mature miRNA	standard	MIMAT0025738	gga-miR-6641-3p
1064	gga-miR-7450-3p	CCCGUUUCCUGGAAGUGAUGGAGC	1	35	10	experimental		mature miRNA	standard	MIMAT0029055	gga-miR-7450-3p
1065	empty		1	35	11	control	control_empty
1066	gga-miR-10a-3p	AAAUUCGUAUCUAGGGGAAUA	1	35	12	experimental		mature miRNA	standard	MIMAT0007732	gga-miR-10a-3p
1067	gga-miR-1565	CGAGGGUCGUGCCUGGUUUUGCU	1	35	13	experimental		mature miRNA	standard	MIMAT0007425	gga-miR-1565
1068	gga-miR-1654	UUGCUGGUGGAGGGAGCUGAG	1	35	14	experimental		mature miRNA	standard	MIMAT0007533	gga-miR-1654
1069	gga-miR-1738	ACUGACUGCUCAGAGGGAUUGG	1	35	15	experimental		mature miRNA	standard	MIMAT0007641	gga-miR-1738
1070	gga-miR-18b-3p	UACUGCCCUAAAUGCUCCUUCUGGC	1	35	16	experimental		mature miRNA	standard	MIMAT0026516	gga-miR-18b-3p
1071	gga-miR-32-3p	AAUUUAGUGUGUGCGAUACU	1	35	17	experimental		mature miRNA	standard	MIMAT0026508	gga-miR-32-3p
1072	gga-miR-6559-3p	AGAGUUGACUCUUCCUUGCAGU	1	35	18	experimental		mature miRNA	standard	MIMAT0025626	gga-miR-6559-3p
1073	gga-miR-6641-3p	CUGCUGGGAGAAAAAAGCUAU	1	35	19	experimental		mature miRNA	standard	MIMAT0025738	gga-miR-6641-3p
1074	gga-miR-7450-3p	CCCGUUUCCUGGAAGUGAUGGAGC	1	35	20	experimental		mature miRNA	standard	MIMAT0029055	gga-miR-7450-3p
1075	empty		1	35	21	control	control_empty
1076	gga-miR-10a-3p	AAAUUCGUAUCUAGGGGAAUA	1	35	22	experimental		mature miRNA	standard	MIMAT0007732	gga-miR-10a-3p
1077	gga-miR-1565	CGAGGGUCGUGCCUGGUUUUGCU	1	35	23	experimental		mature miRNA	standard	MIMAT0007425	gga-miR-1565
1078	gga-miR-1654	UUGCUGGUGGAGGGAGCUGAG	1	35	24	experimental		mature miRNA	standard	MIMAT0007533	gga-miR-1654
1079	gga-miR-1738	ACUGACUGCUCAGAGGGAUUGG	1	35	25	experimental		mature miRNA	standard	MIMAT0007641	gga-miR-1738
1080	gga-miR-18b-3p	UACUGCCCUAAAUGCUCCUUCUGGC	1	35	26	experimental		mature miRNA	standard	MIMAT0026516	gga-miR-18b-3p
1081	gga-miR-32-3p	AAUUUAGUGUGUGCGAUACU	1	35	27	experimental		mature miRNA	standard	MIMAT0026508	gga-miR-32-3p
1082	gga-miR-6559-3p	AGAGUUGACUCUUCCUUGCAGU	1	35	28	experimental		mature miRNA	standard	MIMAT0025626	gga-miR-6559-3p
1083	gga-miR-6641-3p	CUGCUGGGAGAAAAAAGCUAU	1	35	29	experimental		mature miRNA	standard	MIMAT0025738	gga-miR-6641-3p
1084	gga-miR-7450-3p	CCCGUUUCCUGGAAGUGAUGGAGC	1	35	30	experimental		mature miRNA	standard	MIMAT0029055	gga-miR-7450-3p
1085	empty		1	35	31	control	control_empty
1086	BKG0		1	36	1	control	control_empty	LC Internal Use	control
1087	gga-miR-10a-5p	UACCCUGUAGAUCCGAAUUUGU	1	36	2	experimental		mature miRNA	standard	MIMAT0007731	gga-miR-10a-5p
1088	gga-miR-1567	GACUGCUCAUGGCUGCCUGUUC	1	36	3	experimental		mature miRNA	standard	MIMAT0007427	gga-miR-1567
1089	gga-miR-1655-3p	AUUUACCCAUGGUGGGCUGAUA	1	36	4	experimental		mature miRNA	standard	MIMAT0026777	gga-miR-1655-3p
1090	gga-miR-1739	CACAGGACAGGUAGCCAGGCUGG	1	36	5	experimental		mature miRNA	standard	MIMAT0007642	gga-miR-1739
1091	gga-miR-18b-5p	UAAGGUGCAUCUAGUGCAGUUA	1	36	6	experimental		mature miRNA	standard	MIMAT0001141	gga-miR-18b-5p
1092	gga-miR-32-5p	UAUUGCACAUUACUAAGUUGC	1	36	7	experimental		mature miRNA	standard	MIMAT0001125	gga-miR-32-5p
1093	gga-miR-6559-5p	UGGGAGAAAGAGUCAUUACCUGA	1	36	8	experimental		mature miRNA	standard	MIMAT0025625	gga-miR-6559-5p
1094	gga-miR-6641-5p	ACAGCUUUUUUAUUUCCAGUUA	1	36	9	experimental		mature miRNA	standard	MIMAT0025737	gga-miR-6641-5p
1095	gga-miR-7450-5p	UCUGUUCUUAAGGAGGCUGAGGC	1	36	10	experimental		mature miRNA	standard	MIMAT0029054	gga-miR-7450-5p
1096	BKG0		1	36	11	control	control_empty	LC Internal Use	control
1097	gga-miR-10a-5p	UACCCUGUAGAUCCGAAUUUGU	1	36	12	experimental		mature miRNA	standard	MIMAT0007731	gga-miR-10a-5p
1098	gga-miR-1567	GACUGCUCAUGGCUGCCUGUUC	1	36	13	experimental		mature miRNA	standard	MIMAT0007427	gga-miR-1567
1099	gga-miR-1655-3p	AUUUACCCAUGGUGGGCUGAUA	1	36	14	experimental		mature miRNA	standard	MIMAT0026777	gga-miR-1655-3p
1100	gga-miR-1739	CACAGGACAGGUAGCCAGGCUGG	1	36	15	experimental		mature miRNA	standard	MIMAT0007642	gga-miR-1739
1101	gga-miR-18b-5p	UAAGGUGCAUCUAGUGCAGUUA	1	36	16	experimental		mature miRNA	standard	MIMAT0001141	gga-miR-18b-5p
1102	gga-miR-32-5p	UAUUGCACAUUACUAAGUUGC	1	36	17	experimental		mature miRNA	standard	MIMAT0001125	gga-miR-32-5p
1103	gga-miR-6559-5p	UGGGAGAAAGAGUCAUUACCUGA	1	36	18	experimental		mature miRNA	standard	MIMAT0025625	gga-miR-6559-5p
1104	gga-miR-6641-5p	ACAGCUUUUUUAUUUCCAGUUA	1	36	19	experimental		mature miRNA	standard	MIMAT0025737	gga-miR-6641-5p
1105	gga-miR-7450-5p	UCUGUUCUUAAGGAGGCUGAGGC	1	36	20	experimental		mature miRNA	standard	MIMAT0029054	gga-miR-7450-5p
1106	BKG0		1	36	21	control	control_empty	LC Internal Use	control
1107	gga-miR-10a-5p	UACCCUGUAGAUCCGAAUUUGU	1	36	22	experimental		mature miRNA	standard	MIMAT0007731	gga-miR-10a-5p
1108	gga-miR-1567	GACUGCUCAUGGCUGCCUGUUC	1	36	23	experimental		mature miRNA	standard	MIMAT0007427	gga-miR-1567
1109	gga-miR-1655-3p	AUUUACCCAUGGUGGGCUGAUA	1	36	24	experimental		mature miRNA	standard	MIMAT0026777	gga-miR-1655-3p
1110	gga-miR-1739	CACAGGACAGGUAGCCAGGCUGG	1	36	25	experimental		mature miRNA	standard	MIMAT0007642	gga-miR-1739
1111	gga-miR-18b-5p	UAAGGUGCAUCUAGUGCAGUUA	1	36	26	experimental		mature miRNA	standard	MIMAT0001141	gga-miR-18b-5p
1112	gga-miR-32-5p	UAUUGCACAUUACUAAGUUGC	1	36	27	experimental		mature miRNA	standard	MIMAT0001125	gga-miR-32-5p
1113	gga-miR-6559-5p	UGGGAGAAAGAGUCAUUACCUGA	1	36	28	experimental		mature miRNA	standard	MIMAT0025625	gga-miR-6559-5p
1114	gga-miR-6641-5p	ACAGCUUUUUUAUUUCCAGUUA	1	36	29	experimental		mature miRNA	standard	MIMAT0025737	gga-miR-6641-5p
1115	gga-miR-7450-5p	UCUGUUCUUAAGGAGGCUGAGGC	1	36	30	experimental		mature miRNA	standard	MIMAT0029054	gga-miR-7450-5p
1116	BKG0		1	36	31	control	control_empty	LC Internal Use	control
1117	PUC2PM		1	37	1	control	control_spike_calibration	LC Internal Use	control
1118	gga-miR-10b-3p	AGAUUCGAUUCUAGGGGAAUA	1	37	2	experimental		mature miRNA	standard	MIMAT0026521	gga-miR-10b-3p
1119	gga-miR-1568	GACUCAUAGAUCUGAAGGCAG	1	37	3	experimental		mature miRNA	standard	MIMAT0007428	gga-miR-1568
1120	gga-miR-1655-5p	UCAGCUGGUCUUGGGUAAAUGC	1	37	4	experimental		mature miRNA	standard	MIMAT0007534	gga-miR-1655-5p
1121	gga-miR-17-3p	ACUGCAGUGAAGGCACUUGU	1	37	5	experimental		mature miRNA	standard	MIMAT0001115	gga-miR-17-3p
1122	gga-miR-190a-3p	CUAUAUAUCAAACAUAUUCCU	1	37	6	experimental		mature miRNA	standard	MIMAT0026525	gga-miR-190a-3p
1123	gga-miR-33-3p	AAUGUUCCUGCAGUGCAGUA	1	37	7	experimental		mature miRNA	standard	MIMAT0026490	gga-miR-33-3p
1124	gga-miR-6560-3p	UACCAGGAUGGACCGCUGCACACC	1	37	8	experimental		mature miRNA	standard	MIMAT0025628	gga-miR-6560-3p
1125	gga-miR-6642-3p	CGGGCGGCCGUCGGGGAAAGCGG	1	37	9	experimental		mature miRNA	standard	MIMAT0025740	gga-miR-6642-3p
1126	gga-miR-7451-3p	UUGCUUCUUCUUAUCCCACAGU	1	37	10	experimental		mature miRNA	standard	MIMAT0029057	gga-miR-7451-3p
1127	PUC2PM		1	37	11	control	control_spike_calibration	LC Internal Use	control
1128	gga-miR-10b-3p	AGAUUCGAUUCUAGGGGAAUA	1	37	12	experimental		mature miRNA	standard	MIMAT0026521	gga-miR-10b-3p
1129	gga-miR-1568	GACUCAUAGAUCUGAAGGCAG	1	37	13	experimental		mature miRNA	standard	MIMAT0007428	gga-miR-1568
1130	gga-miR-1655-5p	UCAGCUGGUCUUGGGUAAAUGC	1	37	14	experimental		mature miRNA	standard	MIMAT0007534	gga-miR-1655-5p
1131	gga-miR-17-3p	ACUGCAGUGAAGGCACUUGU	1	37	15	experimental		mature miRNA	standard	MIMAT0001115	gga-miR-17-3p
1132	gga-miR-190a-3p	CUAUAUAUCAAACAUAUUCCU	1	37	16	experimental		mature miRNA	standard	MIMAT0026525	gga-miR-190a-3p
1133	gga-miR-33-3p	AAUGUUCCUGCAGUGCAGUA	1	37	17	experimental		mature miRNA	standard	MIMAT0026490	gga-miR-33-3p
1134	gga-miR-6560-3p	UACCAGGAUGGACCGCUGCACACC	1	37	18	experimental		mature miRNA	standard	MIMAT0025628	gga-miR-6560-3p
1135	gga-miR-6642-3p	CGGGCGGCCGUCGGGGAAAGCGG	1	37	19	experimental		mature miRNA	standard	MIMAT0025740	gga-miR-6642-3p
1136	gga-miR-7451-3p	UUGCUUCUUCUUAUCCCACAGU	1	37	20	experimental		mature miRNA	standard	MIMAT0029057	gga-miR-7451-3p
1137	PUC2PM		1	37	21	control	control_spike_calibration	LC Internal Use	control
1138	gga-miR-10b-3p	AGAUUCGAUUCUAGGGGAAUA	1	37	22	experimental		mature miRNA	standard	MIMAT0026521	gga-miR-10b-3p
1139	gga-miR-1568	GACUCAUAGAUCUGAAGGCAG	1	37	23	experimental		mature miRNA	standard	MIMAT0007428	gga-miR-1568
1140	gga-miR-1655-5p	UCAGCUGGUCUUGGGUAAAUGC	1	37	24	experimental		mature miRNA	standard	MIMAT0007534	gga-miR-1655-5p
1141	gga-miR-17-3p	ACUGCAGUGAAGGCACUUGU	1	37	25	experimental		mature miRNA	standard	MIMAT0001115	gga-miR-17-3p
1142	gga-miR-190a-3p	CUAUAUAUCAAACAUAUUCCU	1	37	26	experimental		mature miRNA	standard	MIMAT0026525	gga-miR-190a-3p
1143	gga-miR-33-3p	AAUGUUCCUGCAGUGCAGUA	1	37	27	experimental		mature miRNA	standard	MIMAT0026490	gga-miR-33-3p
1144	gga-miR-6560-3p	UACCAGGAUGGACCGCUGCACACC	1	37	28	experimental		mature miRNA	standard	MIMAT0025628	gga-miR-6560-3p
1145	gga-miR-6642-3p	CGGGCGGCCGUCGGGGAAAGCGG	1	37	29	experimental		mature miRNA	standard	MIMAT0025740	gga-miR-6642-3p
1146	gga-miR-7451-3p	UUGCUUCUUCUUAUCCCACAGU	1	37	30	experimental		mature miRNA	standard	MIMAT0029057	gga-miR-7451-3p
1147	PUC2PM		1	37	31	control	control_spike_calibration	LC Internal Use	control
1148	PUC2MM		1	38	1	control	control_spike_calibration	LC Internal Use	control
1149	gga-miR-10b-5p	UACCCUGUAGAACCGAAUUUGU	1	38	2	experimental		mature miRNA	standard	MIMAT0001148	gga-miR-10b-5p
1150	gga-miR-1569	UGUUUGGGACGUUGCUCUGCAG	1	38	3	experimental		mature miRNA	standard	MIMAT0007429	gga-miR-1569
1151	gga-miR-1656	UCACCAGCGGGCAUUGGCAUCA	1	38	4	experimental		mature miRNA	standard	MIMAT0007535	gga-miR-1656
1152	gga-miR-1740-3p	UCAUCCAAUUAAACCACAAA	1	38	5	experimental		mature miRNA	standard	MIMAT0007644	gga-miR-1740-3p
1153	gga-miR-190a-5p	UGAUAUGUUUGAUAUAUUAGGU	1	38	6	experimental		mature miRNA	standard	MIMAT0001155	gga-miR-190a-5p
1154	gga-miR-33-5p	GUGCAUUGUAGUUGCAUUGC	1	38	7	experimental		mature miRNA	standard	MIMAT0001100	gga-miR-33-5p
1155	gga-miR-6560-5p	UGUGUUGCUCCAUACUGUGGUCU	1	38	8	experimental		mature miRNA	standard	MIMAT0025627	gga-miR-6560-5p
1156	gga-miR-6642-5p	UUCCCCGACGGCCGAGCGGGCC	1	38	9	experimental		mature miRNA	standard	MIMAT0025739	gga-miR-6642-5p
1157	gga-miR-7451-5p	CGUGGGAAUUAAGAGUGGCAGUC	1	38	10	experimental		mature miRNA	standard	MIMAT0029056	gga-miR-7451-5p
1158	PUC2MM		1	38	11	control	control_spike_calibration	LC Internal Use	control
1159	gga-miR-10b-5p	UACCCUGUAGAACCGAAUUUGU	1	38	12	experimental		mature miRNA	standard	MIMAT0001148	gga-miR-10b-5p
1160	gga-miR-1569	UGUUUGGGACGUUGCUCUGCAG	1	38	13	experimental		mature miRNA	standard	MIMAT0007429	gga-miR-1569
1161	gga-miR-1656	UCACCAGCGGGCAUUGGCAUCA	1	38	14	experimental		mature miRNA	standard	MIMAT0007535	gga-miR-1656
1162	gga-miR-1740-3p	UCAUCCAAUUAAACCACAAA	1	38	15	experimental		mature miRNA	standard	MIMAT0007644	gga-miR-1740-3p
1163	gga-miR-190a-5p	UGAUAUGUUUGAUAUAUUAGGU	1	38	16	experimental		mature miRNA	standard	MIMAT0001155	gga-miR-190a-5p
1164	gga-miR-33-5p	GUGCAUUGUAGUUGCAUUGC	1	38	17	experimental		mature miRNA	standard	MIMAT0001100	gga-miR-33-5p
1165	gga-miR-6560-5p	UGUGUUGCUCCAUACUGUGGUCU	1	38	18	experimental		mature miRNA	standard	MIMAT0025627	gga-miR-6560-5p
1166	gga-miR-6642-5p	UUCCCCGACGGCCGAGCGGGCC	1	38	19	experimental		mature miRNA	standard	MIMAT0025739	gga-miR-6642-5p
1167	gga-miR-7451-5p	CGUGGGAAUUAAGAGUGGCAGUC	1	38	20	experimental		mature miRNA	standard	MIMAT0029056	gga-miR-7451-5p
1168	PUC2MM		1	38	21	control	control_spike_calibration	LC Internal Use	control
1169	gga-miR-10b-5p	UACCCUGUAGAACCGAAUUUGU	1	38	22	experimental		mature miRNA	standard	MIMAT0001148	gga-miR-10b-5p
1170	gga-miR-1569	UGUUUGGGACGUUGCUCUGCAG	1	38	23	experimental		mature miRNA	standard	MIMAT0007429	gga-miR-1569
1171	gga-miR-1656	UCACCAGCGGGCAUUGGCAUCA	1	38	24	experimental		mature miRNA	standard	MIMAT0007535	gga-miR-1656
1172	gga-miR-1740-3p	UCAUCCAAUUAAACCACAAA	1	38	25	experimental		mature miRNA	standard	MIMAT0007644	gga-miR-1740-3p
1173	gga-miR-190a-5p	UGAUAUGUUUGAUAUAUUAGGU	1	38	26	experimental		mature miRNA	standard	MIMAT0001155	gga-miR-190a-5p
1174	gga-miR-33-5p	GUGCAUUGUAGUUGCAUUGC	1	38	27	experimental		mature miRNA	standard	MIMAT0001100	gga-miR-33-5p
1175	gga-miR-6560-5p	UGUGUUGCUCCAUACUGUGGUCU	1	38	28	experimental		mature miRNA	standard	MIMAT0025627	gga-miR-6560-5p
1176	gga-miR-6642-5p	UUCCCCGACGGCCGAGCGGGCC	1	38	29	experimental		mature miRNA	standard	MIMAT0025739	gga-miR-6642-5p
1177	gga-miR-7451-5p	CGUGGGAAUUAAGAGUGGCAGUC	1	38	30	experimental		mature miRNA	standard	MIMAT0029056	gga-miR-7451-5p
1178	PUC2MM		1	38	31	control	control_spike_calibration	LC Internal Use	control
1179	PUC2PM-20B		1	39	1	control	control_spike_calibration	LC Internal Use	control
1180	gga-miR-122-3p	AACGCCAUUAUCACACUAAAUA	1	39	2	experimental		mature miRNA	standard	MIMAT0026550	gga-miR-122-3p
1181	gga-miR-1570	GAAGGGUGUGCAGAAGAAUGUGA	1	39	3	experimental		mature miRNA	standard	MIMAT0007430	gga-miR-1570
1182	gga-miR-1657	UAUAUGUGUAUUGUUGGUGUGUG	1	39	4	experimental		mature miRNA	standard	MIMAT0007537	gga-miR-1657
1183	gga-miR-1740-5p	UGUAGUUUAAGAGGAUAGGUCUU	1	39	5	experimental		mature miRNA	standard	MIMAT0007643	gga-miR-1740-5p
1184	gga-miR-193a-3p	AACUGGCCUACAAAGUCCCAGU	1	39	6	experimental		mature miRNA	standard	MIMAT0007740	gga-miR-193a-3p
1185	gga-miR-34a-3p	CAAUCAGCAAGUAUACUGCCCUA	1	39	7	experimental		mature miRNA	standard	MIMAT0026535	gga-miR-34a-3p
1186	gga-miR-6561-3p	GGGAGCCCAGAACUGGAAACAG	1	39	8	experimental		mature miRNA	standard	MIMAT0025630	gga-miR-6561-3p
1187	gga-miR-6643-5p	CCAGGGCUGGCAGGGGAGGGU	1	39	9	experimental		mature miRNA	standard	MIMAT0025741	gga-miR-6643-5p
1188	gga-miR-7452-3p	GCGGAUUCUUGAACCAGUCCUGCUGC	1	39	10	experimental		mature miRNA	standard	MIMAT0029059	gga-miR-7452-3p
1189	PUC2PM-20B		1	39	11	control	control_spike_calibration	LC Internal Use	control
1190	gga-miR-122-3p	AACGCCAUUAUCACACUAAAUA	1	39	12	experimental		mature miRNA	standard	MIMAT0026550	gga-miR-122-3p
1191	gga-miR-1570	GAAGGGUGUGCAGAAGAAUGUGA	1	39	13	experimental		mature miRNA	standard	MIMAT0007430	gga-miR-1570
1192	gga-miR-1657	UAUAUGUGUAUUGUUGGUGUGUG	1	39	14	experimental		mature miRNA	standard	MIMAT0007537	gga-miR-1657
1193	gga-miR-1740-5p	UGUAGUUUAAGAGGAUAGGUCUU	1	39	15	experimental		mature miRNA	standard	MIMAT0007643	gga-miR-1740-5p
1194	gga-miR-193a-3p	AACUGGCCUACAAAGUCCCAGU	1	39	16	experimental		mature miRNA	standard	MIMAT0007740	gga-miR-193a-3p
1195	gga-miR-34a-3p	CAAUCAGCAAGUAUACUGCCCUA	1	39	17	experimental		mature miRNA	standard	MIMAT0026535	gga-miR-34a-3p
1196	gga-miR-6561-3p	GGGAGCCCAGAACUGGAAACAG	1	39	18	experimental		mature miRNA	standard	MIMAT0025630	gga-miR-6561-3p
1197	gga-miR-6643-5p	CCAGGGCUGGCAGGGGAGGGU	1	39	19	experimental		mature miRNA	standard	MIMAT0025741	gga-miR-6643-5p
1198	gga-miR-7452-3p	GCGGAUUCUUGAACCAGUCCUGCUGC	1	39	20	experimental		mature miRNA	standard	MIMAT0029059	gga-miR-7452-3p
1199	PUC2PM-20B		1	39	21	control	control_spike_calibration	LC Internal Use	control
1200	gga-miR-122-3p	AACGCCAUUAUCACACUAAAUA	1	39	22	experimental		mature miRNA	standard	MIMAT0026550	gga-miR-122-3p
1201	gga-miR-1570	GAAGGGUGUGCAGAAGAAUGUGA	1	39	23	experimental		mature miRNA	standard	MIMAT0007430	gga-miR-1570
1202	gga-miR-1657	UAUAUGUGUAUUGUUGGUGUGUG	1	39	24	experimental		mature miRNA	standard	MIMAT0007537	gga-miR-1657
1203	gga-miR-1740-5p	UGUAGUUUAAGAGGAUAGGUCUU	1	39	25	experimental		mature miRNA	standard	MIMAT0007643	gga-miR-1740-5p
1204	gga-miR-193a-3p	AACUGGCCUACAAAGUCCCAGU	1	39	26	experimental		mature miRNA	standard	MIMAT0007740	gga-miR-193a-3p
1205	gga-miR-34a-3p	CAAUCAGCAAGUAUACUGCCCUA	1	39	27	experimental		mature miRNA	standard	MIMAT0026535	gga-miR-34a-3p
1206	gga-miR-6561-3p	GGGAGCCCAGAACUGGAAACAG	1	39	28	experimental		mature miRNA	standard	MIMAT0025630	gga-miR-6561-3p
1207	gga-miR-6643-5p	CCAGGGCUGGCAGGGGAGGGU	1	39	29	experimental		mature miRNA	standard	MIMAT0025741	gga-miR-6643-5p
1208	gga-miR-7452-3p	GCGGAUUCUUGAACCAGUCCUGCUGC	1	39	30	experimental		mature miRNA	standard	MIMAT0029059	gga-miR-7452-3p
1209	PUC2PM-20B		1	39	31	control	control_spike_calibration	LC Internal Use	control
1210	PUC2MM-20B		1	40	1	control	control_spike_calibration	LC Internal Use	control
1211	gga-miR-122-5p	UGGAGUGUGACAAUGGUGUUUGU	1	40	2	experimental		mature miRNA	standard	MIMAT0001190	gga-miR-122-5p
1212	gga-miR-1571	UGUUUCCUAUCCAGGCAGCACU	1	40	3	experimental		mature miRNA	standard	MIMAT0007431	gga-miR-1571
1213	gga-miR-1658-3p	GAGCUGUGGGUUGGUGUUGAUGG	1	40	4	experimental		mature miRNA	standard	MIMAT0007539	gga-miR-1658-3p
1214	gga-miR-1741	AUGGCUCUGGAUUACACCUU	1	40	5	experimental		mature miRNA	standard	MIMAT0007645	gga-miR-1741
1215	gga-miR-193a-5p	UGGGUCUUUGCGGGCGAGAUGA	1	40	6	experimental		mature miRNA	standard	MIMAT0026787	gga-miR-193a-5p
1216	gga-miR-34a-5p	UGGCAGUGUCUUAGCUGGUUGUU	1	40	7	experimental		mature miRNA	standard	MIMAT0001173	gga-miR-34a-5p
1217	gga-miR-6561-5p	UCUUUCCAGGCAGGAGCUCCCU	1	40	8	experimental		mature miRNA	standard	MIMAT0025629	gga-miR-6561-5p
1218	gga-miR-6644-3p	GGGGCUAAGAUGGUACAGCGGA	1	40	9	experimental		mature miRNA	standard	MIMAT0025745	gga-miR-6644-3p
1219	gga-miR-7452-5p	ACAGGGCUGGCUGAUCCGUGC	1	40	10	experimental		mature miRNA	standard	MIMAT0029058	gga-miR-7452-5p
1220	PUC2MM-20B		1	40	11	control	control_spike_calibration	LC Internal Use	control
1221	gga-miR-122-5p	UGGAGUGUGACAAUGGUGUUUGU	1	40	12	experimental		mature miRNA	standard	MIMAT0001190	gga-miR-122-5p
1222	gga-miR-1571	UGUUUCCUAUCCAGGCAGCACU	1	40	13	experimental		mature miRNA	standard	MIMAT0007431	gga-miR-1571
1223	gga-miR-1658-3p	GAGCUGUGGGUUGGUGUUGAUGG	1	40	14	experimental		mature miRNA	standard	MIMAT0007539	gga-miR-1658-3p
1224	gga-miR-1741	AUGGCUCUGGAUUACACCUU	1	40	15	experimental		mature miRNA	standard	MIMAT0007645	gga-miR-1741
1225	gga-miR-193a-5p	UGGGUCUUUGCGGGCGAGAUGA	1	40	16	experimental		mature miRNA	standard	MIMAT0026787	gga-miR-193a-5p
1226	gga-miR-34a-5p	UGGCAGUGUCUUAGCUGGUUGUU	1	40	17	experimental		mature miRNA	standard	MIMAT0001173	gga-miR-34a-5p
1227	gga-miR-6561-5p	UCUUUCCAGGCAGGAGCUCCCU	1	40	18	experimental		mature miRNA	standard	MIMAT0025629	gga-miR-6561-5p
1228	gga-miR-6644-3p	GGGGCUAAGAUGGUACAGCGGA	1	40	19	experimental		mature miRNA	standard	MIMAT0025745	gga-miR-6644-3p
1229	gga-miR-7452-5p	ACAGGGCUGGCUGAUCCGUGC	1	40	20	experimental		mature miRNA	standard	MIMAT0029058	gga-miR-7452-5p
1230	PUC2MM-20B		1	40	21	control	control_spike_calibration	LC Internal Use	control
1231	gga-miR-122-5p	UGGAGUGUGACAAUGGUGUUUGU	1	40	22	experimental		mature miRNA	standard	MIMAT0001190	gga-miR-122-5p
1232	gga-miR-1571	UGUUUCCUAUCCAGGCAGCACU	1	40	23	experimental		mature miRNA	standard	MIMAT0007431	gga-miR-1571
1233	gga-miR-1658-3p	GAGCUGUGGGUUGGUGUUGAUGG	1	40	24	experimental		mature miRNA	standard	MIMAT0007539	gga-miR-1658-3p
1234	gga-miR-1741	AUGGCUCUGGAUUACACCUU	1	40	25	experimental		mature miRNA	standard	MIMAT0007645	gga-miR-1741
1235	gga-miR-193a-5p	UGGGUCUUUGCGGGCGAGAUGA	1	40	26	experimental		mature miRNA	standard	MIMAT0026787	gga-miR-193a-5p
1236	gga-miR-34a-5p	UGGCAGUGUCUUAGCUGGUUGUU	1	40	27	experimental		mature miRNA	standard	MIMAT0001173	gga-miR-34a-5p
1237	gga-miR-6561-5p	UCUUUCCAGGCAGGAGCUCCCU	1	40	28	experimental		mature miRNA	standard	MIMAT0025629	gga-miR-6561-5p
1238	gga-miR-6644-3p	GGGGCUAAGAUGGUACAGCGGA	1	40	29	experimental		mature miRNA	standard	MIMAT0025745	gga-miR-6644-3p
1239	gga-miR-7452-5p	ACAGGGCUGGCUGAUCCGUGC	1	40	30	experimental		mature miRNA	standard	MIMAT0029058	gga-miR-7452-5p
1240	PUC2MM-20B		1	40	31	control	control_spike_calibration	LC Internal Use	control
1241	a2-PUC2PM-20B		1	41	1	control	control_spike_calibration	LC Internal Use	control
1242	gga-miR-122b	AGUGUGACACUGGUGUUUUU	1	41	2	experimental		mature miRNA	standard	MIMAT0007719	gga-miR-122b
1243	gga-miR-1572	GAACCUGACACACGGGCCUGC	1	41	3	experimental		mature miRNA	standard	MIMAT0007432	gga-miR-1572
1244	gga-miR-1658-5p	UAUACCACCCCCAGGAGUUCUGC	1	41	4	experimental		mature miRNA	standard	MIMAT0007538	gga-miR-1658-5p
1245	gga-miR-1742	AAUCGUCGUUCGGGAUCCGC	1	41	5	experimental		mature miRNA	standard	MIMAT0007646	gga-miR-1742
1246	gga-miR-193b-3p	AACUGGCCCACAAAGUCCCGCUUU	1	41	6	experimental		mature miRNA	standard	MIMAT0003353	gga-miR-193b-3p
1247	gga-miR-34b-3p	AAUCACUAAAUUCACUGCCAUC	1	41	7	experimental		mature miRNA	standard	MIMAT0026540	gga-miR-34b-3p
1248	gga-miR-6562-3p	UCAGUCAUUUCUUGCUCUCUGU	1	41	8	experimental		mature miRNA	standard	MIMAT0025833	gga-miR-6562-3p
1249	gga-miR-6645-5p	UGGGAGGUAGCAGUGGUGGUGA	1	41	9	experimental		mature miRNA	standard	MIMAT0025742	gga-miR-6645-5p
1250	gga-miR-7453-3p	CAGCUUUUCUCUCUGGCU	1	41	10	experimental		mature miRNA	standard	MIMAT0029061	gga-miR-7453-3p
1251	a2-PUC2PM-20B		1	41	11	control	control_spike_calibration	LC Internal Use	control
1252	gga-miR-122b	AGUGUGACACUGGUGUUUUU	1	41	12	experimental		mature miRNA	standard	MIMAT0007719	gga-miR-122b
1253	gga-miR-1572	GAACCUGACACACGGGCCUGC	1	41	13	experimental		mature miRNA	standard	MIMAT0007432	gga-miR-1572
1254	gga-miR-1658-5p	UAUACCACCCCCAGGAGUUCUGC	1	41	14	experimental		mature miRNA	standard	MIMAT0007538	gga-miR-1658-5p
1255	gga-miR-1742	AAUCGUCGUUCGGGAUCCGC	1	41	15	experimental		mature miRNA	standard	MIMAT0007646	gga-miR-1742
1256	gga-miR-193b-3p	AACUGGCCCACAAAGUCCCGCUUU	1	41	16	experimental		mature miRNA	standard	MIMAT0003353	gga-miR-193b-3p
1257	gga-miR-34b-3p	AAUCACUAAAUUCACUGCCAUC	1	41	17	experimental		mature miRNA	standard	MIMAT0026540	gga-miR-34b-3p
1258	gga-miR-6562-3p	UCAGUCAUUUCUUGCUCUCUGU	1	41	18	experimental		mature miRNA	standard	MIMAT0025833	gga-miR-6562-3p
1259	gga-miR-6645-5p	UGGGAGGUAGCAGUGGUGGUGA	1	41	19	experimental		mature miRNA	standard	MIMAT0025742	gga-miR-6645-5p
1260	gga-miR-7453-3p	CAGCUUUUCUCUCUGGCU	1	41	20	experimental		mature miRNA	standard	MIMAT0029061	gga-miR-7453-3p
1261	a2-PUC2PM-20B		1	41	21	control	control_spike_calibration	LC Internal Use	control
1262	gga-miR-122b	AGUGUGACACUGGUGUUUUU	1	41	22	experimental		mature miRNA	standard	MIMAT0007719	gga-miR-122b
1263	gga-miR-1572	GAACCUGACACACGGGCCUGC	1	41	23	experimental		mature miRNA	standard	MIMAT0007432	gga-miR-1572
1264	gga-miR-1658-5p	UAUACCACCCCCAGGAGUUCUGC	1	41	24	experimental		mature miRNA	standard	MIMAT0007538	gga-miR-1658-5p
1265	gga-miR-1742	AAUCGUCGUUCGGGAUCCGC	1	41	25	experimental		mature miRNA	standard	MIMAT0007646	gga-miR-1742
1266	gga-miR-193b-3p	AACUGGCCCACAAAGUCCCGCUUU	1	41	26	experimental		mature miRNA	standard	MIMAT0003353	gga-miR-193b-3p
1267	gga-miR-34b-3p	AAUCACUAAAUUCACUGCCAUC	1	41	27	experimental		mature miRNA	standard	MIMAT0026540	gga-miR-34b-3p
1268	gga-miR-6562-3p	UCAGUCAUUUCUUGCUCUCUGU	1	41	28	experimental		mature miRNA	standard	MIMAT0025833	gga-miR-6562-3p
1269	gga-miR-6645-5p	UGGGAGGUAGCAGUGGUGGUGA	1	41	29	experimental		mature miRNA	standard	MIMAT0025742	gga-miR-6645-5p
1270	gga-miR-7453-3p	CAGCUUUUCUCUCUGGCU	1	41	30	experimental		mature miRNA	standard	MIMAT0029061	gga-miR-7453-3p
1271	a2-PUC2PM-20B		1	41	31	control	control_spike_calibration	LC Internal Use	control
1272	a2-PUC2MM-20B		1	42	1	control	control_spike_calibration	LC Internal Use	control
1273	gga-miR-124a-3p	UUAAGGCACGCGGUGAAUGCCA	1	42	2	experimental		mature miRNA	standard	MIMAT0001128	gga-miR-124a-3p
1274	gga-miR-1573	UGUUCUGCAGGUGCCAGUCU	1	42	3	experimental		mature miRNA	standard	MIMAT0007433	gga-miR-1573
1275	gga-miR-1659	UAGGGCAGAAUGAAGGAGUCCCU	1	42	4	experimental		mature miRNA	standard	MIMAT0007540	gga-miR-1659
1276	gga-miR-1743	UGGAAUGCAGCAAUUAUCACCU	1	42	5	experimental		mature miRNA	standard	MIMAT0007647	gga-miR-1743
1277	gga-miR-193b-5p	CGGGGUUUUGGGGGCGAGAUGA	1	42	6	experimental		mature miRNA	standard	MIMAT0026629	gga-miR-193b-5p
1278	gga-miR-34b-5p	CAGGCAGUGUAGUUAGCUGAUUG	1	42	7	experimental		mature miRNA	standard	MIMAT0001179	gga-miR-34b-5p
1279	gga-miR-6562-5p	AGGGGAAAGGAAUGUGCUGUGG	1	42	8	experimental		mature miRNA	standard	MIMAT0025832	gga-miR-6562-5p
1280	gga-miR-6646-3p	UCUGGUGGUAGCAGCUGGAAGG	1	42	9	experimental		mature miRNA	standard	MIMAT0025743	gga-miR-6646-3p
1281	gga-miR-7453-5p	UCAGAUGUGAGAACUCAGCAGCG	1	42	10	experimental		mature miRNA	standard	MIMAT0029060	gga-miR-7453-5p
1282	a2-PUC2MM-20B		1	42	11	control	control_spike_calibration	LC Internal Use	control
1283	gga-miR-124a-3p	UUAAGGCACGCGGUGAAUGCCA	1	42	12	experimental		mature miRNA	standard	MIMAT0001128	gga-miR-124a-3p
1284	gga-miR-1573	UGUUCUGCAGGUGCCAGUCU	1	42	13	experimental		mature miRNA	standard	MIMAT0007433	gga-miR-1573
1285	gga-miR-1659	UAGGGCAGAAUGAAGGAGUCCCU	1	42	14	experimental		mature miRNA	standard	MIMAT0007540	gga-miR-1659
1286	gga-miR-1743	UGGAAUGCAGCAAUUAUCACCU	1	42	15	experimental		mature miRNA	standard	MIMAT0007647	gga-miR-1743
1287	gga-miR-193b-5p	CGGGGUUUUGGGGGCGAGAUGA	1	42	16	experimental		mature miRNA	standard	MIMAT0026629	gga-miR-193b-5p
1288	gga-miR-34b-5p	CAGGCAGUGUAGUUAGCUGAUUG	1	42	17	experimental		mature miRNA	standard	MIMAT0001179	gga-miR-34b-5p
1289	gga-miR-6562-5p	AGGGGAAAGGAAUGUGCUGUGG	1	42	18	experimental		mature miRNA	standard	MIMAT0025832	gga-miR-6562-5p
1290	gga-miR-6646-3p	UCUGGUGGUAGCAGCUGGAAGG	1	42	19	experimental		mature miRNA	standard	MIMAT0025743	gga-miR-6646-3p
1291	gga-miR-7453-5p	UCAGAUGUGAGAACUCAGCAGCG	1	42	20	experimental		mature miRNA	standard	MIMAT0029060	gga-miR-7453-5p
1292	a2-PUC2MM-20B		1	42	21	control	control_spike_calibration	LC Internal Use	control
1293	gga-miR-124a-3p	UUAAGGCACGCGGUGAAUGCCA	1	42	22	experimental		mature miRNA	standard	MIMAT0001128	gga-miR-124a-3p
1294	gga-miR-1573	UGUUCUGCAGGUGCCAGUCU	1	42	23	experimental		mature miRNA	standard	MIMAT0007433	gga-miR-1573
1295	gga-miR-1659	UAGGGCAGAAUGAAGGAGUCCCU	1	42	24	experimental		mature miRNA	standard	MIMAT0007540	gga-miR-1659
1296	gga-miR-1743	UGGAAUGCAGCAAUUAUCACCU	1	42	25	experimental		mature miRNA	standard	MIMAT0007647	gga-miR-1743
1297	gga-miR-193b-5p	CGGGGUUUUGGGGGCGAGAUGA	1	42	26	experimental		mature miRNA	standard	MIMAT0026629	gga-miR-193b-5p
1298	gga-miR-34b-5p	CAGGCAGUGUAGUUAGCUGAUUG	1	42	27	experimental		mature miRNA	standard	MIMAT0001179	gga-miR-34b-5p
1299	gga-miR-6562-5p	AGGGGAAAGGAAUGUGCUGUGG	1	42	28	experimental		mature miRNA	standard	MIMAT0025832	gga-miR-6562-5p
1300	gga-miR-6646-3p	UCUGGUGGUAGCAGCUGGAAGG	1	42	29	experimental		mature miRNA	standard	MIMAT0025743	gga-miR-6646-3p
1301	gga-miR-7453-5p	UCAGAUGUGAGAACUCAGCAGCG	1	42	30	experimental		mature miRNA	standard	MIMAT0029060	gga-miR-7453-5p
1302	a2-PUC2MM-20B		1	42	31	control	control_spike_calibration	LC Internal Use	control
1303	a3-PUC2PM-20B		1	43	1	control	control_spike_calibration	LC Internal Use	control
1304	gga-miR-124a-5p	GUUCACAGCGGACCUUGAU	1	43	2	experimental		mature miRNA	standard	MIMAT0026511	gga-miR-124a-5p
1305	gga-miR-1574-3p	ACAGGAGGAUGUCAGGAAGCUU	1	43	3	experimental		mature miRNA	standard	MIMAT0007435	gga-miR-1574-3p
1306	gga-miR-16-5p	UAGCAGCACGUAAAUAUUGGUG	1	43	4	experimental		mature miRNA	standard	MIMAT0001116	gga-miR-16-5p
1307	gga-miR-1744-3p	ACUUCAACAGGAGCAAGACUGA	1	43	5	experimental		mature miRNA	standard	MIMAT0007649	gga-miR-1744-3p
1308	gga-miR-194	UGUAACAGCAACUCCAUGUGGA	1	43	6	experimental		mature miRNA	standard	MIMAT0001133	gga-miR-194
1309	gga-miR-34c-3p	AAUCACUAACCACACAGCCAGG	1	43	7	experimental		mature miRNA	standard	MIMAT0026541	gga-miR-34c-3p
1310	gga-miR-6563-3p	ACUGGGCACACUGUGACUGGCUAC	1	43	8	experimental		mature miRNA	standard	MIMAT0025835	gga-miR-6563-3p
1311	gga-miR-6647-5p	CGCUCUGGCCAUGUGACGCAGCU	1	43	9	experimental		mature miRNA	standard	MIMAT0025744	gga-miR-6647-5p
1312	gga-miR-7454-3p	ACUUUCCAGCUUGCGAAAGCAGACAG	1	43	10	experimental		mature miRNA	standard	MIMAT0029063	gga-miR-7454-3p
1313	a3-PUC2PM-20B		1	43	11	control	control_spike_calibration	LC Internal Use	control
1314	gga-miR-124a-5p	GUUCACAGCGGACCUUGAU	1	43	12	experimental		mature miRNA	standard	MIMAT0026511	gga-miR-124a-5p
1315	gga-miR-1574-3p	ACAGGAGGAUGUCAGGAAGCUU	1	43	13	experimental		mature miRNA	standard	MIMAT0007435	gga-miR-1574-3p
1316	gga-miR-16-5p	UAGCAGCACGUAAAUAUUGGUG	1	43	14	experimental		mature miRNA	standard	MIMAT0001116	gga-miR-16-5p
1317	gga-miR-1744-3p	ACUUCAACAGGAGCAAGACUGA	1	43	15	experimental		mature miRNA	standard	MIMAT0007649	gga-miR-1744-3p
1318	gga-miR-194	UGUAACAGCAACUCCAUGUGGA	1	43	16	experimental		mature miRNA	standard	MIMAT0001133	gga-miR-194
1319	gga-miR-34c-3p	AAUCACUAACCACACAGCCAGG	1	43	17	experimental		mature miRNA	standard	MIMAT0026541	gga-miR-34c-3p
1320	gga-miR-6563-3p	ACUGGGCACACUGUGACUGGCUAC	1	43	18	experimental		mature miRNA	standard	MIMAT0025835	gga-miR-6563-3p
1321	gga-miR-6647-5p	CGCUCUGGCCAUGUGACGCAGCU	1	43	19	experimental		mature miRNA	standard	MIMAT0025744	gga-miR-6647-5p
1322	gga-miR-7454-3p	ACUUUCCAGCUUGCGAAAGCAGACAG	1	43	20	experimental		mature miRNA	standard	MIMAT0029063	gga-miR-7454-3p
1323	a3-PUC2PM-20B		1	43	21	control	control_spike_calibration	LC Internal Use	control
1324	gga-miR-124a-5p	GUUCACAGCGGACCUUGAU	1	43	22	experimental		mature miRNA	standard	MIMAT0026511	gga-miR-124a-5p
1325	gga-miR-1574-3p	ACAGGAGGAUGUCAGGAAGCUU	1	43	23	experimental		mature miRNA	standard	MIMAT0007435	gga-miR-1574-3p
1326	gga-miR-16-5p	UAGCAGCACGUAAAUAUUGGUG	1	43	24	experimental		mature miRNA	standard	MIMAT0001116	gga-miR-16-5p
1327	gga-miR-1744-3p	ACUUCAACAGGAGCAAGACUGA	1	43	25	experimental		mature miRNA	standard	MIMAT0007649	gga-miR-1744-3p
1328	gga-miR-194	UGUAACAGCAACUCCAUGUGGA	1	43	26	experimental		mature miRNA	standard	MIMAT0001133	gga-miR-194
1329	gga-miR-34c-3p	AAUCACUAACCACACAGCCAGG	1	43	27	experimental		mature miRNA	standard	MIMAT0026541	gga-miR-34c-3p
1330	gga-miR-6563-3p	ACUGGGCACACUGUGACUGGCUAC	1	43	28	experimental		mature miRNA	standard	MIMAT0025835	gga-miR-6563-3p
1331	gga-miR-6647-5p	CGCUCUGGCCAUGUGACGCAGCU	1	43	29	experimental		mature miRNA	standard	MIMAT0025744	gga-miR-6647-5p
1332	gga-miR-7454-3p	ACUUUCCAGCUUGCGAAAGCAGACAG	1	43	30	experimental		mature miRNA	standard	MIMAT0029063	gga-miR-7454-3p
1333	a3-PUC2PM-20B		1	43	31	control	control_spike_calibration	LC Internal Use	control
1334	a3-PUC2MM-20B		1	44	1	control	control_spike_calibration	LC Internal Use	control
1335	gga-miR-124b	UUAAGGCACGCAGUGAAUGCCA	1	44	2	experimental		mature miRNA	standard	MIMAT0001174	gga-miR-124b
1336	gga-miR-1574-5p	CUGUGACUUCUCCUUGUCAGA	1	44	3	experimental		mature miRNA	standard	MIMAT0007434	gga-miR-1574-5p
1337	gga-miR-1660	UAGGCCUGUGUUUUUGUGCAUA	1	44	4	experimental		mature miRNA	standard	MIMAT0007541	gga-miR-1660
1338	gga-miR-1744-5p	UGCUCUGUUGAACUCAAAAGCU	1	44	5	experimental		mature miRNA	standard	MIMAT0007648	gga-miR-1744-5p
1339	gga-miR-196-1-3p	CAAGAACAUCAAACUACCUGAU	1	44	6	experimental		mature miRNA	standard	MIMAT0031017	gga-miR-196-1-3p
1340	gga-miR-34c-5p	AGGCAGUGUAGUUAGCUGAUUGC	1	44	7	experimental		mature miRNA	standard	MIMAT0001180	gga-miR-34c-5p
1341	gga-miR-6563-5p	GUUGGUCGGUUGUGCUUAGAGA	1	44	8	experimental		mature miRNA	standard	MIMAT0025834	gga-miR-6563-5p
1342	gga-miR-6648-3p	UCCGGCAUUCUGAACGCUCCU	1	44	9	experimental		mature miRNA	standard	MIMAT0025747	gga-miR-6648-3p
1343	gga-miR-7454-5p	UUCUGUGAGACAAACUGAAGUGC	1	44	10	experimental		mature miRNA	standard	MIMAT0029062	gga-miR-7454-5p
1344	a3-PUC2MM-20B		1	44	11	control	control_spike_calibration	LC Internal Use	control
1345	gga-miR-124b	UUAAGGCACGCAGUGAAUGCCA	1	44	12	experimental		mature miRNA	standard	MIMAT0001174	gga-miR-124b
1346	gga-miR-1574-5p	CUGUGACUUCUCCUUGUCAGA	1	44	13	experimental		mature miRNA	standard	MIMAT0007434	gga-miR-1574-5p
1347	gga-miR-1660	UAGGCCUGUGUUUUUGUGCAUA	1	44	14	experimental		mature miRNA	standard	MIMAT0007541	gga-miR-1660
1348	gga-miR-1744-5p	UGCUCUGUUGAACUCAAAAGCU	1	44	15	experimental		mature miRNA	standard	MIMAT0007648	gga-miR-1744-5p
1349	gga-miR-196-1-3p	CAAGAACAUCAAACUACCUGAU	1	44	16	experimental		mature miRNA	standard	MIMAT0031017	gga-miR-196-1-3p
1350	gga-miR-34c-5p	AGGCAGUGUAGUUAGCUGAUUGC	1	44	17	experimental		mature miRNA	standard	MIMAT0001180	gga-miR-34c-5p
1351	gga-miR-6563-5p	GUUGGUCGGUUGUGCUUAGAGA	1	44	18	experimental		mature miRNA	standard	MIMAT0025834	gga-miR-6563-5p
1352	gga-miR-6648-3p	UCCGGCAUUCUGAACGCUCCU	1	44	19	experimental		mature miRNA	standard	MIMAT0025747	gga-miR-6648-3p
1353	gga-miR-7454-5p	UUCUGUGAGACAAACUGAAGUGC	1	44	20	experimental		mature miRNA	standard	MIMAT0029062	gga-miR-7454-5p
1354	a3-PUC2MM-20B		1	44	21	control	control_spike_calibration	LC Internal Use	control
1355	gga-miR-124b	UUAAGGCACGCAGUGAAUGCCA	1	44	22	experimental		mature miRNA	standard	MIMAT0001174	gga-miR-124b
1356	gga-miR-1574-5p	CUGUGACUUCUCCUUGUCAGA	1	44	23	experimental		mature miRNA	standard	MIMAT0007434	gga-miR-1574-5p
1357	gga-miR-1660	UAGGCCUGUGUUUUUGUGCAUA	1	44	24	experimental		mature miRNA	standard	MIMAT0007541	gga-miR-1660
1358	gga-miR-1744-5p	UGCUCUGUUGAACUCAAAAGCU	1	44	25	experimental		mature miRNA	standard	MIMAT0007648	gga-miR-1744-5p
1359	gga-miR-196-1-3p	CAAGAACAUCAAACUACCUGAU	1	44	26	experimental		mature miRNA	standard	MIMAT0031017	gga-miR-196-1-3p
1360	gga-miR-34c-5p	AGGCAGUGUAGUUAGCUGAUUGC	1	44	27	experimental		mature miRNA	standard	MIMAT0001180	gga-miR-34c-5p
1361	gga-miR-6563-5p	GUUGGUCGGUUGUGCUUAGAGA	1	44	28	experimental		mature miRNA	standard	MIMAT0025834	gga-miR-6563-5p
1362	gga-miR-6648-3p	UCCGGCAUUCUGAACGCUCCU	1	44	29	experimental		mature miRNA	standard	MIMAT0025747	gga-miR-6648-3p
1363	gga-miR-7454-5p	UUCUGUGAGACAAACUGAAGUGC	1	44	30	experimental		mature miRNA	standard	MIMAT0029062	gga-miR-7454-5p
1364	a3-PUC2MM-20B		1	44	31	control	control_spike_calibration	LC Internal Use	control
1365	a-PUC2PM		1	45	1	control	control_spike_calibration	LC Internal Use	control
1366	gga-miR-124c-3p	UCAAGGUCCGCUGUGAACACGG	1	45	2	experimental		mature miRNA	standard	MIMAT0025600	gga-miR-124c-3p
1367	gga-miR-1575	CUGGCAGCACGUAGGAGCAGG	1	45	3	experimental		mature miRNA	standard	MIMAT0007436	gga-miR-1575
1368	gga-miR-1661	UAGCAGAUGUUUAGGAAUGUGCCU	1	45	4	experimental		mature miRNA	standard	MIMAT0007542	gga-miR-1661
1369	gga-miR-1745	UGCUCUGCUUGGCAAACUGCUC	1	45	5	experimental		mature miRNA	standard	MIMAT0007650	gga-miR-1745
1370	gga-miR-196-2-3p	CUACAGCACGAAACUGCCUUAA	1	45	6	experimental		mature miRNA	standard	MIMAT0026504	gga-miR-196-2-3p
1371	gga-miR-3523	CCGCGCAGUGCCUCGUCCUCGA	1	45	7	experimental		mature miRNA	standard	MIMAT0016373	gga-miR-3523
1372	gga-miR-6564-3p	UGGACGGAGGAAGCGCGGGCAG	1	45	8	experimental		mature miRNA	standard	MIMAT0025634	gga-miR-6564-3p
1373	gga-miR-6648-5p	AGGAGCGUUCAGAAUGCCGGUG	1	45	9	experimental		mature miRNA	standard	MIMAT0025746	gga-miR-6648-5p
1374	gga-miR-7455-3p	CUUCCCUCCGUCGGCGCGCACAC	1	45	10	experimental		mature miRNA	standard	MIMAT0029065	gga-miR-7455-3p
1375	a-PUC2PM		1	45	11	control	control_spike_calibration	LC Internal Use	control
1376	gga-miR-124c-3p	UCAAGGUCCGCUGUGAACACGG	1	45	12	experimental		mature miRNA	standard	MIMAT0025600	gga-miR-124c-3p
1377	gga-miR-1575	CUGGCAGCACGUAGGAGCAGG	1	45	13	experimental		mature miRNA	standard	MIMAT0007436	gga-miR-1575
1378	gga-miR-1661	UAGCAGAUGUUUAGGAAUGUGCCU	1	45	14	experimental		mature miRNA	standard	MIMAT0007542	gga-miR-1661
1379	gga-miR-1745	UGCUCUGCUUGGCAAACUGCUC	1	45	15	experimental		mature miRNA	standard	MIMAT0007650	gga-miR-1745
1380	gga-miR-196-2-3p	CUACAGCACGAAACUGCCUUAA	1	45	16	experimental		mature miRNA	standard	MIMAT0026504	gga-miR-196-2-3p
1381	gga-miR-3523	CCGCGCAGUGCCUCGUCCUCGA	1	45	17	experimental		mature miRNA	standard	MIMAT0016373	gga-miR-3523
1382	gga-miR-6564-3p	UGGACGGAGGAAGCGCGGGCAG	1	45	18	experimental		mature miRNA	standard	MIMAT0025634	gga-miR-6564-3p
1383	gga-miR-6648-5p	AGGAGCGUUCAGAAUGCCGGUG	1	45	19	experimental		mature miRNA	standard	MIMAT0025746	gga-miR-6648-5p
1384	gga-miR-7455-3p	CUUCCCUCCGUCGGCGCGCACAC	1	45	20	experimental		mature miRNA	standard	MIMAT0029065	gga-miR-7455-3p
1385	a-PUC2PM		1	45	21	control	control_spike_calibration	LC Internal Use	control
1386	gga-miR-124c-3p	UCAAGGUCCGCUGUGAACACGG	1	45	22	experimental		mature miRNA	standard	MIMAT0025600	gga-miR-124c-3p
1387	gga-miR-1575	CUGGCAGCACGUAGGAGCAGG	1	45	23	experimental		mature miRNA	standard	MIMAT0007436	gga-miR-1575
1388	gga-miR-1661	UAGCAGAUGUUUAGGAAUGUGCCU	1	45	24	experimental		mature miRNA	standard	MIMAT0007542	gga-miR-1661
1389	gga-miR-1745	UGCUCUGCUUGGCAAACUGCUC	1	45	25	experimental		mature miRNA	standard	MIMAT0007650	gga-miR-1745
1390	gga-miR-196-2-3p	CUACAGCACGAAACUGCCUUAA	1	45	26	experimental		mature miRNA	standard	MIMAT0026504	gga-miR-196-2-3p
1391	gga-miR-3523	CCGCGCAGUGCCUCGUCCUCGA	1	45	27	experimental		mature miRNA	standard	MIMAT0016373	gga-miR-3523
1392	gga-miR-6564-3p	UGGACGGAGGAAGCGCGGGCAG	1	45	28	experimental		mature miRNA	standard	MIMAT0025634	gga-miR-6564-3p
1393	gga-miR-6648-5p	AGGAGCGUUCAGAAUGCCGGUG	1	45	29	experimental		mature miRNA	standard	MIMAT0025746	gga-miR-6648-5p
1394	gga-miR-7455-3p	CUUCCCUCCGUCGGCGCGCACAC	1	45	30	experimental		mature miRNA	standard	MIMAT0029065	gga-miR-7455-3p
1395	a-PUC2PM		1	45	31	control	control_spike_calibration	LC Internal Use	control
1396	a-PUC2MM2d		1	46	1	control	control_spike_calibration	LC Internal Use	control
1397	gga-miR-124c-5p	CAUUCACCGCGUGCCUUAAUU	1	46	2	experimental		mature miRNA	standard	MIMAT0025599	gga-miR-124c-5p
1398	gga-miR-1576	CUCGGGCGGGCGGAGCGGCAC	1	46	3	experimental		mature miRNA	standard	MIMAT0007437	gga-miR-1576
1399	gga-miR-1662	UUGACAUCAUCAUACUUGGGAU	1	46	4	experimental		mature miRNA	standard	MIMAT0007543	gga-miR-1662
1400	gga-miR-1746	CUCAGAGCUGUGGUCCCAUGGU	1	46	5	experimental		mature miRNA	standard	MIMAT0007651	gga-miR-1746
1401	gga-miR-196-5p	UAGGUAGUUUCAUGUUGUUGG	1	46	6	experimental		mature miRNA	standard	MIMAT0001121	gga-miR-196-5p
1402	gga-miR-3524a	CAGAAUCGCAGAAUGGCUGAGG	1	46	7	experimental		mature miRNA	standard	MIMAT0016374	gga-miR-3524a
1403	gga-miR-6564-5p	CGCCGUGCUUUCUCCCGCCGU	1	46	8	experimental		mature miRNA	standard	MIMAT0025633	gga-miR-6564-5p
1404	gga-miR-6649-3p	UGCUGGCAGUGCUGUGGUAGUG	1	46	9	experimental		mature miRNA	standard	MIMAT0025749	gga-miR-6649-3p
1405	gga-miR-7455-5p	UCGCGCGGCGCGGAGGGAGCGGG	1	46	10	experimental		mature miRNA	standard	MIMAT0029064	gga-miR-7455-5p
1406	a-PUC2MM2d		1	46	11	control	control_spike_calibration	LC Internal Use	control
1407	gga-miR-124c-5p	CAUUCACCGCGUGCCUUAAUU	1	46	12	experimental		mature miRNA	standard	MIMAT0025599	gga-miR-124c-5p
1408	gga-miR-1576	CUCGGGCGGGCGGAGCGGCAC	1	46	13	experimental		mature miRNA	standard	MIMAT0007437	gga-miR-1576
1409	gga-miR-1662	UUGACAUCAUCAUACUUGGGAU	1	46	14	experimental		mature miRNA	standard	MIMAT0007543	gga-miR-1662
1410	gga-miR-1746	CUCAGAGCUGUGGUCCCAUGGU	1	46	15	experimental		mature miRNA	standard	MIMAT0007651	gga-miR-1746
1411	gga-miR-196-5p	UAGGUAGUUUCAUGUUGUUGG	1	46	16	experimental		mature miRNA	standard	MIMAT0001121	gga-miR-196-5p
1412	gga-miR-3524a	CAGAAUCGCAGAAUGGCUGAGG	1	46	17	experimental		mature miRNA	standard	MIMAT0016374	gga-miR-3524a
1413	gga-miR-6564-5p	CGCCGUGCUUUCUCCCGCCGU	1	46	18	experimental		mature miRNA	standard	MIMAT0025633	gga-miR-6564-5p
1414	gga-miR-6649-3p	UGCUGGCAGUGCUGUGGUAGUG	1	46	19	experimental		mature miRNA	standard	MIMAT0025749	gga-miR-6649-3p
1415	gga-miR-7455-5p	UCGCGCGGCGCGGAGGGAGCGGG	1	46	20	experimental		mature miRNA	standard	MIMAT0029064	gga-miR-7455-5p
1416	a-PUC2MM2d		1	46	21	control	control_spike_calibration	LC Internal Use	control
1417	gga-miR-124c-5p	CAUUCACCGCGUGCCUUAAUU	1	46	22	experimental		mature miRNA	standard	MIMAT0025599	gga-miR-124c-5p
1418	gga-miR-1576	CUCGGGCGGGCGGAGCGGCAC	1	46	23	experimental		mature miRNA	standard	MIMAT0007437	gga-miR-1576
1419	gga-miR-1662	UUGACAUCAUCAUACUUGGGAU	1	46	24	experimental		mature miRNA	standard	MIMAT0007543	gga-miR-1662
1420	gga-miR-1746	CUCAGAGCUGUGGUCCCAUGGU	1	46	25	experimental		mature miRNA	standard	MIMAT0007651	gga-miR-1746
1421	gga-miR-196-5p	UAGGUAGUUUCAUGUUGUUGG	1	46	26	experimental		mature miRNA	standard	MIMAT0001121	gga-miR-196-5p
1422	gga-miR-3524a	CAGAAUCGCAGAAUGGCUGAGG	1	46	27	experimental		mature miRNA	standard	MIMAT0016374	gga-miR-3524a
1423	gga-miR-6564-5p	CGCCGUGCUUUCUCCCGCCGU	1	46	28	experimental		mature miRNA	standard	MIMAT0025633	gga-miR-6564-5p
1424	gga-miR-6649-3p	UGCUGGCAGUGCUGUGGUAGUG	1	46	29	experimental		mature miRNA	standard	MIMAT0025749	gga-miR-6649-3p
1425	gga-miR-7455-5p	UCGCGCGGCGCGGAGGGAGCGGG	1	46	30	experimental		mature miRNA	standard	MIMAT0029064	gga-miR-7455-5p
1426	a-PUC2MM2d		1	46	31	control	control_spike_calibration	LC Internal Use	control
1427	Ctr01-3P		1	47	1	control	control_spike_calibration	LC Internal Use	control
1428	gga-miR-125b-3p	ACAAGUCAGGCUCUUGGGACCU	1	47	2	experimental		mature miRNA	standard	MIMAT0026493	gga-miR-125b-3p
1429	gga-miR-1577	CUCAGGGGUGGAAGUAGGAGAA	1	47	3	experimental		mature miRNA	standard	MIMAT0007438	gga-miR-1577
1430	gga-miR-1663-3p	UGGCAUCCAGAACAGCGGUAC	1	47	4	experimental		mature miRNA	standard	MIMAT0007545	gga-miR-1663-3p
1431	gga-miR-1747-3p	CCUGAAUCCCUUCAAGUGGACA	1	47	5	experimental		mature miRNA	standard	MIMAT0026781	gga-miR-1747-3p
1432	gga-miR-199-3p	UACAGUAGUCUGCACAUUGG	1	47	6	experimental		mature miRNA	standard	MIMAT0003721	gga-miR-199-3p
1433	gga-miR-3524b-3p	CACAGAAUUGUGGGAUGGCUG	1	47	7	experimental		mature miRNA	standard	MIMAT0025753	gga-miR-3524b-3p
1434	gga-miR-6565-3p	UCUGUGCUUGUGUACUCAUAG	1	47	8	experimental		mature miRNA	standard	MIMAT0025636	gga-miR-6565-3p
1435	gga-miR-6649-5p	UUUAUCACAUCAAUGCCAAGCAG	1	47	9	experimental		mature miRNA	standard	MIMAT0025748	gga-miR-6649-5p
1436	gga-miR-7456-3p	CAGGGAGAUGUACCUGUAGGAG	1	47	10	experimental		mature miRNA	standard	MIMAT0029067	gga-miR-7456-3p
1437	Ctr01-3P		1	47	11	control	control_spike_calibration	LC Internal Use	control
1438	gga-miR-125b-3p	ACAAGUCAGGCUCUUGGGACCU	1	47	12	experimental		mature miRNA	standard	MIMAT0026493	gga-miR-125b-3p
1439	gga-miR-1577	CUCAGGGGUGGAAGUAGGAGAA	1	47	13	experimental		mature miRNA	standard	MIMAT0007438	gga-miR-1577
1440	gga-miR-1663-3p	UGGCAUCCAGAACAGCGGUAC	1	47	14	experimental		mature miRNA	standard	MIMAT0007545	gga-miR-1663-3p
1441	gga-miR-1747-3p	CCUGAAUCCCUUCAAGUGGACA	1	47	15	experimental		mature miRNA	standard	MIMAT0026781	gga-miR-1747-3p
1442	gga-miR-199-3p	UACAGUAGUCUGCACAUUGG	1	47	16	experimental		mature miRNA	standard	MIMAT0003721	gga-miR-199-3p
1443	gga-miR-3524b-3p	CACAGAAUUGUGGGAUGGCUG	1	47	17	experimental		mature miRNA	standard	MIMAT0025753	gga-miR-3524b-3p
1444	gga-miR-6565-3p	UCUGUGCUUGUGUACUCAUAG	1	47	18	experimental		mature miRNA	standard	MIMAT0025636	gga-miR-6565-3p
1445	gga-miR-6649-5p	UUUAUCACAUCAAUGCCAAGCAG	1	47	19	experimental		mature miRNA	standard	MIMAT0025748	gga-miR-6649-5p
1446	gga-miR-7456-3p	CAGGGAGAUGUACCUGUAGGAG	1	47	20	experimental		mature miRNA	standard	MIMAT0029067	gga-miR-7456-3p
1447	Ctr01-3P		1	47	21	control	control_spike_calibration	LC Internal Use	control
1448	gga-miR-125b-3p	ACAAGUCAGGCUCUUGGGACCU	1	47	22	experimental		mature miRNA	standard	MIMAT0026493	gga-miR-125b-3p
1449	gga-miR-1577	CUCAGGGGUGGAAGUAGGAGAA	1	47	23	experimental		mature miRNA	standard	MIMAT0007438	gga-miR-1577
1450	gga-miR-1663-3p	UGGCAUCCAGAACAGCGGUAC	1	47	24	experimental		mature miRNA	standard	MIMAT0007545	gga-miR-1663-3p
1451	gga-miR-1747-3p	CCUGAAUCCCUUCAAGUGGACA	1	47	25	experimental		mature miRNA	standard	MIMAT0026781	gga-miR-1747-3p
1452	gga-miR-199-3p	UACAGUAGUCUGCACAUUGG	1	47	26	experimental		mature miRNA	standard	MIMAT0003721	gga-miR-199-3p
1453	gga-miR-3524b-3p	CACAGAAUUGUGGGAUGGCUG	1	47	27	experimental		mature miRNA	standard	MIMAT0025753	gga-miR-3524b-3p
1454	gga-miR-6565-3p	UCUGUGCUUGUGUACUCAUAG	1	47	28	experimental		mature miRNA	standard	MIMAT0025636	gga-miR-6565-3p
1455	gga-miR-6649-5p	UUUAUCACAUCAAUGCCAAGCAG	1	47	29	experimental		mature miRNA	standard	MIMAT0025748	gga-miR-6649-5p
1456	gga-miR-7456-3p	CAGGGAGAUGUACCUGUAGGAG	1	47	30	experimental		mature miRNA	standard	MIMAT0029067	gga-miR-7456-3p
1457	Ctr01-3P		1	47	31	control	control_spike_calibration	LC Internal Use	control
1458	Ctr01-3M05		1	48	1	control	control_spike_calibration	LC Internal Use	control
1459	gga-miR-125b-5p	UCCCUGAGACCCUAACUUGUGA	1	48	2	experimental		mature miRNA	standard	MIMAT0001105	gga-miR-125b-5p
1460	gga-miR-1578	UGUGCCGUUCUGACACAGCUCU	1	48	3	experimental		mature miRNA	standard	MIMAT0007439	gga-miR-1578
1461	gga-miR-1663-5p	UACCACUGUCCUGGGUGCCU	1	48	4	experimental		mature miRNA	standard	MIMAT0007544	gga-miR-1663-5p
1462	gga-miR-1747-5p	UGCACUUGAAUGGAGUUCUGGG	1	48	5	experimental		mature miRNA	standard	MIMAT0007652	gga-miR-1747-5p
1463	gga-miR-199-5p	CCCAGUGUUCAGACUACCUGUUC	1	48	6	experimental		mature miRNA	standard	MIMAT0001152	gga-miR-199-5p
1464	gga-miR-3525	CAGCCAUUCUGCGAUUCUGUGA	1	48	7	experimental		mature miRNA	standard	MIMAT0016382	gga-miR-3525
1465	gga-miR-6565-5p	AUGAGAUAGCAAAGCACACUUC	1	48	8	experimental		mature miRNA	standard	MIMAT0025635	gga-miR-6565-5p
1466	gga-miR-6650-5p	AGCCAGCAGAAGAGCAACUGGGCA	1	48	9	experimental		mature miRNA	standard	MIMAT0025750	gga-miR-6650-5p
1467	gga-miR-7456-5p	CCUGCAGCUGCAUUUUCCCUAUG	1	48	10	experimental		mature miRNA	standard	MIMAT0029066	gga-miR-7456-5p
1468	Ctr01-3M05		1	48	11	control	control_spike_calibration	LC Internal Use	control
1469	gga-miR-125b-5p	UCCCUGAGACCCUAACUUGUGA	1	48	12	experimental		mature miRNA	standard	MIMAT0001105	gga-miR-125b-5p
1470	gga-miR-1578	UGUGCCGUUCUGACACAGCUCU	1	48	13	experimental		mature miRNA	standard	MIMAT0007439	gga-miR-1578
1471	gga-miR-1663-5p	UACCACUGUCCUGGGUGCCU	1	48	14	experimental		mature miRNA	standard	MIMAT0007544	gga-miR-1663-5p
1472	gga-miR-1747-5p	UGCACUUGAAUGGAGUUCUGGG	1	48	15	experimental		mature miRNA	standard	MIMAT0007652	gga-miR-1747-5p
1473	gga-miR-199-5p	CCCAGUGUUCAGACUACCUGUUC	1	48	16	experimental		mature miRNA	standard	MIMAT0001152	gga-miR-199-5p
1474	gga-miR-3525	CAGCCAUUCUGCGAUUCUGUGA	1	48	17	experimental		mature miRNA	standard	MIMAT0016382	gga-miR-3525
1475	gga-miR-6565-5p	AUGAGAUAGCAAAGCACACUUC	1	48	18	experimental		mature miRNA	standard	MIMAT0025635	gga-miR-6565-5p
1476	gga-miR-6650-5p	AGCCAGCAGAAGAGCAACUGGGCA	1	48	19	experimental		mature miRNA	standard	MIMAT0025750	gga-miR-6650-5p
1477	gga-miR-7456-5p	CCUGCAGCUGCAUUUUCCCUAUG	1	48	20	experimental		mature miRNA	standard	MIMAT0029066	gga-miR-7456-5p
1478	Ctr01-3M05		1	48	21	control	control_spike_calibration	LC Internal Use	control
1479	gga-miR-125b-5p	UCCCUGAGACCCUAACUUGUGA	1	48	22	experimental		mature miRNA	standard	MIMAT0001105	gga-miR-125b-5p
1480	gga-miR-1578	UGUGCCGUUCUGACACAGCUCU	1	48	23	experimental		mature miRNA	standard	MIMAT0007439	gga-miR-1578
1481	gga-miR-1663-5p	UACCACUGUCCUGGGUGCCU	1	48	24	experimental		mature miRNA	standard	MIMAT0007544	gga-miR-1663-5p
1482	gga-miR-1747-5p	UGCACUUGAAUGGAGUUCUGGG	1	48	25	experimental		mature miRNA	standard	MIMAT0007652	gga-miR-1747-5p
1483	gga-miR-199-5p	CCCAGUGUUCAGACUACCUGUUC	1	48	26	experimental		mature miRNA	standard	MIMAT0001152	gga-miR-199-5p
1484	gga-miR-3525	CAGCCAUUCUGCGAUUCUGUGA	1	48	27	experimental		mature miRNA	standard	MIMAT0016382	gga-miR-3525
1485	gga-miR-6565-5p	AUGAGAUAGCAAAGCACACUUC	1	48	28	experimental		mature miRNA	standard	MIMAT0025635	gga-miR-6565-5p
1486	gga-miR-6650-5p	AGCCAGCAGAAGAGCAACUGGGCA	1	48	29	experimental		mature miRNA	standard	MIMAT0025750	gga-miR-6650-5p
1487	gga-miR-7456-5p	CCUGCAGCUGCAUUUUCCCUAUG	1	48	30	experimental		mature miRNA	standard	MIMAT0029066	gga-miR-7456-5p
1488	Ctr01-3M05		1	48	31	control	control_spike_calibration	LC Internal Use	control
1489	Ctr01-3M10		1	49	1	control	control_spike_calibration	LC Internal Use	control
1490	gga-miR-126-3p	UCGUACCGUGAGUAAUAAUGCGC	1	49	2	experimental		mature miRNA	standard	MIMAT0001169	gga-miR-126-3p
1491	gga-miR-1579	CGUGGCGGGAAGGGAUGGGCG	1	49	3	experimental		mature miRNA	standard	MIMAT0007440	gga-miR-1579
1492	gga-miR-1664-3p	UCUGUGACCUCAUUUACCUCC	1	49	4	experimental		mature miRNA	standard	MIMAT0007547	gga-miR-1664-3p
1493	gga-miR-1748	ACUGAGGUCUGGGUGCAGCUGA	1	49	5	experimental		mature miRNA	standard	MIMAT0007653	gga-miR-1748
1494	gga-miR-199b	CAGUAGUCUGCACAUUUGGU	1	49	6	experimental		mature miRNA	standard	MIMAT0007583	gga-miR-199b
1495	gga-miR-3526	UUGAAGAUGAAGUUGGUGU	1	49	7	experimental		mature miRNA	standard	MIMAT0016375	gga-miR-3526
1496	gga-miR-6566-3p	CAGCAGGCCAUGGGGUCGCAG	1	49	8	experimental		mature miRNA	standard	MIMAT0025638	gga-miR-6566-3p
1497	gga-miR-6651-5p	ACCAGGUUGCCUAAGGAGGGG	1	49	9	experimental		mature miRNA	standard	MIMAT0025751	gga-miR-6651-5p
1498	gga-miR-7457-3p	ACUUGGAGGCCUGUGGCUAG	1	49	10	experimental		mature miRNA	standard	MIMAT0029069	gga-miR-7457-3p
1499	Ctr01-3M10		1	49	11	control	control_spike_calibration	LC Internal Use	control
1500	gga-miR-126-3p	UCGUACCGUGAGUAAUAAUGCGC	1	49	12	experimental		mature miRNA	standard	MIMAT0001169	gga-miR-126-3p
1501	gga-miR-1579	CGUGGCGGGAAGGGAUGGGCG	1	49	13	experimental		mature miRNA	standard	MIMAT0007440	gga-miR-1579
1502	gga-miR-1664-3p	UCUGUGACCUCAUUUACCUCC	1	49	14	experimental		mature miRNA	standard	MIMAT0007547	gga-miR-1664-3p
1503	gga-miR-1748	ACUGAGGUCUGGGUGCAGCUGA	1	49	15	experimental		mature miRNA	standard	MIMAT0007653	gga-miR-1748
1504	gga-miR-199b	CAGUAGUCUGCACAUUUGGU	1	49	16	experimental		mature miRNA	standard	MIMAT0007583	gga-miR-199b
1505	gga-miR-3526	UUGAAGAUGAAGUUGGUGU	1	49	17	experimental		mature miRNA	standard	MIMAT0016375	gga-miR-3526
1506	gga-miR-6566-3p	CAGCAGGCCAUGGGGUCGCAG	1	49	18	experimental		mature miRNA	standard	MIMAT0025638	gga-miR-6566-3p
1507	gga-miR-6651-5p	ACCAGGUUGCCUAAGGAGGGG	1	49	19	experimental		mature miRNA	standard	MIMAT0025751	gga-miR-6651-5p
1508	gga-miR-7457-3p	ACUUGGAGGCCUGUGGCUAG	1	49	20	experimental		mature miRNA	standard	MIMAT0029069	gga-miR-7457-3p
1509	Ctr01-3M10		1	49	21	control	control_spike_calibration	LC Internal Use	control
1510	gga-miR-126-3p	UCGUACCGUGAGUAAUAAUGCGC	1	49	22	experimental		mature miRNA	standard	MIMAT0001169	gga-miR-126-3p
1511	gga-miR-1579	CGUGGCGGGAAGGGAUGGGCG	1	49	23	experimental		mature miRNA	standard	MIMAT0007440	gga-miR-1579
1512	gga-miR-1664-3p	UCUGUGACCUCAUUUACCUCC	1	49	24	experimental		mature miRNA	standard	MIMAT0007547	gga-miR-1664-3p
1513	gga-miR-1748	ACUGAGGUCUGGGUGCAGCUGA	1	49	25	experimental		mature miRNA	standard	MIMAT0007653	gga-miR-1748
1514	gga-miR-199b	CAGUAGUCUGCACAUUUGGU	1	49	26	experimental		mature miRNA	standard	MIMAT0007583	gga-miR-199b
1515	gga-miR-3526	UUGAAGAUGAAGUUGGUGU	1	49	27	experimental		mature miRNA	standard	MIMAT0016375	gga-miR-3526
1516	gga-miR-6566-3p	CAGCAGGCCAUGGGGUCGCAG	1	49	28	experimental		mature miRNA	standard	MIMAT0025638	gga-miR-6566-3p
1517	gga-miR-6651-5p	ACCAGGUUGCCUAAGGAGGGG	1	49	29	experimental		mature miRNA	standard	MIMAT0025751	gga-miR-6651-5p
1518	gga-miR-7457-3p	ACUUGGAGGCCUGUGGCUAG	1	49	30	experimental		mature miRNA	standard	MIMAT0029069	gga-miR-7457-3p
1519	Ctr01-3M10		1	49	31	control	control_spike_calibration	LC Internal Use	control
1520	Ctr02-3P		1	50	1	control	control_spike_calibration	LC Internal Use	control
1521	gga-miR-126-5p	CAUUAUUACUUUUGGUACGCG	1	50	2	experimental		mature miRNA	standard	MIMAT0003723	gga-miR-126-5p
1522	gga-miR-1580	CGGCUUCUCGGUACCUGCGUU	1	50	3	experimental		mature miRNA	standard	MIMAT0007441	gga-miR-1580
1523	gga-miR-1664-5p	CCAGACAGGGAGAGAACAGG	1	50	4	experimental		mature miRNA	standard	MIMAT0007546	gga-miR-1664-5p
1524	gga-miR-1749-3p	UUGGCUCUGUUCCCUAUUUCC	1	50	5	experimental		mature miRNA	standard	MIMAT0007655	gga-miR-1749-3p
1525	gga-miR-19a-3p	UGUGCAAAUCUAUGCAAAACUGA	1	50	6	experimental		mature miRNA	standard	MIMAT0001112	gga-miR-19a-3p
1526	gga-miR-3528	CAUGCCCCAGUCGUGUUGCAGA	1	50	7	experimental		mature miRNA	standard	MIMAT0016377	gga-miR-3528
1527	gga-miR-6566-5p	GAGGCCCGAUGUGUCAUUCCU	1	50	8	experimental		mature miRNA	standard	MIMAT0025637	gga-miR-6566-5p
1528	gga-miR-6652-5p	UGGGUGUAUGUGGGACAGCUC	1	50	9	experimental		mature miRNA	standard	MIMAT0025752	gga-miR-6652-5p
1529	gga-miR-7457-5p	GGCAUUCAUAGGGCUGUGAUCGG	1	50	10	experimental		mature miRNA	standard	MIMAT0029068	gga-miR-7457-5p
1530	Ctr02-3P		1	50	11	control	control_spike_calibration	LC Internal Use	control
1531	gga-miR-126-5p	CAUUAUUACUUUUGGUACGCG	1	50	12	experimental		mature miRNA	standard	MIMAT0003723	gga-miR-126-5p
1532	gga-miR-1580	CGGCUUCUCGGUACCUGCGUU	1	50	13	experimental		mature miRNA	standard	MIMAT0007441	gga-miR-1580
1533	gga-miR-1664-5p	CCAGACAGGGAGAGAACAGG	1	50	14	experimental		mature miRNA	standard	MIMAT0007546	gga-miR-1664-5p
1534	gga-miR-1749-3p	UUGGCUCUGUUCCCUAUUUCC	1	50	15	experimental		mature miRNA	standard	MIMAT0007655	gga-miR-1749-3p
1535	gga-miR-19a-3p	UGUGCAAAUCUAUGCAAAACUGA	1	50	16	experimental		mature miRNA	standard	MIMAT0001112	gga-miR-19a-3p
1536	gga-miR-3528	CAUGCCCCAGUCGUGUUGCAGA	1	50	17	experimental		mature miRNA	standard	MIMAT0016377	gga-miR-3528
1537	gga-miR-6566-5p	GAGGCCCGAUGUGUCAUUCCU	1	50	18	experimental		mature miRNA	standard	MIMAT0025637	gga-miR-6566-5p
1538	gga-miR-6652-5p	UGGGUGUAUGUGGGACAGCUC	1	50	19	experimental		mature miRNA	standard	MIMAT0025752	gga-miR-6652-5p
1539	gga-miR-7457-5p	GGCAUUCAUAGGGCUGUGAUCGG	1	50	20	experimental		mature miRNA	standard	MIMAT0029068	gga-miR-7457-5p
1540	Ctr02-3P		1	50	21	control	control_spike_calibration	LC Internal Use	control
1541	gga-miR-126-5p	CAUUAUUACUUUUGGUACGCG	1	50	22	experimental		mature miRNA	standard	MIMAT0003723	gga-miR-126-5p
1542	gga-miR-1580	CGGCUUCUCGGUACCUGCGUU	1	50	23	experimental		mature miRNA	standard	MIMAT0007441	gga-miR-1580
1543	gga-miR-1664-5p	CCAGACAGGGAGAGAACAGG	1	50	24	experimental		mature miRNA	standard	MIMAT0007546	gga-miR-1664-5p
1544	gga-miR-1749-3p	UUGGCUCUGUUCCCUAUUUCC	1	50	25	experimental		mature miRNA	standard	MIMAT0007655	gga-miR-1749-3p
1545	gga-miR-19a-3p	UGUGCAAAUCUAUGCAAAACUGA	1	50	26	experimental		mature miRNA	standard	MIMAT0001112	gga-miR-19a-3p
1546	gga-miR-3528	CAUGCCCCAGUCGUGUUGCAGA	1	50	27	experimental		mature miRNA	standard	MIMAT0016377	gga-miR-3528
1547	gga-miR-6566-5p	GAGGCCCGAUGUGUCAUUCCU	1	50	28	experimental		mature miRNA	standard	MIMAT0025637	gga-miR-6566-5p
1548	gga-miR-6652-5p	UGGGUGUAUGUGGGACAGCUC	1	50	29	experimental		mature miRNA	standard	MIMAT0025752	gga-miR-6652-5p
1549	gga-miR-7457-5p	GGCAUUCAUAGGGCUGUGAUCGG	1	50	30	experimental		mature miRNA	standard	MIMAT0029068	gga-miR-7457-5p
1550	Ctr02-3P		1	50	31	control	control_spike_calibration	LC Internal Use	control
1551	Ctr02-3M05		1	51	1	control	control_spike_calibration	LC Internal Use	control
1552	gga-miR-128-1-5p	CGGGGCCGUAACACUGUCUGAGA	1	51	2	experimental		mature miRNA	standard	MIMAT0031096	gga-miR-128-1-5p
1553	gga-miR-1581	CGAGCCGAAGGGGUGGGCGCUGC	1	51	3	experimental		mature miRNA	standard	MIMAT0007442	gga-miR-1581
1554	gga-miR-1665	UAAGGCCCAGGAGCGCUGCAGC	1	51	4	experimental		mature miRNA	standard	MIMAT0007548	gga-miR-1665
1555	gga-miR-1749-5p	AGAUAAGGAACUGAACUGGCU	1	51	5	experimental		mature miRNA	standard	MIMAT0007654	gga-miR-1749-5p
1556	gga-miR-19a-5p	AGUUUUGCAUAGUUGCACUAC	1	51	6	experimental		mature miRNA	standard	MIMAT0026498	gga-miR-19a-5p
1557	gga-miR-3529	AGGCAGACUGUGACUUGUUGU	1	51	7	experimental		mature miRNA	standard	MIMAT0016378	gga-miR-3529
1558	gga-miR-6567-3p	GGCAGCGCGGAGCGGAGCUUU	1	51	8	experimental		mature miRNA	standard	MIMAT0025640	gga-miR-6567-3p
1559	gga-miR-6653-3p	CGCGGGAUGCAGAGCAGGCGC	1	51	9	experimental		mature miRNA	standard	MIMAT0025754	gga-miR-6653-3p
1560	gga-miR-7458-3p	CACUGGGAUCAUCUCAGCAGAG	1	51	10	experimental		mature miRNA	standard	MIMAT0029071	gga-miR-7458-3p
1561	Ctr02-3M05		1	51	11	control	control_spike_calibration	LC Internal Use	control
1562	gga-miR-128-1-5p	CGGGGCCGUAACACUGUCUGAGA	1	51	12	experimental		mature miRNA	standard	MIMAT0031096	gga-miR-128-1-5p
1563	gga-miR-1581	CGAGCCGAAGGGGUGGGCGCUGC	1	51	13	experimental		mature miRNA	standard	MIMAT0007442	gga-miR-1581
1564	gga-miR-1665	UAAGGCCCAGGAGCGCUGCAGC	1	51	14	experimental		mature miRNA	standard	MIMAT0007548	gga-miR-1665
1565	gga-miR-1749-5p	AGAUAAGGAACUGAACUGGCU	1	51	15	experimental		mature miRNA	standard	MIMAT0007654	gga-miR-1749-5p
1566	gga-miR-19a-5p	AGUUUUGCAUAGUUGCACUAC	1	51	16	experimental		mature miRNA	standard	MIMAT0026498	gga-miR-19a-5p
1567	gga-miR-3529	AGGCAGACUGUGACUUGUUGU	1	51	17	experimental		mature miRNA	standard	MIMAT0016378	gga-miR-3529
1568	gga-miR-6567-3p	GGCAGCGCGGAGCGGAGCUUU	1	51	18	experimental		mature miRNA	standard	MIMAT0025640	gga-miR-6567-3p
1569	gga-miR-6653-3p	CGCGGGAUGCAGAGCAGGCGC	1	51	19	experimental		mature miRNA	standard	MIMAT0025754	gga-miR-6653-3p
1570	gga-miR-7458-3p	CACUGGGAUCAUCUCAGCAGAG	1	51	20	experimental		mature miRNA	standard	MIMAT0029071	gga-miR-7458-3p
1571	Ctr02-3M05		1	51	21	control	control_spike_calibration	LC Internal Use	control
1572	gga-miR-128-1-5p	CGGGGCCGUAACACUGUCUGAGA	1	51	22	experimental		mature miRNA	standard	MIMAT0031096	gga-miR-128-1-5p
1573	gga-miR-1581	CGAGCCGAAGGGGUGGGCGCUGC	1	51	23	experimental		mature miRNA	standard	MIMAT0007442	gga-miR-1581
1574	gga-miR-1665	UAAGGCCCAGGAGCGCUGCAGC	1	51	24	experimental		mature miRNA	standard	MIMAT0007548	gga-miR-1665
1575	gga-miR-1749-5p	AGAUAAGGAACUGAACUGGCU	1	51	25	experimental		mature miRNA	standard	MIMAT0007654	gga-miR-1749-5p
1576	gga-miR-19a-5p	AGUUUUGCAUAGUUGCACUAC	1	51	26	experimental		mature miRNA	standard	MIMAT0026498	gga-miR-19a-5p
1577	gga-miR-3529	AGGCAGACUGUGACUUGUUGU	1	51	27	experimental		mature miRNA	standard	MIMAT0016378	gga-miR-3529
1578	gga-miR-6567-3p	GGCAGCGCGGAGCGGAGCUUU	1	51	28	experimental		mature miRNA	standard	MIMAT0025640	gga-miR-6567-3p
1579	gga-miR-6653-3p	CGCGGGAUGCAGAGCAGGCGC	1	51	29	experimental		mature miRNA	standard	MIMAT0025754	gga-miR-6653-3p
1580	gga-miR-7458-3p	CACUGGGAUCAUCUCAGCAGAG	1	51	30	experimental		mature miRNA	standard	MIMAT0029071	gga-miR-7458-3p
1581	Ctr02-3M05		1	51	31	control	control_spike_calibration	LC Internal Use	control
1582	Ctr02-3M10		1	52	1	control	control_spike_calibration	LC Internal Use	control
1583	gga-miR-128-2-5p	GGGGGCCGUUACACUGUAAGAGA	1	52	2	experimental		mature miRNA	standard	MIMAT0026506	gga-miR-128-2-5p
1584	gga-miR-1582	GAAAGAGAGCCAGAACACAG	1	52	3	experimental		mature miRNA	standard	MIMAT0007443	gga-miR-1582
1585	gga-miR-1666	UAACGCCACGGGGCUGAGGCUG	1	52	4	experimental		mature miRNA	standard	MIMAT0007549	gga-miR-1666
1586	gga-miR-1750	UGAGGACCAAGUGCAUCACUGC	1	52	5	experimental		mature miRNA	standard	MIMAT0007657	gga-miR-1750
1587	gga-miR-19b-3p	UGUGCAAAUCCAUGCAAAACUGA	1	52	6	experimental		mature miRNA	standard	MIMAT0001110	gga-miR-19b-3p
1588	gga-miR-3530-3p	CAAUGGUGUGAGCUGGGAUGG	1	52	7	experimental		mature miRNA	standard	MIMAT0016379	gga-miR-3530-3p
1589	gga-miR-6567-5p	AGCUCCGAACUCGCGGUGCCCG	1	52	8	experimental		mature miRNA	standard	MIMAT0025639	gga-miR-6567-5p
1590	gga-miR-6654-3p	UCAGCACUGGGGCUGAGCUGGCA	1	52	9	experimental		mature miRNA	standard	MIMAT0025755	gga-miR-6654-3p
1591	gga-miR-7458-5p	UUGCGGAACAAGUUCUCAGGGC	1	52	10	experimental		mature miRNA	standard	MIMAT0029070	gga-miR-7458-5p
1592	Ctr02-3M10		1	52	11	control	control_spike_calibration	LC Internal Use	control
1593	gga-miR-128-2-5p	GGGGGCCGUUACACUGUAAGAGA	1	52	12	experimental		mature miRNA	standard	MIMAT0026506	gga-miR-128-2-5p
1594	gga-miR-1582	GAAAGAGAGCCAGAACACAG	1	52	13	experimental		mature miRNA	standard	MIMAT0007443	gga-miR-1582
1595	gga-miR-1666	UAACGCCACGGGGCUGAGGCUG	1	52	14	experimental		mature miRNA	standard	MIMAT0007549	gga-miR-1666
1596	gga-miR-1750	UGAGGACCAAGUGCAUCACUGC	1	52	15	experimental		mature miRNA	standard	MIMAT0007657	gga-miR-1750
1597	gga-miR-19b-3p	UGUGCAAAUCCAUGCAAAACUGA	1	52	16	experimental		mature miRNA	standard	MIMAT0001110	gga-miR-19b-3p
1598	gga-miR-3530-3p	CAAUGGUGUGAGCUGGGAUGG	1	52	17	experimental		mature miRNA	standard	MIMAT0016379	gga-miR-3530-3p
1599	gga-miR-6567-5p	AGCUCCGAACUCGCGGUGCCCG	1	52	18	experimental		mature miRNA	standard	MIMAT0025639	gga-miR-6567-5p
1600	gga-miR-6654-3p	UCAGCACUGGGGCUGAGCUGGCA	1	52	19	experimental		mature miRNA	standard	MIMAT0025755	gga-miR-6654-3p
1601	gga-miR-7458-5p	UUGCGGAACAAGUUCUCAGGGC	1	52	20	experimental		mature miRNA	standard	MIMAT0029070	gga-miR-7458-5p
1602	Ctr02-3M10		1	52	21	control	control_spike_calibration	LC Internal Use	control
1603	gga-miR-128-2-5p	GGGGGCCGUUACACUGUAAGAGA	1	52	22	experimental		mature miRNA	standard	MIMAT0026506	gga-miR-128-2-5p
1604	gga-miR-1582	GAAAGAGAGCCAGAACACAG	1	52	23	experimental		mature miRNA	standard	MIMAT0007443	gga-miR-1582
1605	gga-miR-1666	UAACGCCACGGGGCUGAGGCUG	1	52	24	experimental		mature miRNA	standard	MIMAT0007549	gga-miR-1666
1606	gga-miR-1750	UGAGGACCAAGUGCAUCACUGC	1	52	25	experimental		mature miRNA	standard	MIMAT0007657	gga-miR-1750
1607	gga-miR-19b-3p	UGUGCAAAUCCAUGCAAAACUGA	1	52	26	experimental		mature miRNA	standard	MIMAT0001110	gga-miR-19b-3p
1608	gga-miR-3530-3p	CAAUGGUGUGAGCUGGGAUGG	1	52	27	experimental		mature miRNA	standard	MIMAT0016379	gga-miR-3530-3p
1609	gga-miR-6567-5p	AGCUCCGAACUCGCGGUGCCCG	1	52	28	experimental		mature miRNA	standard	MIMAT0025639	gga-miR-6567-5p
1610	gga-miR-6654-3p	UCAGCACUGGGGCUGAGCUGGCA	1	52	29	experimental		mature miRNA	standard	MIMAT0025755	gga-miR-6654-3p
1611	gga-miR-7458-5p	UUGCGGAACAAGUUCUCAGGGC	1	52	30	experimental		mature miRNA	standard	MIMAT0029070	gga-miR-7458-5p
1612	Ctr02-3M10		1	52	31	control	control_spike_calibration	LC Internal Use	control
1613	Ctr03-3P		1	53	1	control	control_spike_calibration	LC Internal Use	control
1614	gga-miR-128-3p	UCACAGUGAACCGGUCUCUUU	1	53	2	experimental		mature miRNA	standard	MIMAT0001123	gga-miR-128-3p
1615	gga-miR-1583	CGUAGGGCCGUGGGACGGCA	1	53	3	experimental		mature miRNA	standard	MIMAT0007444	gga-miR-1583
1616	gga-miR-1667-3p	UAACAUGAUGUCAGGAUUUCCC	1	53	4	experimental		mature miRNA	standard	MIMAT0007550	gga-miR-1667-3p
1617	gga-miR-1751-5p	UGAGCUGCUCUGUUCCUGCAUCC	1	53	5	experimental		mature miRNA	standard	MIMAT0007658	gga-miR-1751-5p
1618	gga-miR-19b-5p	AGUUUUGCAGGUUUGCAUCCAGC	1	53	6	experimental		mature miRNA	standard	MIMAT0026496	gga-miR-19b-5p
1619	gga-miR-3530-5p	GCUCUGCUCGCACCAUUGUGG	1	53	7	experimental		mature miRNA	standard	MIMAT0027029	gga-miR-3530-5p
1620	gga-miR-6568-3p	ACAACCAAGAUGGCGCCCGGGC	1	53	8	experimental		mature miRNA	standard	MIMAT0025644	gga-miR-6568-3p
1621	gga-miR-6655-5p	UCUGCUAGGAGGCUGUGUAUCCU	1	53	9	experimental		mature miRNA	standard	MIMAT0025756	gga-miR-6655-5p
1622	gga-miR-7459-3p	UGGGAUAGUACUGUAUGAGGCGU	1	53	10	experimental		mature miRNA	standard	MIMAT0029073	gga-miR-7459-3p
1623	Ctr03-3P		1	53	11	control	control_spike_calibration	LC Internal Use	control
1624	gga-miR-128-3p	UCACAGUGAACCGGUCUCUUU	1	53	12	experimental		mature miRNA	standard	MIMAT0001123	gga-miR-128-3p
1625	gga-miR-1583	CGUAGGGCCGUGGGACGGCA	1	53	13	experimental		mature miRNA	standard	MIMAT0007444	gga-miR-1583
1626	gga-miR-1667-3p	UAACAUGAUGUCAGGAUUUCCC	1	53	14	experimental		mature miRNA	standard	MIMAT0007550	gga-miR-1667-3p
1627	gga-miR-1751-5p	UGAGCUGCUCUGUUCCUGCAUCC	1	53	15	experimental		mature miRNA	standard	MIMAT0007658	gga-miR-1751-5p
1628	gga-miR-19b-5p	AGUUUUGCAGGUUUGCAUCCAGC	1	53	16	experimental		mature miRNA	standard	MIMAT0026496	gga-miR-19b-5p
1629	gga-miR-3530-5p	GCUCUGCUCGCACCAUUGUGG	1	53	17	experimental		mature miRNA	standard	MIMAT0027029	gga-miR-3530-5p
1630	gga-miR-6568-3p	ACAACCAAGAUGGCGCCCGGGC	1	53	18	experimental		mature miRNA	standard	MIMAT0025644	gga-miR-6568-3p
1631	gga-miR-6655-5p	UCUGCUAGGAGGCUGUGUAUCCU	1	53	19	experimental		mature miRNA	standard	MIMAT0025756	gga-miR-6655-5p
1632	gga-miR-7459-3p	UGGGAUAGUACUGUAUGAGGCGU	1	53	20	experimental		mature miRNA	standard	MIMAT0029073	gga-miR-7459-3p
1633	Ctr03-3P		1	53	21	control	control_spike_calibration	LC Internal Use	control
1634	gga-miR-128-3p	UCACAGUGAACCGGUCUCUUU	1	53	22	experimental		mature miRNA	standard	MIMAT0001123	gga-miR-128-3p
1635	gga-miR-1583	CGUAGGGCCGUGGGACGGCA	1	53	23	experimental		mature miRNA	standard	MIMAT0007444	gga-miR-1583
1636	gga-miR-1667-3p	UAACAUGAUGUCAGGAUUUCCC	1	53	24	experimental		mature miRNA	standard	MIMAT0007550	gga-miR-1667-3p
1637	gga-miR-1751-5p	UGAGCUGCUCUGUUCCUGCAUCC	1	53	25	experimental		mature miRNA	standard	MIMAT0007658	gga-miR-1751-5p
1638	gga-miR-19b-5p	AGUUUUGCAGGUUUGCAUCCAGC	1	53	26	experimental		mature miRNA	standard	MIMAT0026496	gga-miR-19b-5p
1639	gga-miR-3530-5p	GCUCUGCUCGCACCAUUGUGG	1	53	27	experimental		mature miRNA	standard	MIMAT0027029	gga-miR-3530-5p
1640	gga-miR-6568-3p	ACAACCAAGAUGGCGCCCGGGC	1	53	28	experimental		mature miRNA	standard	MIMAT0025644	gga-miR-6568-3p
1641	gga-miR-6655-5p	UCUGCUAGGAGGCUGUGUAUCCU	1	53	29	experimental		mature miRNA	standard	MIMAT0025756	gga-miR-6655-5p
1642	gga-miR-7459-3p	UGGGAUAGUACUGUAUGAGGCGU	1	53	30	experimental		mature miRNA	standard	MIMAT0029073	gga-miR-7459-3p
1643	Ctr03-3P		1	53	31	control	control_spike_calibration	LC Internal Use	control
1644	Ctr03-3M05		1	54	1	control	control_spike_calibration	LC Internal Use	control
1645	gga-miR-1306-3p	UGGACGUUGGCUCUGGUGGUGAU	1	54	2	experimental		mature miRNA	standard	MIMAT0007329	gga-miR-1306-3p
1646	gga-miR-1584	CCGGGUGGGGCUGGGCUGGG	1	54	3	experimental		mature miRNA	standard	MIMAT0007445	gga-miR-1584
1647	gga-miR-1667-5p	GAGAUUCUGACACAAUGUUUAGA	1	54	4	experimental		mature miRNA	standard	MIMAT0026778	gga-miR-1667-5p
1648	gga-miR-1752	UUCUGUUGGAGAGAAGAGACA	1	54	5	experimental		mature miRNA	standard	MIMAT0007659	gga-miR-1752
1649	gga-miR-1a-1-5p	ACAUACUUCUUUAUAUGCCCAUA	1	54	6	experimental		mature miRNA	standard	MIMAT0031071	gga-miR-1a-1-5p
1650	gga-miR-3531-3p	CCUUGCAACACAAACAGGAGACA	1	54	7	experimental		mature miRNA	standard	MIMAT0027030	gga-miR-3531-3p
1651	gga-miR-6568-5p	GCGGCCGCCAUCUUGCUUGCG	1	54	8	experimental		mature miRNA	standard	MIMAT0025643	gga-miR-6568-5p
1652	gga-miR-6656-5p	UGCAGGGCGAGUAGAGAAAGGCAU	1	54	9	experimental		mature miRNA	standard	MIMAT0025757	gga-miR-6656-5p
1653	gga-miR-7459-5p	GGCUUUGAGACAGUCUUUCUCAGU	1	54	10	experimental		mature miRNA	standard	MIMAT0029072	gga-miR-7459-5p
1654	Ctr03-3M05		1	54	11	control	control_spike_calibration	LC Internal Use	control
1655	gga-miR-1306-3p	UGGACGUUGGCUCUGGUGGUGAU	1	54	12	experimental		mature miRNA	standard	MIMAT0007329	gga-miR-1306-3p
1656	gga-miR-1584	CCGGGUGGGGCUGGGCUGGG	1	54	13	experimental		mature miRNA	standard	MIMAT0007445	gga-miR-1584
1657	gga-miR-1667-5p	GAGAUUCUGACACAAUGUUUAGA	1	54	14	experimental		mature miRNA	standard	MIMAT0026778	gga-miR-1667-5p
1658	gga-miR-1752	UUCUGUUGGAGAGAAGAGACA	1	54	15	experimental		mature miRNA	standard	MIMAT0007659	gga-miR-1752
1659	gga-miR-1a-1-5p	ACAUACUUCUUUAUAUGCCCAUA	1	54	16	experimental		mature miRNA	standard	MIMAT0031071	gga-miR-1a-1-5p
1660	gga-miR-3531-3p	CCUUGCAACACAAACAGGAGACA	1	54	17	experimental		mature miRNA	standard	MIMAT0027030	gga-miR-3531-3p
1661	gga-miR-6568-5p	GCGGCCGCCAUCUUGCUUGCG	1	54	18	experimental		mature miRNA	standard	MIMAT0025643	gga-miR-6568-5p
1662	gga-miR-6656-5p	UGCAGGGCGAGUAGAGAAAGGCAU	1	54	19	experimental		mature miRNA	standard	MIMAT0025757	gga-miR-6656-5p
1663	gga-miR-7459-5p	GGCUUUGAGACAGUCUUUCUCAGU	1	54	20	experimental		mature miRNA	standard	MIMAT0029072	gga-miR-7459-5p
1664	Ctr03-3M05		1	54	21	control	control_spike_calibration	LC Internal Use	control
1665	gga-miR-1306-3p	UGGACGUUGGCUCUGGUGGUGAU	1	54	22	experimental		mature miRNA	standard	MIMAT0007329	gga-miR-1306-3p
1666	gga-miR-1584	CCGGGUGGGGCUGGGCUGGG	1	54	23	experimental		mature miRNA	standard	MIMAT0007445	gga-miR-1584
1667	gga-miR-1667-5p	GAGAUUCUGACACAAUGUUUAGA	1	54	24	experimental		mature miRNA	standard	MIMAT0026778	gga-miR-1667-5p
1668	gga-miR-1752	UUCUGUUGGAGAGAAGAGACA	1	54	25	experimental		mature miRNA	standard	MIMAT0007659	gga-miR-1752
1669	gga-miR-1a-1-5p	ACAUACUUCUUUAUAUGCCCAUA	1	54	26	experimental		mature miRNA	standard	MIMAT0031071	gga-miR-1a-1-5p
1670	gga-miR-3531-3p	CCUUGCAACACAAACAGGAGACA	1	54	27	experimental		mature miRNA	standard	MIMAT0027030	gga-miR-3531-3p
1671	gga-miR-6568-5p	GCGGCCGCCAUCUUGCUUGCG	1	54	28	experimental		mature miRNA	standard	MIMAT0025643	gga-miR-6568-5p
1672	gga-miR-6656-5p	UGCAGGGCGAGUAGAGAAAGGCAU	1	54	29	experimental		mature miRNA	standard	MIMAT0025757	gga-miR-6656-5p
1673	gga-miR-7459-5p	GGCUUUGAGACAGUCUUUCUCAGU	1	54	30	experimental		mature miRNA	standard	MIMAT0029072	gga-miR-7459-5p
1674	Ctr03-3M05		1	54	31	control	control_spike_calibration	LC Internal Use	control
1675	Ctr03-3M10		1	55	1	control	control_spike_calibration	LC Internal Use	control
1676	gga-miR-1306-5p	ACCACCUCCCCUGCAAACGUCCAGU	1	55	2	experimental		mature miRNA	standard	MIMAT0026763	gga-miR-1306-5p
1677	gga-miR-1585	AGUGCCCAGGUGUGGUUAAUCCUG	1	55	3	experimental		mature miRNA	standard	MIMAT0007447	gga-miR-1585
1678	gga-miR-1668-3p	UGCUGUGUCCUCACUCACCUU	1	55	4	experimental		mature miRNA	standard	MIMAT0007552	gga-miR-1668-3p
1679	gga-miR-1753	GUGAAAUCCGGGUGAAGGCUGU	1	55	5	experimental		mature miRNA	standard	MIMAT0007660	gga-miR-1753
1680	gga-miR-1a-2-5p	ACAUACUUCUUUAUGUACCCAUA	1	55	6	experimental		mature miRNA	standard	MIMAT0026510	gga-miR-1a-2-5p
1681	gga-miR-3531-5p	UCCUUGUUUGGGUUGUAAUGA	1	55	7	experimental		mature miRNA	standard	MIMAT0016381	gga-miR-3531-5p
1682	gga-miR-6569-3p	CUUGAGUUACGGACUGGGGUUGG	1	55	8	experimental		mature miRNA	standard	MIMAT0025646	gga-miR-6569-3p
1683	gga-miR-6657-3p	ACAUGGUGGGAGAAGGGUGAC	1	55	9	experimental		mature miRNA	standard	MIMAT0025758	gga-miR-6657-3p
1684	gga-miR-7460-3p	CCUGACUGAGCUCUGCUUUCUC	1	55	10	experimental		mature miRNA	standard	MIMAT0029075	gga-miR-7460-3p
1685	Ctr03-3M10		1	55	11	control	control_spike_calibration	LC Internal Use	control
1686	gga-miR-1306-5p	ACCACCUCCCCUGCAAACGUCCAGU	1	55	12	experimental		mature miRNA	standard	MIMAT0026763	gga-miR-1306-5p
1687	gga-miR-1585	AGUGCCCAGGUGUGGUUAAUCCUG	1	55	13	experimental		mature miRNA	standard	MIMAT0007447	gga-miR-1585
1688	gga-miR-1668-3p	UGCUGUGUCCUCACUCACCUU	1	55	14	experimental		mature miRNA	standard	MIMAT0007552	gga-miR-1668-3p
1689	gga-miR-1753	GUGAAAUCCGGGUGAAGGCUGU	1	55	15	experimental		mature miRNA	standard	MIMAT0007660	gga-miR-1753
1690	gga-miR-1a-2-5p	ACAUACUUCUUUAUGUACCCAUA	1	55	16	experimental		mature miRNA	standard	MIMAT0026510	gga-miR-1a-2-5p
1691	gga-miR-3531-5p	UCCUUGUUUGGGUUGUAAUGA	1	55	17	experimental		mature miRNA	standard	MIMAT0016381	gga-miR-3531-5p
1692	gga-miR-6569-3p	CUUGAGUUACGGACUGGGGUUGG	1	55	18	experimental		mature miRNA	standard	MIMAT0025646	gga-miR-6569-3p
1693	gga-miR-6657-3p	ACAUGGUGGGAGAAGGGUGAC	1	55	19	experimental		mature miRNA	standard	MIMAT0025758	gga-miR-6657-3p
1694	gga-miR-7460-3p	CCUGACUGAGCUCUGCUUUCUC	1	55	20	experimental		mature miRNA	standard	MIMAT0029075	gga-miR-7460-3p
1695	Ctr03-3M10		1	55	21	control	control_spike_calibration	LC Internal Use	control
1696	gga-miR-1306-5p	ACCACCUCCCCUGCAAACGUCCAGU	1	55	22	experimental		mature miRNA	standard	MIMAT0026763	gga-miR-1306-5p
1697	gga-miR-1585	AGUGCCCAGGUGUGGUUAAUCCUG	1	55	23	experimental		mature miRNA	standard	MIMAT0007447	gga-miR-1585
1698	gga-miR-1668-3p	UGCUGUGUCCUCACUCACCUU	1	55	24	experimental		mature miRNA	standard	MIMAT0007552	gga-miR-1668-3p
1699	gga-miR-1753	GUGAAAUCCGGGUGAAGGCUGU	1	55	25	experimental		mature miRNA	standard	MIMAT0007660	gga-miR-1753
1700	gga-miR-1a-2-5p	ACAUACUUCUUUAUGUACCCAUA	1	55	26	experimental		mature miRNA	standard	MIMAT0026510	gga-miR-1a-2-5p
1701	gga-miR-3531-5p	UCCUUGUUUGGGUUGUAAUGA	1	55	27	experimental		mature miRNA	standard	MIMAT0016381	gga-miR-3531-5p
1702	gga-miR-6569-3p	CUUGAGUUACGGACUGGGGUUGG	1	55	28	experimental		mature miRNA	standard	MIMAT0025646	gga-miR-6569-3p
1703	gga-miR-6657-3p	ACAUGGUGGGAGAAGGGUGAC	1	55	29	experimental		mature miRNA	standard	MIMAT0025758	gga-miR-6657-3p
1704	gga-miR-7460-3p	CCUGACUGAGCUCUGCUUUCUC	1	55	30	experimental		mature miRNA	standard	MIMAT0029075	gga-miR-7460-3p
1705	Ctr03-3M10		1	55	31	control	control_spike_calibration	LC Internal Use	control
1706	Ctr04-3P		1	56	1	control	control_spike_calibration	LC Internal Use	control
1707	gga-miR-130a-3p	CAGUGCAAUAUUAAAAGGGCAU	1	56	2	experimental		mature miRNA	standard	MIMAT0001167	gga-miR-130a-3p
1708	gga-miR-1586	CAGUCAGCUGUGGGUGGGUGGCA	1	56	3	experimental		mature miRNA	standard	MIMAT0007448	gga-miR-1586
1709	gga-miR-1668-5p	GUGGGCUGGGAGCACAGGCACU	1	56	4	experimental		mature miRNA	standard	MIMAT0007551	gga-miR-1668-5p
1710	gga-miR-1754-3p	AGGGCAGCUCACAGCACGGGG	1	56	5	experimental		mature miRNA	standard	MIMAT0026782	gga-miR-1754-3p
1711	gga-miR-1a-3p	UGGAAUGUAAAGAAGUAUGUA	1	56	6	experimental		mature miRNA	standard	MIMAT0001127	gga-miR-1a-3p
1712	gga-miR-3532-3p	UUGGAGGCUGCAGUGUCAUGGU	1	56	7	experimental		mature miRNA	standard	MIMAT0016383	gga-miR-3532-3p
1713	gga-miR-6569-5p	GCCCUGUUGGACUAACGGCGUUG	1	56	8	experimental		mature miRNA	standard	MIMAT0025645	gga-miR-6569-5p
1714	gga-miR-6658-3p	CAUGGACGGGGGAAGGAGAUAGC	1	56	9	experimental		mature miRNA	standard	MIMAT0025759	gga-miR-6658-3p
1715	gga-miR-7460-5p	GAUGGCAGAGCCCUCAGACUGAGGC	1	56	10	experimental		mature miRNA	standard	MIMAT0029074	gga-miR-7460-5p
1716	Ctr04-3P		1	56	11	control	control_spike_calibration	LC Internal Use	control
1717	gga-miR-130a-3p	CAGUGCAAUAUUAAAAGGGCAU	1	56	12	experimental		mature miRNA	standard	MIMAT0001167	gga-miR-130a-3p
1718	gga-miR-1586	CAGUCAGCUGUGGGUGGGUGGCA	1	56	13	experimental		mature miRNA	standard	MIMAT0007448	gga-miR-1586
1719	gga-miR-1668-5p	GUGGGCUGGGAGCACAGGCACU	1	56	14	experimental		mature miRNA	standard	MIMAT0007551	gga-miR-1668-5p
1720	gga-miR-1754-3p	AGGGCAGCUCACAGCACGGGG	1	56	15	experimental		mature miRNA	standard	MIMAT0026782	gga-miR-1754-3p
1721	gga-miR-1a-3p	UGGAAUGUAAAGAAGUAUGUA	1	56	16	experimental		mature miRNA	standard	MIMAT0001127	gga-miR-1a-3p
1722	gga-miR-3532-3p	UUGGAGGCUGCAGUGUCAUGGU	1	56	17	experimental		mature miRNA	standard	MIMAT0016383	gga-miR-3532-3p
1723	gga-miR-6569-5p	GCCCUGUUGGACUAACGGCGUUG	1	56	18	experimental		mature miRNA	standard	MIMAT0025645	gga-miR-6569-5p
1724	gga-miR-6658-3p	CAUGGACGGGGGAAGGAGAUAGC	1	56	19	experimental		mature miRNA	standard	MIMAT0025759	gga-miR-6658-3p
1725	gga-miR-7460-5p	GAUGGCAGAGCCCUCAGACUGAGGC	1	56	20	experimental		mature miRNA	standard	MIMAT0029074	gga-miR-7460-5p
1726	Ctr04-3P		1	56	21	control	control_spike_calibration	LC Internal Use	control
1727	gga-miR-130a-3p	CAGUGCAAUAUUAAAAGGGCAU	1	56	22	experimental		mature miRNA	standard	MIMAT0001167	gga-miR-130a-3p
1728	gga-miR-1586	CAGUCAGCUGUGGGUGGGUGGCA	1	56	23	experimental		mature miRNA	standard	MIMAT0007448	gga-miR-1586
1729	gga-miR-1668-5p	GUGGGCUGGGAGCACAGGCACU	1	56	24	experimental		mature miRNA	standard	MIMAT0007551	gga-miR-1668-5p
1730	gga-miR-1754-3p	AGGGCAGCUCACAGCACGGGG	1	56	25	experimental		mature miRNA	standard	MIMAT0026782	gga-miR-1754-3p
1731	gga-miR-1a-3p	UGGAAUGUAAAGAAGUAUGUA	1	56	26	experimental		mature miRNA	standard	MIMAT0001127	gga-miR-1a-3p
1732	gga-miR-3532-3p	UUGGAGGCUGCAGUGUCAUGGU	1	56	27	experimental		mature miRNA	standard	MIMAT0016383	gga-miR-3532-3p
1733	gga-miR-6569-5p	GCCCUGUUGGACUAACGGCGUUG	1	56	28	experimental		mature miRNA	standard	MIMAT0025645	gga-miR-6569-5p
1734	gga-miR-6658-3p	CAUGGACGGGGGAAGGAGAUAGC	1	56	29	experimental		mature miRNA	standard	MIMAT0025759	gga-miR-6658-3p
1735	gga-miR-7460-5p	GAUGGCAGAGCCCUCAGACUGAGGC	1	56	30	experimental		mature miRNA	standard	MIMAT0029074	gga-miR-7460-5p
1736	Ctr04-3P		1	56	31	control	control_spike_calibration	LC Internal Use	control
1737	Ctr04-3M05		1	57	1	control	control_spike_calibration	LC Internal Use	control
1738	gga-miR-130a-5p	GCCCUUUUUCUGUUGUACUACU	1	57	2	experimental		mature miRNA	standard	MIMAT0026532	gga-miR-130a-5p
1739	gga-miR-1587	GGGCUGGGCUGGGCUGGGCA	1	57	3	experimental		mature miRNA	standard	MIMAT0007449	gga-miR-1587
1740	gga-miR-1669	GUGGGCUCAGAGCAGGCACA	1	57	4	experimental		mature miRNA	standard	MIMAT0007553	gga-miR-1669
1741	gga-miR-1754-5p	UCGUGCUGGAGCUGUUCUGG	1	57	5	experimental		mature miRNA	standard	MIMAT0007661	gga-miR-1754-5p
1742	gga-miR-1b-3p	UGGAAUGUUAAGAAGUAUGUA	1	57	6	experimental		mature miRNA	standard	MIMAT0001175	gga-miR-1b-3p
1743	gga-miR-3532-5p	GUUGCACUGCAGCUGCUCUUGG	1	57	7	experimental		mature miRNA	standard	MIMAT0027031	gga-miR-3532-5p
1744	gga-miR-6570-3p	AGAGGAGAGCCUGUGGGCCAGA	1	57	8	experimental		mature miRNA	standard	MIMAT0025648	gga-miR-6570-3p
1745	gga-miR-6659-3p	UUUGGCUGCCAUCGGACCUGGU	1	57	9	experimental		mature miRNA	standard	MIMAT0025760	gga-miR-6659-3p
1746	gga-miR-7461-3p	CAUGGCUGGAAUGUGGUCAUGGAUG	1	57	10	experimental		mature miRNA	standard	MIMAT0029077	gga-miR-7461-3p
1747	Ctr04-3M05		1	57	11	control	control_spike_calibration	LC Internal Use	control
1748	gga-miR-130a-5p	GCCCUUUUUCUGUUGUACUACU	1	57	12	experimental		mature miRNA	standard	MIMAT0026532	gga-miR-130a-5p
1749	gga-miR-1587	GGGCUGGGCUGGGCUGGGCA	1	57	13	experimental		mature miRNA	standard	MIMAT0007449	gga-miR-1587
1750	gga-miR-1669	GUGGGCUCAGAGCAGGCACA	1	57	14	experimental		mature miRNA	standard	MIMAT0007553	gga-miR-1669
1751	gga-miR-1754-5p	UCGUGCUGGAGCUGUUCUGG	1	57	15	experimental		mature miRNA	standard	MIMAT0007661	gga-miR-1754-5p
1752	gga-miR-1b-3p	UGGAAUGUUAAGAAGUAUGUA	1	57	16	experimental		mature miRNA	standard	MIMAT0001175	gga-miR-1b-3p
1753	gga-miR-3532-5p	GUUGCACUGCAGCUGCUCUUGG	1	57	17	experimental		mature miRNA	standard	MIMAT0027031	gga-miR-3532-5p
1754	gga-miR-6570-3p	AGAGGAGAGCCUGUGGGCCAGA	1	57	18	experimental		mature miRNA	standard	MIMAT0025648	gga-miR-6570-3p
1755	gga-miR-6659-3p	UUUGGCUGCCAUCGGACCUGGU	1	57	19	experimental		mature miRNA	standard	MIMAT0025760	gga-miR-6659-3p
1756	gga-miR-7461-3p	CAUGGCUGGAAUGUGGUCAUGGAUG	1	57	20	experimental		mature miRNA	standard	MIMAT0029077	gga-miR-7461-3p
1757	Ctr04-3M05		1	57	21	control	control_spike_calibration	LC Internal Use	control
1758	gga-miR-130a-5p	GCCCUUUUUCUGUUGUACUACU	1	57	22	experimental		mature miRNA	standard	MIMAT0026532	gga-miR-130a-5p
1759	gga-miR-1587	GGGCUGGGCUGGGCUGGGCA	1	57	23	experimental		mature miRNA	standard	MIMAT0007449	gga-miR-1587
1760	gga-miR-1669	GUGGGCUCAGAGCAGGCACA	1	57	24	experimental		mature miRNA	standard	MIMAT0007553	gga-miR-1669
1761	gga-miR-1754-5p	UCGUGCUGGAGCUGUUCUGG	1	57	25	experimental		mature miRNA	standard	MIMAT0007661	gga-miR-1754-5p
1762	gga-miR-1b-3p	UGGAAUGUUAAGAAGUAUGUA	1	57	26	experimental		mature miRNA	standard	MIMAT0001175	gga-miR-1b-3p
1763	gga-miR-3532-5p	GUUGCACUGCAGCUGCUCUUGG	1	57	27	experimental		mature miRNA	standard	MIMAT0027031	gga-miR-3532-5p
1764	gga-miR-6570-3p	AGAGGAGAGCCUGUGGGCCAGA	1	57	28	experimental		mature miRNA	standard	MIMAT0025648	gga-miR-6570-3p
1765	gga-miR-6659-3p	UUUGGCUGCCAUCGGACCUGGU	1	57	29	experimental		mature miRNA	standard	MIMAT0025760	gga-miR-6659-3p
1766	gga-miR-7461-3p	CAUGGCUGGAAUGUGGUCAUGGAUG	1	57	30	experimental		mature miRNA	standard	MIMAT0029077	gga-miR-7461-3p
1767	Ctr04-3M05		1	57	31	control	control_spike_calibration	LC Internal Use	control
1768	Ctr04-3M10		1	58	1	control	control_spike_calibration	LC Internal Use	control
1769	gga-miR-130b-3p	CAGUGCAAUAAUGAAAGGGCGU	1	58	2	experimental		mature miRNA	standard	MIMAT0001165	gga-miR-130b-3p
1770	gga-miR-1588	CAGGAACCAGCUUUCGGCUCU	1	58	3	experimental		mature miRNA	standard	MIMAT0007450	gga-miR-1588
1771	gga-miR-1670	GUGGGACGUAGCCUCACAGUGG	1	58	4	experimental		mature miRNA	standard	MIMAT0007554	gga-miR-1670
1772	gga-miR-1755	UCGGUGAAUGGCUUGGCAUG	1	58	5	experimental		mature miRNA	standard	MIMAT0007662	gga-miR-1755
1773	gga-miR-1b-5p	ACAUACUUCUUCAUAUGCCCAUA	1	58	6	experimental		mature miRNA	standard	MIMAT0026536	gga-miR-1b-5p
1774	gga-miR-3533	AUGAAGUGUGAUGUGGAUAU	1	58	7	experimental		mature miRNA	standard	MIMAT0016384	gga-miR-3533
1775	gga-miR-6570-5p	AGGACCCACUGGAUCUGCAUCUUC	1	58	8	experimental		mature miRNA	standard	MIMAT0025647	gga-miR-6570-5p
1776	gga-miR-6660-3p	UCUGACAUGGCUCUGCUCCGCAGU	1	58	9	experimental		mature miRNA	standard	MIMAT0025761	gga-miR-6660-3p
1777	gga-miR-7461-5p	UCUGUGAUCAGGCAGGAGAUGAU	1	58	10	experimental		mature miRNA	standard	MIMAT0029076	gga-miR-7461-5p
1778	Ctr04-3M10		1	58	11	control	control_spike_calibration	LC Internal Use	control
1779	gga-miR-130b-3p	CAGUGCAAUAAUGAAAGGGCGU	1	58	12	experimental		mature miRNA	standard	MIMAT0001165	gga-miR-130b-3p
1780	gga-miR-1588	CAGGAACCAGCUUUCGGCUCU	1	58	13	experimental		mature miRNA	standard	MIMAT0007450	gga-miR-1588
1781	gga-miR-1670	GUGGGACGUAGCCUCACAGUGG	1	58	14	experimental		mature miRNA	standard	MIMAT0007554	gga-miR-1670
1782	gga-miR-1755	UCGGUGAAUGGCUUGGCAUG	1	58	15	experimental		mature miRNA	standard	MIMAT0007662	gga-miR-1755
1783	gga-miR-1b-5p	ACAUACUUCUUCAUAUGCCCAUA	1	58	16	experimental		mature miRNA	standard	MIMAT0026536	gga-miR-1b-5p
1784	gga-miR-3533	AUGAAGUGUGAUGUGGAUAU	1	58	17	experimental		mature miRNA	standard	MIMAT0016384	gga-miR-3533
1785	gga-miR-6570-5p	AGGACCCACUGGAUCUGCAUCUUC	1	58	18	experimental		mature miRNA	standard	MIMAT0025647	gga-miR-6570-5p
1786	gga-miR-6660-3p	UCUGACAUGGCUCUGCUCCGCAGU	1	58	19	experimental		mature miRNA	standard	MIMAT0025761	gga-miR-6660-3p
1787	gga-miR-7461-5p	UCUGUGAUCAGGCAGGAGAUGAU	1	58	20	experimental		mature miRNA	standard	MIMAT0029076	gga-miR-7461-5p
1788	Ctr04-3M10		1	58	21	control	control_spike_calibration	LC Internal Use	control
1789	gga-miR-130b-3p	CAGUGCAAUAAUGAAAGGGCGU	1	58	22	experimental		mature miRNA	standard	MIMAT0001165	gga-miR-130b-3p
1790	gga-miR-1588	CAGGAACCAGCUUUCGGCUCU	1	58	23	experimental		mature miRNA	standard	MIMAT0007450	gga-miR-1588
1791	gga-miR-1670	GUGGGACGUAGCCUCACAGUGG	1	58	24	experimental		mature miRNA	standard	MIMAT0007554	gga-miR-1670
1792	gga-miR-1755	UCGGUGAAUGGCUUGGCAUG	1	58	25	experimental		mature miRNA	standard	MIMAT0007662	gga-miR-1755
1793	gga-miR-1b-5p	ACAUACUUCUUCAUAUGCCCAUA	1	58	26	experimental		mature miRNA	standard	MIMAT0026536	gga-miR-1b-5p
1794	gga-miR-3533	AUGAAGUGUGAUGUGGAUAU	1	58	27	experimental		mature miRNA	standard	MIMAT0016384	gga-miR-3533
1795	gga-miR-6570-5p	AGGACCCACUGGAUCUGCAUCUUC	1	58	28	experimental		mature miRNA	standard	MIMAT0025647	gga-miR-6570-5p
1796	gga-miR-6660-3p	UCUGACAUGGCUCUGCUCCGCAGU	1	58	29	experimental		mature miRNA	standard	MIMAT0025761	gga-miR-6660-3p
1797	gga-miR-7461-5p	UCUGUGAUCAGGCAGGAGAUGAU	1	58	30	experimental		mature miRNA	standard	MIMAT0029076	gga-miR-7461-5p
1798	Ctr04-3M10		1	58	31	control	control_spike_calibration	LC Internal Use	control
1799	Ctr05-3P		1	59	1	control	control_spike_calibration	LC Internal Use	control
1800	gga-miR-130b-5p	CCUCUUUCCCUGUUGCACUACU	1	59	2	experimental		mature miRNA	standard	MIMAT0026530	gga-miR-130b-5p
1801	gga-miR-1589	CAGCCUCUGCUGAUCGUCUUUU	1	59	3	experimental		mature miRNA	standard	MIMAT0007451	gga-miR-1589
1802	gga-miR-1671	GUGAGGACUGUUGAGUGGCCAAA	1	59	4	experimental		mature miRNA	standard	MIMAT0007555	gga-miR-1671
1803	gga-miR-1756a	UCCAGUGAUUCACACCAGCUGU	1	59	5	experimental		mature miRNA	standard	MIMAT0007663	gga-miR-1756a
1804	gga-miR-1c	UGGAAUGGAAAGCAGUAUGUAU	1	59	6	experimental		mature miRNA	standard	MIMAT0007503	gga-miR-1c
1805	gga-miR-3534	UGUGGGUUGACAGUGCUGAGGU	1	59	7	experimental		mature miRNA	standard	MIMAT0016385	gga-miR-3534
1806	gga-miR-6571-3p	UGAGAGACCACAUACAGCUUUGAAA	1	59	8	experimental		mature miRNA	standard	MIMAT0025650	gga-miR-6571-3p
1807	gga-miR-6661-5p	AGGGCUGCAGCAUGCAGAAGCU	1	59	9	experimental		mature miRNA	standard	MIMAT0025762	gga-miR-6661-5p
1808	gga-miR-7462-3p	GGAAGCUUGAAAUAAGGUUGAA	1	59	10	experimental		mature miRNA	standard	MIMAT0029079	gga-miR-7462-3p
1809	Ctr05-3P		1	59	11	control	control_spike_calibration	LC Internal Use	control
1810	gga-miR-130b-5p	CCUCUUUCCCUGUUGCACUACU	1	59	12	experimental		mature miRNA	standard	MIMAT0026530	gga-miR-130b-5p
1811	gga-miR-1589	CAGCCUCUGCUGAUCGUCUUUU	1	59	13	experimental		mature miRNA	standard	MIMAT0007451	gga-miR-1589
1812	gga-miR-1671	GUGAGGACUGUUGAGUGGCCAAA	1	59	14	experimental		mature miRNA	standard	MIMAT0007555	gga-miR-1671
1813	gga-miR-1756a	UCCAGUGAUUCACACCAGCUGU	1	59	15	experimental		mature miRNA	standard	MIMAT0007663	gga-miR-1756a
1814	gga-miR-1c	UGGAAUGGAAAGCAGUAUGUAU	1	59	16	experimental		mature miRNA	standard	MIMAT0007503	gga-miR-1c
1815	gga-miR-3534	UGUGGGUUGACAGUGCUGAGGU	1	59	17	experimental		mature miRNA	standard	MIMAT0016385	gga-miR-3534
1816	gga-miR-6571-3p	UGAGAGACCACAUACAGCUUUGAAA	1	59	18	experimental		mature miRNA	standard	MIMAT0025650	gga-miR-6571-3p
1817	gga-miR-6661-5p	AGGGCUGCAGCAUGCAGAAGCU	1	59	19	experimental		mature miRNA	standard	MIMAT0025762	gga-miR-6661-5p
1818	gga-miR-7462-3p	GGAAGCUUGAAAUAAGGUUGAA	1	59	20	experimental		mature miRNA	standard	MIMAT0029079	gga-miR-7462-3p
1819	Ctr05-3P		1	59	21	control	control_spike_calibration	LC Internal Use	control
1820	gga-miR-130b-5p	CCUCUUUCCCUGUUGCACUACU	1	59	22	experimental		mature miRNA	standard	MIMAT0026530	gga-miR-130b-5p
1821	gga-miR-1589	CAGCCUCUGCUGAUCGUCUUUU	1	59	23	experimental		mature miRNA	standard	MIMAT0007451	gga-miR-1589
1822	gga-miR-1671	GUGAGGACUGUUGAGUGGCCAAA	1	59	24	experimental		mature miRNA	standard	MIMAT0007555	gga-miR-1671
1823	gga-miR-1756a	UCCAGUGAUUCACACCAGCUGU	1	59	25	experimental		mature miRNA	standard	MIMAT0007663	gga-miR-1756a
1824	gga-miR-1c	UGGAAUGGAAAGCAGUAUGUAU	1	59	26	experimental		mature miRNA	standard	MIMAT0007503	gga-miR-1c
1825	gga-miR-3534	UGUGGGUUGACAGUGCUGAGGU	1	59	27	experimental		mature miRNA	standard	MIMAT0016385	gga-miR-3534
1826	gga-miR-6571-3p	UGAGAGACCACAUACAGCUUUGAAA	1	59	28	experimental		mature miRNA	standard	MIMAT0025650	gga-miR-6571-3p
1827	gga-miR-6661-5p	AGGGCUGCAGCAUGCAGAAGCU	1	59	29	experimental		mature miRNA	standard	MIMAT0025762	gga-miR-6661-5p
1828	gga-miR-7462-3p	GGAAGCUUGAAAUAAGGUUGAA	1	59	30	experimental		mature miRNA	standard	MIMAT0029079	gga-miR-7462-3p
1829	Ctr05-3P		1	59	31	control	control_spike_calibration	LC Internal Use	control
1830	Ctr05-3M05		1	60	1	control	control_spike_calibration	LC Internal Use	control
1831	gga-miR-130c-3p	CAGUGCAAUGUUAAAAGGGCAU	1	60	2	experimental		mature miRNA	standard	MIMAT0007734	gga-miR-130c-3p
1832	gga-miR-1590	AGGGACAAAUUGCUCUCUGGAAG	1	60	3	experimental		mature miRNA	standard	MIMAT0007452	gga-miR-1590
1833	gga-miR-1672	GUCAGGCCAGGAAGGGAUGUGAGG	1	60	4	experimental		mature miRNA	standard	MIMAT0007556	gga-miR-1672
1834	gga-miR-1756b	UUCUCUGAUUUACACUAGCUGAG	1	60	5	experimental		mature miRNA	standard	MIMAT0007712	gga-miR-1756b
1835	gga-miR-200a-3p	UAACACUGUCUGGUAACGAUGU	1	60	6	experimental		mature miRNA	standard	MIMAT0001171	gga-miR-200a-3p
1836	gga-miR-3535	GGAUAUGAUGACUGAUUAUCUGAAA	1	60	7	experimental		mature miRNA	standard	MIMAT0016386	gga-miR-3535
1837	gga-miR-6571-5p	GUAAAGCUGUUUGGAUCUUCAG	1	60	8	experimental		mature miRNA	standard	MIMAT0025649	gga-miR-6571-5p
1838	gga-miR-6662-3p	AAUGGUUGACCAGUGGCUGAAC	1	60	9	experimental		mature miRNA	standard	MIMAT0025763	gga-miR-6662-3p
1839	gga-miR-7462-5p	CAACCUCAUUUCUAGCUUCUGG	1	60	10	experimental		mature miRNA	standard	MIMAT0029078	gga-miR-7462-5p
1840	Ctr05-3M05		1	60	11	control	control_spike_calibration	LC Internal Use	control
1841	gga-miR-130c-3p	CAGUGCAAUGUUAAAAGGGCAU	1	60	12	experimental		mature miRNA	standard	MIMAT0007734	gga-miR-130c-3p
1842	gga-miR-1590	AGGGACAAAUUGCUCUCUGGAAG	1	60	13	experimental		mature miRNA	standard	MIMAT0007452	gga-miR-1590
1843	gga-miR-1672	GUCAGGCCAGGAAGGGAUGUGAGG	1	60	14	experimental		mature miRNA	standard	MIMAT0007556	gga-miR-1672
1844	gga-miR-1756b	UUCUCUGAUUUACACUAGCUGAG	1	60	15	experimental		mature miRNA	standard	MIMAT0007712	gga-miR-1756b
1845	gga-miR-200a-3p	UAACACUGUCUGGUAACGAUGU	1	60	16	experimental		mature miRNA	standard	MIMAT0001171	gga-miR-200a-3p
1846	gga-miR-3535	GGAUAUGAUGACUGAUUAUCUGAAA	1	60	17	experimental		mature miRNA	standard	MIMAT0016386	gga-miR-3535
1847	gga-miR-6571-5p	GUAAAGCUGUUUGGAUCUUCAG	1	60	18	experimental		mature miRNA	standard	MIMAT0025649	gga-miR-6571-5p
1848	gga-miR-6662-3p	AAUGGUUGACCAGUGGCUGAAC	1	60	19	experimental		mature miRNA	standard	MIMAT0025763	gga-miR-6662-3p
1849	gga-miR-7462-5p	CAACCUCAUUUCUAGCUUCUGG	1	60	20	experimental		mature miRNA	standard	MIMAT0029078	gga-miR-7462-5p
1850	Ctr05-3M05		1	60	21	control	control_spike_calibration	LC Internal Use	control
1851	gga-miR-130c-3p	CAGUGCAAUGUUAAAAGGGCAU	1	60	22	experimental		mature miRNA	standard	MIMAT0007734	gga-miR-130c-3p
1852	gga-miR-1590	AGGGACAAAUUGCUCUCUGGAAG	1	60	23	experimental		mature miRNA	standard	MIMAT0007452	gga-miR-1590
1853	gga-miR-1672	GUCAGGCCAGGAAGGGAUGUGAGG	1	60	24	experimental		mature miRNA	standard	MIMAT0007556	gga-miR-1672
1854	gga-miR-1756b	UUCUCUGAUUUACACUAGCUGAG	1	60	25	experimental		mature miRNA	standard	MIMAT0007712	gga-miR-1756b
1855	gga-miR-200a-3p	UAACACUGUCUGGUAACGAUGU	1	60	26	experimental		mature miRNA	standard	MIMAT0001171	gga-miR-200a-3p
1856	gga-miR-3535	GGAUAUGAUGACUGAUUAUCUGAAA	1	60	27	experimental		mature miRNA	standard	MIMAT0016386	gga-miR-3535
1857	gga-miR-6571-5p	GUAAAGCUGUUUGGAUCUUCAG	1	60	28	experimental		mature miRNA	standard	MIMAT0025649	gga-miR-6571-5p
1858	gga-miR-6662-3p	AAUGGUUGACCAGUGGCUGAAC	1	60	29	experimental		mature miRNA	standard	MIMAT0025763	gga-miR-6662-3p
1859	gga-miR-7462-5p	CAACCUCAUUUCUAGCUUCUGG	1	60	30	experimental		mature miRNA	standard	MIMAT0029078	gga-miR-7462-5p
1860	Ctr05-3M05		1	60	31	control	control_spike_calibration	LC Internal Use	control
1861	Ctr05-3M10		1	61	1	control	control_spike_calibration	LC Internal Use	control
1862	gga-miR-130c-5p	GCCCUUUUUAUGUUGUACUACU	1	61	2	experimental		mature miRNA	standard	MIMAT0007733	gga-miR-130c-5p
1863	gga-miR-1591-3p	CAGACUUGGCCAUGGGUAGGA	1	61	3	experimental		mature miRNA	standard	MIMAT0007454	gga-miR-1591-3p
1864	gga-miR-1673	GGUGUGAGUGGAAGUCAGAGGU	1	61	4	experimental		mature miRNA	standard	MIMAT0007557	gga-miR-1673
1865	gga-miR-1757	UCAGAGGCGGAACAGUAGGUU	1	61	5	experimental		mature miRNA	standard	MIMAT0007664	gga-miR-1757
1866	gga-miR-200a-5p	CAUCUUACUAGACAGUGCUGGA	1	61	6	experimental		mature miRNA	standard	MIMAT0026533	gga-miR-200a-5p
1867	gga-miR-3536	CUGCAUACGAGUAGACCCUUUC	1	61	7	experimental		mature miRNA	standard	MIMAT0016387	gga-miR-3536
1868	gga-miR-6572-3p	AGAUGGACAGAUAGGGUGAGGA	1	61	8	experimental		mature miRNA	standard	MIMAT0025652	gga-miR-6572-3p
1869	gga-miR-6663-5p	AUUGCUGUGUGAGGAGUGCUG	1	61	9	experimental		mature miRNA	standard	MIMAT0025764	gga-miR-6663-5p
1870	gga-miR-7463-3p	AUUACUUUCAAUGGGACUAAGU	1	61	10	experimental		mature miRNA	standard	MIMAT0029081	gga-miR-7463-3p
1871	Ctr05-3M10		1	61	11	control	control_spike_calibration	LC Internal Use	control
1872	gga-miR-130c-5p	GCCCUUUUUAUGUUGUACUACU	1	61	12	experimental		mature miRNA	standard	MIMAT0007733	gga-miR-130c-5p
1873	gga-miR-1591-3p	CAGACUUGGCCAUGGGUAGGA	1	61	13	experimental		mature miRNA	standard	MIMAT0007454	gga-miR-1591-3p
1874	gga-miR-1673	GGUGUGAGUGGAAGUCAGAGGU	1	61	14	experimental		mature miRNA	standard	MIMAT0007557	gga-miR-1673
1875	gga-miR-1757	UCAGAGGCGGAACAGUAGGUU	1	61	15	experimental		mature miRNA	standard	MIMAT0007664	gga-miR-1757
1876	gga-miR-200a-5p	CAUCUUACUAGACAGUGCUGGA	1	61	16	experimental		mature miRNA	standard	MIMAT0026533	gga-miR-200a-5p
1877	gga-miR-3536	CUGCAUACGAGUAGACCCUUUC	1	61	17	experimental		mature miRNA	standard	MIMAT0016387	gga-miR-3536
1878	gga-miR-6572-3p	AGAUGGACAGAUAGGGUGAGGA	1	61	18	experimental		mature miRNA	standard	MIMAT0025652	gga-miR-6572-3p
1879	gga-miR-6663-5p	AUUGCUGUGUGAGGAGUGCUG	1	61	19	experimental		mature miRNA	standard	MIMAT0025764	gga-miR-6663-5p
1880	gga-miR-7463-3p	AUUACUUUCAAUGGGACUAAGU	1	61	20	experimental		mature miRNA	standard	MIMAT0029081	gga-miR-7463-3p
1881	Ctr05-3M10		1	61	21	control	control_spike_calibration	LC Internal Use	control
1882	gga-miR-130c-5p	GCCCUUUUUAUGUUGUACUACU	1	61	22	experimental		mature miRNA	standard	MIMAT0007733	gga-miR-130c-5p
1883	gga-miR-1591-3p	CAGACUUGGCCAUGGGUAGGA	1	61	23	experimental		mature miRNA	standard	MIMAT0007454	gga-miR-1591-3p
1884	gga-miR-1673	GGUGUGAGUGGAAGUCAGAGGU	1	61	24	experimental		mature miRNA	standard	MIMAT0007557	gga-miR-1673
1885	gga-miR-1757	UCAGAGGCGGAACAGUAGGUU	1	61	25	experimental		mature miRNA	standard	MIMAT0007664	gga-miR-1757
1886	gga-miR-200a-5p	CAUCUUACUAGACAGUGCUGGA	1	61	26	experimental		mature miRNA	standard	MIMAT0026533	gga-miR-200a-5p
1887	gga-miR-3536	CUGCAUACGAGUAGACCCUUUC	1	61	27	experimental		mature miRNA	standard	MIMAT0016387	gga-miR-3536
1888	gga-miR-6572-3p	AGAUGGACAGAUAGGGUGAGGA	1	61	28	experimental		mature miRNA	standard	MIMAT0025652	gga-miR-6572-3p
1889	gga-miR-6663-5p	AUUGCUGUGUGAGGAGUGCUG	1	61	29	experimental		mature miRNA	standard	MIMAT0025764	gga-miR-6663-5p
1890	gga-miR-7463-3p	AUUACUUUCAAUGGGACUAAGU	1	61	30	experimental		mature miRNA	standard	MIMAT0029081	gga-miR-7463-3p
1891	Ctr05-3M10		1	61	31	control	control_spike_calibration	LC Internal Use	control
1892	Ctr06-3P		1	62	1	control	control_spike_calibration	LC Internal Use	control
1893	gga-miR-1329-3p	CCUCGUAGCUUGAUCACGAUAU	1	62	2	experimental		mature miRNA	standard	MIMAT0007282	gga-miR-1329-3p
1894	gga-miR-1591-5p	UGAUUCAUUGCCUGGCUCUGC	1	62	3	experimental		mature miRNA	standard	MIMAT0007453	gga-miR-1591-5p
1895	gga-miR-1674	GGGCUAUGAUGCUGGAUUUUCUGAG	1	62	4	experimental		mature miRNA	standard	MIMAT0007558	gga-miR-1674
1896	gga-miR-1758	UCACCAAGCACUUGUCGGGCUAU	1	62	5	experimental		mature miRNA	standard	MIMAT0007665	gga-miR-1758
1897	gga-miR-200b-3p	UAAUACUGCCUGGUAAUGAUGAU	1	62	6	experimental		mature miRNA	standard	MIMAT0001172	gga-miR-200b-3p
1898	gga-miR-3537	GUGAGUGCUGUAGGAUGGGGCUC	1	62	7	experimental		mature miRNA	standard	MIMAT0016388	gga-miR-3537
1899	gga-miR-6572-5p	UUUUCCCUCUCUGUGCAGUUCUG	1	62	8	experimental		mature miRNA	standard	MIMAT0025651	gga-miR-6572-5p
1900	gga-miR-6664-3p	CAGGAAUGGUGCUGGAGGCUGA	1	62	9	experimental		mature miRNA	standard	MIMAT0025765	gga-miR-6664-3p
1901	gga-miR-7463-5p	UGAGUCUCCUUGAAAGUAAUGG	1	62	10	experimental		mature miRNA	standard	MIMAT0029080	gga-miR-7463-5p
1902	Ctr06-3P		1	62	11	control	control_spike_calibration	LC Internal Use	control
1903	gga-miR-1329-3p	CCUCGUAGCUUGAUCACGAUAU	1	62	12	experimental		mature miRNA	standard	MIMAT0007282	gga-miR-1329-3p
1904	gga-miR-1591-5p	UGAUUCAUUGCCUGGCUCUGC	1	62	13	experimental		mature miRNA	standard	MIMAT0007453	gga-miR-1591-5p
1905	gga-miR-1674	GGGCUAUGAUGCUGGAUUUUCUGAG	1	62	14	experimental		mature miRNA	standard	MIMAT0007558	gga-miR-1674
1906	gga-miR-1758	UCACCAAGCACUUGUCGGGCUAU	1	62	15	experimental		mature miRNA	standard	MIMAT0007665	gga-miR-1758
1907	gga-miR-200b-3p	UAAUACUGCCUGGUAAUGAUGAU	1	62	16	experimental		mature miRNA	standard	MIMAT0001172	gga-miR-200b-3p
1908	gga-miR-3537	GUGAGUGCUGUAGGAUGGGGCUC	1	62	17	experimental		mature miRNA	standard	MIMAT0016388	gga-miR-3537
1909	gga-miR-6572-5p	UUUUCCCUCUCUGUGCAGUUCUG	1	62	18	experimental		mature miRNA	standard	MIMAT0025651	gga-miR-6572-5p
1910	gga-miR-6664-3p	CAGGAAUGGUGCUGGAGGCUGA	1	62	19	experimental		mature miRNA	standard	MIMAT0025765	gga-miR-6664-3p
1911	gga-miR-7463-5p	UGAGUCUCCUUGAAAGUAAUGG	1	62	20	experimental		mature miRNA	standard	MIMAT0029080	gga-miR-7463-5p
1912	Ctr06-3P		1	62	21	control	control_spike_calibration	LC Internal Use	control
1913	gga-miR-1329-3p	CCUCGUAGCUUGAUCACGAUAU	1	62	22	experimental		mature miRNA	standard	MIMAT0007282	gga-miR-1329-3p
1914	gga-miR-1591-5p	UGAUUCAUUGCCUGGCUCUGC	1	62	23	experimental		mature miRNA	standard	MIMAT0007453	gga-miR-1591-5p
1915	gga-miR-1674	GGGCUAUGAUGCUGGAUUUUCUGAG	1	62	24	experimental		mature miRNA	standard	MIMAT0007558	gga-miR-1674
1916	gga-miR-1758	UCACCAAGCACUUGUCGGGCUAU	1	62	25	experimental		mature miRNA	standard	MIMAT0007665	gga-miR-1758
1917	gga-miR-200b-3p	UAAUACUGCCUGGUAAUGAUGAU	1	62	26	experimental		mature miRNA	standard	MIMAT0001172	gga-miR-200b-3p
1918	gga-miR-3537	GUGAGUGCUGUAGGAUGGGGCUC	1	62	27	experimental		mature miRNA	standard	MIMAT0016388	gga-miR-3537
1919	gga-miR-6572-5p	UUUUCCCUCUCUGUGCAGUUCUG	1	62	28	experimental		mature miRNA	standard	MIMAT0025651	gga-miR-6572-5p
1920	gga-miR-6664-3p	CAGGAAUGGUGCUGGAGGCUGA	1	62	29	experimental		mature miRNA	standard	MIMAT0025765	gga-miR-6664-3p
1921	gga-miR-7463-5p	UGAGUCUCCUUGAAAGUAAUGG	1	62	30	experimental		mature miRNA	standard	MIMAT0029080	gga-miR-7463-5p
1922	Ctr06-3P		1	62	31	control	control_spike_calibration	LC Internal Use	control
1923	Ctr06-3M05		1	63	1	control	control_spike_calibration	LC Internal Use	control
1924	gga-miR-1329-5p	UACAGUGAUCACGUUACGAUGG	1	63	2	experimental		mature miRNA	standard	MIMAT0007281	gga-miR-1329-5p
1925	gga-miR-1592	CACUGCCUCAGACAACGGGUGU	1	63	3	experimental		mature miRNA	standard	MIMAT0007455	gga-miR-1592
1926	gga-miR-1675	GGACGCCAUCUUGACUGUGGGCAG	1	63	4	experimental		mature miRNA	standard	MIMAT0007559	gga-miR-1675
1927	gga-miR-1759-3p	GCCUCCUCUCCCAUCCUCUCCUUCU	1	63	5	experimental		mature miRNA	standard	MIMAT0026783	gga-miR-1759-3p
1928	gga-miR-200b-5p	UCUUACUGGGCAGCAUUGGA	1	63	6	experimental		mature miRNA	standard	MIMAT0026534	gga-miR-200b-5p
1929	gga-miR-3538	GUUCGGUGAUGAAACCAUGGA	1	63	7	experimental		mature miRNA	standard	MIMAT0016389	gga-miR-3538
1930	gga-miR-6573-3p	GGAGGCACUCUGACUUCUCGGA	1	63	8	experimental		mature miRNA	standard	MIMAT0025654	gga-miR-6573-3p
1931	gga-miR-6665-5p	UGCCUGAAGGAUUUUGAUGCCC	1	63	9	experimental		mature miRNA	standard	MIMAT0025766	gga-miR-6665-5p
1932	gga-miR-7464-3p	UGGCACUGCACUGAGUCAUUGGC	1	63	10	experimental		mature miRNA	standard	MIMAT0029083	gga-miR-7464-3p
1933	Ctr06-3M05		1	63	11	control	control_spike_calibration	LC Internal Use	control
1934	gga-miR-1329-5p	UACAGUGAUCACGUUACGAUGG	1	63	12	experimental		mature miRNA	standard	MIMAT0007281	gga-miR-1329-5p
1935	gga-miR-1592	CACUGCCUCAGACAACGGGUGU	1	63	13	experimental		mature miRNA	standard	MIMAT0007455	gga-miR-1592
1936	gga-miR-1675	GGACGCCAUCUUGACUGUGGGCAG	1	63	14	experimental		mature miRNA	standard	MIMAT0007559	gga-miR-1675
1937	gga-miR-1759-3p	GCCUCCUCUCCCAUCCUCUCCUUCU	1	63	15	experimental		mature miRNA	standard	MIMAT0026783	gga-miR-1759-3p
1938	gga-miR-200b-5p	UCUUACUGGGCAGCAUUGGA	1	63	16	experimental		mature miRNA	standard	MIMAT0026534	gga-miR-200b-5p
1939	gga-miR-3538	GUUCGGUGAUGAAACCAUGGA	1	63	17	experimental		mature miRNA	standard	MIMAT0016389	gga-miR-3538
1940	gga-miR-6573-3p	GGAGGCACUCUGACUUCUCGGA	1	63	18	experimental		mature miRNA	standard	MIMAT0025654	gga-miR-6573-3p
1941	gga-miR-6665-5p	UGCCUGAAGGAUUUUGAUGCCC	1	63	19	experimental		mature miRNA	standard	MIMAT0025766	gga-miR-6665-5p
1942	gga-miR-7464-3p	UGGCACUGCACUGAGUCAUUGGC	1	63	20	experimental		mature miRNA	standard	MIMAT0029083	gga-miR-7464-3p
1943	Ctr06-3M05		1	63	21	control	control_spike_calibration	LC Internal Use	control
1944	gga-miR-1329-5p	UACAGUGAUCACGUUACGAUGG	1	63	22	experimental		mature miRNA	standard	MIMAT0007281	gga-miR-1329-5p
1945	gga-miR-1592	CACUGCCUCAGACAACGGGUGU	1	63	23	experimental		mature miRNA	standard	MIMAT0007455	gga-miR-1592
1946	gga-miR-1675	GGACGCCAUCUUGACUGUGGGCAG	1	63	24	experimental		mature miRNA	standard	MIMAT0007559	gga-miR-1675
1947	gga-miR-1759-3p	GCCUCCUCUCCCAUCCUCUCCUUCU	1	63	25	experimental		mature miRNA	standard	MIMAT0026783	gga-miR-1759-3p
1948	gga-miR-200b-5p	UCUUACUGGGCAGCAUUGGA	1	63	26	experimental		mature miRNA	standard	MIMAT0026534	gga-miR-200b-5p
1949	gga-miR-3538	GUUCGGUGAUGAAACCAUGGA	1	63	27	experimental		mature miRNA	standard	MIMAT0016389	gga-miR-3538
1950	gga-miR-6573-3p	GGAGGCACUCUGACUUCUCGGA	1	63	28	experimental		mature miRNA	standard	MIMAT0025654	gga-miR-6573-3p
1951	gga-miR-6665-5p	UGCCUGAAGGAUUUUGAUGCCC	1	63	29	experimental		mature miRNA	standard	MIMAT0025766	gga-miR-6665-5p
1952	gga-miR-7464-3p	UGGCACUGCACUGAGUCAUUGGC	1	63	30	experimental		mature miRNA	standard	MIMAT0029083	gga-miR-7464-3p
1953	Ctr06-3M05		1	63	31	control	control_spike_calibration	LC Internal Use	control
1954	Ctr06-3M10		1	64	1	control	control_spike_calibration	LC Internal Use	control
1955	gga-miR-133a-3p	UUGGUCCCCUUCAACCAGCUGU	1	64	2	experimental		mature miRNA	standard	MIMAT0001126	gga-miR-133a-3p
1956	gga-miR-1593	ACCAUCUGAUUUGGACACGCA	1	64	3	experimental		mature miRNA	standard	MIMAT0007456	gga-miR-1593
1957	gga-miR-1676-3p	AGAGCGAAGUGGGUGGGAAUGU	1	64	4	experimental		mature miRNA	standard	MIMAT0007561	gga-miR-1676-3p
1958	gga-miR-1759-5p	UAGGGUAGGAGGAGAGAGGUGU	1	64	5	experimental		mature miRNA	standard	MIMAT0007666	gga-miR-1759-5p
1959	gga-miR-202-3p	AGAGGCAUAGAGCAUGGGAAAA	1	64	6	experimental		mature miRNA	standard	MIMAT0003355	gga-miR-202-3p
1960	gga-miR-3539	CAGAGGAAGACUGAUGCUAGUU	1	64	7	experimental		mature miRNA	standard	MIMAT0016390	gga-miR-3539
1961	gga-miR-6573-5p	UGGAGAAGUGAGGGGCUCUCUG	1	64	8	experimental		mature miRNA	standard	MIMAT0025653	gga-miR-6573-5p
1962	gga-miR-6666-3p	UCGGGUGAUGAGGACAGGAGGA	1	64	9	experimental		mature miRNA	standard	MIMAT0025767	gga-miR-6666-3p
1963	gga-miR-7464-5p	CAAUGGCUCAGUGCAGUGCCGUU	1	64	10	experimental		mature miRNA	standard	MIMAT0029082	gga-miR-7464-5p
1964	Ctr06-3M10		1	64	11	control	control_spike_calibration	LC Internal Use	control
1965	gga-miR-133a-3p	UUGGUCCCCUUCAACCAGCUGU	1	64	12	experimental		mature miRNA	standard	MIMAT0001126	gga-miR-133a-3p
1966	gga-miR-1593	ACCAUCUGAUUUGGACACGCA	1	64	13	experimental		mature miRNA	standard	MIMAT0007456	gga-miR-1593
1967	gga-miR-1676-3p	AGAGCGAAGUGGGUGGGAAUGU	1	64	14	experimental		mature miRNA	standard	MIMAT0007561	gga-miR-1676-3p
1968	gga-miR-1759-5p	UAGGGUAGGAGGAGAGAGGUGU	1	64	15	experimental		mature miRNA	standard	MIMAT0007666	gga-miR-1759-5p
1969	gga-miR-202-3p	AGAGGCAUAGAGCAUGGGAAAA	1	64	16	experimental		mature miRNA	standard	MIMAT0003355	gga-miR-202-3p
1970	gga-miR-3539	CAGAGGAAGACUGAUGCUAGUU	1	64	17	experimental		mature miRNA	standard	MIMAT0016390	gga-miR-3539
1971	gga-miR-6573-5p	UGGAGAAGUGAGGGGCUCUCUG	1	64	18	experimental		mature miRNA	standard	MIMAT0025653	gga-miR-6573-5p
1972	gga-miR-6666-3p	UCGGGUGAUGAGGACAGGAGGA	1	64	19	experimental		mature miRNA	standard	MIMAT0025767	gga-miR-6666-3p
1973	gga-miR-7464-5p	CAAUGGCUCAGUGCAGUGCCGUU	1	64	20	experimental		mature miRNA	standard	MIMAT0029082	gga-miR-7464-5p
1974	Ctr06-3M10		1	64	21	control	control_spike_calibration	LC Internal Use	control
1975	gga-miR-133a-3p	UUGGUCCCCUUCAACCAGCUGU	1	64	22	experimental		mature miRNA	standard	MIMAT0001126	gga-miR-133a-3p
1976	gga-miR-1593	ACCAUCUGAUUUGGACACGCA	1	64	23	experimental		mature miRNA	standard	MIMAT0007456	gga-miR-1593
1977	gga-miR-1676-3p	AGAGCGAAGUGGGUGGGAAUGU	1	64	24	experimental		mature miRNA	standard	MIMAT0007561	gga-miR-1676-3p
1978	gga-miR-1759-5p	UAGGGUAGGAGGAGAGAGGUGU	1	64	25	experimental		mature miRNA	standard	MIMAT0007666	gga-miR-1759-5p
1979	gga-miR-202-3p	AGAGGCAUAGAGCAUGGGAAAA	1	64	26	experimental		mature miRNA	standard	MIMAT0003355	gga-miR-202-3p
1980	gga-miR-3539	CAGAGGAAGACUGAUGCUAGUU	1	64	27	experimental		mature miRNA	standard	MIMAT0016390	gga-miR-3539
1981	gga-miR-6573-5p	UGGAGAAGUGAGGGGCUCUCUG	1	64	28	experimental		mature miRNA	standard	MIMAT0025653	gga-miR-6573-5p
1982	gga-miR-6666-3p	UCGGGUGAUGAGGACAGGAGGA	1	64	29	experimental		mature miRNA	standard	MIMAT0025767	gga-miR-6666-3p
1983	gga-miR-7464-5p	CAAUGGCUCAGUGCAGUGCCGUU	1	64	30	experimental		mature miRNA	standard	MIMAT0029082	gga-miR-7464-5p
1984	Ctr06-3M10		1	64	31	control	control_spike_calibration	LC Internal Use	control
1985	Ctr07-3P		1	65	1	control	control_spike_calibration	LC Internal Use	control
1986	gga-miR-133a-5p	AGCUGGUAAAAUGGAACCAAAUC	1	65	2	experimental		mature miRNA	standard	MIMAT0026509	gga-miR-133a-5p
1987	gga-miR-1594	UGGUGGGGAUGGGUUGGGGUU	1	65	3	experimental		mature miRNA	standard	MIMAT0007457	gga-miR-1594
1988	gga-miR-1676-5p	CCUGACUCAUCCCCUUUGCUCC	1	65	4	experimental		mature miRNA	standard	MIMAT0007560	gga-miR-1676-5p
1989	gga-miR-17-5p	CAAAGUGCUUACAGUGCAGGUAGU	1	65	5	experimental		mature miRNA	standard	MIMAT0001114	gga-miR-17-5p
1990	gga-miR-202-5p	UUUCCUAUGCAUAUACUUCUUU	1	65	6	experimental		mature miRNA	standard	MIMAT0003354	gga-miR-202-5p
1991	gga-miR-3540	AUGGUGGAAGAACAAGGCCUGC	1	65	7	experimental		mature miRNA	standard	MIMAT0016391	gga-miR-3540
1992	gga-miR-6574-3p	UGUCUGUAGAAAAGACAGGAUGU	1	65	8	experimental		mature miRNA	standard	MIMAT0025656	gga-miR-6574-3p
1993	gga-miR-6667-5p	AGGGAAGGUGGCAAGCAUGUU	1	65	9	experimental		mature miRNA	standard	MIMAT0025768	gga-miR-6667-5p
1994	gga-miR-7465-3p	AGAGUGUCUGUUACCUGACC	1	65	10	experimental		mature miRNA	standard	MIMAT0029085	gga-miR-7465-3p
1995	Ctr07-3P		1	65	11	control	control_spike_calibration	LC Internal Use	control
1996	gga-miR-133a-5p	AGCUGGUAAAAUGGAACCAAAUC	1	65	12	experimental		mature miRNA	standard	MIMAT0026509	gga-miR-133a-5p
1997	gga-miR-1594	UGGUGGGGAUGGGUUGGGGUU	1	65	13	experimental		mature miRNA	standard	MIMAT0007457	gga-miR-1594
1998	gga-miR-1676-5p	CCUGACUCAUCCCCUUUGCUCC	1	65	14	experimental		mature miRNA	standard	MIMAT0007560	gga-miR-1676-5p
1999	gga-miR-17-5p	CAAAGUGCUUACAGUGCAGGUAGU	1	65	15	experimental		mature miRNA	standard	MIMAT0001114	gga-miR-17-5p
[truncated: 1,969 more rows]

## Sheet: MIAME
MetaRow	MetaColumn	Row	Column	Reporter Identifier	Reporter Name	Reporter BioSequence Database Entry[mirna]	Reporter BioSequence Type	Reporter BioSequence Polymer Type	Reporter Group [role]	Reporter Control Type	Reporter Comment
1	1	1	1	992	BKG0				Control	control_empty
1	1	1	2	1042	empty				Control	control_empty
1	1	1	3	1042	empty				Control	control_empty
1	1	1	4	1042	empty				Control	control_empty
1	1	1	5	1042	empty				Control	control_empty
1	1	1	6	1042	empty				Control	control_empty
1	1	1	7	1042	empty				Control	control_empty
1	1	1	8	1042	empty				Control	control_empty
1	1	1	9	1042	empty				Control	control_empty
1	1	1	10	1042	empty				Control	control_empty
1	1	1	11	992	BKG0				Control	control_empty
1	1	1	12	1042	empty				Control	control_empty
1	1	1	13	1042	empty				Control	control_empty
1	1	1	14	1042	empty				Control	control_empty
1	1	1	15	1042	empty				Control	control_empty
1	1	1	16	1042	empty				Control	control_empty
1	1	1	17	1042	empty				Control	control_empty
1	1	1	18	1042	empty				Control	control_empty
1	1	1	19	1042	empty				Control	control_empty
1	1	1	20	1042	empty				Control	control_empty
1	1	1	21	992	BKG0				Control	control_empty
1	1	1	22	1042	empty				Control	control_empty
1	1	1	23	1042	empty				Control	control_empty
1	1	1	24	1042	empty				Control	control_empty
1	1	1	25	1042	empty				Control	control_empty
1	1	1	26	1042	empty				Control	control_empty
1	1	1	27	1042	empty				Control	control_empty
1	1	1	28	1042	empty				Control	control_empty
1	1	1	29	1042	empty				Control	control_empty
1	1	1	30	1042	empty				Control	control_empty
1	1	1	31	992	BKG0				Control	control_empty
1	1	2	1	993	PUC2PM		ss_oligo	DNA	Control	control_spike_calibration
1	1	2	2	1042	empty				Control	control_empty
1	1	2	3	1042	empty				Control	control_empty
1	1	2	4	1042	empty				Control	control_empty
1	1	2	5	1042	empty				Control	control_empty
1	1	2	6	1042	empty				Control	control_empty
1	1	2	7	1042	empty				Control	control_empty
1	1	2	8	1042	empty				Control	control_empty
1	1	2	9	1042	empty				Control	control_empty
1	1	2	10	1042	empty				Control	control_empty
1	1	2	11	993	PUC2PM		ss_oligo	DNA	Control	control_spike_calibration
1	1	2	12	1042	empty				Control	control_empty
1	1	2	13	1042	empty				Control	control_empty
1	1	2	14	1042	empty				Control	control_empty
1	1	2	15	1042	empty				Control	control_empty
1	1	2	16	1042	empty				Control	control_empty
1	1	2	17	1042	empty				Control	control_empty
1	1	2	18	1042	empty				Control	control_empty
1	1	2	19	1042	empty				Control	control_empty
1	1	2	20	1042	empty				Control	control_empty
1	1	2	21	993	PUC2PM		ss_oligo	DNA	Control	control_spike_calibration
1	1	2	22	1042	empty				Control	control_empty
1	1	2	23	1042	empty				Control	control_empty
1	1	2	24	1042	empty				Control	control_empty
1	1	2	25	1042	empty				Control	control_empty
1	1	2	26	1042	empty				Control	control_empty
1	1	2	27	1042	empty				Control	control_empty
1	1	2	28	1042	empty				Control	control_empty
1	1	2	29	1042	empty				Control	control_empty
1	1	2	30	1042	empty				Control	control_empty
1	1	2	31	993	PUC2PM		ss_oligo	DNA	Control	control_spike_calibration
1	1	3	1	994	PUC2MM		ss_oligo	DNA	Control	control_spike_calibration
1	1	3	2	1042	empty				Control	control_empty
1	1	3	3	1042	empty				Control	control_empty
1	1	3	4	1042	empty				Control	control_empty
1	1	3	5	1042	empty				Control	control_empty
1	1	3	6	1042	empty				Control	control_empty
1	1	3	7	1042	empty				Control	control_empty
1	1	3	8	1042	empty				Control	control_empty
1	1	3	9	1042	empty				Control	control_empty
1	1	3	10	1042	empty				Control	control_empty
1	1	3	11	994	PUC2MM		ss_oligo	DNA	Control	control_spike_calibration
1	1	3	12	1042	empty				Control	control_empty
1	1	3	13	1042	empty				Control	control_empty
1	1	3	14	1042	empty				Control	control_empty
1	1	3	15	1042	empty				Control	control_empty
1	1	3	16	1042	empty				Control	control_empty
1	1	3	17	1042	empty				Control	control_empty
1	1	3	18	1042	empty				Control	control_empty
1	1	3	19	1042	empty				Control	control_empty
1	1	3	20	1042	empty				Control	control_empty
1	1	3	21	994	PUC2MM		ss_oligo	DNA	Control	control_spike_calibration
1	1	3	22	1042	empty				Control	control_empty
1	1	3	23	1042	empty				Control	control_empty
1	1	3	24	1042	empty				Control	control_empty
1	1	3	25	1042	empty				Control	control_empty
1	1	3	26	1042	empty				Control	control_empty
1	1	3	27	1042	empty				Control	control_empty
1	1	3	28	1042	empty				Control	control_empty
1	1	3	29	1042	empty				Control	control_empty
1	1	3	30	1042	empty				Control	control_empty
1	1	3	31	994	PUC2MM		ss_oligo	DNA	Control	control_spike_calibration
1	1	4	1	992	BKG0				Control	control_empty
1	1	4	2	1042	empty				Control	control_empty
1	1	4	3	1042	empty				Control	control_empty
1	1	4	4	1042	empty				Control	control_empty
1	1	4	5	1042	empty				Control	control_empty
1	1	4	6	1042	empty				Control	control_empty
1	1	4	7	1042	empty				Control	control_empty
1	1	4	8	1042	empty				Control	control_empty
1	1	4	9	1042	empty				Control	control_empty
1	1	4	10	1042	empty				Control	control_empty
1	1	4	11	992	BKG0				Control	control_empty
1	1	4	12	1042	empty				Control	control_empty
1	1	4	13	1042	empty				Control	control_empty
1	1	4	14	1042	empty				Control	control_empty
1	1	4	15	1042	empty				Control	control_empty
1	1	4	16	1042	empty				Control	control_empty
1	1	4	17	1042	empty				Control	control_empty
1	1	4	18	1042	empty				Control	control_empty
1	1	4	19	1042	empty				Control	control_empty
1	1	4	20	1042	empty				Control	control_empty
1	1	4	21	992	BKG0				Control	control_empty
1	1	4	22	1042	empty				Control	control_empty
1	1	4	23	1042	empty				Control	control_empty
1	1	4	24	1042	empty				Control	control_empty
1	1	4	25	1042	empty				Control	control_empty
1	1	4	26	1042	empty				Control	control_empty
1	1	4	27	1042	empty				Control	control_empty
1	1	4	28	1042	empty				Control	control_empty
1	1	4	29	1042	empty				Control	control_empty
1	1	4	30	1042	empty				Control	control_empty
1	1	4	31	992	BKG0				Control	control_empty
1	1	5	1	997	PUC2PM-20B		ss_oligo	DNA	Control	control_spike_calibration
1	1	5	2	1042	empty				Control	control_empty
1	1	5	3	1042	empty				Control	control_empty
1	1	5	4	1042	empty				Control	control_empty
1	1	5	5	1042	empty				Control	control_empty
1	1	5	6	1042	empty				Control	control_empty
1	1	5	7	1042	empty				Control	control_empty
1	1	5	8	1042	empty				Control	control_empty
1	1	5	9	1042	empty				Control	control_empty
1	1	5	10	1042	empty				Control	control_empty
1	1	5	11	997	PUC2PM-20B		ss_oligo	DNA	Control	control_spike_calibration
1	1	5	12	1042	empty				Control	control_empty
1	1	5	13	1042	empty				Control	control_empty
1	1	5	14	1042	empty				Control	control_empty
1	1	5	15	1042	empty				Control	control_empty
1	1	5	16	1042	empty				Control	control_empty
1	1	5	17	1042	empty				Control	control_empty
1	1	5	18	1042	empty				Control	control_empty
1	1	5	19	1042	empty				Control	control_empty
1	1	5	20	1042	empty				Control	control_empty
1	1	5	21	997	PUC2PM-20B		ss_oligo	DNA	Control	control_spike_calibration
1	1	5	22	1042	empty				Control	control_empty
1	1	5	23	1042	empty				Control	control_empty
1	1	5	24	1042	empty				Control	control_empty
1	1	5	25	1042	empty				Control	control_empty
1	1	5	26	1042	empty				Control	control_empty
1	1	5	27	1042	empty				Control	control_empty
1	1	5	28	1042	empty				Control	control_empty
1	1	5	29	1042	empty				Control	control_empty
1	1	5	30	1042	empty				Control	control_empty
1	1	5	31	997	PUC2PM-20B		ss_oligo	DNA	Control	control_spike_calibration
1	1	6	1	998	PUC2MM-20B		ss_oligo	DNA	Control	control_spike_calibration
1	1	6	2	1042	empty				Control	control_empty
1	1	6	3	1042	empty				Control	control_empty
1	1	6	4	1042	empty				Control	control_empty
1	1	6	5	1042	empty				Control	control_empty
1	1	6	6	1042	empty				Control	control_empty
1	1	6	7	1042	empty				Control	control_empty
1	1	6	8	1042	empty				Control	control_empty
1	1	6	9	1042	empty				Control	control_empty
1	1	6	10	1042	empty				Control	control_empty
1	1	6	11	998	PUC2MM-20B		ss_oligo	DNA	Control	control_spike_calibration
1	1	6	12	1042	empty				Control	control_empty
1	1	6	13	1042	empty				Control	control_empty
1	1	6	14	1042	empty				Control	control_empty
1	1	6	15	1042	empty				Control	control_empty
1	1	6	16	1042	empty				Control	control_empty
1	1	6	17	1042	empty				Control	control_empty
1	1	6	18	1042	empty				Control	control_empty
1	1	6	19	1042	empty				Control	control_empty
1	1	6	20	1042	empty				Control	control_empty
1	1	6	21	998	PUC2MM-20B		ss_oligo	DNA	Control	control_spike_calibration
1	1	6	22	1042	empty				Control	control_empty
1	1	6	23	1042	empty				Control	control_empty
1	1	6	24	1042	empty				Control	control_empty
1	1	6	25	1042	empty				Control	control_empty
1	1	6	26	1042	empty				Control	control_empty
1	1	6	27	1042	empty				Control	control_empty
1	1	6	28	1042	empty				Control	control_empty
1	1	6	29	1042	empty				Control	control_empty
1	1	6	30	1042	empty				Control	control_empty
1	1	6	31	998	PUC2MM-20B		ss_oligo	DNA	Control	control_spike_calibration
1	1	7	1	999	a2-PUC2PM-20B		ss_oligo	DNA	Control	control_spike_calibration
1	1	7	2	1042	empty				Control	control_empty
1	1	7	3	1042	empty				Control	control_empty
1	1	7	4	1042	empty				Control	control_empty
1	1	7	5	1042	empty				Control	control_empty
1	1	7	6	1042	empty				Control	control_empty
1	1	7	7	1042	empty				Control	control_empty
1	1	7	8	1042	empty				Control	control_empty
1	1	7	9	1042	empty				Control	control_empty
1	1	7	10	1042	empty				Control	control_empty
1	1	7	11	999	a2-PUC2PM-20B		ss_oligo	DNA	Control	control_spike_calibration
1	1	7	12	1042	empty				Control	control_empty
1	1	7	13	1042	empty				Control	control_empty
1	1	7	14	1042	empty				Control	control_empty
1	1	7	15	1042	empty				Control	control_empty
1	1	7	16	1042	empty				Control	control_empty
1	1	7	17	1042	empty				Control	control_empty
1	1	7	18	1042	empty				Control	control_empty
1	1	7	19	1042	empty				Control	control_empty
1	1	7	20	1042	empty				Control	control_empty
1	1	7	21	999	a2-PUC2PM-20B		ss_oligo	DNA	Control	control_spike_calibration
1	1	7	22	1042	empty				Control	control_empty
1	1	7	23	1042	empty				Control	control_empty
1	1	7	24	1042	empty				Control	control_empty
1	1	7	25	1042	empty				Control	control_empty
1	1	7	26	1042	empty				Control	control_empty
1	1	7	27	1042	empty				Control	control_empty
1	1	7	28	1042	empty				Control	control_empty
1	1	7	29	1042	empty				Control	control_empty
1	1	7	30	1042	empty				Control	control_empty
1	1	7	31	999	a2-PUC2PM-20B		ss_oligo	DNA	Control	control_spike_calibration
1	1	8	1	1000	a2-PUC2MM-20B		ss_oligo	DNA	Control	control_spike_calibration
1	1	8	2	1042	empty				Control	control_empty
1	1	8	3	1042	empty				Control	control_empty
1	1	8	4	1042	empty				Control	control_empty
1	1	8	5	1042	empty				Control	control_empty
1	1	8	6	1042	empty				Control	control_empty
1	1	8	7	1042	empty				Control	control_empty
1	1	8	8	1042	empty				Control	control_empty
1	1	8	9	1042	empty				Control	control_empty
1	1	8	10	1042	empty				Control	control_empty
1	1	8	11	1000	a2-PUC2MM-20B		ss_oligo	DNA	Control	control_spike_calibration
1	1	8	12	1042	empty				Control	control_empty
1	1	8	13	1042	empty				Control	control_empty
1	1	8	14	1042	empty				Control	control_empty
1	1	8	15	1042	empty				Control	control_empty
1	1	8	16	1042	empty				Control	control_empty
1	1	8	17	1042	empty				Control	control_empty
1	1	8	18	1042	empty				Control	control_empty
1	1	8	19	1042	empty				Control	control_empty
1	1	8	20	1042	empty				Control	control_empty
1	1	8	21	1000	a2-PUC2MM-20B		ss_oligo	DNA	Control	control_spike_calibration
1	1	8	22	1042	empty				Control	control_empty
1	1	8	23	1042	empty				Control	control_empty
1	1	8	24	1042	empty				Control	control_empty
1	1	8	25	1042	empty				Control	control_empty
1	1	8	26	1042	empty				Control	control_empty
1	1	8	27	1042	empty				Control	control_empty
1	1	8	28	1042	empty				Control	control_empty
1	1	8	29	1042	empty				Control	control_empty
1	1	8	30	1042	empty				Control	control_empty
1	1	8	31	1000	a2-PUC2MM-20B		ss_oligo	DNA	Control	control_spike_calibration
1	1	9	1	1001	a3-PUC2PM-20B		ss_oligo	DNA	Control	control_spike_calibration
1	1	9	2	1	gga-let-7a-2-3p	MIMAT0031037	ss_oligo	DNA	Experimental		Target seq (5' to 3') CUGUACAACCUCCUAGCUUUCC
1	1	9	3	112	gga-miR-153-5p	MIMAT0026502	ss_oligo	DNA	Experimental		Target seq (5' to 3') UCAUUUUUGUGAUGUUGCAGCU
1	1	9	4	223	gga-miR-1632-5p	MIMAT0007504	ss_oligo	DNA	Experimental		Target seq (5' to 3') UGCUUGUUUUUGGAUGAGCUUGC
1	1	9	5	334	gga-miR-1719	MIMAT0007616	ss_oligo	DNA	Experimental		Target seq (5' to 3') AAAGAUGAUGAGUUGCUGAUG
1	1	9	6	445	gga-miR-1805-3p	MIMAT0007723	ss_oligo	DNA	Experimental		Target seq (5' to 3') UGUAUUGGAACACUACAGCUC
1	1	9	7	556	gga-miR-29c-3p	MIMAT0001183	ss_oligo	DNA	Experimental		Target seq (5' to 3') UAGCACCAUUUGAAAUCGGU
1	1	9	8	667	gga-miR-6546-3p	MIMAT0025596	ss_oligo	DNA	Experimental		Target seq (5' to 3') GGAGUUCAGCUGUGCUGCUGC
1	1	9	9	778	gga-miR-6614-3p	MIMAT0025709	ss_oligo	DNA	Experimental		Target seq (5' to 3') ACAGGACAGCGAGAAGGC
1	1	9	10	889	gga-miR-7437-3p	MIMAT0029029	ss_oligo	DNA	Experimental		Target seq (5' to 3') CUUCCUCCAACCUCAGUAUCA
1	1	9	11	1001	a3-PUC2PM-20B		ss_oligo	DNA	Control	control_spike_calibration
1	1	9	12	1	gga-let-7a-2-3p	MIMAT0031037	ss_oligo	DNA	Experimental		Target seq (5' to 3') CUGUACAACCUCCUAGCUUUCC
1	1	9	13	112	gga-miR-153-5p	MIMAT0026502	ss_oligo	DNA	Experimental		Target seq (5' to 3') UCAUUUUUGUGAUGUUGCAGCU
1	1	9	14	223	gga-miR-1632-5p	MIMAT0007504	ss_oligo	DNA	Experimental		Target seq (5' to 3') UGCUUGUUUUUGGAUGAGCUUGC
1	1	9	15	334	gga-miR-1719	MIMAT0007616	ss_oligo	DNA	Experimental		Target seq (5' to 3') AAAGAUGAUGAGUUGCUGAUG
1	1	9	16	445	gga-miR-1805-3p	MIMAT0007723	ss_oligo	DNA	Experimental		Target seq (5' to 3') UGUAUUGGAACACUACAGCUC
1	1	9	17	556	gga-miR-29c-3p	MIMAT0001183	ss_oligo	DNA	Experimental		Target seq (5' to 3') UAGCACCAUUUGAAAUCGGU
1	1	9	18	667	gga-miR-6546-3p	MIMAT0025596	ss_oligo	DNA	Experimental		Target seq (5' to 3') GGAGUUCAGCUGUGCUGCUGC
1	1	9	19	778	gga-miR-6614-3p	MIMAT0025709	ss_oligo	DNA	Experimental		Target seq (5' to 3') ACAGGACAGCGAGAAGGC
1	1	9	20	889	gga-miR-7437-3p	MIMAT0029029	ss_oligo	DNA	Experimental		Target seq (5' to 3') CUUCCUCCAACCUCAGUAUCA
1	1	9	21	1001	a3-PUC2PM-20B		ss_oligo	DNA	Control	control_spike_calibration
1	1	9	22	1	gga-let-7a-2-3p	MIMAT0031037	ss_oligo	DNA	Experimental		Target seq (5' to 3') CUGUACAACCUCCUAGCUUUCC
1	1	9	23	112	gga-miR-153-5p	MIMAT0026502	ss_oligo	DNA	Experimental		Target seq (5' to 3') UCAUUUUUGUGAUGUUGCAGCU
1	1	9	24	223	gga-miR-1632-5p	MIMAT0007504	ss_oligo	DNA	Experimental		Target seq (5' to 3') UGCUUGUUUUUGGAUGAGCUUGC
1	1	9	25	334	gga-miR-1719	MIMAT0007616	ss_oligo	DNA	Experimental		Target seq (5' to 3') AAAGAUGAUGAGUUGCUGAUG
1	1	9	26	445	gga-miR-1805-3p	MIMAT0007723	ss_oligo	DNA	Experimental		Target seq (5' to 3') UGUAUUGGAACACUACAGCUC
1	1	9	27	556	gga-miR-29c-3p	MIMAT0001183	ss_oligo	DNA	Experimental		Target seq (5' to 3') UAGCACCAUUUGAAAUCGGU
1	1	9	28	667	gga-miR-6546-3p	MIMAT0025596	ss_oligo	DNA	Experimental		Target seq (5' to 3') GGAGUUCAGCUGUGCUGCUGC
1	1	9	29	778	gga-miR-6614-3p	MIMAT0025709	ss_oligo	DNA	Experimental		Target seq (5' to 3') ACAGGACAGCGAGAAGGC
1	1	9	30	889	gga-miR-7437-3p	MIMAT0029029	ss_oligo	DNA	Experimental		Target seq (5' to 3') CUUCCUCCAACCUCAGUAUCA
1	1	9	31	1001	a3-PUC2PM-20B		ss_oligo	DNA	Control	control_spike_calibration
1	1	10	1	1002	a3-PUC2MM-20B		ss_oligo	DNA	Control	control_spike_calibration
1	1	10	2	2	gga-let-7a-3p	MIMAT0026491	ss_oligo	DNA	Experimental		Target seq (5' to 3') CUAUACAAUCUACUGUCUUUCC
1	1	10	3	113	gga-miR-155	MIMAT0001106	ss_oligo	DNA	Experimental		Target seq (5' to 3') UUAAUGCUAAUCGUGAUAGGGG
1	1	10	4	224	gga-miR-1633	MIMAT0007506	ss_oligo	DNA	Experimental		Target seq (5' to 3') UGCGCUUCUGCUCAGCUCGGUGU
1	1	10	5	335	gga-miR-1720-3p	MIMAT0007618	ss_oligo	DNA	Experimental		Target seq (5' to 3') AAGCAACGAGAGGUCGGUCUGA
1	1	10	6	446	gga-miR-1805-5p	MIMAT0007722	ss_oligo	DNA	Experimental		Target seq (5' to 3') GAGUUGUAGUCUUUCAAACAGA
1	1	10	7	557	gga-miR-29c-5p	MIMAT0026544	ss_oligo	DNA	Experimental		Target seq (5' to 3') CCGAUUUCUCUUGGUGUUCAG
1	1	10	8	668	gga-miR-6546-5p	MIMAT0025595	ss_oligo	DNA	Experimental		Target seq (5' to 3') AGGAGCGCCUCUGAGCUCCCCU
1	1	10	9	779	gga-miR-6615-3p	MIMAT0025711	ss_oligo	DNA	Experimental		Target seq (5' to 3') UGGCACUGAUGUGUUCUCCACA
1	1	10	10	890	gga-miR-7437-5p	MIMAT0029028	ss_oligo	DNA	Experimental		Target seq (5' to 3') GAACAGAGCGUUGGAAGGUAGGG
1	1	10	11	1002	a3-PUC2MM-20B		ss_oligo	DNA	Control	control_spike_calibration
1	1	10	12	2	gga-let-7a-3p	MIMAT0026491	ss_oligo	DNA	Experimental		Target seq (5' to 3') CUAUACAAUCUACUGUCUUUCC
1	1	10	13	113	gga-miR-155	MIMAT0001106	ss_oligo	DNA	Experimental		Target seq (5' to 3') UUAAUGCUAAUCGUGAUAGGGG
1	1	10	14	224	gga-miR-1633	MIMAT0007506	ss_oligo	DNA	Experimental		Target seq (5' to 3') UGCGCUUCUGCUCAGCUCGGUGU
1	1	10	15	335	gga-miR-1720-3p	MIMAT0007618	ss_oligo	DNA	Experimental		Target seq (5' to 3') AAGCAACGAGAGGUCGGUCUGA
1	1	10	16	446	gga-miR-1805-5p	MIMAT0007722	ss_oligo	DNA	Experimental		Target seq (5' to 3') GAGUUGUAGUCUUUCAAACAGA
1	1	10	17	557	gga-miR-29c-5p	MIMAT0026544	ss_oligo	DNA	Experimental		Target seq (5' to 3') CCGAUUUCUCUUGGUGUUCAG
1	1	10	18	668	gga-miR-6546-5p	MIMAT0025595	ss_oligo	DNA	Experimental		Target seq (5' to 3') AGGAGCGCCUCUGAGCUCCCCU
1	1	10	19	779	gga-miR-6615-3p	MIMAT0025711	ss_oligo	DNA	Experimental		Target seq (5' to 3') UGGCACUGAUGUGUUCUCCACA
1	1	10	20	890	gga-miR-7437-5p	MIMAT0029028	ss_oligo	DNA	Experimental		Target seq (5' to 3') GAACAGAGCGUUGGAAGGUAGGG
1	1	10	21	1002	a3-PUC2MM-20B		ss_oligo	DNA	Control	control_spike_calibration
1	1	10	22	2	gga-let-7a-3p	MIMAT0026491	ss_oligo	DNA	Experimental		Target seq (5' to 3') CUAUACAAUCUACUGUCUUUCC
1	1	10	23	113	gga-miR-155	MIMAT0001106	ss_oligo	DNA	Experimental		Target seq (5' to 3') UUAAUGCUAAUCGUGAUAGGGG
1	1	10	24	224	gga-miR-1633	MIMAT0007506	ss_oligo	DNA	Experimental		Target seq (5' to 3') UGCGCUUCUGCUCAGCUCGGUGU
1	1	10	25	335	gga-miR-1720-3p	MIMAT0007618	ss_oligo	DNA	Experimental		Target seq (5' to 3') AAGCAACGAGAGGUCGGUCUGA
1	1	10	26	446	gga-miR-1805-5p	MIMAT0007722	ss_oligo	DNA	Experimental		Target seq (5' to 3') GAGUUGUAGUCUUUCAAACAGA
1	1	10	27	557	gga-miR-29c-5p	MIMAT0026544	ss_oligo	DNA	Experimental		Target seq (5' to 3') CCGAUUUCUCUUGGUGUUCAG
1	1	10	28	668	gga-miR-6546-5p	MIMAT0025595	ss_oligo	DNA	Experimental		Target seq (5' to 3') AGGAGCGCCUCUGAGCUCCCCU
1	1	10	29	779	gga-miR-6615-3p	MIMAT0025711	ss_oligo	DNA	Experimental		Target seq (5' to 3') UGGCACUGAUGUGUUCUCCACA
1	1	10	30	890	gga-miR-7437-5p	MIMAT0029028	ss_oligo	DNA	Experimental		Target seq (5' to 3') GAACAGAGCGUUGGAAGGUAGGG
1	1	10	31	1002	a3-PUC2MM-20B		ss_oligo	DNA	Control	control_spike_calibration
1	1	11	1	1042	empty				Control	control_empty
1	1	11	2	3	gga-let-7a-5p	MIMAT0001101	ss_oligo	DNA	Experimental		Target seq (5' to 3') UGAGGUAGUAGGUUGUAUAGUU
1	1	11	3	114	gga-miR-1550-3p	MIMAT0007404	ss_oligo	DNA	Experimental		Target seq (5' to 3') CUUCACUUACACUGCUCACUGGU
1	1	11	4	225	gga-miR-1634	MIMAT0007507	ss_oligo	DNA	Experimental		Target seq (5' to 3') UGCGACGCAUCGGCCUUUCUUC
1	1	11	5	336	gga-miR-1720-5p	MIMAT0007617	ss_oligo	DNA	Experimental		Target seq (5' to 3') UGAUCACCUCGGACGUUGCUUU
1	1	11	6	447	gga-miR-1806	MIMAT0007724	ss_oligo	DNA	Experimental		Target seq (5' to 3') AGGCAGGAUCACAAGGUCUGGA
1	1	11	7	558	gga-miR-301a-3p	MIMAT0001166	ss_oligo	DNA	Experimental		Target seq (5' to 3') CAGUGCAAUAAUAUUGUCAAAGCAU
1	1	11	8	669	gga-miR-6547-3p	MIMAT0025598	ss_oligo	DNA	Experimental		Target seq (5' to 3') ACCCCUCCAUCCACCCACUCA
1	1	11	9	780	gga-miR-6615-5p	MIMAT0025710	ss_oligo	DNA	Experimental		Target seq (5' to 3') UUGGGGACACCAUCAGAACAGCCA
1	1	11	10	891	gga-miR-7438-3p	MIMAT0029031	ss_oligo	DNA	Experimental		Target seq (5' to 3') UGAGUUGUCUUCCUGAAUAGUU
1	1	11	11	1042	empty				Control	control_empty
1	1	11	12	3	gga-let-7a-5p	MIMAT0001101	ss_oligo	DNA	Experimental		Target seq (5' to 3') UGAGGUAGUAGGUUGUAUAGUU
1	1	11	13	114	gga-miR-1550-3p	MIMAT0007404	ss_oligo	DNA	Experimental		Target seq (5' to 3') CUUCACUUACACUGCUCACUGGU
1	1	11	14	225	gga-miR-1634	MIMAT0007507	ss_oligo	DNA	Experimental		Target seq (5' to 3') UGCGACGCAUCGGCCUUUCUUC
1	1	11	15	336	gga-miR-1720-5p	MIMAT0007617	ss_oligo	DNA	Experimental		Target seq (5' to 3') UGAUCACCUCGGACGUUGCUUU
[truncated: 3,643 more rows]
